# Supplementary material for: ARGONAUTE10 promotes the degradation of miR165/6 through the SDN1 and SDN2 exonucleases in Arabidopsis
Source: PLoS Biol. 2017 Feb 23;15(2):e2001272. doi: 10.1371/journal.pbio.2001272 (PMC5322904; doi:10.1371/journal.pbio.2001272)
Supplement: S4 Data — (XLSX) [file pbio.2001272.s012.xlsx]

## Sheet: AGO1 IP-RPM
S4 Data. Composition of miRNA forms in AGO1 and AGO10 IP treated with SDN1 and SDN1 catalytic mutant (SDN1-D283A).
	AGO1 IP (Mock)										AGO1 IP (SDN1)										AGO1 IP (SDN1-D283A)
RPM	br1					br2					br1					br2					br1					br2
miRNAs	FL	TA-Only	TR-Only	TR-TA	TOTAL	FL	TA-Only	TR-Only	TR-TA	TOTAL	FL	TA-Only	TR-Only	TR-TA	TOTAL	FL	TA-Only	TR-Only	TR-TA	TOTAL	FL	TA	TR	TR-TA	TOTAL	FL	TA	TR	TR-TA	TOTAL
ath-miR156a-3p	0	0	0.254719	0.254719	0.509438	0.17949	0	0.17949	0	0.35898	0.1371	0	0.0457	0	0.1828	0.253584	0	0	0	0.253584	0.115627	0	0.0385425	0	0.154169	0	0	0	0	0
ath-miR156a-5p	6769.68	1133.76	2417.03	1410.64	11731.1	6432.58	1028.48	1953.39	1397.33	10811.8	410.523	55.6169	296.867	117.038	880.045	1179.16	131.832	851.534	276.248	2438.77	251.027	44.7478	205.701	84.1768	585.653	256.894	44.9677	203.337	84.2093	589.408
ath-miR156b-3p	394.56	27.0002	4430.33	534.656	5386.55	120.618	8.79503	1633.9	223.107	1986.42	48.2592	1.3253	33.4981	13.5272	96.6098	67.8337	2.06037	68.3725	16.9901	155.257	38.1956	1.73441	11.5627	9.90542	61.3981	37.2205	1.74032	10.3297	10.049	59.3395
ath-miR156b-5p	6769.68	1133.76	2417.03	1410.64	11731.1	6432.58	1028.48	1953.39	1397.33	10811.8	410.523	55.6169	296.867	117.038	880.045	1179.16	131.832	851.534	276.248	2438.77	251.027	44.7478	205.701	84.1768	585.653	256.894	44.9677	203.337	84.2093	589.408
ath-miR156c-3p	0	0	0.509439	0	0.509439	0.17949	0	0	0	0.17949	0	0	0	0	0	0.0950939	0	0	0.031698	0.126792	0.0385425	0	0	0	0.0385425	0.0561395	0	0	0	0.0561395
ath-miR156c-5p	6769.68	1133.76	2417.03	1410.64	11731.1	6432.58	1028.48	1953.39	1397.33	10811.8	410.523	55.6169	296.867	117.038	880.045	1179.16	131.832	851.534	276.248	2438.77	251.027	44.7478	205.701	84.1768	585.653	256.894	44.9677	203.337	84.2093	589.408
ath-miR156d-3p	0	0	0	0	0	0	0	0	0	0	0	0	0	0	0	0	0	0	0	0	0	0	0	0	0	0	0	0	0	0
ath-miR156d-5p	6769.68	1133.76	2417.03	1410.64	11731.1	6432.58	1028.48	1953.39	1397.33	10811.8	410.523	55.6169	296.867	117.038	880.045	1179.16	131.832	851.534	276.248	2438.77	251.027	44.7478	205.701	84.1768	585.653	256.894	44.9677	203.337	84.2093	589.408
ath-miR156e	6769.68	1133.76	2417.03	1410.64	11731.1	6432.58	1028.48	1953.39	1397.33	10811.8	410.523	55.6169	296.867	117.038	880.045	1179.16	131.832	851.534	276.248	2438.77	251.027	44.7478	205.701	84.1768	585.653	256.894	44.9677	203.337	84.2093	589.408
ath-miR156f-3p	0	0	0	0	0	0	0	0	0	0	0	0	0	0	0	0	0	0	0	0	0	0	0	0	0	0	0	0	0	0
ath-miR156f-5p	6769.68	1133.76	2417.03	1410.64	11731.1	6432.58	1028.48	1953.39	1397.33	10811.8	410.523	55.6169	296.867	117.038	880.045	1179.16	131.832	851.534	276.248	2438.77	251.027	44.7478	205.701	84.1768	585.653	256.894	44.9677	203.337	84.2093	589.408
ath-miR156g	23.1795	3.31135	8.40574	6.6227	41.5193	22.7953	3.7693	9.3335	5.5642	41.4623	1.1882	0.1828	1.1425	0.594099	3.1076	4.12074	0.792449	2.82112	0.760751	8.49506	0.655222	0	0.501052	0.30834	1.46461	0.617535	0.449116	0.729814	0.168419	1.96488
ath-miR156h	0	0.509439	0.764158	0.254719	1.52832	0	0.358981	0.538471	0.358981	1.25643	0.0457	0	0	0.0457	0.0914	0.031698	0.0633959	0.0633959	0.031698	0.190188	0.0385425	0.077085	0.0385425	0.0385425	0.192713	0	0.0561395	0.0561395	0	0.112279
ath-miR156i	0	0	3.56607	1.78304	5.34911	0	0	1.97439	1.7949	3.76929	0	0	0.2742	0.0913999	0.3656	0.031698	0	1.04603	0.31698	1.39471	0	0	0.385425	0.15417	0.539595	0	0	0.224558	0.112279	0.336837
ath-miR156j	6.11326	0	3.56607	2.54719	12.2265	4.66675	0	1.97439	2.87185	9.51299	0.0913999	0	0.2742	0.3199	0.6855	0.887543	0	1.04603	0.507168	2.44074	0.192712	0	0.385425	0.231255	0.809392	0.224558	0	0.224558	0.168419	0.617535
ath-miR157a-3p	2.03775	0.509439	0.254719	0.764158	3.56607	2.51287	0.358981	0	0.538471	3.41032	0.5027	0	0.0457	0	0.5484	0.633959	0	0.0950939	0.031698	0.760751	0.0385425	0.0385425	0.0385425	0.0385425	0.15417	0.280698	0	0	0	0.280698
ath-miR157a-5p	275.097	24.4531	633.996	515.042	1448.59	241.415	17.7696	565.754	460.393	1285.33	28.8367	2.9705	67.5902	47.0253	146.423	63.1107	5.23017	161.184	84.6653	314.19	32.183	4.6251	61.8607	46.9062	145.575	41.3748	6.06307	69.3884	54.736	171.562
ath-miR157b-3p	2.03775	0.509439	0.254719	0.764158	3.56607	2.51287	0.358981	0	0.538471	3.41032	0.5027	0	0.0457	0	0.5484	0.633959	0	0.0950939	0.031698	0.760751	0.0385425	0.0385425	0.0385425	0.0385425	0.15417	0.280698	0	0	0	0.280698
ath-miR157b-5p	275.097	24.4531	633.996	515.042	1448.59	241.415	17.7696	565.754	460.393	1285.33	28.8367	2.9705	67.5902	47.0253	146.423	63.1107	5.23017	161.184	84.6653	314.19	32.183	4.6251	61.8607	46.9062	145.575	41.3748	6.06307	69.3884	54.736	171.562
ath-miR157c-3p	18.5945	5.60382	4.83967	7.8963	36.9343	5.02573	1.07694	1.43592	3.58981	11.1284	1.1425	0.0913999	1.0511	0.457	2.742	2.18716	0.538866	0.855845	1.10943	4.6913	0.385425	0.231255	0.15417	0.423967	1.19482	0.392977	0.224558	0.168419	0.280698	1.06665
ath-miR157c-5p	275.097	24.4531	633.996	515.042	1448.59	241.415	17.7696	565.754	460.393	1285.33	28.8367	2.9705	67.5902	47.0253	146.423	63.1107	5.23017	161.184	84.6653	314.19	32.183	4.6251	61.8607	46.9062	145.575	41.3748	6.06307	69.3884	54.736	171.562
ath-miR157d	8.91518	4.33023	27.5097	44.8306	85.5857	7.5386	3.41032	24.7697	40.5648	76.2834	0.868299	0.594099	3.2447	5.2098	9.9169	1.67999	0.729053	7.98789	7.41733	17.8143	0.925019	0.385425	2.69797	4.47093	8.47934	0.954372	0.898232	3.25609	4.21046	9.31915
ath-miR158a-3p	13214.8	2572.67	15859.8	19548.7	51196	15463.8	2669.92	18944.1	19305.8	56383.6	1399.7	115.804	2875.67	1271.28	5662.45	3245.27	301.416	5793.19	2666.81	12006.7	1728.86	273.844	1331.45	2122.8	5456.95	2185.17	340.43	1528.01	2612.68	6666.29
ath-miR158a-5p	77.18	11.7171	1.01888	10.9529	100.869	50.7958	6.28216	0.717962	5.74369	63.5396	2.2393	0.1828	0.0913999	0.0913999	2.6049	6.08601	0.221886	0.253584	0.538866	7.10035	0.886477	0.15417	0.0385425	0.077085	1.15627	0.842093	0.168419	0.0561395	0.224558	1.29121
ath-miR158b	57.3118	15.7926	75.1422	101.124	249.371	77.8988	16.1541	87.5913	91.0016	272.646	7.08349	0.457	18.0058	5.89529	31.4416	18.3848	1.77509	33.8217	12.2988	66.2804	10.2908	1.69587	7.66995	9.36582	29.0224	11.9016	1.74032	8.70162	10.9472	33.2907
ath-miR159a	47395.1	821.725	17534.9	6203.94	71955.7	51930.7	819.553	16086.6	5298.02	74134.9	4994	143.132	3627.89	707.892	9472.91	12404.7	323.795	8319.36	1344.22	22392.1	4979.5	196.258	3782.25	785.264	9743.27	5151.92	189.695	3541.95	857.306	9740.87
ath-miR159b-3p	40482.8	3465.46	17534.9	8963.57	70446.7	43751.5	3753.14	16086.6	7939.58	71530.8	4362.43	111.736	3627.89	882.649	8984.7	9887.9	267.689	8319.36	1790.21	20265.2	3388.12	183	3782.25	1057.22	8410.59	3268.44	171.731	3541.95	1100.45	8082.57
ath-miR159b-5p	3.05663	0	0.764158	0.254719	4.07551	3.94879	0	0	0	3.94879	0.2285	0	0	0.0457	0.2742	0.348678	0	0	0.031698	0.380376	0.231255	0	0	0	0.231255	0.336837	0	0	0.0561395	0.392977
ath-miR159c	83.5479	8.40574	6680.78	3217.61	9990.34	95.4889	7.71809	6649.22	2817.28	9569.71	17.7316	0.639799	1349.02	456.36	1823.75	26.6897	1.39471	3346.48	856.352	4230.92	20.6202	1.04065	1142.17	519.476	1683.31	29.0803	1.68419	1088.83	584.637	1704.23
ath-miR160a-3p	0	0	0	0	0	0	0	0	0	0	0.0457	0	0	0	0.0457	0	0	0	0	0	0	0	0	0	0	0	0	0	0	0
ath-miR160a-5p	69.7931	0	173.719	192.568	436.08	72.3346	0.358981	147.9	117.746	338.34	21.2962	1.2339	50.0415	12.1562	84.7278	66.5023	1.74339	107.741	24.5342	200.521	36.2685	1.73441	32.4913	12.3336	82.8278	44.7432	1.51577	33.01	14.9331	94.2021
ath-miR160b	69.7931	0	173.719	192.568	436.08	72.3346	0.358981	147.9	117.746	338.34	21.2962	1.2339	50.0415	12.1562	84.7278	66.5023	1.74339	107.741	24.5342	200.521	36.2685	1.73441	32.4913	12.3336	82.8278	44.7432	1.51577	33.01	14.9331	94.2021
ath-miR160c-3p	0	0	0	0	0	0.358981	0	0	0	0.358981	0.0457	0	0.0457	0	0.0914	0.0633959	0	0.0950939	0	0.15849	0	0	0	0	0	0	0	0.0561395	0	0.0561395
ath-miR160c-5p	69.7931	0	173.719	192.568	436.08	72.3346	0.358981	147.9	117.746	338.34	21.2962	1.2339	50.0415	12.1562	84.7278	66.5023	1.74339	107.741	24.5342	200.521	36.2685	1.73441	32.4913	12.3336	82.8278	44.7432	1.51577	33.01	14.9331	94.2021
ath-miR161.1	68519.2	29.038	1393.06	10093.3	80034.6	36707	17.949	530.035	4064.92	41319.9	6872.09	20.9306	120.739	1089.76	8103.52	11328.1	25.7388	243.916	1344.6	12942.4	3304.13	17.9223	72.4599	679.465	4073.98	3695.38	24.7575	78.7076	893.573	4692.42
ath-miR161.2	4.33023	21.1417	10.9529	28.0191	64.4439	5.74369	18.667	10.9489	29.0774	64.437	0.913999	1.4624	2.8334	1.9194	7.1292	2.63093	3.67696	6.2762	3.32829	15.9124	1.42607	2.31255	1.96567	4.31676	10.0211	1.8526	1.90874	2.18944	4.09818	10.049
ath-miR162a-3p	81895.8	1520.93	5293.32	12722.7	101433	63127.1	1763.49	4735.5	13728.1	83354.2	1556.04	66.6305	378.076	374.785	2375.53	3828.99	154.179	826.651	751.147	5560.97	573.859	57.2356	134.59	169.51	935.195	516.989	56.3641	121.43	162.355	857.138
ath-miR162a-5p	127.614	0	6.11326	7.13214	140.859	106.438	0	4.48726	7.17962	118.105	12.0648	0.0457	0.2285	0.822599	13.1616	31.0957	0.031698	1.39471	1.83848	34.3606	3.85425	0.0385425	0.231255	0.385425	4.50947	2.63856	0	0.168419	0.168419	2.9754
ath-miR162b-3p	81895.8	1520.93	5293.32	12722.7	101433	63127.1	1763.49	4735.5	13728.1	83354.2	1556.04	66.6305	378.076	374.785	2375.53	3828.99	154.179	826.651	751.147	5560.97	573.859	57.2356	134.59	169.51	935.195	516.989	56.3641	121.43	162.355	857.138
ath-miR162b-5p	127.614	0	6.11326	7.13214	140.859	106.438	0	4.48726	7.17962	118.105	12.0648	0.0457	0.2285	0.822599	13.1616	31.0957	0.031698	1.39471	1.83848	34.3606	3.85425	0.0385425	0.231255	0.385425	4.50947	2.63856	0	0.168419	0.168419	2.9754
ath-miR163	962.33	54.2552	192.313	662.015	1870.91	1030.28	66.4115	196.721	641.858	1935.27	150.81	5.3012	126.086	54.2002	336.397	302.779	10.4603	253.045	112.591	678.875	201.847	11.6013	50.1438	56.4262	320.018	229.218	13.5296	50.4133	59.5079	352.669
ath-miR164a	353.55	0.764158	233.323	76.1611	663.798	286.287	1.43592	180.567	57.4369	525.727	74.8108	2.2393	33.5438	12.0648	122.659	168.506	4.43772	86.4721	23.9003	283.316	64.7899	2.00421	19.0785	9.36582	95.2384	70.9042	1.68419	17.9646	11.3402	101.893
ath-miR164b-3p	0.764158	0	0	0	0.764158	2.33338	0	0.17949	0	2.51287	0.5027	0	0	0.0457	0.5484	0.919241	0	0.285282	0.0950939	1.29962	1.0021	0	0.15417	0.115627	1.2719	1.51577	0	0.112279	0.112279	1.74033
ath-miR164b-5p	353.55	0.764158	233.323	76.1611	663.798	286.287	1.43592	180.567	57.4369	525.727	74.8108	2.2393	33.5438	12.0648	122.659	168.506	4.43772	86.4721	23.9003	283.316	64.7899	2.00421	19.0785	9.36582	95.2384	70.9042	1.68419	17.9646	11.3402	101.893
ath-miR164c-3p	3.05663	0	0.254719	0	3.31135	1.07694	0	0.717962	0.17949	1.97439	0.0457	0	0	0	0.0457	0.285282	0	0.031698	0	0.31698	0.077085	0	0.077085	0.0385425	0.192713	0.112279	0	0.0561395	0	0.168418
ath-miR164c-5p	86.6046	0.764158	233.323	66.4817	387.173	53.3087	2.15389	180.567	52.0522	288.082	7.76899	0.3199	33.5438	11.1051	52.7378	17.6241	0.697355	86.4721	20.7622	125.556	6.28242	0.501052	19.0785	7.20744	33.0694	8.08409	0.449116	17.9646	9.3753	35.8731
ath-miR165a-3p	5635.92	128.379	1403.25	2151.61	9319.16	10360.4	180.747	1732.8	3952.92	16226.9	3103.12	107.258	564.212	1134.82	4909.41	6094.03	142.609	1005.94	1780.48	9023.06	2664.06	110.501	154.363	1075.14	4004.06	2833.87	122.553	147.591	1157.2	4261.21
ath-miR165a-5p	1.2736	0	0	0.254719	1.52832	0	0	0	0	0	0	0.0457	0	0	0.0457	0.031698	0	0	0	0.031698	0	0	0	0	0	0	0	0	0	0
ath-miR165b	5635.92	128.379	1403.25	2151.61	9319.16	10360.4	180.747	1732.8	3952.92	16226.9	3103.12	107.258	564.212	1134.82	4909.41	6094.03	142.609	1005.94	1780.48	9023.06	2664.06	110.501	154.363	1075.14	4004.06	2833.87	122.553	147.591	1157.2	4261.21
ath-miR166a-3p	8998.47	273.823	1132.23	2396.91	12801.4	19171.9	511.907	1718.26	5079.22	26481.3	6541.63	352.849	1402.21	1531.86	9828.55	13621.8	478.449	2596.82	2563.07	19260.1	5518.94	368.389	240.968	1455.63	7583.93	5706.47	397.692	235.674	1502.85	7842.69
ath-miR166a-5p	0	0	0	0	0	0.17949	0	0	0.17949	0.35898	0	0	0.0457	0	0.0457	0.031698	0.031698	0.031698	0	0.095094	0	0	0	0	0	0.0561395	0	0	0	0.0561395
ath-miR166b-3p	8998.47	273.823	1132.23	2396.91	12801.4	19171.9	511.907	1718.26	5079.22	26481.3	6541.63	352.849	1402.21	1531.86	9828.55	13621.8	478.449	2596.82	2563.07	19260.1	5518.94	368.389	240.968	1455.63	7583.93	5706.47	397.692	235.674	1502.85	7842.69
ath-miR166b-5p	0	0	0	0	0	0.17949	0	0	0.17949	0.35898	0	0	0.0457	0	0.0457	0.031698	0.031698	0.031698	0	0.095094	0	0	0	0	0	0.0561395	0	0	0	0.0561395
ath-miR166c	8998.47	273.823	1132.23	2396.91	12801.4	19171.9	511.907	1718.26	5079.22	26481.3	6541.63	352.849	1402.21	1531.86	9828.55	13621.8	478.449	2596.82	2563.07	19260.1	5518.94	368.389	240.968	1455.63	7583.93	5706.47	397.692	235.674	1502.85	7842.69
ath-miR166d	8998.47	273.823	1132.23	2396.91	12801.4	19171.9	511.907	1718.26	5079.22	26481.3	6541.63	352.849	1402.21	1531.86	9828.55	13621.8	478.449	2596.82	2563.07	19260.1	5518.94	368.389	240.968	1455.63	7583.93	5706.47	397.692	235.674	1502.85	7842.69
ath-miR166e-3p	8998.47	273.823	1132.23	2396.91	12801.4	19171.9	511.907	1718.26	5079.22	26481.3	6541.63	352.849	1402.21	1531.86	9828.55	13621.8	478.449	2596.82	2563.07	19260.1	5518.94	368.389	240.968	1455.63	7583.93	5706.47	397.692	235.674	1502.85	7842.69
ath-miR166e-5p	0	0	0	0	0	0	0	0	0	0	0	0	0	0	0	0	0	0	0	0	0	0	0	0	0	0	0	0	0	0
ath-miR166f	8998.47	273.823	1132.23	2396.91	12801.4	19171.9	511.907	1718.26	5079.22	26481.3	6541.63	352.849	1402.21	1531.86	9828.55	13621.8	478.449	2596.82	2563.07	19260.1	5518.94	368.389	240.968	1455.63	7583.93	5706.47	397.692	235.674	1502.85	7842.69
ath-miR166g	8998.47	273.823	1132.23	2396.91	12801.4	19171.9	511.907	1718.26	5079.22	26481.3	6541.63	352.849	1402.21	1531.86	9828.55	13621.8	478.449	2596.82	2563.07	19260.1	5518.94	368.389	240.968	1455.63	7583.93	5706.47	397.692	235.674	1502.85	7842.69
ath-miR167a-3p	0	0	0	0	0	0	0	0	0	0	0.1828	0	0	0	0.1828	0.0950939	0.0633959	0	0	0.15849	0.077085	0	0	0	0.077085	0.168419	0	0	0	0.168419
ath-miR167a-5p	1080.26	3.56607	633.232	158.69	1875.75	985.402	1.25643	559.831	127.438	1673.93	507.498	15.1724	489.035	79.198	1090.9	708.101	33.4731	1130.67	142.039	2014.28	274.538	29.909	461.623	89.6498	855.72	286.817	30.6522	493.298	98.9178	909.685
ath-miR167b	1080.26	3.56607	633.232	158.69	1875.75	985.402	1.25643	559.831	127.438	1673.93	507.498	15.1724	489.035	79.198	1090.9	708.101	33.4731	1130.67	142.039	2014.28	274.538	29.909	461.623	89.6498	855.72	286.817	30.6522	493.298	98.9178	909.685
ath-miR167c-3p	1064.98	0	12.4812	132.709	1210.17	513.343	0.17949	8.43605	74.668	596.627	16.2235	0	5.3012	2.8334	24.3581	29.2255	0	6.05431	4.02564	39.3055	7.05327	0.0385425	0.61668	1.50316	9.21165	5.55781	0	0.673674	0.785953	7.01744
ath-miR167c-5p	2.54719	0.764158	2.54719	7.64158	13.5001	3.58981	0.717962	3.23083	4.48726	12.0259	1.4167	0.0457	1.0968	1.0968	3.656	2.34565	0.31698	3.96225	3.42338	10.0483	1.5417	0.192712	1.15627	1.42607	4.31675	2.02102	0.224558	1.45963	1.57191	5.27712
ath-miR167d	63.1704	1.78304	676.789	166.586	908.328	33.0262	1.97439	579.575	128.156	742.732	11.2879	2.2393	496.302	74.9936	584.823	18.6384	3.99394	1142.24	132.085	1296.96	14.1836	6.24388	465.593	77.2006	563.221	17.5717	5.33325	498.238	87.1847	608.328
ath-miR168a-3p	34.6418	0.509439	6.11326	2.80191	44.0664	30.5134	1.25643	2.51287	3.94879	38.2315	0.3199	0	0	0	0.3199	0.824147	0	0.412074	0.031698	1.26792	0.46251	0	0.077085	0.0385425	0.578137	0.617535	0	0.0561395	0.112279	0.785953
ath-miR168a-5p	1431.52	34.1324	333.173	278.408	2077.23	1613.98	35.7186	330.262	256.492	2236.45	187.004	10.2825	60.5067	46.157	303.95	478.481	22.3471	143.402	104.508	748.738	59.5096	4.70218	19.0785	17.5754	100.866	52.9396	4.71572	15.4945	15.1577	88.3075
ath-miR168b-3p	2.80191	0.254719	0	0	3.05663	0.717962	0	0	0	0.717962	0	0	0	0	0	0.221886	0	0	0	0.221886	0.0385425	0	0	0.077085	0.115627	0	0	0	0	0
ath-miR168b-5p	1431.52	34.1324	333.173	278.408	2077.23	1613.98	35.7186	330.262	256.492	2236.45	187.004	10.2825	60.5067	46.157	303.95	478.481	22.3471	143.402	104.508	748.738	59.5096	4.70218	19.0785	17.5754	100.866	52.9396	4.71572	15.4945	15.1577	88.3075
ath-miR169a-3p	0	0	0	0	0	0	0	0	0	0	0	0	0	0	0	0	0	0	0	0	0	0	0	0	0	0	0	0	0	0
ath-miR169a-5p	0	0	0.254719	0.764158	1.01888	0	0	0.717962	0.717962	1.43592	0.0913999	0.0457	0.0457	0.2742	0.457	0.0633959	0.031698	0.190188	0.126792	0.412074	0.192712	0.0385425	0.077085	0.115627	0.423967	0.112279	0.0561395	0.280698	0.0561395	0.505256
ath-miR169b-3p	0	0	0	0	0	0	0	0	0	0	0	0	0	0	0	0	0	0	0	0	0	0	0	0	0	0	0	0	0	0
ath-miR169b-5p	0	0	0.254719	0.764158	1.01888	0	0	0.717962	0.717962	1.43592	0	0	0.0457	0.2742	0.3199	0	0	0.190188	0.15849	0.348678	0	0	0.077085	0.15417	0.231255	0	0	0.280698	0.0561395	0.336838
ath-miR169c	0	0	0.254719	0.764158	1.01888	0	0	0.717962	0.717962	1.43592	0	0	0.0457	0.2742	0.3199	0	0	0.190188	0.15849	0.348678	0	0	0.077085	0.15417	0.231255	0	0	0.280698	0.0561395	0.336838
ath-miR169d	0	0	0	0	0	0	0	0	0.17949	0.17949	0	0	0	0	0	0	0	0	0	0	0	0	0.077085	0	0.077085	0	0	0	0	0
ath-miR169e	0	0	0	0	0	0	0	0	0.17949	0.17949	0	0	0	0	0	0	0	0	0	0	0	0	0.077085	0	0.077085	0	0	0	0	0
ath-miR169f-3p	0.254719	0	0	0	0.254719	0	0	0	0	0	0	0	0	0	0	0	0	0	0	0	0.0385425	0	0	0	0.0385425	0	0	0	0	0
ath-miR169f-5p	0	0	0	0	0	0	0	0	0.17949	0.17949	0	0	0	0	0	0	0	0	0	0	0	0	0.077085	0	0.077085	0	0	0	0	0
ath-miR169g-3p	0	0	0	0	0	0	0	0	0	0	0	0	0	0	0	0	0	0	0	0	0	0	0	0	0	0	0	0	0	0
ath-miR169g-5p	0	0	0	0	0	0	0	0	0.17949	0.17949	0	0	0	0	0	0	0	0	0	0	0	0	0.077085	0	0.077085	0	0	0	0	0
ath-miR169h	0	0	0.254719	1.01888	1.2736	0.17949	0	0.717962	0.897452	1.7949	0	0	0	0.0913999	0.0913999	0	0	0.190188	0.31698	0.507168	0.115627	0	0.077085	0.231255	0.423967	0	0.112279	0.112279	0.168419	0.392977
ath-miR169i	0	0	0.254719	1.01888	1.2736	0.17949	0	0.717962	0.897452	1.7949	0	0	0	0.0913999	0.0913999	0	0	0.190188	0.31698	0.507168	0.115627	0	0.077085	0.231255	0.423967	0	0.112279	0.112279	0.168419	0.392977
ath-miR169j	0	0	0.254719	1.01888	1.2736	0.17949	0	0.717962	0.897452	1.7949	0	0	0	0.0913999	0.0913999	0	0	0.190188	0.31698	0.507168	0.115627	0	0.077085	0.231255	0.423967	0	0.112279	0.112279	0.168419	0.392977
ath-miR169k	0	0	0.254719	1.01888	1.2736	0.17949	0	0.717962	0.897452	1.7949	0	0	0	0.0913999	0.0913999	0	0	0.190188	0.31698	0.507168	0.115627	0	0.077085	0.231255	0.423967	0	0.112279	0.112279	0.168419	0.392977
ath-miR169l	0	0	0.254719	1.01888	1.2736	0.17949	0	0.717962	0.897452	1.7949	0	0	0	0.0913999	0.0913999	0	0	0.190188	0.31698	0.507168	0.115627	0	0.077085	0.231255	0.423967	0	0.112279	0.112279	0.168419	0.392977
ath-miR169m	0	0	0.254719	1.01888	1.2736	0.17949	0	0.717962	0.897452	1.7949	0	0	0	0.0913999	0.0913999	0	0	0.190188	0.31698	0.507168	0.115627	0	0.077085	0.231255	0.423967	0	0.112279	0.112279	0.168419	0.392977
ath-miR169n	0	0	0.254719	1.01888	1.2736	0.17949	0	0.717962	0.897452	1.7949	0	0	0	0.0913999	0.0913999	0	0	0.190188	0.31698	0.507168	0.115627	0	0.077085	0.231255	0.423967	0	0.112279	0.112279	0.168419	0.392977
ath-miR170-3p	0	0	0	0	0	0.358981	0	0.17949	0	0.538471	0.1371	0	0.1371	0.0913999	0.3656	0.348678	0.0633959	0.253584	0.126792	0.79245	1.15627	0.0385425	0.192712	0.15417	1.54169	1.74032	0.0561395	0.392977	0.168419	2.35786
ath-miR170-5p	34.3871	1.01888	35.406	9.93405	80.746	70.5397	1.61541	61.5652	9.87197	143.592	28.0141	1.0054	16.2692	3.5646	48.8533	60.5114	1.36301	31.8248	5.54715	99.2464	23.0869	1.50316	8.28663	3.0834	35.9601	18.8067	1.12279	8.14023	3.36837	31.4381
ath-miR171a-3p	4.07551	0	2.03775	0.764158	6.87742	3.7693	0	1.7949	1.25643	6.82063	4.7071	0.0913999	4.4786	0.913999	10.1911	9.66788	0.665657	7.98789	1.87018	20.1916	11.5627	0.693765	4.39384	2.23546	18.8858	14.8208	0.785953	4.04204	2.58242	22.2312
ath-miR171a-5p	34.3871	1.01888	35.406	9.93405	80.746	70.5397	1.61541	61.5652	9.87197	143.592	28.0141	1.0054	16.2692	3.5646	48.8533	60.5114	1.36301	31.8248	5.54715	99.2464	23.0869	1.50316	8.28663	3.0834	35.9601	18.8067	1.12279	8.14023	3.36837	31.4381
ath-miR171b-3p	29.2927	1.78304	7.64158	9.1699	47.8872	24.5902	1.25643	4.66675	7.00013	37.5135	2.1022	0.731199	2.9248	0.822599	6.5808	5.99092	1.71169	7.44902	2.72603	17.8777	2.62089	1.61878	2.11984	3.12194	9.48145	3.87363	2.97539	2.30172	3.70521	12.8559
ath-miR171b-5p	0.509439	0	0	0	0.509439	0.538471	0	0	0	0.538471	0.2742	0	0	0	0.2742	0.380376	0	0.031698	0	0.412074	0	0	0	0	0	0	0	0	0	0
ath-miR171c-3p	29.2927	1.78304	7.64158	9.1699	47.8872	24.5902	1.25643	4.66675	7.00013	37.5135	2.1022	0.731199	2.9248	0.822599	6.5808	5.99092	1.71169	7.44902	2.72603	17.8777	2.62089	1.61878	2.11984	3.12194	9.48145	3.87363	2.97539	2.30172	3.70521	12.8559
ath-miR171c-5p	0.254719	0	0	0	0.254719	0.538471	0	0	0	0.538471	0.0457	0	0.0913999	0	0.1371	0.0633959	0	0.0950939	0.031698	0.190188	0	0	0	0	0	0	0	0	0	0
ath-miR172a	2.03775	1.78304	0	0.509439	4.33023	3.7693	1.7949	0.17949	0.897452	6.64114	3.6103	0.639799	0.1371	0.685499	5.0727	5.13507	0.760751	0.443772	0.729053	7.06865	4.70218	0.963562	0.346882	1.0021	7.01472	5.61395	1.17893	0.673674	1.40349	8.87004
ath-miR172b-3p	2.03775	1.78304	0	0.509439	4.33023	3.7693	1.7949	0.17949	0.897452	6.64114	3.6103	0.639799	0.1371	0.685499	5.0727	5.13507	0.760751	0.443772	0.729053	7.06865	4.70218	0.963562	0.346882	1.0021	7.01472	5.61395	1.17893	0.673674	1.40349	8.87004
ath-miR172b-5p	0	0	0	0	0	0	0	0	0	0	0	0	0	0	0	0	0	0	0	0	0	0	0	0	0	0	0	0	0	0
ath-miR172c	0	0	0	0.509439	0.509439	0.17949	0.17949	0.17949	0.538471	1.07694	0.1828	0	0.1371	0.594099	0.913999	0.221886	0	0.443772	0.633959	1.29962	0.077085	0.115627	0.346882	0.732307	1.2719	0.0561395	0.0561395	0.673674	1.12279	1.90874
ath-miR172d-3p	0	0	0	0.509439	0.509439	0.17949	0.17949	0.17949	0.538471	1.07694	0.1828	0	0.1371	0.594099	0.913999	0.221886	0	0.443772	0.633959	1.29962	0.077085	0.115627	0.346882	0.732307	1.2719	0.0561395	0.0561395	0.673674	1.12279	1.90874
ath-miR172d-5p	0	0	0	0	0	0	0	0	0	0	0	0	0	0	0	0	0	0	0	0	0	0	0	0	0	0	0	0	0	0
ath-miR172e-3p	0	0	0	0	0	0.538471	0	0	0	0.538471	0.0457	0.0457	0.0457	0	0.1371	0.0950939	0	0	0.031698	0.126792	0.231255	0.0385425	0	0.0385425	0.30834	0.112279	0	0.0561395	0	0.168418
ath-miR172e-5p	0	0	0	0	0	0	0	0	0	0	0	0	0	0	0	0	0	0	0	0	0	0	0	0	0	0	0	0	0	0
ath-miR173-3p	0.254719	0	12.4812	4.33023	17.0661	0.17949	0	5.20522	1.97439	7.3591	0.0457	0	0.5484	0.3199	0.914	0.0633959	0	1.33131	0.538866	1.93357	0	0	0.231255	0.077085	0.30834	0.0561395	0.0561395	0.505256	0.224558	0.842093
ath-miR173-5p	83.8027	4.07551	13.5001	30.5663	131.945	89.0272	1.7949	13.4618	20.8209	125.105	52.3265	0.639799	22.6215	5.6668	81.2546	127.236	1.45811	65.6465	11.2211	205.562	46.2124	2.04275	20.4275	6.8991	75.5817	42.2169	2.18944	17.9085	6.17535	68.4902
ath-miR1886.1	0.764158	0	0.254719	0.254719	1.2736	0.897452	0	0	0	0.897452	0	0	0	0	0	0.348678	0	0.0950939	0	0.443772	0.0385425	0	0	0	0.0385425	0.0561395	0	0	0	0.0561395
ath-miR1886.2	4.83967	0	0	1.52832	6.36799	7.5386	0.17949	1.07694	0.717962	9.51299	0.959699	0.0457	0.1828	0.2285	1.4167	2.25056	0.15849	0.919241	0.126792	3.45508	2.65943	0.077085	0.46251	0.30834	3.50737	2.18944	0.112279	0.561395	0.280698	3.14381
ath-miR1886.3	0	0	0	0	0	0	0	0	0	0	0	0	0	0	0	0	0	0	0	0	0	0	0	0	0	0	0	0	0	0
ath-miR1888a	7.64158	8.40574	13.2454	2.29247	31.5852	10.7694	7.5386	15.0772	3.94879	37.334	1.5995	0.5484	1.0968	0.1371	3.3818	3.61357	0.602261	2.31395	1.10943	7.63921	1.69587	0.46251	0.46251	0.346882	2.96777	2.02102	0.449116	0.617535	0.336837	3.42451
ath-miR1888b	0	0.254719	1.52832	0	1.78304	0.358981	0.17949	0.538471	1.25643	2.33337	0	0	0	0	0	0.0950939	0.031698	0.0950939	0.031698	0.253584	0.077085	0	0.0385425	0.0385425	0.15417	0.0561395	0	0	0	0.0561395
ath-miR2111a-3p	0	0	0	0	0	0	0	0	0	0	0	0	0	0	0	0	0	0	0	0	0.077085	0	0	0	0.077085	0	0	0	0	0
ath-miR2111a-5p	0	0	0	0	0	0	0	0	0	0	0	0	0.0913999	0	0.0913999	0	0	0.031698	0	0.031698	0	0	0.0385425	0.0385425	0.077085	0.0561395	0	0	0	0.0561395
ath-miR2111b-3p	0	0	0	0	0	0	0	0	0	0	0	0	0	0	0	0.0633959	0	0	0	0.0633959	0.0385425	0	0	0	0.0385425	0	0	0	0	0
ath-miR2111b-5p	0	0	0	0	0	0	0	0	0	0	0	0	0.0913999	0	0.0913999	0	0	0.031698	0	0.031698	0	0	0.0385425	0.0385425	0.077085	0.0561395	0	0	0	0.0561395
ath-miR2112-3p	0	0	0	0.764158	0.764158	0.538471	0	0	0	0.538471	0	0	0	0.0457	0.0457	0.031698	0	0.031698	0.031698	0.095094	0.192712	0	0	0	0.192712	0.168419	0.0561395	0.0561395	0.112279	0.392977
ath-miR2112-5p	0	0	0	0	0	0	0	0	0	0	0	0	0	0	0	0	0	0	0	0	0	0	0	0	0	0	0	0	0	0
ath-miR2933a	0	0	0	0	0	0	0	0	0	0	0	0	0	0	0	0	0	0	0	0	0	0	0	0	0	0	0	0	0	0
ath-miR2933b	0	0	0	0	0	0	0	0	0	0	0	0	0	0	0	0	0	0	0	0	0	0	0	0	0	0	0	0	0	0
ath-miR2934-3p	0	0	0	0	0	0	0	0	0	0	0	0	0	0	0	0.0633959	0	0	0	0.0633959	0	0	0	0	0	0	0	0	0	0
ath-miR2934-5p	0.254719	0	0	0	0.254719	0.17949	0	0	0.17949	0.35898	0.0457	0	0	0	0.0457	0.031698	0	0	0	0.031698	0.077085	0	0	0	0.077085	0.0561395	0	0	0	0.0561395
ath-miR2936	0	0	0	0	0	0	0	0	0	0	0	0.0457	0	0	0.0457	0	0	0	0	0	0	0	0	0	0	0	0	0	0	0
ath-miR2939	0	0	0	0	0	0	0	0	0	0	0	0	0	0	0	0	0	0	0	0	0	0	0	0	0	0	0	0	0	0
ath-miR319a	405.513	406.023	145.699	617.185	1574.42	727.834	806.809	144.31	1033.33	2712.28	76.3189	60.6438	46.9796	61.7863	245.729	154.274	114.525	86.8841	128.821	484.504	112.274	69.6077	17.9223	58.6617	258.466	121.205	75.6199	19.7611	69.5007	286.087
ath-miR319b	405.513	406.023	145.699	617.185	1574.42	727.834	806.809	144.31	1033.33	2712.28	76.3189	60.6438	46.9796	61.7863	245.729	154.274	114.525	86.8841	128.821	484.504	112.274	69.6077	17.9223	58.6617	258.466	121.205	75.6199	19.7611	69.5007	286.087
ath-miR319c	66.4817	89.4065	47.3778	4613.73	4817	70.5397	238.902	54.7446	10414.4	10778.6	16.1321	8.27169	33.5438	399.235	457.183	23.8052	14.3592	58.0073	784.018	880.19	14.6847	4.74072	7.13036	209.748	236.304	15.7191	5.83851	8.25251	231.968	261.778
ath-miR3434-3p	0	0	0	0	0	0	0	0	0	0	0	0	0	0	0	0	0	0	0	0	0	0	0	0	0	0	0	0	0	0
ath-miR3434-5p	0	0	0	0	0	0	0	0	0	0	0	0	0	0	0	0	0	0	0	0	0	0	0	0	0	0	0	0	0	0
ath-miR3440b-3p	7.64158	0	1.2736	2.54719	11.4624	5.02573	0	0.17949	0.358981	5.5642	0.457	0	0.0457	0.1371	0.6398	1.07773	0.0633959	0.0950939	0.0950939	1.33131	0.077085	0	0.0385425	0.077085	0.192713	0.336837	0.0561395	0	0.112279	0.505255
ath-miR3440b-5p	0	0	0	0	0	0.17949	0	0	0	0.17949	0.1828	0	0.0457	0	0.2285	0.348678	0	0.031698	0	0.380376	0.192712	0	0	0.0385425	0.231255	0.168419	0	0	0	0.168419
ath-miR390a-3p	34.8965	0	17.3209	3.82079	56.0382	24.2312	0	12.3848	1.7949	38.4109	0.685499	0	0.5484	0.1371	1.371	2.44074	0	1.5849	0.190188	4.21583	0.346882	0	0.115627	0.077085	0.539594	0.112279	0.0561395	0.168419	0.0561395	0.392977
ath-miR390a-5p	5.60382	0	0.509439	0.764158	6.87742	3.58981	0	0.897452	0.538471	5.02573	2.8334	0.1371	0.5027	0.868299	4.3415	6.56148	0.221886	1.20452	0.887543	8.87543	3.70008	0.077085	0.115627	1.11773	5.01052	5.05256	0	0.336837	1.34735	6.73675
ath-miR390b-3p	0	0	1.52832	1.52832	3.05664	0.358981	0	0.717962	1.7949	2.87184	0	0	0.2285	0.1371	0.3656	0	0	0.570564	0.0633959	0.63396	0	0	0.077085	0.0385425	0.115627	0	0	0.0561395	0	0.0561395
ath-miR390b-5p	5.60382	0	0.509439	0.764158	6.87742	3.58981	0	0.897452	0.538471	5.02573	2.8334	0.1371	0.5027	0.868299	4.3415	6.56148	0.221886	1.20452	0.887543	8.87543	3.70008	0.077085	0.115627	1.11773	5.01052	5.05256	0	0.336837	1.34735	6.73675
ath-miR391-3p	0	0	0	0	0	0	0	0	0	0	0	0	0	0	0	0	0	0.0633959	0	0.0633959	0	0	0	0	0	0	0	0	0	0
ath-miR391-5p	4.83967	0	1.01888	1.78304	7.64159	10.4104	0	3.94879	2.33338	16.6926	3.6103	0.0457	1.371	0.3199	5.3469	10.4286	0.15849	2.34565	1.23622	14.169	9.44291	0.30834	1.2719	1.11773	12.1409	10.1613	0.168419	1.45963	1.90874	13.6981
ath-miR3932a	0	0	0	0	0	0	0	0	0	0	0	0	0	0	0	0	0	0	0	0	0	0	0	0	0	0	0	0	0	0
ath-miR3932b-3p	0	0	0	0	0	0	0	0	0	0	0	0	0	0	0	0	0	0	0	0	0	0	0	0	0	0	0	0	0	0
ath-miR3932b-5p	2399.46	6.87742	34.6418	284.521	2725.5	3271.39	11.4874	50.6163	444.059	3777.55	81.3459	0.1371	4.7985	11.5621	97.8436	214.056	0.47547	10.4603	21.8082	246.8	31.1809	0.346882	1.07919	6.24388	38.8509	27.3399	0.224558	0.561395	6.73674	34.8626
ath-miR3933	0	0	0	0	0	0	0	0	0	0	0	0	0	0	0	0	0	0	0	0	0	0	0	0	0	0	0	0	0	0
ath-miR393a-3p	0.764158	0	0	0	0.764158	1.07694	0	0	0.17949	1.25643	0.0457	0	0	0	0.0457	0.126792	0	0.031698	0.031698	0.190188	0.0385425	0	0	0	0.0385425	0.168419	0	0	0	0.168419
ath-miR393a-5p	8.15102	0	52.9816	13.5001	74.6327	3.7693	0	31.9493	9.87197	45.5906	0.457	0.0457	3.0619	0.913999	4.4786	0.792449	0.0950939	5.89582	1.77509	8.55845	0.231255	0.15417	6.8991	1.46461	8.74914	0.280698	0.224558	7.242	2.02102	9.76828
ath-miR393b-3p	50.1797	0.764158	3.82079	4.58495	59.3496	40.0264	1.7949	1.61541	3.05134	46.4881	5.3926	0.2285	0.3199	1.0968	7.0378	9.63618	0.348678	0.633959	0.729053	11.3479	3.85425	0.115627	0.385425	0.77085	5.12615	3.53679	0.168419	0.0561395	0.785953	4.5473
ath-miR393b-5p	8.15102	0	52.9816	13.5001	74.6327	3.7693	0	31.9493	9.87197	45.5906	0.457	0.0457	3.0619	0.913999	4.4786	0.792449	0.0950939	5.89582	1.77509	8.55845	0.231255	0.15417	6.8991	1.46461	8.74914	0.280698	0.224558	7.242	2.02102	9.76828
ath-miR394a	44.0664	1.52832	1.52832	11.7171	58.8401	47.565	1.25643	1.07694	12.7438	62.6422	65.2138	0.913999	1.0968	12.9331	80.1577	125.682	2.02867	2.18716	19.3358	149.234	81.5173	1.8115	1.11773	20.6973	105.144	114.132	3.08767	1.40349	27.7891	146.412
ath-miR394b-3p	0	0	0	0	0	0	0	0	0	0	0	0	0	0	0	0	0	0	0	0	0	0	0	0	0	0	0	0	0	0
ath-miR394b-5p	44.0664	1.52832	1.52832	11.7171	58.8401	47.565	1.25643	1.07694	12.7438	62.6422	65.2138	0.913999	1.0968	12.9331	80.1577	125.682	2.02867	2.18716	19.3358	149.234	81.5173	1.8115	1.11773	20.6973	105.144	114.132	3.08767	1.40349	27.7891	146.412
ath-miR395a	1465.15	1.2736	22.9247	139.586	1628.93	878.785	0.717962	23.3338	93.8735	996.71	73.6226	0.3199	2.6963	8.95719	85.596	230.793	1.64829	6.81506	17.9728	257.229	27.4422	0.539595	1.15627	2.8136	31.9517	26.554	0.561395	1.29121	3.48065	31.8873
ath-miR395b	3166.42	28.2738	25.2172	295.984	3515.89	2140.06	21.0004	24.7697	227.055	2412.89	79.7464	1.371	2.4221	12.4761	96.0156	229.747	3.55017	6.2762	23.2663	262.84	10.9461	0.423967	0.886477	2.46672	14.7233	10.6104	0.0561395	0.505256	2.18944	13.3612
ath-miR395c	3166.42	28.2738	25.2172	295.984	3515.89	2140.06	21.0004	24.7697	227.055	2412.89	79.7464	1.371	2.4221	12.4761	96.0156	229.747	3.55017	6.2762	23.2663	262.84	10.9461	0.423967	0.886477	2.46672	14.7233	10.6104	0.0561395	0.505256	2.18944	13.3612
ath-miR395d	1465.15	1.2736	22.9247	139.586	1628.93	878.785	0.717962	23.3338	93.8735	996.71	73.6226	0.3199	2.6963	8.95719	85.596	230.793	1.64829	6.81506	17.9728	257.229	27.4422	0.539595	1.15627	2.8136	31.9517	26.554	0.561395	1.29121	3.48065	31.8873
ath-miR395e	1465.15	1.2736	22.9247	139.586	1628.93	878.785	0.717962	23.3338	93.8735	996.71	73.6226	0.3199	2.6963	8.95719	85.596	230.793	1.64829	6.81506	17.9728	257.229	27.4422	0.539595	1.15627	2.8136	31.9517	26.554	0.561395	1.29121	3.48065	31.8873
ath-miR395f	3166.42	28.2738	25.2172	295.984	3515.89	2140.06	21.0004	24.7697	227.055	2412.89	79.7464	1.371	2.4221	12.4761	96.0156	229.747	3.55017	6.2762	23.2663	262.84	10.9461	0.423967	0.886477	2.46672	14.7233	10.6104	0.0561395	0.505256	2.18944	13.3612
ath-miR396a-3p	529.816	0.764158	113.86	27.7644	672.205	215.209	0.358981	61.0267	10.0515	286.646	11.9277	0.5484	5.484	1.7366	19.6967	18.2263	0.507168	9.73128	1.90188	30.3666	7.32307	0.269797	3.50737	1.04065	12.1409	4.65958	0	1.90874	0.842093	7.41041
ath-miR396a-5p	280.955	4.33023	3114.2	1344.15	4743.64	159.029	6.46166	3317.7	1623.85	5107.04	52.1894	3.6103	428.529	255.965	740.294	93.6992	6.2762	997.567	493.062	1590.6	69.839	6.93765	297.201	259.892	633.87	89.0934	7.35428	321.006	288.22	705.674
ath-miR396b-3p	95.5197	1.01888	22.67	6.6227	125.831	44.1546	0.358981	10.0515	3.23083	57.7959	7.22059	0.2285	2.3764	0.776899	10.6024	11.1577	0.190188	3.80376	1.14113	16.2928	6.1668	0.269797	1.77295	0.77085	8.9804	4.88414	0.392977	1.45963	0.561395	7.29814
ath-miR396b-5p	10751.2	76.1611	3114.2	1797.04	15738.6	13091.9	84.7195	3317.7	2173.45	18667.8	2041.01	23.7183	428.529	300.386	2793.64	4836	50.5583	997.567	593.703	6477.83	1580.94	40.5081	297.201	329.345	2247.99	1573.98	41.9924	321.006	359.181	2296.16
ath-miR397a	1.2736	0	1.52832	9.42461	12.2265	0	0	2.15389	10.231	12.3849	0.0457	0	1.8737	1.2796	3.199	0.380376	0.0633959	4.18413	4.15243	8.78033	0.539595	0.15417	1.04065	2.65943	4.39384	0.954372	0.168419	1.29121	3.08767	5.50167
ath-miR397b	5.34911	0	0	3.82079	9.1699	4.66675	0	0.717962	2.87185	8.25656	0.5027	0.0457	0.3199	0.3656	1.2339	1.20452	0.221886	0.697355	0.412074	2.53584	2.11984	0.423967	1.23336	0.578137	4.3553	2.414	0.617535	1.34735	1.12279	5.50167
ath-miR398a-3p	279.682	2.29247	252.682	3125.66	3660.32	336.186	2.15389	224.722	4224.49	4787.55	36.6057	0.1371	37.2455	284.391	358.379	49.9877	0.285282	74.7438	454.644	579.661	23.7422	0.61668	28.0975	217.187	269.643	35.9293	0.954372	29.8101	311.013	377.707
ath-miR398a-5p	0	0	0	0	0	0	0	0	0	0	0	0	0	0	0	0	0	0	0	0	0	0	0	0	0	0	0	0	0	0
ath-miR398b-3p	45068	9.42461	252.682	3123.88	48454	58606.1	9.3335	224.722	4221.08	63061.2	3144.07	2.7877	37.2455	284.482	3468.59	6770.62	3.42338	74.7438	454.834	7303.62	2139.45	3.46882	28.0975	215.568	2386.58	2765.43	5.55781	29.8101	309.441	3110.24
ath-miR398b-5p	0	0	0	0	0	0	0	0	0	0	0.0457	0	0	0	0.0457	0.0633959	0	0	0	0.0633959	0.0385425	0	0	0	0.0385425	0	0	0	0	0
ath-miR398c-3p	45068	9.42461	252.682	3123.88	48454	58606.1	9.3335	224.722	4221.08	63061.2	3144.07	2.7877	37.2455	284.482	3468.59	6770.62	3.42338	74.7438	454.834	7303.62	2139.45	3.46882	28.0975	215.568	2386.58	2765.43	5.55781	29.8101	309.441	3110.24
ath-miR398c-5p	0	0	0	0	0	0	0	0	0	0	0.0457	0	0	0	0.0457	0.0633959	0	0	0	0.0633959	0.0385425	0	0	0	0.0385425	0	0	0	0	0
ath-miR399a	0.764158	0	0	0	0.764158	0.17949	0	0.17949	0.17949	0.53847	0.1828	0.0457	0	0	0.2285	0.665657	0	0.031698	0.0950939	0.792449	0.192712	0.0385425	0.0385425	0.077085	0.346882	0.224558	0	0.0561395	0.112279	0.392977
ath-miR399b	50.9439	0	0.254719	3.05663	54.2552	68.7448	0.358981	0.717962	8.07707	77.8988	10.3282	0.1371	0.1371	1.4624	12.0648	20.1599	0.15849	0.507168	1.99697	22.8225	8.74914	0.192712	0.385425	1.92712	11.2544	7.29814	0.0561395	0.561395	1.29121	9.20688
ath-miR399c-3p	50.9439	0	0.254719	3.05663	54.2552	68.7448	0.358981	0.717962	8.07707	77.8988	10.3282	0.1371	0.1371	1.4624	12.0648	20.1599	0.15849	0.507168	1.99697	22.8225	8.74914	0.192712	0.385425	1.92712	11.2544	7.29814	0.0561395	0.561395	1.29121	9.20688
ath-miR399c-5p	0	0	0	0	0	0	0	0	0	0	0	0	0	0	0	0	0	0	0	0	0	0	0	0	0	0	0	0	0	0
ath-miR399d	0.509439	0	0	0	0.509439	0	0	0.17949	0.17949	0.35898	0	0	0	0	0	0.253584	0.031698	0.0633959	0.0950939	0.443772	0.115627	0	0.0385425	0.115627	0.269796	0.392977	0.112279	0.0561395	0.168419	0.729815
ath-miR399e	0	0	0.254719	0	0.254719	0	0	0	0.17949	0.17949	0	0	0	0	0	0	0	0.031698	0.031698	0.063396	0	0.077085	0	0.077085	0.15417	0	0	0	0.0561395	0.0561395
ath-miR399f	0	0	0	0	0	0	0	0.17949	0.17949	0.35898	0.0457	0	0	0	0.0457	0.126792	0	0.0633959	0.031698	0.221886	0.231255	0.0385425	0.0385425	0.077085	0.385425	0.280698	0	0.0561395	0.0561395	0.392977
ath-miR400	0	0	0	2.29247	2.29247	0.538471	0	0	0.717962	1.25643	0	0	0.2742	0	0.2742	0.348678	0.0633959	0.15849	0.0633959	0.63396	0.231255	0.0385425	0.231255	0.115627	0.61668	0.336837	0.112279	0.168419	0.168419	0.785954
ath-miR402	0.764158	0	1.78304	20.887	23.4342	0.17949	0	1.61541	20.2824	22.0773	0.0457	0	0.5484	1.4167	2.0108	0.0950939	0	0.570564	2.66263	3.32829	0.077085	0	0.0385425	1.2719	1.38753	0	0	0.0561395	1.17893	1.23507
ath-miR403-3p	1743.55	118.699	267.455	1336.77	3466.47	1368.26	83.463	299.749	1206.53	2958	161.504	17.7316	59.6841	117.312	356.232	420.886	34.5191	155.066	241.253	851.724	185.505	24.8214	56.5033	172.015	438.845	203.225	26.947	57.2623	217.316	504.75
ath-miR403-5p	57.0571	6.36798	9.93405	6.6227	79.9818	47.206	6.10267	8.07707	5.02573	66.4115	12.7503	0.1828	3.9302	0.868299	17.7316	24.5659	0.697355	7.57582	1.45811	34.2972	12.8346	0.46251	1.85004	1.04065	16.1878	11.8454	0.168419	0.898232	0.898232	13.8103
ath-miR404	0	0	0	0	0	0	0	0	0	0	0	0	0	0.2285	0.2285	0	0	0	0.126792	0.126792	0	0	0	0.269797	0.269797	0	0	0	0.224558	0.224558
ath-miR406	0	0	0	0	0	0	0	0	0	0	0	0	0	0.0457	0.0457	0	0	0	0	0	0	0	0	0.077085	0.077085	0	0	0	0	0
ath-miR408-3p	14063.8	0.764158	203.011	1756.54	16024.1	14072.8	0.538471	220.414	2050.86	16344.6	821.777	2.3764	28.3797	135.455	987.988	1694.07	2.50414	62.6352	204.389	1963.6	340.561	2.58235	11.0617	65.4451	419.65	350.254	2.97539	10.7226	71.6902	435.642
ath-miR408-5p	2127.42	40.2457	256.248	157.162	2581.08	1027.4	20.4619	96.7453	70.7192	1215.33	93.5935	1.9651	12.1562	9.32279	117.038	210.538	3.61357	31.4761	16.6731	262.301	52.7647	1.50316	5.51157	6.35951	66.1389	52.0413	2.07716	6.28763	7.242	67.6481
ath-miR419	0	0	0	0	0	0	0	0	0	0	0	0	0	0	0	0	0	0	0	0	0	0	0	0.0385425	0.0385425	0	0	0	0	0
ath-miR4221	0	0	0	0	0	0.358981	0	0.17949	0.358981	0.897452	0.0913999	0	0.0457	0.0457	0.1828	0.126792	0	0.0633959	0	0.190188	0.077085	0	0.077085	0	0.15417	0	0	0	0	0
ath-miR4227	0	0	0	0	0	0	0	0	0	0	0	0	0	0.0457	0.0457	0	0	0	0	0	0	0	0	0	0	0	0	0	0.0561395	0.0561395
ath-miR4228-3p	2.29247	0	1.52832	0.509439	4.33023	1.61541	0	1.61541	0.897452	4.12827	0	0	0.0457	0	0.0457	0.221886	0	0.0950939	0.0950939	0.412074	0.077085	0	0.0385425	0.0385425	0.15417	0.0561395	0	0	0	0.0561395
ath-miR4228-5p	0	0	0	0	0	0	0	0	0	0	0	0	0	0.0457	0.0457	0	0	0	0	0	0	0	0	0	0	0	0	0	0	0
ath-miR4239	0	0	0	0	0	0	0	0	0	0	0	0	0	0	0	0	0	0	0	0	0	0	0	0	0	0	0	0	0	0
ath-miR4243	0	0	0	0	0	0	0	0	0	0	0	0	0	0	0	0	0.031698	0	0	0.031698	0	0	0	0.0385425	0.0385425	0	0	0	0	0
ath-miR4245	0	0	0	0	0	0	0	0	0	0	0.0457	0	0	0	0.0457	0	0	0	0	0	0	0	0	0	0	0	0	0	0	0
ath-miR447a-3p	147.992	6.6227	39.7362	43.0476	237.399	153.105	5.20522	50.7958	52.9497	262.056	7.63189	0.731199	7.90609	5.7582	22.0274	22.2203	1.42641	21.8716	10.2384	55.7567	2.46672	0.346882	1.50316	1.61878	5.93554	2.414	0.224558	1.68419	2.1333	6.45605
ath-miR447a.2-3p	72.595	35.6607	26.4908	12.9907	147.737	136.413	38.7699	32.3083	14.7182	222.209	9.59699	0.3199	2.4678	1.0511	13.4358	24.4074	1.01434	6.62488	2.63093	34.6775	18.3462	2.23546	2.04275	2.15838	24.7828	23.747	2.97539	1.90874	2.75084	31.382
ath-miR447b	147.992	6.6227	39.7362	43.0476	237.399	153.105	5.20522	50.7958	52.9497	262.056	7.63189	0.731199	7.90609	5.7582	22.0274	22.2203	1.42641	21.8716	10.2384	55.7567	2.46672	0.346882	1.50316	1.61878	5.93554	2.414	0.224558	1.68419	2.1333	6.45605
ath-miR447c-3p	0	0	0	0	0	0	0	0	0	0	0	0	0	0	0	0	0	0	0.031698	0.031698	0	0	0	0	0	0	0	0	0	0
ath-miR447c-5p	0	0	0	0	0	0	0	0	0	0	0	0	0	0	0	0	0	0	0	0	0	0	0	0	0	0	0	0	0	0
ath-miR472-3p	177.285	9.42461	29.038	30.0569	245.805	133.002	4.48726	14.7182	20.4619	172.669	14.3041	0.639799	2.3307	2.3307	19.6053	45.7085	1.36301	6.81506	6.3079	60.1945	16.5347	1.0021	1.88858	3.96988	23.3953	15.8313	0.729814	2.30172	3.19995	22.0628
ath-miR472-5p	0.254719	0	0.254719	0	0.509438	0	0	0	0	0	0.0457	0	0	0	0.0457	0.031698	0	0.031698	0	0.063396	0	0	0	0	0	0	0	0	0.0561395	0.0561395
ath-miR5012	9.1699	2.54719	2.29247	9.42461	23.4342	9.87197	2.15389	5.5642	10.5899	28.18	3.5646	0.0457	5.80389	0.776899	10.1911	6.14941	0	10.2384	2.37735	18.7652	3.16048	0.077085	0.501052	0.847935	4.58655	3.48065	0.168419	0.954372	1.45963	6.06307
ath-miR5013	0.254719	0	0	0	0.254719	0	0	0	0	0	0	0	0	0	0	0.031698	0	0	0	0.031698	0	0	0	0	0	0	0	0	0	0
ath-miR5014a-3p	0	0	0	0	0	0	0	0.17949	0	0.17949	0	0	0	0	0	0	0	0	0	0	0	0	0	0	0	0	0	0	0	0
ath-miR5014a-5p	0	0	0	0	0	0	0	0	0	0	0	0	0	0	0	0	0	0	0	0	0	0	0	0	0	0	0	0	0	0
ath-miR5014b	0	0	0	0	0	0	0	0	0	0	0	0	0	0	0	0	0	0	0	0	0	0	0	0	0	0	0	0	0	0
ath-miR5019	0	0	0	0	0	0	0	0	0	0	0	0	0	0	0	0.031698	0	0	0	0.031698	0	0	0	0	0	0	0	0	0	0
ath-miR5020a	0.254719	0	0.254719	0	0.509438	0	0	0	0	0	0	0	0	0	0	0	0	0	0	0	0	0	0	0	0	0	0	0	0	0
ath-miR5020b	0	0	0	0	0	0	0	0	0	0	0	0	0	0	0	0	0	0	0	0	0	0	0	0	0	0	0	0	0	0
ath-miR5020c	0	0	0.254719	0	0.254719	0	0	0	0.538471	0.538471	0	0	0	0	0	0	0	0	0	0	0	0	0	0	0	0	0	0	0	0
ath-miR5023	0	0	0	0	0	0	0	0	0	0	0	0	0	0	0	0	0	0.031698	0	0.031698	0	0	0	0	0	0	0	0	0	0
ath-miR5024-3p	30.821	0	3.56607	4.58495	38.972	32.1288	0.17949	3.05134	4.84624	40.2059	1.2339	0.0457	0.1828	0.3199	1.7823	3.42338	0.031698	0.31698	0.507168	4.27923	0.46251	0	0	0	0.46251	0.280698	0	0.0561395	0.0561395	0.392977
ath-miR5024-5p	0	0	0	0	0	0	0	0	0	0	0	0	0	0	0	0	0	0	0	0	0	0	0	0	0	0	0	0	0	0
ath-miR5026	233.832	0	2.80191	41.2645	277.898	246.979	0.358981	1.61541	31.0518	280.005	23.9925	0.2285	0.0913999	4.2501	28.5625	47.4836	0.253584	0.47547	7.41733	55.63	15.7639	0.15417	0.46251	3.96988	20.3505	18.0208	0.280698	0.505256	4.77186	23.5786
ath-miR5027	0	0	0	0	0	0	0	0	0.17949	0.17949	0	0	0	0	0	0	0	0	0	0	0.077085	0	0	0	0.077085	0	0	0	0	0
ath-miR5028	0	0	0.254719	0.254719	0.509438	0.538471	0.358981	0.17949	0.17949	1.25643	0.1371	0.0913999	0.0913999	0	0.3199	0.15849	0	0.15849	0.0633959	0.380376	0.0385425	0	0.115627	0	0.154169	0.168419	0.0561395	0.0561395	0	0.280698
ath-miR5029	0	0	0	0	0	0	0	0	0	0	0	0	0	0	0	0	0	0	0	0	0	0	0	0	0	0	0	0	0	0
ath-miR5595a	0.509439	0	0	0	0.509439	0.358981	0	0	0	0.358981	0.0457	0	0	0	0.0457	0.0633959	0	0	0.031698	0.0950939	0	0	0	0	0	0.0561395	0	0	0	0.0561395
ath-miR5629	1.2736	0	1.01888	0.764158	3.05664	0	0	0.897452	0	0.897452	0	0	0.0457	0.0457	0.0914	0.190188	0	0.190188	0.190188	0.570564	0.0385425	0.077085	0	0.077085	0.192713	0	0	0	0.112279	0.112279
ath-miR5631	0	0	0	0	0	0	0	0	0	0	0	0	0	0.0457	0.0457	0	0	0.126792	0	0.126792	0	0	0	0	0	0	0	0	0	0
ath-miR5632-3p	1.2736	0	0	0	1.2736	0	0	0.358981	0	0.358981	0	0	0	0	0	0.221886	0	0	0	0.221886	0	0	0	0	0	0	0	0	0	0
ath-miR5632-5p	0.254719	0	0	0	0.254719	0	0	0	0	0	0	0	0	0	0	0.126792	0.031698	0	0	0.15849	0.15417	0	0	0	0.15417	0	0	0	0.0561395	0.0561395
ath-miR5633	0	0	0	0	0	0	0	0	0	0	0	0	0	0	0	0	0	0	0	0	0.0385425	0	0	0	0.0385425	0	0	0	0	0
ath-miR5634	0	0	0	0	0	0	0	0	0	0	0	0	0	0	0	0	0	0	0	0	0	0	0	0	0	0	0	0	0	0
ath-miR5635a	0	0	0	0	0	0	0	0	0	0	0	0	0	0	0	0	0	0	0	0	0	0	0	0	0	0	0	0	0	0
ath-miR5635b	0	0	0	0	0	0	0	0	0	0	0	0	0	0	0	0	0	0	0	0	0	0	0	0	0	0	0	0	0	0
ath-miR5635c	0	0	0	0	0	0	0	0	0	0	0	0	0	0	0	0	0	0	0	0	0	0	0	0	0	0	0	0	0	0
ath-miR5635d	0	0	0	0	0	0	0	0	0	0	0	0	0	0	0	0	0	0	0	0	0	0	0	0	0	0	0	0	0	0
ath-miR5636	0	0	0	0	0	0	0	0	0	0	0	0	0	0	0	0	0	0	0	0	0	0	0	0	0	0	0	0	0	0
ath-miR5637	2.03775	0	0	0	2.03775	0.897452	0	0.358981	0.17949	1.43592	0.4113	0	0.0913999	0	0.5027	0.792449	0	0.253584	0	1.04603	0.346882	0	0	0.0385425	0.385425	0.392977	0	0	0	0.392977
ath-miR5638a	0.254719	0	0	0	0.254719	0	0	0	0	0	0	0	0	0	0	0	0	0	0	0	0.0385425	0	0	0	0.0385425	0	0	0	0	0
ath-miR5638b	0	0	0	0	0	0	0	0	0	0	0.0457	0	0	0.0457	0.0914	0.15849	0	0.031698	0.031698	0.221886	0	0.0385425	0	0	0.0385425	0	0	0	0	0
ath-miR5639-3p	0	0	0	0	0	0	0	0	0	0	0	0	0	0	0	0	0	0	0	0	0	0	0	0	0	0	0	0	0	0
ath-miR5639-5p	0	0	0	0	0	0.717962	0	0	0	0.717962	0.0913999	0	0	0	0.0913999	0.031698	0	0	0.031698	0.063396	0.0385425	0	0	0	0.0385425	0.0561395	0	0	0	0.0561395
ath-miR5640	0.764158	0	5.09439	2.03775	7.8963	0.538471	0	4.12828	3.58981	8.25656	0	0	0.2285	0.0457	0.2742	0.221886	0	0.919241	0.443772	1.5849	0.115627	0	0.077085	0	0.192712	0.112279	0	0.224558	0	0.336837
ath-miR5641	0.509439	0	0	0	0.509439	0.17949	0	0.17949	0	0.35898	0	0	0	0	0	0.031698	0	0	0.0633959	0.0950939	0	0	0	0	0	0	0	0.112279	0	0.112279
ath-miR5642a	1.01888	0.764158	0.254719	18.8492	20.887	1.7949	0.17949	1.97439	26.3851	30.3339	0.3656	0.685499	3.656	43.7806	48.4877	1.5849	1.45811	5.38866	107.995	116.427	0.501052	0.578137	0.732307	12.1023	13.9138	0.449116	0.505256	0.561395	13.4735	14.9893
ath-miR5642b	1.01888	0.764158	0.254719	18.8492	20.887	1.7949	0.17949	1.97439	26.3851	30.3339	0.3656	0.685499	3.656	43.7806	48.4877	1.5849	1.45811	5.38866	107.995	116.427	0.501052	0.578137	0.732307	12.1023	13.9138	0.449116	0.505256	0.561395	13.4735	14.9893
ath-miR5643a	0	0	0	0	0	0.538471	0	0	0	0.538471	0.0457	0	0	0	0.0457	0.0950939	0	0	0.031698	0.126792	0	0	0	0	0	0	0	0	0	0
ath-miR5643b	0	0	0	0	0	0.538471	0	0	0	0.538471	0.0457	0	0	0	0.0457	0.0950939	0	0	0.031698	0.126792	0	0	0	0	0	0	0	0	0	0
ath-miR5644	0	0	0	0	0	0.17949	0	0	0	0.17949	0	0	0	0	0	0	0	0	0	0	0	0	0	0	0	0	0	0	0	0
ath-miR5645a	0	0	0	0	0	0	0	0	0	0	0	0	0	0	0	0	0	0	0	0	0	0	0	0	0	0	0	0	0	0
ath-miR5645b	0	0	0	0	0	0	0	0	0	0	0	0	0	0	0	0	0	0	0	0	0	0	0	0	0	0	0	0	0	0
ath-miR5645c	0	0	0	0	0	0	0	0	0	0	0	0	0	0	0	0	0	0	0.031698	0.031698	0	0	0	0	0	0	0	0	0	0
ath-miR5645d	0	0	0	0	0	0	0	0	0	0	0	0	0	0	0	0	0	0	0	0	0	0	0	0	0	0	0	0	0	0
ath-miR5645e	0	0	0	0	0	0	0	0	0	0	0	0	0	0	0	0	0	0	0	0	0	0	0	0	0	0	0	0	0	0
ath-miR5645f	0	0	0	0	0	0	0	0	0	0	0	0	0	0	0	0	0	0	0	0	0	0	0	0	0	0	0	0	0	0
ath-miR5646	0	0	0	0	0	0	0	0	0	0	0	0	0	0	0	0	0	0	0	0	0	0	0	0	0	0	0	0	0	0
ath-miR5647	0	0	0.254719	0	0.254719	0	0	0	0.17949	0.17949	0	0	0.0457	0	0.0457	0	0	0.0950939	0.031698	0.126792	0	0	0	0.077085	0.077085	0	0	0	0	0
ath-miR5648-3p	0	0	0	0	0	0	0	0	0	0	0	0	0	0	0	0	0	0	0	0	0	0	0	0	0	0	0	0	0	0
ath-miR5648-5p	1.2736	0	0.509439	0	1.78304	1.25643	0	0.358981	0.717962	2.33337	0.3199	0	0.0457	0.2285	0.5941	0.570564	0	0.15849	0.285282	1.01434	0.423967	0	0	0.077085	0.501052	0.561395	0	0.112279	0.112279	0.785953
ath-miR5649a	0	0	0	0	0	0	0	0	0	0	0	0	0	0	0	0	0	0	0	0	0	0	0	0	0	0	0	0	0	0
ath-miR5649b	0	0	0	0	0	0	0	0	0	0	0	0	0	0	0	0	0	0	0	0	0	0	0	0	0	0	0	0	0	0
ath-miR5650	30.0569	0	2.80191	1.2736	34.1324	22.6158	0	3.7693	1.61541	28.0005	1.7366	0	0.0913999	0.0913999	1.9194	4.6596	0	0.633959	0.126792	5.42035	1.15627	0	0.115627	0.15417	1.42607	1.23507	0	0	0.0561395	1.29121
ath-miR5651	7.8963	0.764158	4.33023	1.2736	14.2643	7.71809	0.358981	4.30777	1.43592	13.8208	0.5484	0.0913999	0.5484	0	1.1882	2.44074	0.031698	1.14113	0.221886	3.83545	1.04065	0	0.077085	0.115627	1.23336	1.06665	0.112279	0.168419	0.0561395	1.40349
ath-miR5652	2.54719	0	0.254719	0.254719	3.05663	3.23083	0	0	0	3.23083	0.5027	0	0	0.2285	0.7312	1.5215	0	0.0633959	0.253584	1.83848	0.269797	0	0	0	0.269797	0.112279	0	0	0	0.112279
ath-miR5653	0	0	2.54719	0.509439	3.05663	0.17949	0	3.58981	0.17949	3.94879	0	0	0.1371	0.0457	0.1828	0	0	0.221886	0	0.221886	0	0	0.077085	0	0.077085	0	0	0	0	0
ath-miR5654-3p	64.6987	0	14.519	5.09439	84.3121	50.0778	0	8.97452	3.58981	62.6421	21.3419	0	5.1184	1.8737	28.334	33.5365	0.126792	10.5237	1.99697	46.184	6.86056	0.0385425	1.5417	0.346882	8.78768	7.97181	0	1.68419	0.392977	10.049
ath-miR5654-5p	0	0	0	0	0	0	0	0	0	0	0	0	0	0	0	0.031698	0	0	0	0.031698	0	0	0	0	0	0	0	0	0	0
ath-miR5655	0	0	0	0	0	0	0	0	0	0	0	0	0	0	0	0	0	0	0	0	0	0	0	0	0	0	0	0	0	0
ath-miR5656	0	0	0	0	0	0	0	0	0	0	0	0	0	0	0	0.031698	0	0	0	0.031698	0.0385425	0	0	0	0.0385425	0	0	0	0	0
ath-miR5657	0	0	0	0.509439	0.509439	0	0	0	0.538471	0.538471	0	0.0457	0	0.0913999	0.1371	0	0	0.0950939	0.253584	0.348678	0	0	0	0.269797	0.269797	0	0	0.0561395	0.112279	0.168418
ath-miR5658	0	0	0	0	0	0	0	0	0	0	0	0	0.0457	0	0.0457	0	0	0	0	0	0	0	0	0	0	0	0	0.0561395	0	0.0561395
ath-miR5659	0	0	0	0	0	0	0	0	0	0	0	0	0	0	0	0	0	0	0	0	0	0	0	0	0	0	0	0	0	0
ath-miR5660	0	0	0	0	0	0	0	0	0	0	0	0	0	0	0	0	0	0	0.031698	0.031698	0	0	0	0	0	0	0	0	0	0
ath-miR5661	0	0	0	0	0	0	0	0	0	0	0	0	0	0	0	0	0	0	0	0	0	0	0	0	0	0	0	0	0	0
ath-miR5662	0	0	0	0	0	0	0	0	0	0	0	0	0	0	0	0	0	0	0	0	0	0	0	0	0	0	0	0	0	0
ath-miR5663-3p	0	0	0	0	0	0	0	0	0	0	0.0457	0	0	0	0.0457	0	0	0	0	0	0	0	0	0	0	0	0	0	0	0
ath-miR5663-5p	0	0	0	0	0	0	0	0	0	0	0	0	0	0	0	0	0	0	0	0	0.0385425	0	0	0	0.0385425	0	0	0	0	0
ath-miR5664	0	0	0	0	0	0	0	0	0	0	0	0	0	0	0	0	0	0	0	0	0	0	0	0	0	0	0	0	0	0
ath-miR5665	0	0	0	0.254719	0.254719	0	0	0	0	0	0	0	0	0.0457	0.0457	0	0	0	0	0	0	0	0	0	0	0	0	0	0	0
ath-miR5666	0	0	0	0	0	0	0	0	0	0	0	0	0	0	0	0	0	0	0	0	0	0	0	0	0	0	0	0	0	0
ath-miR5995b	0.509439	0	0	0	0.509439	0.358981	0	0	0	0.358981	0.0457	0	0	0	0.0457	0.0633959	0	0	0.031698	0.0950939	0	0	0	0	0	0.0561395	0	0	0	0.0561395
ath-miR5996	59.0949	0.509439	61.1326	15.5379	136.275	82.2066	0.358981	47.7445	12.0259	142.336	5.027	0.0913999	2.1479	0.5027	7.769	10.3652	0.190188	7.38563	0.919241	18.8603	4.89489	0.15417	2.04275	0.655222	7.74703	3.92977	0.168419	1.68419	0.842093	6.62447
ath-miR5997	0.509439	0	0	0	0.509439	0	0	0	0	0	0.0913999	0	0	0	0.0913999	0.0950939	0	0	0	0.0950939	0	0	0	0	0	0	0	0.0561395	0	0.0561395
ath-miR5998a	0	0	0	0	0	0	0	0	0	0	0	0	0	0	0	0	0	0	0	0	0	0	0	0	0	0	0	0	0	0
ath-miR5998b	0	0	0	0	0	0	0	0	0	0	0	0	0	0	0	0	0	0	0	0	0	0	0	0	0	0	0	0	0	0
ath-miR5999	0	0	0.254719	0	0.254719	0	0	0	0	0	0	0	0	0	0	0	0.0633959	0	0	0.0633959	0	0	0	0	0	0	0	0	0	0
ath-miR771	0	0	1.01888	0.509439	1.52832	0.17949	0	0.538471	0.358981	1.07694	0	0	0.0913999	0	0.0913999	0.0950939	0	0.253584	0	0.348678	0.0385425	0	0.115627	0.0385425	0.192712	0	0.112279	0.0561395	0	0.168418
ath-miR773a	1.01888	2.54719	0.509439	34.1324	38.2079	0.717962	4.12828	0.538471	29.6159	35.0006	0.3656	1.1425	0.822599	14.3041	16.6348	0.665657	2.72603	1.45811	32.9976	37.8474	0.077085	4.0855	0.46251	37.8102	42.4353	0.392977	4.77186	0.785953	44.6309	50.5817
ath-miR773b-3p	0	0	0	0.254719	0.254719	0	0	0	0	0	0	0	0	0.1371	0.1371	0	0	0	0.0950939	0.0950939	0	0.0385425	0	0.0385425	0.077085	0	0	0	0	0
ath-miR774a	0	0	0	0	0	0	0	0	0	0	0	0	0	0	0	0	0	0	0	0	0	0	0	0	0	0	0	0	0	0
ath-miR775	44.8306	8.91518	38.2079	297.767	389.721	42.5392	6.46166	21.8978	275.877	346.776	37.6568	0.5027	7.63189	14.8525	60.6439	43.9334	1.07773	14.4226	25.9289	85.3626	10.2523	1.0021	4.58656	12.218	28.059	11.9016	1.40349	4.2666	11.0033	28.575
ath-miR776	0	0	0	0	0	0	0	0	0	0	0	0	0	0	0	0	0	0	0	0	0	0	0	0	0	0	0	0	0	0
ath-miR777	0	0	0	0	0	0	0	0	0	0	0.0913999	0	0	0	0.0913999	0.285282	0	0	0.031698	0.31698	0.963562	0.0385425	0.192712	0.231255	1.42607	1.90874	0	0.0561395	0.505256	2.47014
ath-miR778	0	0	0	0	0	0	0	0	0	0	0	0	0	0	0	0	0	0	0	0	0	0	0	0	0	0	0	0	0	0
ath-miR779.1	0	0	0	0.764158	0.764158	0	0	0	0.358981	0.358981	0	0	0.0913999	0.1371	0.2285	0	0.0633959	0.126792	0.729053	0.919241	0	0.0385425	0	0.385425	0.423967	0	0.0561395	0.0561395	0.617535	0.729814
ath-miR779.2	4.33023	0.509439	0	0.764158	5.60383	4.84624	0	0	1.25643	6.10267	1.7823	0.0457	0.1828	0.1828	2.1936	4.50111	0.0633959	0.47547	0.412074	5.45205	3.46882	0.115627	0.15417	0.886477	4.62509	3.48065	0.112279	0.112279	0.785953	4.49116
ath-miR780.1	3.31135	0	0	1.01888	4.33023	3.23083	0	0	0.717962	3.94879	0.1371	0	0	0	0.1371	0.348678	0	0	0.0950939	0.443772	0.0385425	0	0	0.0385425	0.077085	0.168419	0	0	0	0.168419
ath-miR780.2	0.254719	0	0.254719	0	0.509438	0	0	0	0.538471	0.538471	0.0913999	0	0	0.0913999	0.1828	0.0950939	0	0	0.031698	0.126792	0.077085	0.0385425	0	0	0.115627	0.168419	0	0	0	0.168419
ath-miR781a	23.6889	0.509439	2.80191	20.3775	47.3777	34.8211	0	6.10267	31.0518	71.9756	4.2044	0.0457	2.0108	1.5081	7.769	8.62185	0.0633959	4.05734	2.94791	15.6905	4.23967	0.115627	2.73652	1.46461	8.55643	4.65958	0	2.1333	1.57191	8.36479
ath-miR781b	23.6889	0.509439	2.80191	20.3775	47.3777	34.8211	0	6.10267	31.0518	71.9756	4.2044	0.0457	2.0108	1.5081	7.769	8.62185	0.0633959	4.05734	2.94791	15.6905	4.23967	0.115627	2.73652	1.46461	8.55643	4.65958	0	2.1333	1.57191	8.36479
ath-miR782	0	0	0	0	0	0	0	0	0	0	0	0	0	0	0	0	0	0	0	0	0	0	0	0	0	0	0	0	0	0
ath-miR8121	0	0	0	0	0	0	0	0	0	0	0	0	0	0	0	0	0	0	0	0	0	0	0	0	0	0	0	0	0	0
ath-miR8165	0	0	0	0	0	0	0	0	0	0	0	0	0	0	0	0	0	0	0	0	0	0	0	0	0	0	0	0	0	0
ath-miR8166	0	0	0	0	0	0	0	0	0	0	0	0	0.0457	0	0.0457	0	0	0	0	0	0	0	0	0	0	0	0	0	0	0
ath-miR8167a	0	0	0	0	0	0	0	0	0	0	0	0	0	0	0	0	0	0	0	0	0	0	0	0	0	0	0	0	0	0
ath-miR8167b	0	0	0	0	0	0	0	0	0	0	0	0	0	0	0	0	0	0	0	0	0	0	0	0	0	0	0	0	0	0
ath-miR8167c	0	0	0	0	0	0	0	0	0	0	0	0	0	0	0	0	0	0	0	0	0	0	0	0	0	0	0	0	0	0
ath-miR8167d	0	0	0	0	0	0	0	0	0	0	0	0	0	0	0	0	0	0	0	0	0	0	0	0	0	0	0	0	0	0
ath-miR8167e	0	0	0	0	0	0	0	0	0	0	0	0	0	0	0	0	0	0	0	0	0	0	0	0	0	0	0	0	0	0
ath-miR8167f	0	0	0	0	0	0	0	0	0	0	0	0	0	0	0	0	0	0	0	0	0	0	0	0	0	0	0	0	0	0
ath-miR8168	0	0	0	0	0	0	0	0	0	0	0	0	0	0	0	0	0	0	0.031698	0.031698	0	0	0	0	0	0	0	0	0	0
ath-miR8169	0	0	0	0	0	0	0	0	0	0	0	0	0	0	0	0	0	0	0	0	0.0385425	0	0	0	0.0385425	0	0	0	0	0
ath-miR8170-3p	0.254719	0	0	0.764158	1.01888	0	0	0	0.17949	0.17949	0	0	0	0	0	0	0.031698	0.031698	0	0.063396	0.0385425	0	0	0	0.0385425	0	0	0	0	0
ath-miR8170-5p	0	0	0	0	0	0	0	0	0	0	0	0	0	0	0	0	0	0	0	0	0	0	0	0	0	0	0	0	0	0
ath-miR8171	0	0	0	0	0	0	0	0	0	0	0	0	0	0.0457	0.0457	0	0	0	0	0	0	0	0	0	0	0	0	0	0	0
ath-miR8172	0	0	0	0	0	0	0	0	0	0	0	0	0	0	0	0	0	0	0	0	0	0	0	0	0	0	0	0	0	0
ath-miR8173	0	0	0	0	0	0	0	0	0	0	0	0	0	0	0	0	0	0	0	0	0	0	0	0	0	0	0	0	0	0
ath-miR8174	0	0	0	0	0	0	0	0	0	0	0	0	0	0	0	0	0	0	0	0	0	0	0	0	0	0	0	0	0	0
ath-miR8175	0	0	0	0	0	0	0	0	0	0	0	0	0	0	0	0	0	0	0	0	0	0	0	0	0	0	0	0	0	0
ath-miR8177	0	0	0	0	0	0	0	0	0	0	0	0	0	0	0	0	0	0	0	0	0	0	0	0	0	0	0	0	0	0
ath-miR8178	0	0	0	0	0	0	0	0	0	0	0	0	0	0	0	0	0	0	0	0	0	0	0	0	0	0	0	0	0	0
ath-miR8179	0	0	0	0	0	0.538471	0	0.17949	0	0.717961	0.1371	0	0.0913999	0	0.2285	0.253584	0	0.031698	0	0.285282	0.077085	0	0.077085	0.077085	0.231255	0.0561395	0	0	0.0561395	0.112279
ath-miR8180	0	0	0.254719	0	0.254719	0	0	0	0	0	0	0	0	0.0457	0.0457	0.0633959	0	0.031698	0	0.0950939	0	0	0	0	0	0	0	0	0	0
ath-miR8181	0	0	0	0	0	0	0	0	0	0	0	0	0	0	0	0	0	0	0	0	0	0	0	0	0	0	0	0	0	0
ath-miR8182	2.03775	0	0.764158	0	2.80191	1.25643	0	0	0.358981	1.61541	0.1828	0	0.0913999	0	0.2742	0.570564	0	0.15849	0.0633959	0.79245	0.231255	0	0.077085	0.0385425	0.346882	0.168419	0	0	0	0.168419
ath-miR8183	7.13214	0	4.83967	1.52832	13.5001	5.38471	0	1.7949	0.538471	7.71808	0.5484	0	0.2285	0	0.7769	1.42641	0	0.570564	0.285282	2.28226	0.269797	0.0385425	0.0385425	0.077085	0.423967	0.280698	0	0.0561395	0.112279	0.449116
ath-miR8184	0	0	1.78304	0.509439	2.29248	0	0	1.43592	0.717962	2.15388	0.0457	0	0	0	0.0457	0	0	0.15849	0	0.15849	0	0	0	0	0	0.0561395	0	0	0	0.0561395
ath-miR822-3p	2.80191	0	0.764158	5.09439	8.66046	1.07694	0.538471	0.717962	2.15389	4.48726	0.594099	0	0.0457	0.2285	0.868299	1.04603	0.253584	0.126792	0.633959	2.06037	1.23336	0.192712	0.15417	0.46251	2.04275	1.29121	0.112279	0.0561395	0.729814	2.18944
ath-miR822-5p	19.8681	1.2736	1.52832	4.33023	27.0003	15.2567	0.17949	3.58981	5.02573	24.0517	11.6078	0.2285	3.1533	1.9651	16.9547	24.5659	1.01434	5.38866	2.78942	33.7583	17.2285	0.963562	3.23757	3.04486	24.4745	18.0769	1.17893	2.75084	5.22097	27.2276
ath-miR823	57.3118	0	41.2645	4.58495	103.161	37.5135	0	17.7696	6.28216	61.5653	4.2044	0	1.2339	0.2742	5.7125	9.28751	0.0950939	3.23319	0.950939	13.5667	1.2719	0.077085	0.346882	0.15417	1.85004	1.68419	0	0.280698	0.168419	2.13331
ath-miR824-3p	0.254719	0	0	0.254719	0.509438	0.17949	0	0	0	0.17949	0.1371	0	0.0457	0.0457	0.2285	0.0950939	0	0	0.031698	0.126792	0.077085	0	0.0385425	0.077085	0.192713	0.280698	0.168419	0.0561395	0	0.505256
ath-miR824-5p	16.0473	0.254719	1.01888	3.31135	20.6322	17.949	0.897452	2.15389	3.05134	24.0517	1.4167	0.1371	0.5484	0.5027	2.6049	3.01131	0.0950939	0.47547	0.507168	4.08904	4.0855	0.385425	0.501052	0.655222	5.6272	4.99642	0.561395	0.505256	0.898232	6.9613
ath-miR825	103.416	29.2927	13.7548	8.91518	155.379	77.8988	27.821	9.69248	7.5386	122.951	15.538	0.4113	0.5027	0.822599	17.2746	31.7297	0.950939	1.71169	1.45811	35.8504	16.0337	2.77506	0.578137	1.31044	20.6973	17.1226	2.52628	0.505256	1.23507	21.3892
ath-miR826a	0	0	0	0	0	0.17949	0	0	0	0.17949	0	0	0	0	0	0	0	0	0	0	0.0385425	0	0	0	0.0385425	0.0561395	0	0	0	0.0561395
ath-miR826b	0	0	0	0	0	0	0	0	0	0	0	0	0	0	0	0	0	0	0	0	0	0	0	0	0	0	0	0	0	0
ath-miR827	2.03775	0.254719	0	1.01888	3.31135	2.33338	0	0.358981	0.717962	3.41032	0.0457	0.0913999	0.1371	0.0913999	0.3656	0.348678	0.031698	0.221886	0.0950939	0.697356	0.46251	0.115627	0.077085	0.115627	0.770849	0.280698	0.112279	0	0.336837	0.729814
ath-miR828	0.509439	0	0	0	0.509439	0.358981	0	0.17949	0	0.538471	0	0	0.0457	0	0.0457	0.0950939	0.031698	0.15849	0.0633959	0.348678	0.077085	0	0	0.115627	0.192712	0.168419	0.0561395	0	0	0.224558
ath-miR829-3p.1	0	0	0	0	0	0	0	0	0	0	0	0	0	0	0	0	0	0	0	0	0.0385425	0	0	0	0.0385425	0	0	0	0	0
ath-miR829-3p.2	0.509439	0	0.254719	0.254719	1.01888	1.25643	0	0.17949	0	1.43592	0.0457	0	0	0.0457	0.0914	0.285282	0	0.031698	0	0.31698	0.269797	0.0385425	0	0	0.308339	0.112279	0.0561395	0	0	0.168418
ath-miR829-5p	0.254719	0	0	0	0.254719	0.358981	0	0.17949	0.358981	0.897452	0.0457	0	0	0	0.0457	0.190188	0	0	0	0.190188	0.0385425	0	0.192712	0	0.231255	0.112279	0	0.112279	0	0.224558
ath-miR830-3p	0	0	0	0	0	0.717962	0	0	0	0.717962	0	0	0	0	0	0.031698	0	0	0	0.031698	0	0	0	0	0	0.112279	0	0	0.0561395	0.168418
ath-miR830-5p	0.254719	0	0	0	0.254719	0.17949	0	0	0	0.17949	0.0457	0	0	0	0.0457	0.0633959	0	0	0.031698	0.0950939	0	0	0	0	0	0.112279	0	0	0.112279	0.224558
ath-miR831-3p	148.756	0.254719	0	7.64158	156.652	131.028	0.17949	0	10.231	141.438	2.6049	0	0.1828	0.0913999	2.8791	6.08601	0	0.031698	0.190188	6.3079	0.809392	0	0.0385425	0	0.847935	0.673674	0	0.0561395	0	0.729814
ath-miR831-5p	0	0	0	0	0	0	0	0	0	0	0	0	0	0	0	0	0	0	0	0	0	0	0	0	0	0	0	0	0	0
ath-miR832-3p	0	0	0	0	0	0	0	0	0	0	0	0	0	0	0	0	0	0	0	0	0	0	0	0	0	0	0	0	0	0
ath-miR832-5p	0	0	0	0	0	0	0	0	0	0	0	0	0	0	0	0	0	0	0	0	0	0	0	0	0	0	0	0	0	0
ath-miR833a-3p	0	0	0	0	0	0.17949	0	0	0	0.17949	0	0	0.0913999	0	0.0913999	0	0	0.0950939	0	0.0950939	0	0	0	0	0	0	0	0	0	0
ath-miR833a-5p	16.5568	0	4.07551	4.33023	24.9625	24.4107	0	4.84624	3.7693	33.0262	1.1425	0	0.685499	0.0913999	1.9194	2.47244	0.0633959	2.15546	0.570564	5.26186	0.61668	0	0.385425	0.115627	1.11773	0.336837	0	0.224558	0.336837	0.898232
ath-miR833b	0.509439	0.509439	0.254719	0.254719	1.52832	0.897452	1.61541	0	0.358981	2.87184	0	0	0.1371	0.0457	0.1828	0.126792	0.253584	0.126792	0.0633959	0.570564	0.115627	0.15417	0.077085	0.077085	0.423967	0.112279	0	0	0.112279	0.224558
ath-miR834	0	0	0	0	0	0.17949	0	0	0	0.17949	0	0	0.0457	0	0.0457	0.031698	0	0	0	0.031698	0	0	0	0	0	0	0	0	0	0
ath-miR835-3p	0.254719	0	0	0	0.254719	0	0.358981	0	0	0.358981	0	0	0	0	0	0	0	0.031698	0	0.031698	0	0	0	0	0	0	0	0	0	0
ath-miR835-5p	0.254719	0	0	0	0.254719	0	0	0	0	0	0	0	0	0	0	0.0950939	0.031698	0	0	0.126792	0.0385425	0.0385425	0	0	0.077085	0.0561395	0	0	0	0.0561395
ath-miR836	0	0	0	0	0	0	0	0	0	0	0	0	0	0.0457	0.0457	0	0	0.031698	0	0.031698	0	0	0	0	0	0	0	0	0	0
ath-miR837-3p	0	0	0	0	0	0.17949	0	0	0	0.17949	0.0457	0	0.0457	0	0.0914	0.0950939	0	0	0.0633959	0.15849	0	0	0	0	0	0	0	0	0	0
ath-miR837-5p	0	0	0	0.254719	0.254719	0.358981	0	0	0	0.358981	0.0457	0	0	0	0.0457	0.0950939	0	0	0	0.0950939	0	0	0	0	0	0.0561395	0	0	0	0.0561395
ath-miR838	18.5945	0	6.36798	0.764158	25.7266	12.0259	0	2.87185	0.358981	15.2567	3.5189	0	0.5027	0.1371	4.1587	6.43469	0.031698	1.5215	0.253584	8.24147	2.92923	0	0.346882	0.15417	3.43028	3.25609	0.112279	0.168419	0.224558	3.76135
ath-miR839-5p	2.29247	0.254719	0	0.254719	2.80191	1.25643	0	0	0.17949	1.43592	1.8737	0.0457	0	0.3199	2.2393	5.10337	0.190188	0.0633959	0.855845	6.2128	1.5417	0.15417	0.15417	0.231255	2.08129	1.74032	0.112279	0.112279	0.449116	2.41399
ath-miR840-3p	13.5001	1.78304	1.78304	25.2172	42.2834	6.82064	2.51287	0.358981	21.1799	30.8724	0.913999	0.1371	0.2285	3.5189	4.7985	3.61357	0.729053	1.42641	7.95619	13.7252	1.46461	0.385425	0.269797	3.04486	5.16469	1.17893	0.224558	0.168419	3.98591	5.55782
ath-miR840-5p	0.254719	0	0	0.509439	0.764158	0.358981	0	0	0.358981	0.717962	0.0457	0	0.0457	0	0.0914	0.0950939	0	0.0633959	0.0950939	0.253584	0	0	0.077085	0	0.077085	0.0561395	0	0	0	0.0561395
ath-miR841a-3p	3.31135	0.254719	5.60382	3.56607	12.736	6.46166	0	4.12828	2.33338	12.9233	0.685499	0.0457	0.639799	0.1828	1.5538	2.37735	0.031698	1.33131	0.221886	3.96224	0.15417	0	0.15417	0.0385425	0.346882	0.112279	0	0.0561395	0.112279	0.280697
ath-miR841a-5p	3.05663	1.52832	3.56607	1.01888	9.1699	3.7693	2.15389	2.15389	2.15389	10.231	0.4113	0	0.685499	0	1.0968	1.5849	0.031698	1.26792	0.126792	3.01131	0.732307	0.15417	0.539595	0.15417	1.58024	1.01051	0.0561395	0.392977	0.280698	1.74032
ath-miR841b-3p	25.2172	0	0	1.78304	27.0002	16.5131	0	0	1.25643	17.7695	0.913999	0	0.0457	0.1828	1.1425	1.99697	0.031698	0.126792	0.0950939	2.25055	0.269797	0	0	0.0385425	0.308339	0.168419	0	0	0	0.168419
ath-miR841b-5p	0.764158	0.254719	0.254719	0.509439	1.78303	0.717962	0.17949	0.17949	0.17949	1.25643	0.1371	0	0.0913999	0	0.2285	0.285282	0	0.0633959	0.031698	0.380376	0.0385425	0	0.115627	0	0.154169	0.0561395	0	0.0561395	0	0.112279
ath-miR842	1.01888	0	0	0.254719	1.2736	1.07694	0	0	1.25643	2.33337	0.3199	0	0.1371	0.2285	0.6855	0.412074	0.0633959	0.190188	0.570564	1.23622	0.30834	0.077085	0.15417	0.15417	0.693765	0.224558	0	0	0.392977	0.617535
ath-miR843	707.356	0	13.5001	57.0571	777.913	560.19	0.17949	12.5643	26.0261	598.96	13.2073	0.1371	1.7823	0.685499	15.8122	35.1214	0.31698	4.12074	1.87018	41.4293	3.96988	0.115627	0.578137	0.501052	5.1647	3.19995	0.224558	0.673674	0.505256	4.60344
ath-miR844-3p	0	0.254719	0.509439	0.254719	1.01888	0	0.358981	0.358981	0	0.717962	0.2742	0.0457	0.0457	0	0.3656	0.348678	0.031698	0.15849	0.031698	0.570564	0.385425	0.0385425	0.077085	0.346882	0.847935	1.01051	0	0.112279	0.336837	1.45963
ath-miR844-5p	0	0	0	0	0	0	0	0	0	0	0	0	0	0	0	0.0950939	0	0	0	0.0950939	0.0385425	0	0	0	0.0385425	0	0	0	0	0
ath-miR845a	476.325	0.254719	2.29247	24.4531	503.325	839.836	0.358981	2.87185	47.9239	890.991	29.3394	0	0.3656	1.6909	31.3959	63.8714	0.0950939	0.602261	2.82112	67.3899	10.9461	0.0385425	0.077085	0.77085	11.8326	10.3858	0.0561395	0.224558	0.842093	11.5086
ath-miR845b	8.15102	0	1.01888	0	9.1699	10.5899	0	0.897452	0.897452	12.3848	0.4113	0	0	0	0.4113	0.919241	0	0.0633959	0	0.982637	0.115627	0	0	0.115627	0.231254	0.168419	0	0	0	0.168419
ath-miR846-3p	262.106	77.6894	20.6323	24.9625	385.39	394.52	105.899	22.4363	39.8469	562.702	87.8353	2.742	8.68299	7.95179	107.212	187.113	9.3192	15.532	13.6618	225.626	201.038	7.40016	3.04486	18.5004	229.983	206.257	7.91567	3.36837	21.5014	239.042
ath-miR846-5p	11.7171	4.83967	9.67933	7.64158	33.8777	14.0003	3.94879	8.61554	9.15401	35.7186	1.0511	0.2285	3.3818	0.4113	5.0727	3.61357	0.348678	5.03998	0.729053	9.73128	1.77295	0.46251	0.925019	0.30834	3.46882	2.30172	0.505256	1.12279	0.336837	4.2666
ath-miR847	10.6982	0.254719	3.31135	0.254719	14.519	5.92318	0	1.43592	0.358981	7.71808	1.3253	0	0.1371	0.1828	1.6452	1.93358	0.031698	0.31698	0.31698	2.59924	1.2719	0.192712	0.269797	0.077085	1.81149	1.62805	0	0.168419	0.224558	2.02103
ath-miR848	3.31135	0	2.80191	2.03775	8.15101	3.7693	0	2.33338	0.717962	6.82064	2.1022	0.0457	1.5081	0.1828	3.8388	3.1064	0.126792	2.34565	0.507168	6.08601	0.847935	0	0.925019	0.192712	1.96567	0.785953	0.0561395	0.449116	0.336837	1.62805
ath-miR849	0	0	0	0	0	0	0	0	0	0	0	0	0	0	0	0	0	0	0	0	0	0	0	0	0	0	0	0	0	0
ath-miR850	46.8684	57.3118	83.8027	142.898	330.881	27.2825	85.6169	79.6937	240.158	432.751	0.5484	0.3199	2.6506	1.5995	5.1184	1.5849	0.729053	7.25884	4.91319	14.486	0.346882	0.963562	0.539595	2.08129	3.93133	0.392977	1.51577	0.449116	1.74032	4.09818
ath-miR851-3p	0.254719	0	0	0	0.254719	0.17949	0	0	0	0.17949	0	0	0	0	0	0.0950939	0	0	0	0.0950939	0	0	0	0	0	0	0	0	0	0
ath-miR851-5p	0.254719	0	0.509439	0	0.764158	0	0	0	0.17949	0.17949	0	0	0.0457	0.1371	0.1828	0.031698	0	0.031698	0.0633959	0.126792	0.0385425	0	0	0.0385425	0.077085	0	0	0	0.112279	0.112279
ath-miR852	0	0	0	0	0	0	0	0	0	0	0.1371	0	0	0	0.1371	0.221886	0	0	0.031698	0.253584	0.0385425	0	0	0	0.0385425	0.0561395	0	0	0	0.0561395
ath-miR853	0.254719	0	0	0.509439	0.764158	0.538471	0.358981	0	0.897452	1.7949	0	0.0457	0	0.0457	0.0914	0.0950939	0.0633959	0.031698	0.253584	0.443772	0.077085	0.0385425	0	0.30834	0.423967	0.112279	0.168419	0	0.224558	0.505256
ath-miR855	0	0	0	0	0	0	0	0	0	0	0	0	0	0	0	0	0	0	0	0	0	0	0	0	0	0	0	0	0	0
ath-miR856	0	0	0	0	0	0	0	0	0	0	0	0	0	0	0	0	0	0	0.031698	0.031698	0	0	0	0	0	0	0	0	0	0
ath-miR857	6.11326	0.764158	2.80191	3.31135	12.9907	7.71809	0	1.7949	2.69236	12.2053	1.5995	0.1371	1.0511	0.959699	3.7474	3.77206	0.31698	2.31395	1.33131	7.7343	0.925019	0.077085	0.346882	0.423967	1.77295	1.40349	0.112279	0.617535	0.112279	2.24558
ath-miR858a	16.8115	13.5001	5.09439	14.7737	50.1797	33.9237	15.9746	8.07707	22.6158	80.5912	14.3041	2.0108	4.2958	6.62649	27.2372	23.3931	3.04301	8.20978	10.7456	45.3915	25.0141	6.01263	3.93133	13.3742	48.3323	28.2382	6.00693	4.65958	14.484	53.3887
ath-miR858b	10.4435	1.78304	4.58495	2.29247	19.104	12.5643	1.61541	6.64115	2.51287	23.3337	7.17489	0.1371	1.5081	1.1425	9.96259	9.95316	0.507168	2.69433	1.23622	14.3909	10.0981	0.269797	1.61878	1.58024	13.5669	12.7437	0.561395	1.68419	1.90874	16.898
ath-miR859	0.254719	0	0.509439	0.509439	1.2736	0.538471	0	0	0.538471	1.07694	0.0457	0	0.0913999	0.0913999	0.2285	0.412074	0.031698	0.507168	0.0633959	1.01434	0.115627	0	0.0385425	0.0385425	0.192712	0.112279	0	0.112279	0	0.224558
ath-miR860	0.509439	0.509439	0	0.254719	1.2736	2.15389	0	0.538471	0.717962	3.41032	0.1371	0	0.1371	0	0.2742	0.0950939	0.031698	0.221886	0	0.348678	0.0385425	0	0	0.0385425	0.077085	0.168419	0	0.112279	0.0561395	0.336838
ath-miR861-3p	0	0	0	0	0	0	0	0	0	0	0	0	0	0	0	0	0	0	0	0	0	0	0	0	0	0	0	0	0	0
ath-miR861-5p	0	0	0	0	0	0	0	0	0	0	0	0	0	0	0	0	0	0	0	0	0	0	0	0	0	0	0	0	0	0
ath-miR862-3p	0	0	0	0	0	0	0	0	0	0	0	0	0	0	0	0	0	0	0	0	0	0	0	0	0	0	0	0	0	0
ath-miR862-5p	3.05663	0.254719	0.254719	1.52832	5.09439	4.30777	0	0.717962	0.538471	5.5642	0.457	0	0.0913999	0.0457	0.5941	1.5215	0	0.15849	0.15849	1.83848	0.539595	0	0.077085	0.115627	0.732307	0.617535	0	0	0.0561395	0.673674
ath-miR863-3p	1.52832	0.254719	0	0	1.78304	0.717962	0	0	0	0.717962	0.0913999	0	0.1371	0	0.2285	0.15849	0	0.0950939	0.031698	0.285282	0.231255	0	0.077085	0	0.30834	0.112279	0	0	0	0.112279
ath-miR863-5p	1.78304	4.33023	0.254719	7.38686	13.7548	2.87185	9.51299	0	12.5643	24.9491	1.2339	0.2285	0.2285	0.3656	2.0565	1.93358	0.285282	0.47547	0.887543	3.58188	1.23336	0.077085	0.0385425	0.269797	1.61878	0.954372	0.112279	0.0561395	0.505256	1.62805
ath-miR864-3p	0	0	0	0	0	0	0	0	0	0	0	0	0	0	0	0	0	0	0	0	0	0	0	0	0	0	0	0.112279	0	0.112279
ath-miR864-5p	0	0.764158	0	0	0.764158	0	1.61541	0.358981	0.358981	2.33337	0.0457	0.0457	0.1371	0.0913999	0.3199	0.0950939	0.0950939	0.126792	0.15849	0.47547	0.0385425	0.077085	0.0385425	0.077085	0.231255	0.0561395	0.112279	0.0561395	0.0561395	0.280697
ath-miR865-3p	0	0	0	0	0	0	0	0	0	0	0	0	0	0	0	0	0	0	0	0	0	0	0	0	0	0	0	0	0.0561395	0.0561395
ath-miR865-5p	0.254719	0	0	0	0.254719	0	0	0	0	0	0.0457	0	0	0	0.0457	0.031698	0	0	0	0.031698	0	0	0	0	0	0.0561395	0	0	0	0.0561395
ath-miR866-3p	0.254719	0	0	0.254719	0.509438	0.358981	0	0	0	0.358981	0	0	0	0	0	0	0	0.0633959	0	0.0633959	0	0	0	0	0	0	0	0	0	0
ath-miR866-5p	0	0	0	0.254719	0.254719	0	0	0.538471	1.07694	1.61541	0	0	0.0457	0.1828	0.2285	0.0633959	0	0.15849	0.253584	0.47547	0.0385425	0	0.15417	0.077085	0.269798	0	0	0.112279	0.112279	0.224558
ath-miR868-3p	0	0	0	0	0	0	0	0	0	0	0	0	0	0	0	0	0	0	0	0	0	0	0	0	0	0	0	0	0	0
ath-miR868-5p	0	0.254719	0	0	0.254719	0	0.717962	0	0	0.717962	0	0	0	0	0	0.0633959	0	0.0633959	0	0.126792	0.077085	0.0385425	0	0	0.115627	0.0561395	0	0.0561395	0	0.112279
ath-miR869.1	0	0	0	0	0	0	0	0	0	0	0.0457	0	0	0	0.0457	0	0	0	0	0	0	0.0385425	0	0	0.0385425	0	0	0	0	0
ath-miR869.2	43.0476	2.29247	571.845	27.5097	644.695	49.3599	3.58981	504.907	23.8722	581.729	5.484	0.0913999	5.2098	0.822599	11.6078	16.2294	0.443772	22.4422	1.83848	40.9539	1.5417	0.077085	0.423967	0.192712	2.23546	1.8526	0.0561395	0.280698	0.112279	2.30172
ath-miR870-3p	1.2736	0	0	0	1.2736	0.358981	0	0	0	0.358981	0.1828	0	0.0457	0	0.2285	0.190188	0	0	0	0.190188	0	0	0	0	0	0.112279	0	0	0	0.112279
ath-miR870-5p	0	0	0.509439	0	0.509439	0	0	0	0	0	0	0	0	0	0	0	0	0	0	0	0	0	0	0	0	0	0	0	0	0
miR156ij	6.11326	0	3.56607	4.33023	14.0096	4.66675	0	1.97439	4.66675	11.3079	0.0913999	0	0.2742	0.4113	0.7769	0.919241	0	1.39471	0.507168	2.82112	0.192712	0	0.385425	0.231255	0.809392	0.224558	0	0.224558	0.168419	0.617535
miR159a-c	87961.4	4295.59	18370.1	18385.1	129012	95777.7	4580.41	16910.1	16054.9	133323	9374.16	255.508	3847.35	2046.9	15523.9	22319.3	592.879	8682.71	3990.78	35585.7	8388.24	380.299	4101.11	2361.96	15231.6	8449.44	363.11	3865.83	2542.39	15220.8
miR167abd	1143.43	5.34911	676.79	325.276	2150.85	1018.43	3.23082	579.574	255.594	1856.83	518.786	17.4117	496.302	154.192	1186.69	726.739	37.467	1142.24	274.124	2180.57	288.722	36.1529	465.593	166.85	957.318	304.389	35.9855	498.239	186.103	1024.72
miR169a-c	0	0	0.254719	1.52832	1.78303	0	0	0.717962	1.43592	2.15389	0.0913999	0.0457	0.0457	0.5484	0.7312	0.0633959	0.031698	0.190188	0.285282	0.570564	0.192712	0.0385425	0.077085	0.269797	0.578137	0.112279	0.0561395	0.280697	0.112279	0.561395
miR172a-d	2.03775	1.78304	0	1.01888	4.83967	3.94879	1.97439	0.17949	1.43592	7.53859	3.7931	0.639799	0.1371	1.2796	5.8496	5.35696	0.760751	0.443772	1.36301	7.92449	4.77927	1.07919	0.346882	1.73441	7.93974	5.67009	1.23507	0.673675	2.52628	10.1051
miR319a-c	471.995	495.43	156.653	5230.91	6354.99	798.374	1045.71	156.337	11447.7	13448.2	92.451	68.9155	48.9904	461.021	671.378	178.079	128.884	90.4659	912.839	1310.27	126.959	74.3484	19.965	268.41	489.682	136.924	81.4584	21.726	301.469	541.577
miR395a-f	4631.57	29.5474	35.406	435.57	5132.09	3018.84	21.7184	35.1801	320.928	3396.67	153.369	1.6909	4.0216	21.4333	180.515	460.54	5.19846	10.5871	41.2391	517.565	38.3883	0.963562	1.5417	5.28032	46.1739	37.1644	0.617534	1.51577	5.67009	44.9678
miR396ab	11032.2	80.4913	3114.2	3141.19	17368	13250.9	91.1812	3317.7	3797.3	20457.1	2093.2	27.3286	428.529	556.351	3105.41	4929.7	56.8345	997.568	1086.76	7070.87	1650.78	47.4457	297.201	589.237	2584.66	1663.07	49.3467	321.006	647.401	2680.83
miR398a-c	45347.7	11.7171	252.682	6249.54	51861.6	58942.3	11.4874	224.722	8445.57	67624.1	3180.68	2.9248	37.2455	568.873	3789.72	6820.61	3.70866	74.7438	909.478	7808.54	2163.19	4.0855	28.0975	432.755	2628.13	2801.36	6.51218	29.8101	620.454	3458.14
miR399a-f	52.2175	0	0.509438	3.05663	55.7836	68.9243	0.358981	0.897452	8.61554	78.7963	10.5567	0.1828	0.1371	1.4624	12.339	21.2059	0.190188	0.602262	2.21886	24.2172	9.28873	0.346882	0.423968	2.19692	12.2565	8.19637	0.168418	0.617534	1.62805	10.6104

## Sheet: AGO1 IP-Abundance
S4 Data. Composition of miRNA forms in AGO1 and AGO10 IP treated with SDN1 and SDN1 catalytic mutant (SDN1-D283A).
	AGO1 IP (Mock)				AGO1 IP (SDN1)				AGO1 IP (SDN1-283A)
miRNAs	br1	br2	Mean	Stdev	br1	br2	Mean	Stdev	br1	br2	Mean	Stdev
ath-miR156a-3p	0.509438	0.35898	0.434209	0.10639	0.1828	0.253584	0.218192	0.0500518	0.154169	0	0.0770847	0.109014
ath-miR156a-5p	11731.1	10811.8	11271.4	650.064	880.045	2438.77	1659.41	1102.19	585.653	589.408	587.53	2.65547
ath-miR156b-3p	5386.55	1986.42	3686.48	2404.25	96.6098	155.257	125.933	41.4696	61.3981	59.3395	60.3688	1.45566
ath-miR156b-5p	11731.1	10811.8	11271.4	650.064	880.045	2438.77	1659.41	1102.19	585.653	589.408	587.53	2.65547
ath-miR156c-3p	0.509439	0.17949	0.344465	0.233309	0	0.126792	0.063396	0.0896554	0.0385425	0.0561395	0.047341	0.012443
ath-miR156c-5p	11731.1	10811.8	11271.4	650.064	880.045	2438.77	1659.41	1102.19	585.653	589.408	587.53	2.65547
ath-miR156d-3p	0	0	0	0	0	0	0	0	0	0	0	0
ath-miR156d-5p	11731.1	10811.8	11271.4	650.064	880.045	2438.77	1659.41	1102.19	585.653	589.408	587.53	2.65547
ath-miR156e	11731.1	10811.8	11271.4	650.064	880.045	2438.77	1659.41	1102.19	585.653	589.408	587.53	2.65547
ath-miR156f-3p	0	0	0	0	0	0	0	0	0	0	0	0
ath-miR156f-5p	11731.1	10811.8	11271.4	650.064	880.045	2438.77	1659.41	1102.19	585.653	589.408	587.53	2.65547
ath-miR156g	41.5193	41.4623	41.4908	0.040298	3.1076	8.49506	5.80133	3.80951	1.46461	1.96488	1.71475	0.353744
ath-miR156h	1.52832	1.25643	1.39237	0.19225	0.0914	0.190188	0.140794	0.0698535	0.192713	0.112279	0.152496	0.0568751
ath-miR156i	5.34911	3.76929	4.5592	1.1171	0.3656	1.39471	0.880154	0.727689	0.539595	0.336837	0.438216	0.143372
ath-miR156j	12.2265	9.51299	10.8698	1.91876	0.6855	2.44074	1.56312	1.24114	0.809392	0.617535	0.713464	0.135663
ath-miR157a-3p	3.56607	3.41032	3.48819	0.110128	0.5484	0.760751	0.654575	0.150155	0.15417	0.280698	0.217434	0.0894688
ath-miR157a-5p	1448.59	1285.33	1366.96	115.44	146.423	314.19	230.306	118.63	145.575	171.562	158.569	18.3758
ath-miR157b-3p	3.56607	3.41032	3.48819	0.110128	0.5484	0.760751	0.654575	0.150155	0.15417	0.280698	0.217434	0.0894688
ath-miR157b-5p	1448.59	1285.33	1366.96	115.44	146.423	314.19	230.306	118.63	145.575	171.562	158.569	18.3758
ath-miR157c-3p	36.9343	11.1284	24.0313	18.2475	2.742	4.6913	3.71665	1.37836	1.19482	1.06665	1.13073	0.0906263
ath-miR157c-5p	1448.59	1285.33	1366.96	115.44	146.423	314.19	230.306	118.63	145.575	171.562	158.569	18.3758
ath-miR157d	85.5857	76.2834	80.9346	6.57771	9.9169	17.8143	13.8656	5.58428	8.47934	9.31915	8.89925	0.593835
ath-miR158a-3p	51196	56383.6	53789.8	3668.22	5662.45	12006.7	8834.57	4486.05	5456.95	6666.29	6061.62	855.13
ath-miR158a-5p	100.869	63.5396	82.2042	26.3958	2.6049	7.10035	4.85262	3.17876	1.15627	1.29121	1.22374	0.0954135
ath-miR158b	249.371	272.646	261.008	16.4581	31.4416	66.2804	48.861	24.6348	29.0224	33.2907	31.1566	3.01814
ath-miR159a	71955.7	74134.9	73045.3	1540.93	9472.91	22392.1	15932.5	9135.23	9743.27	9740.87	9742.07	1.69776
ath-miR159b-3p	70446.7	71530.8	70988.8	766.567	8984.7	20265.2	14624.9	7976.49	8410.59	8082.57	8246.58	231.944
ath-miR159b-5p	4.07551	3.94879	4.01215	0.0896024	0.2742	0.380376	0.327288	0.0750778	0.231255	0.392977	0.312116	0.114354
ath-miR159c	9990.34	9569.71	9780.03	297.435	1823.75	4230.92	3027.33	1702.12	1683.31	1704.23	1693.77	14.796
ath-miR160a-3p	0	0	0	0	0.0457	0	0.02285	0.0323148	0	0	0	0
ath-miR160a-5p	436.08	338.34	387.21	69.113	84.7278	200.521	142.624	81.8781	82.8278	94.2021	88.5149	8.04282
ath-miR160b	436.08	338.34	387.21	69.113	84.7278	200.521	142.624	81.8781	82.8278	94.2021	88.5149	8.04282
ath-miR160c-3p	0	0.358981	0.17949	0.253838	0.0914	0.15849	0.124945	0.0474397	0	0.0561395	0.0280698	0.0396966
ath-miR160c-5p	436.08	338.34	387.21	69.113	84.7278	200.521	142.624	81.8781	82.8278	94.2021	88.5149	8.04282
ath-miR161.1	80034.6	41319.9	60677.3	27375.4	8103.52	12942.4	10522.9	3421.57	4073.98	4692.42	4383.2	437.304
ath-miR161.2	64.4439	64.437	64.4405	0.00490732	7.1292	15.9124	11.5208	6.21065	10.0211	10.049	10.035	0.0197354
ath-miR162a-3p	101433	83354.2	92393.5	12783.5	2375.53	5560.97	3968.25	2252.44	935.195	857.138	896.166	55.1943
ath-miR162a-5p	140.859	118.105	129.482	16.0899	13.1616	34.3606	23.7611	14.9899	4.50947	2.9754	3.74244	1.08475
ath-miR162b-3p	101433	83354.2	92393.5	12783.5	2375.53	5560.97	3968.25	2252.44	935.195	857.138	896.166	55.1943
ath-miR162b-5p	140.859	118.105	129.482	16.0899	13.1616	34.3606	23.7611	14.9899	4.50947	2.9754	3.74244	1.08475
ath-miR163	1870.91	1935.27	1903.09	45.5075	336.397	678.875	507.636	242.168	320.018	352.669	336.344	23.0874
ath-miR164a	663.798	525.727	594.763	97.6313	122.659	283.316	202.987	113.602	95.2384	101.893	98.5658	4.70563
ath-miR164b-3p	0.764158	2.51287	1.63851	1.23653	0.5484	1.29962	0.924008	0.531191	1.2719	1.74033	1.50611	0.331231
ath-miR164b-5p	663.798	525.727	594.763	97.6313	122.659	283.316	202.987	113.602	95.2384	101.893	98.5658	4.70563
ath-miR164c-3p	3.31135	1.97439	2.64287	0.945371	0.0457	0.31698	0.18134	0.191824	0.192713	0.168418	0.180565	0.0171785
ath-miR164c-5p	387.173	288.082	337.628	70.0684	52.7378	125.556	89.1468	51.4901	33.0694	35.8731	34.4713	1.98251
ath-miR165a-3p	9319.16	16226.9	12773	4884.49	4909.41	9023.06	6966.23	2908.79	4004.06	4261.21	4132.64	181.833
ath-miR165a-5p	1.52832	0	0.764159	1.08068	0.0457	0.031698	0.038699	0.00990091	0	0	0	0
ath-miR165b	9319.16	16226.9	12773	4884.49	4909.41	9023.06	6966.23	2908.79	4004.06	4261.21	4132.64	181.833
ath-miR166a-3p	12801.4	26481.3	19641.4	9673.12	9828.55	19260.1	14544.3	6669.14	7583.93	7842.69	7713.31	182.97
ath-miR166a-5p	0	0.35898	0.17949	0.253837	0.0457	0.095094	0.070397	0.0349268	0	0.0561395	0.0280698	0.0396966
ath-miR166b-3p	12801.4	26481.3	19641.4	9673.12	9828.55	19260.1	14544.3	6669.14	7583.93	7842.69	7713.31	182.97
ath-miR166b-5p	0	0.35898	0.17949	0.253837	0.0457	0.095094	0.070397	0.0349268	0	0.0561395	0.0280698	0.0396966
ath-miR166c	12801.4	26481.3	19641.4	9673.12	9828.55	19260.1	14544.3	6669.14	7583.93	7842.69	7713.31	182.97
ath-miR166d	12801.4	26481.3	19641.4	9673.12	9828.55	19260.1	14544.3	6669.14	7583.93	7842.69	7713.31	182.97
ath-miR166e-3p	12801.4	26481.3	19641.4	9673.12	9828.55	19260.1	14544.3	6669.14	7583.93	7842.69	7713.31	182.97
ath-miR166e-5p	0	0	0	0	0	0	0	0	0	0	0	0
ath-miR166f	12801.4	26481.3	19641.4	9673.12	9828.55	19260.1	14544.3	6669.14	7583.93	7842.69	7713.31	182.97
ath-miR166g	12801.4	26481.3	19641.4	9673.12	9828.55	19260.1	14544.3	6669.14	7583.93	7842.69	7713.31	182.97
ath-miR167a-3p	0	0	0	0	0.1828	0.15849	0.170645	0.0171899	0.077085	0.168419	0.122752	0.0645829
ath-miR167a-5p	1875.75	1673.93	1774.84	142.709	1090.9	2014.28	1552.59	652.928	855.72	909.685	882.702	38.1592
ath-miR167b	1875.75	1673.93	1774.84	142.709	1090.9	2014.28	1552.59	652.928	855.72	909.685	882.702	38.1592
ath-miR167c-3p	1210.17	596.627	903.398	433.841	24.3581	39.3055	31.8318	10.5694	9.21165	7.01744	8.11454	1.55154
ath-miR167c-5p	13.5001	12.0259	12.763	1.04246	3.656	10.0483	6.85213	4.52001	4.31675	5.27712	4.79693	0.679081
ath-miR167d	908.328	742.732	825.53	117.095	584.823	1296.96	940.89	503.555	563.221	608.328	585.774	31.8952
ath-miR168a-3p	44.0664	38.2315	41.1489	4.12591	0.3199	1.26792	0.79391	0.670351	0.578137	0.785953	0.682045	0.146948
ath-miR168a-5p	2077.23	2236.45	2156.84	112.585	303.95	748.738	526.344	314.513	100.866	88.3075	94.5866	8.87996
ath-miR168b-3p	3.05663	0.717962	1.8873	1.65369	0	0.221886	0.110943	0.156897	0.115627	0	0.0578137	0.081761
ath-miR168b-5p	2077.23	2236.45	2156.84	112.585	303.95	748.738	526.344	314.513	100.866	88.3075	94.5866	8.87996
ath-miR169a-3p	0	0	0	0	0	0	0	0	0	0	0	0
ath-miR169a-5p	1.01888	1.43592	1.2274	0.294897	0.457	0.412074	0.434537	0.0317675	0.423967	0.505256	0.464611	0.0574804
ath-miR169b-3p	0	0	0	0	0	0	0	0	0	0	0	0
ath-miR169b-5p	1.01888	1.43592	1.2274	0.294897	0.3199	0.348678	0.334289	0.0203491	0.231255	0.336838	0.284046	0.0746581
ath-miR169c	1.01888	1.43592	1.2274	0.294897	0.3199	0.348678	0.334289	0.0203491	0.231255	0.336838	0.284046	0.0746581
ath-miR169d	0	0.17949	0.089745	0.126919	0	0	0	0	0.077085	0	0.0385425	0.0545073
ath-miR169e	0	0.17949	0.089745	0.126919	0	0	0	0	0.077085	0	0.0385425	0.0545073
ath-miR169f-3p	0.254719	0	0.127359	0.180114	0	0	0	0	0.0385425	0	0.0192713	0.0272537
ath-miR169f-5p	0	0.17949	0.089745	0.126919	0	0	0	0	0.077085	0	0.0385425	0.0545073
ath-miR169g-3p	0	0	0	0	0	0	0	0	0	0	0	0
ath-miR169g-5p	0	0.17949	0.089745	0.126919	0	0	0	0	0.077085	0	0.0385425	0.0545073
ath-miR169h	1.2736	1.7949	1.53425	0.368618	0.0913999	0.507168	0.299284	0.293992	0.423967	0.392977	0.408472	0.0219132
ath-miR169i	1.2736	1.7949	1.53425	0.368618	0.0913999	0.507168	0.299284	0.293992	0.423967	0.392977	0.408472	0.0219132
ath-miR169j	1.2736	1.7949	1.53425	0.368618	0.0913999	0.507168	0.299284	0.293992	0.423967	0.392977	0.408472	0.0219132
ath-miR169k	1.2736	1.7949	1.53425	0.368618	0.0913999	0.507168	0.299284	0.293992	0.423967	0.392977	0.408472	0.0219132
ath-miR169l	1.2736	1.7949	1.53425	0.368618	0.0913999	0.507168	0.299284	0.293992	0.423967	0.392977	0.408472	0.0219132
ath-miR169m	1.2736	1.7949	1.53425	0.368618	0.0913999	0.507168	0.299284	0.293992	0.423967	0.392977	0.408472	0.0219132
ath-miR169n	1.2736	1.7949	1.53425	0.368618	0.0913999	0.507168	0.299284	0.293992	0.423967	0.392977	0.408472	0.0219132
ath-miR170-3p	0	0.538471	0.269236	0.380756	0.3656	0.79245	0.579025	0.301829	1.54169	2.35786	1.94977	0.577113
ath-miR170-5p	80.746	143.592	112.169	44.439	48.8533	99.2464	74.0498	35.6333	35.9601	31.4381	33.6991	3.19754
ath-miR171a-3p	6.87742	6.82063	6.84902	0.0401552	10.1911	20.1916	15.1914	7.07143	18.8858	22.2312	20.5585	2.36559
ath-miR171a-5p	80.746	143.592	112.169	44.439	48.8533	99.2464	74.0498	35.6333	35.9601	31.4381	33.6991	3.19754
ath-miR171b-3p	47.8872	37.5135	42.7004	7.33532	6.5808	17.8777	12.2292	7.98809	9.48145	12.8559	11.1687	2.38613
ath-miR171b-5p	0.509439	0.538471	0.523955	0.0205287	0.2742	0.412074	0.343137	0.0974916	0	0	0	0
ath-miR171c-3p	47.8872	37.5135	42.7004	7.33532	6.5808	17.8777	12.2292	7.98809	9.48145	12.8559	11.1687	2.38613
ath-miR171c-5p	0.254719	0.538471	0.396595	0.200643	0.1371	0.190188	0.163644	0.0375388	0	0	0	0
ath-miR172a	4.33023	6.64114	5.48569	1.63406	5.0727	7.06865	6.07067	1.41135	7.01472	8.87004	7.94238	1.31191
ath-miR172b-3p	4.33023	6.64114	5.48569	1.63406	5.0727	7.06865	6.07067	1.41135	7.01472	8.87004	7.94238	1.31191
ath-miR172b-5p	0	0	0	0	0	0	0	0	0	0	0	0
ath-miR172c	0.509439	1.07694	0.79319	0.401285	0.913999	1.29962	1.10681	0.272673	1.2719	1.90874	1.59032	0.450315
ath-miR172d-3p	0.509439	1.07694	0.79319	0.401285	0.913999	1.29962	1.10681	0.272673	1.2719	1.90874	1.59032	0.450315
ath-miR172d-5p	0	0	0	0	0	0	0	0	0	0	0	0
ath-miR172e-3p	0	0.538471	0.269236	0.380756	0.1371	0.126792	0.131946	0.00728893	0.30834	0.168418	0.238379	0.0989394
ath-miR172e-5p	0	0	0	0	0	0	0	0	0	0	0	0
ath-miR173-3p	17.0661	7.3591	12.2126	6.86392	0.914	1.93357	1.42379	0.720946	0.30834	0.842093	0.575217	0.37742
ath-miR173-5p	131.945	125.105	128.525	4.83648	81.2546	205.562	143.408	87.8984	75.5817	68.4902	72.036	5.01449
ath-miR1886.1	1.2736	0.897452	1.08552	0.265974	0	0.443772	0.221886	0.313794	0.0385425	0.0561395	0.047341	0.012443
ath-miR1886.2	6.36799	9.51299	7.94049	2.22385	1.4167	3.45508	2.43589	1.44136	3.50737	3.14381	3.32559	0.257071
ath-miR1886.3	0	0	0	0	0	0	0	0	0	0	0	0
ath-miR1888a	31.5852	37.334	34.4596	4.06502	3.3818	7.63921	5.51051	3.01044	2.96777	3.42451	3.19614	0.322961
ath-miR1888b	1.78304	2.33337	2.05821	0.389144	0	0.253584	0.126792	0.179311	0.15417	0.0561395	0.105155	0.069318
ath-miR2111a-3p	0	0	0	0	0	0	0	0	0.077085	0	0.0385425	0.0545073
ath-miR2111a-5p	0	0	0	0	0.0913999	0.031698	0.061549	0.0422156	0.077085	0.0561395	0.0666122	0.0148107
ath-miR2111b-3p	0	0	0	0	0	0.0633959	0.031698	0.0448277	0.0385425	0	0.0192713	0.0272537
ath-miR2111b-5p	0	0	0	0	0.0913999	0.031698	0.061549	0.0422156	0.077085	0.0561395	0.0666122	0.0148107
ath-miR2112-3p	0.764158	0.538471	0.651315	0.159585	0.0457	0.095094	0.070397	0.0349268	0.192712	0.392977	0.292845	0.141609
ath-miR2112-5p	0	0	0	0	0	0	0	0	0	0	0	0
ath-miR2933a	0	0	0	0	0	0	0	0	0	0	0	0
ath-miR2933b	0	0	0	0	0	0	0	0	0	0	0	0
ath-miR2934-3p	0	0	0	0	0	0.0633959	0.031698	0.0448277	0	0	0	0
ath-miR2934-5p	0.254719	0.35898	0.306849	0.0737237	0.0457	0.031698	0.038699	0.00990091	0.077085	0.0561395	0.0666122	0.0148107
ath-miR2936	0	0	0	0	0.0457	0	0.02285	0.0323148	0	0	0	0
ath-miR2939	0	0	0	0	0	0	0	0	0	0	0	0
ath-miR319a	1574.42	2712.28	2143.35	804.591	245.729	484.504	365.116	168.84	258.466	286.087	272.276	19.531
ath-miR319b	1574.42	2712.28	2143.35	804.591	245.729	484.504	365.116	168.84	258.466	286.087	272.276	19.531
ath-miR319c	4817	10778.6	7797.79	4215.48	457.183	880.19	668.686	299.111	236.304	261.778	249.041	18.0131
ath-miR3434-3p	0	0	0	0	0	0	0	0	0	0	0	0
ath-miR3434-5p	0	0	0	0	0	0	0	0	0	0	0	0
ath-miR3440b-3p	11.4624	5.5642	8.51329	4.17064	0.6398	1.33131	0.985557	0.488974	0.192713	0.505255	0.348984	0.221001
ath-miR3440b-5p	0	0.17949	0.089745	0.126919	0.2285	0.380376	0.304438	0.107393	0.231255	0.168419	0.199837	0.0444314
ath-miR390a-3p	56.0382	38.4109	47.2245	12.4644	1.371	4.21583	2.79341	2.0116	0.539594	0.392977	0.466286	0.103674
ath-miR390a-5p	6.87742	5.02573	5.95158	1.30934	4.3415	8.87543	6.60846	3.20597	5.01052	6.73675	5.87363	1.22063
ath-miR390b-3p	3.05664	2.87184	2.96424	0.130671	0.3656	0.63396	0.49978	0.189759	0.115627	0.0561395	0.0858835	0.0420644
ath-miR390b-5p	6.87742	5.02573	5.95158	1.30934	4.3415	8.87543	6.60846	3.20597	5.01052	6.73675	5.87363	1.22063
ath-miR391-3p	0	0	0	0	0	0.0633959	0.031698	0.0448277	0	0	0	0
ath-miR391-5p	7.64159	16.6926	12.1671	6.40001	5.3469	14.169	9.75793	6.23814	12.1409	13.6981	12.9195	1.10111
ath-miR3932a	0	0	0	0	0	0	0	0	0	0	0	0
ath-miR3932b-3p	0	0	0	0	0	0	0	0	0	0	0	0
ath-miR3932b-5p	2725.5	3777.55	3251.53	743.913	97.8436	246.8	172.322	105.328	38.8509	34.8626	36.8567	2.82012
ath-miR3933	0	0	0	0	0	0	0	0	0	0	0	0
ath-miR393a-3p	0.764158	1.25643	1.01029	0.348089	0.0457	0.190188	0.117944	0.102168	0.0385425	0.168419	0.103481	0.0918366
ath-miR393a-5p	74.6327	45.5906	60.1116	20.5359	4.4786	8.55845	6.51853	2.88489	8.74914	9.76828	9.25871	0.720642
ath-miR393b-3p	59.3496	46.4881	52.9188	9.09449	7.0378	11.3479	9.19284	3.04768	5.12615	4.5473	4.83673	0.409309
ath-miR393b-5p	74.6327	45.5906	60.1116	20.5359	4.4786	8.55845	6.51853	2.88489	8.74914	9.76828	9.25871	0.720642
ath-miR394a	58.8401	62.6422	60.7412	2.68844	80.1577	149.234	114.696	48.8441	105.144	146.412	125.778	29.1812
ath-miR394b-3p	0	0	0	0	0	0	0	0	0	0	0	0
ath-miR394b-5p	58.8401	62.6422	60.7412	2.68844	80.1577	149.234	114.696	48.8441	105.144	146.412	125.778	29.1812
ath-miR395a	1628.93	996.71	1312.82	447.05	85.596	257.229	171.413	121.363	31.9517	31.8873	31.9195	0.0455447
ath-miR395b	3515.89	2412.89	2964.39	779.946	96.0156	262.84	179.428	117.962	14.7233	13.3612	14.0422	0.9631
ath-miR395c	3515.89	2412.89	2964.39	779.946	96.0156	262.84	179.428	117.962	14.7233	13.3612	14.0422	0.9631
ath-miR395d	1628.93	996.71	1312.82	447.05	85.596	257.229	171.413	121.363	31.9517	31.8873	31.9195	0.0455447
ath-miR395e	1628.93	996.71	1312.82	447.05	85.596	257.229	171.413	121.363	31.9517	31.8873	31.9195	0.0455447
ath-miR395f	3515.89	2412.89	2964.39	779.946	96.0156	262.84	179.428	117.962	14.7233	13.3612	14.0422	0.9631
ath-miR396a-3p	672.205	286.646	479.425	272.631	19.6967	30.3666	25.0317	7.54478	12.1409	7.41041	9.77565	3.34495
ath-miR396a-5p	4743.64	5107.04	4925.34	256.966	740.294	1590.6	1165.45	601.26	633.87	705.674	669.772	50.7731
ath-miR396b-3p	125.831	57.7959	91.8136	48.1083	10.6024	16.2928	13.4476	4.02371	8.9804	7.29814	8.13927	1.18953
ath-miR396b-5p	15738.6	18667.8	17203.2	2071.23	2793.64	6477.83	4635.74	2605.11	2247.99	2296.16	2272.08	34.058
ath-miR397a	12.2265	12.3849	12.3057	0.111977	3.199	8.78033	5.98967	3.9466	4.39384	5.50167	4.94776	0.783351
ath-miR397b	9.1699	8.25656	8.71323	0.645827	1.2339	2.53584	1.88487	0.920607	4.3553	5.50167	4.92849	0.810607
ath-miR398a-3p	3660.32	4787.55	4223.93	797.076	358.379	579.661	469.02	156.47	269.643	377.707	323.675	76.4124
ath-miR398a-5p	0	0	0	0	0	0	0	0	0	0	0	0
ath-miR398b-3p	48454	63061.2	55757.6	10328.9	3468.59	7303.62	5386.1	2711.78	2386.58	3110.24	2748.41	511.701
ath-miR398b-5p	0	0	0	0	0.0457	0.0633959	0.0545479	0.0125129	0.0385425	0	0.0192713	0.0272537
ath-miR398c-3p	48454	63061.2	55757.6	10328.9	3468.59	7303.62	5386.1	2711.78	2386.58	3110.24	2748.41	511.701
ath-miR398c-5p	0	0	0	0	0.0457	0.0633959	0.0545479	0.0125129	0.0385425	0	0.0192713	0.0272537
ath-miR399a	0.764158	0.53847	0.651314	0.159586	0.2285	0.792449	0.510474	0.398772	0.346882	0.392977	0.369929	0.0325937
ath-miR399b	54.2552	77.8988	66.077	16.7185	12.0648	22.8225	17.4437	7.60686	11.2544	9.20688	10.2306	1.44781
ath-miR399c-3p	54.2552	77.8988	66.077	16.7185	12.0648	22.8225	17.4437	7.60686	11.2544	9.20688	10.2306	1.44781
ath-miR399c-5p	0	0	0	0	0	0	0	0	0	0	0	0
ath-miR399d	0.509439	0.35898	0.43421	0.106391	0	0.443772	0.221886	0.313794	0.269796	0.729815	0.499806	0.325282
ath-miR399e	0.254719	0.17949	0.217104	0.0531949	0	0.063396	0.031698	0.0448277	0.15417	0.0561395	0.105155	0.069318
ath-miR399f	0	0.35898	0.17949	0.253837	0.0457	0.221886	0.133793	0.124582	0.385425	0.392977	0.389201	0.00534007
ath-miR400	2.29247	1.25643	1.77445	0.732589	0.2742	0.63396	0.45408	0.254389	0.61668	0.785954	0.701317	0.119695
ath-miR402	23.4342	22.0773	22.7557	0.959472	2.0108	3.32829	2.66954	0.931605	1.38753	1.23507	1.3113	0.107804
ath-miR403-3p	3466.47	2958	3212.24	359.544	356.232	851.724	603.978	350.366	438.845	504.75	471.798	46.6023
ath-miR403-5p	79.9818	66.4115	73.1967	9.59569	17.7316	34.2972	26.0144	11.7136	16.1878	13.8103	14.999	1.68116
ath-miR404	0	0	0	0	0.2285	0.126792	0.177646	0.0719184	0.269797	0.224558	0.247177	0.0319888
ath-miR406	0	0	0	0	0.0457	0	0.02285	0.0323148	0.077085	0	0.0385425	0.0545073
ath-miR408-3p	16024.1	16344.6	16184.4	226.626	987.988	1963.6	1475.79	689.861	419.65	435.642	427.646	11.3081
ath-miR408-5p	2581.08	1215.33	1898.2	965.731	117.038	262.301	189.669	102.717	66.1389	67.6481	66.8935	1.06713
ath-miR419	0	0	0	0	0	0	0	0	0.0385425	0	0.0192713	0.0272537
ath-miR4221	0	0.897452	0.448726	0.634594	0.1828	0.190188	0.186494	0.0052241	0.15417	0	0.077085	0.109015
ath-miR4227	0	0	0	0	0.0457	0	0.02285	0.0323148	0	0.0561395	0.0280698	0.0396966
ath-miR4228-3p	4.33023	4.12827	4.22925	0.142805	0.0457	0.412074	0.228887	0.259065	0.15417	0.0561395	0.105155	0.069318
ath-miR4228-5p	0	0	0	0	0.0457	0	0.02285	0.0323148	0	0	0	0
ath-miR4239	0	0	0	0	0	0	0	0	0	0	0	0
ath-miR4243	0	0	0	0	0	0.031698	0.015849	0.0224139	0.0385425	0	0.0192713	0.0272537
ath-miR4245	0	0	0	0	0.0457	0	0.02285	0.0323148	0	0	0	0
ath-miR447a-3p	237.399	262.056	249.727	17.4353	22.0274	55.7567	38.892	23.8502	5.93554	6.45605	6.1958	0.368053
ath-miR447a.2-3p	147.737	222.209	184.973	52.6598	13.4358	34.6775	24.0567	15.0202	24.7828	31.382	28.0824	4.66632
ath-miR447b	237.399	262.056	249.727	17.4353	22.0274	55.7567	38.892	23.8502	5.93554	6.45605	6.1958	0.368053
ath-miR447c-3p	0	0	0	0	0	0.031698	0.015849	0.0224139	0	0	0	0
ath-miR447c-5p	0	0	0	0	0	0	0	0	0	0	0	0
ath-miR472-3p	245.805	172.669	209.237	51.7144	19.6053	60.1945	39.8999	28.7009	23.3953	22.0628	22.729	0.942203
ath-miR472-5p	0.509438	0	0.254719	0.360227	0.0457	0.063396	0.054548	0.012513	0	0.0561395	0.0280698	0.0396966
ath-miR5012	23.4342	28.18	25.8071	3.35578	10.1911	18.7652	14.4781	6.06278	4.58655	6.06307	5.32481	1.04406
ath-miR5013	0.254719	0	0.127359	0.180114	0	0.031698	0.015849	0.0224139	0	0	0	0
ath-miR5014a-3p	0	0.17949	0.089745	0.126919	0	0	0	0	0	0	0	0
ath-miR5014a-5p	0	0	0	0	0	0	0	0	0	0	0	0
ath-miR5014b	0	0	0	0	0	0	0	0	0	0	0	0
ath-miR5019	0	0	0	0	0	0.031698	0.015849	0.0224139	0	0	0	0
ath-miR5020a	0.509438	0	0.254719	0.360227	0	0	0	0	0	0	0	0
ath-miR5020b	0	0	0	0	0	0	0	0	0	0	0	0
ath-miR5020c	0.254719	0.538471	0.396595	0.200643	0	0	0	0	0	0	0	0
ath-miR5023	0	0	0	0	0	0.031698	0.015849	0.0224139	0	0	0	0
ath-miR5024-3p	38.972	40.2059	39.5889	0.872464	1.7823	4.27923	3.03076	1.76559	0.46251	0.392977	0.427743	0.0491673
ath-miR5024-5p	0	0	0	0	0	0	0	0	0	0	0	0
ath-miR5026	277.898	280.005	278.952	1.48972	28.5625	55.63	42.0962	19.1396	20.3505	23.5786	21.9645	2.28265
ath-miR5027	0	0.17949	0.089745	0.126919	0	0	0	0	0.077085	0	0.0385425	0.0545073
ath-miR5028	0.509438	1.25643	0.882935	0.528205	0.3199	0.380376	0.350138	0.0427631	0.154169	0.280698	0.217434	0.0894692
ath-miR5029	0	0	0	0	0	0	0	0	0	0	0	0
ath-miR5595a	0.509439	0.358981	0.43421	0.10639	0.0457	0.0950939	0.0703969	0.0349268	0	0.0561395	0.0280698	0.0396966
ath-miR5629	3.05664	0.897452	1.97705	1.52678	0.0914	0.570564	0.330982	0.33882	0.192713	0.112279	0.152496	0.0568751
ath-miR5631	0	0	0	0	0.0457	0.126792	0.086246	0.0573407	0	0	0	0
ath-miR5632-3p	1.2736	0.358981	0.816291	0.646733	0	0.221886	0.110943	0.156897	0	0	0	0
ath-miR5632-5p	0.254719	0	0.127359	0.180114	0	0.15849	0.079245	0.112069	0.15417	0.0561395	0.105155	0.069318
ath-miR5633	0	0	0	0	0	0	0	0	0.0385425	0	0.0192713	0.0272537
ath-miR5634	0	0	0	0	0	0	0	0	0	0	0	0
ath-miR5635a	0	0	0	0	0	0	0	0	0	0	0	0
ath-miR5635b	0	0	0	0	0	0	0	0	0	0	0	0
ath-miR5635c	0	0	0	0	0	0	0	0	0	0	0	0
ath-miR5635d	0	0	0	0	0	0	0	0	0	0	0	0
ath-miR5636	0	0	0	0	0	0	0	0	0	0	0	0
ath-miR5637	2.03775	1.43592	1.73684	0.425556	0.5027	1.04603	0.774366	0.384195	0.385425	0.392977	0.389201	0.00534042
ath-miR5638a	0.254719	0	0.127359	0.180114	0	0	0	0	0.0385425	0	0.0192713	0.0272537
ath-miR5638b	0	0	0	0	0.0914	0.221886	0.156643	0.0922675	0.0385425	0	0.0192713	0.0272537
ath-miR5639-3p	0	0	0	0	0	0	0	0	0	0	0	0
ath-miR5639-5p	0	0.717962	0.358981	0.507676	0.0913999	0.063396	0.0773979	0.0198017	0.0385425	0.0561395	0.047341	0.012443
ath-miR5640	7.8963	8.25656	8.07643	0.254744	0.2742	1.5849	0.92955	0.926804	0.192712	0.336837	0.264775	0.101912
ath-miR5641	0.509439	0.35898	0.43421	0.106391	0	0.0950939	0.0475469	0.0672415	0	0.112279	0.0561395	0.0793932
ath-miR5642a	20.887	30.3339	25.6104	6.67998	48.4877	116.427	82.4572	48.0401	13.9138	14.9893	14.4515	0.760473
ath-miR5642b	20.887	30.3339	25.6104	6.67998	48.4877	116.427	82.4572	48.0401	13.9138	14.9893	14.4515	0.760473
ath-miR5643a	0	0.538471	0.269236	0.380756	0.0457	0.126792	0.086246	0.0573406	0	0	0	0
ath-miR5643b	0	0.538471	0.269236	0.380756	0.0457	0.126792	0.086246	0.0573406	0	0	0	0
ath-miR5644	0	0.17949	0.089745	0.126919	0	0	0	0	0	0	0	0
ath-miR5645a	0	0	0	0	0	0	0	0	0	0	0	0
ath-miR5645b	0	0	0	0	0	0	0	0	0	0	0	0
ath-miR5645c	0	0	0	0	0	0.031698	0.015849	0.0224139	0	0	0	0
ath-miR5645d	0	0	0	0	0	0	0	0	0	0	0	0
ath-miR5645e	0	0	0	0	0	0	0	0	0	0	0	0
ath-miR5645f	0	0	0	0	0	0	0	0	0	0	0	0
ath-miR5646	0	0	0	0	0	0	0	0	0	0	0	0
ath-miR5647	0.254719	0.17949	0.217104	0.0531949	0.0457	0.126792	0.086246	0.0573406	0.077085	0	0.0385425	0.0545073
ath-miR5648-3p	0	0	0	0	0	0	0	0	0	0	0	0
ath-miR5648-5p	1.78304	2.33337	2.05821	0.389145	0.5941	1.01434	0.804218	0.297152	0.501052	0.785953	0.643503	0.201455
ath-miR5649a	0	0	0	0	0	0	0	0	0	0	0	0
ath-miR5649b	0	0	0	0	0	0	0	0	0	0	0	0
ath-miR5650	34.1324	28.0005	31.0665	4.33591	1.9194	5.42035	3.66988	2.47555	1.42607	1.29121	1.35864	0.0953587
ath-miR5651	14.2643	13.8208	14.0425	0.313621	1.1882	3.83545	2.51183	1.87189	1.23336	1.40349	1.31842	0.120297
ath-miR5652	3.05663	3.23083	3.14373	0.123179	0.7312	1.83848	1.28484	0.782965	0.269797	0.112279	0.191038	0.111382
ath-miR5653	3.05663	3.94879	3.50271	0.630853	0.1828	0.221886	0.202343	0.027638	0.077085	0	0.0385425	0.0545073
ath-miR5654-3p	84.3121	62.6421	73.4771	15.323	28.334	46.184	37.259	12.6218	8.78768	10.049	9.41833	0.891868
ath-miR5654-5p	0	0	0	0	0	0.031698	0.015849	0.0224139	0	0	0	0
ath-miR5655	0	0	0	0	0	0	0	0	0	0	0	0
ath-miR5656	0	0	0	0	0	0.031698	0.015849	0.0224139	0.0385425	0	0.0192713	0.0272537
ath-miR5657	0.509439	0.538471	0.523955	0.0205287	0.1371	0.348678	0.242889	0.149608	0.269797	0.168418	0.219108	0.0716854
ath-miR5658	0	0	0	0	0.0457	0	0.02285	0.0323148	0	0.0561395	0.0280698	0.0396966
ath-miR5659	0	0	0	0	0	0	0	0	0	0	0	0
ath-miR5660	0	0	0	0	0	0.031698	0.015849	0.0224139	0	0	0	0
ath-miR5661	0	0	0	0	0	0	0	0	0	0	0	0
ath-miR5662	0	0	0	0	0	0	0	0	0	0	0	0
ath-miR5663-3p	0	0	0	0	0.0457	0	0.02285	0.0323148	0	0	0	0
ath-miR5663-5p	0	0	0	0	0	0	0	0	0.0385425	0	0.0192713	0.0272537
ath-miR5664	0	0	0	0	0	0	0	0	0	0	0	0
ath-miR5665	0.254719	0	0.127359	0.180114	0.0457	0	0.02285	0.0323148	0	0	0	0
ath-miR5666	0	0	0	0	0	0	0	0	0	0	0	0
ath-miR5995b	0.509439	0.358981	0.43421	0.10639	0.0457	0.0950939	0.0703969	0.0349268	0	0.0561395	0.0280698	0.0396966
ath-miR5996	136.275	142.336	139.305	4.28587	7.769	18.8603	13.3146	7.8427	7.74703	6.62447	7.18575	0.79377
ath-miR5997	0.509439	0	0.254719	0.360228	0.0913999	0.0950939	0.0932469	0.00261205	0	0.0561395	0.0280698	0.0396966
ath-miR5998a	0	0	0	0	0	0	0	0	0	0	0	0
ath-miR5998b	0	0	0	0	0	0	0	0	0	0	0	0
ath-miR5999	0.254719	0	0.127359	0.180114	0	0.0633959	0.031698	0.0448277	0	0	0	0
ath-miR771	1.52832	1.07694	1.30263	0.319172	0.0913999	0.348678	0.220039	0.181923	0.192712	0.168418	0.180565	0.0171781
ath-miR773a	38.2079	35.0006	36.6043	2.2679	16.6348	37.8474	27.2411	14.9996	42.4353	50.5817	46.5085	5.76037
ath-miR773b-3p	0.254719	0	0.127359	0.180114	0.1371	0.0950939	0.116097	0.0297028	0.077085	0	0.0385425	0.0545073
ath-miR774a	0	0	0	0	0	0	0	0	0	0	0	0
ath-miR775	389.721	346.776	368.248	30.3667	60.6439	85.3626	73.0033	17.4788	28.059	28.575	28.317	0.364888
ath-miR776	0	0	0	0	0	0	0	0	0	0	0	0
ath-miR777	0	0	0	0	0.0913999	0.31698	0.20419	0.159509	1.42607	2.47014	1.9481	0.738265
ath-miR778	0	0	0	0	0	0	0	0	0	0	0	0
ath-miR779.1	0.764158	0.358981	0.56157	0.286503	0.2285	0.919241	0.57387	0.488428	0.423967	0.729814	0.576891	0.216266
ath-miR779.2	5.60383	6.10267	5.85325	0.352735	2.1936	5.45205	3.82282	2.30407	4.62509	4.49116	4.55813	0.0947049
ath-miR780.1	4.33023	3.94879	4.13951	0.269717	0.1371	0.443772	0.290436	0.21685	0.077085	0.168419	0.122752	0.0645829
ath-miR780.2	0.509438	0.538471	0.523954	0.0205294	0.1828	0.126792	0.154796	0.0396036	0.115627	0.168419	0.142023	0.0373292
ath-miR781a	47.3777	71.9756	59.6767	17.3933	7.769	15.6905	11.7297	5.60134	8.55643	8.36479	8.46061	0.135508
ath-miR781b	47.3777	71.9756	59.6767	17.3933	7.769	15.6905	11.7297	5.60134	8.55643	8.36479	8.46061	0.135508
ath-miR782	0	0	0	0	0	0	0	0	0	0	0	0
ath-miR8121	0	0	0	0	0	0	0	0	0	0	0	0
ath-miR8165	0	0	0	0	0	0	0	0	0	0	0	0
ath-miR8166	0	0	0	0	0.0457	0	0.02285	0.0323148	0	0	0	0
ath-miR8167a	0	0	0	0	0	0	0	0	0	0	0	0
ath-miR8167b	0	0	0	0	0	0	0	0	0	0	0	0
ath-miR8167c	0	0	0	0	0	0	0	0	0	0	0	0
ath-miR8167d	0	0	0	0	0	0	0	0	0	0	0	0
ath-miR8167e	0	0	0	0	0	0	0	0	0	0	0	0
ath-miR8167f	0	0	0	0	0	0	0	0	0	0	0	0
ath-miR8168	0	0	0	0	0	0.031698	0.015849	0.0224139	0	0	0	0
ath-miR8169	0	0	0	0	0	0	0	0	0.0385425	0	0.0192713	0.0272537
ath-miR8170-3p	1.01888	0.17949	0.599183	0.593536	0	0.063396	0.031698	0.0448277	0.0385425	0	0.0192713	0.0272537
ath-miR8170-5p	0	0	0	0	0	0	0	0	0	0	0	0
ath-miR8171	0	0	0	0	0.0457	0	0.02285	0.0323148	0	0	0	0
ath-miR8172	0	0	0	0	0	0	0	0	0	0	0	0
ath-miR8173	0	0	0	0	0	0	0	0	0	0	0	0
ath-miR8174	0	0	0	0	0	0	0	0	0	0	0	0
ath-miR8175	0	0	0	0	0	0	0	0	0	0	0	0
ath-miR8177	0	0	0	0	0	0	0	0	0	0	0	0
ath-miR8178	0	0	0	0	0	0	0	0	0	0	0	0
ath-miR8179	0	0.717961	0.358981	0.507675	0.2285	0.285282	0.256891	0.040151	0.231255	0.112279	0.171767	0.0841287
ath-miR8180	0.254719	0	0.127359	0.180114	0.0457	0.0950939	0.0703969	0.0349268	0	0	0	0
ath-miR8181	0	0	0	0	0	0	0	0	0	0	0	0
ath-miR8182	2.80191	1.61541	2.20866	0.83898	0.2742	0.79245	0.533325	0.366458	0.346882	0.168419	0.257651	0.126193
ath-miR8183	13.5001	7.71808	10.6091	4.08853	0.7769	2.28226	1.52958	1.06445	0.423967	0.449116	0.436542	0.0177834
ath-miR8184	2.29248	2.15388	2.22318	0.0980029	0.0457	0.15849	0.102095	0.0797546	0	0.0561395	0.0280698	0.0396966
ath-miR822-3p	8.66046	4.48726	6.57386	2.95089	0.868299	2.06037	1.46433	0.842918	2.04275	2.18944	2.1161	0.103726
ath-miR822-5p	27.0003	24.0517	25.526	2.08492	16.9547	33.7583	25.3565	11.882	24.4745	27.2276	25.8511	1.94677
ath-miR823	103.161	61.5653	82.3633	29.4128	5.7125	13.5667	9.63962	5.55378	1.85004	2.13331	1.99167	0.200302
ath-miR824-3p	0.509438	0.17949	0.344464	0.233308	0.2285	0.126792	0.177646	0.0719185	0.192713	0.505256	0.348985	0.221002
ath-miR824-5p	20.6322	24.0517	22.342	2.4179	2.6049	4.08904	3.34697	1.04945	5.6272	6.9613	6.29425	0.943354
ath-miR825	155.379	122.951	139.165	22.9299	17.2746	35.8504	26.5625	13.1351	20.6973	21.3892	21.0433	0.489225
ath-miR826a	0	0.17949	0.089745	0.126919	0	0	0	0	0.0385425	0.0561395	0.047341	0.012443
ath-miR826b	0	0	0	0	0	0	0	0	0	0	0	0
ath-miR827	3.31135	3.41032	3.36084	0.0699852	0.3656	0.697356	0.531478	0.234587	0.770849	0.729814	0.750331	0.0290161
ath-miR828	0.509439	0.538471	0.523955	0.0205287	0.0457	0.348678	0.197189	0.214238	0.192712	0.224558	0.208635	0.0225189
ath-miR829-3p.1	0	0	0	0	0	0	0	0	0.0385425	0	0.0192713	0.0272537
ath-miR829-3p.2	1.01888	1.43592	1.2274	0.294894	0.0914	0.31698	0.20419	0.159509	0.308339	0.168418	0.238379	0.0989391
ath-miR829-5p	0.254719	0.897452	0.576086	0.454481	0.0457	0.190188	0.117944	0.102168	0.231255	0.224558	0.227906	0.00473514
ath-miR830-3p	0	0.717962	0.358981	0.507676	0	0.031698	0.015849	0.0224139	0	0.168418	0.0842092	0.11909
ath-miR830-5p	0.254719	0.17949	0.217104	0.0531949	0.0457	0.0950939	0.0703969	0.0349268	0	0.224558	0.112279	0.158786
ath-miR831-3p	156.652	141.438	149.045	10.7578	2.8791	6.3079	4.5935	2.42452	0.847935	0.729814	0.788874	0.0835242
ath-miR831-5p	0	0	0	0	0	0	0	0	0	0	0	0
ath-miR832-3p	0	0	0	0	0	0	0	0	0	0	0	0
ath-miR832-5p	0	0	0	0	0	0	0	0	0	0	0	0
ath-miR833a-3p	0	0.17949	0.089745	0.126919	0.0913999	0.0950939	0.0932469	0.00261205	0	0	0	0
ath-miR833a-5p	24.9625	33.0262	28.9944	5.7019	1.9194	5.26186	3.59063	2.36348	1.11773	0.898232	1.00798	0.15521
ath-miR833b	1.52832	2.87184	2.20008	0.950017	0.1828	0.570564	0.376682	0.27419	0.423967	0.224558	0.324263	0.141003
ath-miR834	0	0.17949	0.089745	0.126919	0.0457	0.031698	0.038699	0.00990091	0	0	0	0
ath-miR835-3p	0.254719	0.358981	0.30685	0.0737244	0	0.031698	0.015849	0.0224139	0	0	0	0
ath-miR835-5p	0.254719	0	0.127359	0.180114	0	0.126792	0.063396	0.0896554	0.077085	0.0561395	0.0666122	0.0148107
ath-miR836	0	0	0	0	0.0457	0.031698	0.038699	0.00990091	0	0	0	0
ath-miR837-3p	0	0.17949	0.089745	0.126919	0.0914	0.15849	0.124945	0.0474397	0	0	0	0
ath-miR837-5p	0.254719	0.358981	0.30685	0.0737244	0.0457	0.0950939	0.0703969	0.0349268	0	0.0561395	0.0280698	0.0396966
ath-miR838	25.7266	15.2567	20.4917	7.40334	4.1587	8.24147	6.20009	2.88696	3.43028	3.76135	3.59581	0.234098
ath-miR839-5p	2.80191	1.43592	2.11891	0.965899	2.2393	6.2128	4.22605	2.80969	2.08129	2.41399	2.24764	0.235254
ath-miR840-3p	42.2834	30.8724	36.5779	8.06879	4.7985	13.7252	9.26186	6.31215	5.16469	5.55782	5.36125	0.277981
ath-miR840-5p	0.764158	0.717962	0.74106	0.0326655	0.0914	0.253584	0.172492	0.114681	0.077085	0.0561395	0.0666122	0.0148107
ath-miR841a-3p	12.736	12.9233	12.8296	0.132484	1.5538	3.96224	2.75802	1.70303	0.346882	0.280697	0.31379	0.0467999
ath-miR841a-5p	9.1699	10.231	9.70043	0.75029	1.0968	3.01131	2.05405	1.35376	1.58024	1.74032	1.66028	0.113195
ath-miR841b-3p	27.0002	17.7695	22.3849	6.5271	1.1425	2.25055	1.69653	0.783513	0.308339	0.168419	0.238379	0.0989387
ath-miR841b-5p	1.78303	1.25643	1.51973	0.372365	0.2285	0.380376	0.304438	0.107393	0.154169	0.112279	0.133224	0.0296211
ath-miR842	1.2736	2.33337	1.80348	0.749371	0.6855	1.23622	0.960861	0.389419	0.693765	0.617535	0.65565	0.0539027
ath-miR843	777.913	598.96	688.437	126.539	15.8122	41.4293	28.6207	18.114	5.1647	4.60344	4.88407	0.396869
ath-miR844-3p	1.01888	0.717962	0.868419	0.212779	0.3656	0.570564	0.468082	0.144931	0.847935	1.45963	1.15378	0.432531
ath-miR844-5p	0	0	0	0	0	0.0950939	0.0475469	0.0672415	0.0385425	0	0.0192713	0.0272537
ath-miR845a	503.325	890.991	697.158	274.121	31.3959	67.3899	49.3929	25.4516	11.8326	11.5086	11.6706	0.229093
ath-miR845b	9.1699	12.3848	10.7774	2.27328	0.4113	0.982637	0.696968	0.403996	0.231254	0.168419	0.199837	0.0444311
ath-miR846-3p	385.39	562.702	474.046	125.379	107.212	225.626	166.419	83.7313	229.983	239.042	234.513	6.40569
ath-miR846-5p	33.8777	35.7186	34.7982	1.30176	5.0727	9.73128	7.40199	3.29411	3.46882	4.2666	3.86771	0.564118
ath-miR847	14.519	7.71808	11.1185	4.80897	1.6452	2.59924	2.12222	0.674607	1.81149	2.02103	1.91626	0.148162
ath-miR848	8.15101	6.82064	7.48583	0.940712	3.8388	6.08601	4.96241	1.58902	1.96567	1.62805	1.79686	0.238734
ath-miR849	0	0	0	0	0	0	0	0	0	0	0	0
ath-miR850	330.881	432.751	381.816	72.0331	5.1184	14.486	9.80219	6.62388	3.93133	4.09818	4.01476	0.117984
ath-miR851-3p	0.254719	0.17949	0.217104	0.0531949	0	0.0950939	0.0475469	0.0672415	0	0	0	0
ath-miR851-5p	0.764158	0.17949	0.471824	0.413423	0.1828	0.126792	0.154796	0.0396037	0.077085	0.112279	0.094682	0.0248859
ath-miR852	0	0	0	0	0.1371	0.253584	0.195342	0.0823666	0.0385425	0.0561395	0.047341	0.012443
ath-miR853	0.764158	1.7949	1.27953	0.728847	0.0914	0.443772	0.267586	0.249164	0.423967	0.505256	0.464612	0.0574796
ath-miR855	0	0	0	0	0	0	0	0	0	0	0	0
ath-miR856	0	0	0	0	0	0.031698	0.015849	0.0224139	0	0	0	0
ath-miR857	12.9907	12.2053	12.598	0.555311	3.7474	7.7343	5.74085	2.81916	1.77295	2.24558	2.00927	0.3342
ath-miR858a	50.1797	80.5912	65.3854	21.5042	27.2372	45.3915	36.3143	12.837	48.3323	53.3887	50.8605	3.57545
ath-miR858b	19.104	23.3337	21.2188	2.9909	9.96259	14.3909	12.1767	3.13127	13.5669	16.898	15.2325	2.35545
ath-miR859	1.2736	1.07694	1.17527	0.139056	0.2285	1.01434	0.621418	0.55567	0.192712	0.224558	0.208635	0.0225185
ath-miR860	1.2736	3.41032	2.34196	1.51089	0.2742	0.348678	0.311439	0.0526638	0.077085	0.336838	0.206961	0.183673
ath-miR861-3p	0	0	0	0	0	0	0	0	0	0	0	0
ath-miR861-5p	0	0	0	0	0	0	0	0	0	0	0	0
ath-miR862-3p	0	0	0	0	0	0	0	0	0	0	0	0
ath-miR862-5p	5.09439	5.5642	5.3293	0.332209	0.5941	1.83848	1.21629	0.87991	0.732307	0.673674	0.702991	0.0414594
ath-miR863-3p	1.78304	0.717962	1.2505	0.753123	0.2285	0.285282	0.256891	0.0401509	0.30834	0.112279	0.21031	0.138636
ath-miR863-5p	13.7548	24.9491	19.352	7.91556	2.0565	3.58188	2.81919	1.0786	1.61878	1.62805	1.62342	0.00654922
ath-miR864-3p	0	0	0	0	0	0	0	0	0	0.112279	0.0561395	0.0793932
ath-miR864-5p	0.764158	2.33337	1.54876	1.1096	0.3199	0.47547	0.397685	0.110005	0.231255	0.280697	0.255976	0.0349611
ath-miR865-3p	0	0	0	0	0	0	0	0	0	0.0561395	0.0280698	0.0396966
ath-miR865-5p	0.254719	0	0.127359	0.180114	0.0457	0.031698	0.038699	0.00990091	0	0.0561395	0.0280698	0.0396966
ath-miR866-3p	0.509438	0.358981	0.434209	0.106389	0	0.0633959	0.031698	0.0448277	0	0	0	0
ath-miR866-5p	0.254719	1.61541	0.935065	0.962155	0.2285	0.47547	0.351985	0.174634	0.269798	0.224558	0.247178	0.0319892
ath-miR868-3p	0	0	0	0	0	0	0	0	0	0	0	0
ath-miR868-5p	0.254719	0.717962	0.48634	0.327562	0	0.126792	0.0633959	0.0896553	0.115627	0.112279	0.113953	0.00236775
ath-miR869.1	0	0	0	0	0.0457	0	0.02285	0.0323148	0.0385425	0	0.0192713	0.0272537
ath-miR869.2	644.695	581.729	613.212	44.5236	11.6078	40.9539	26.2808	20.7508	2.23546	2.30172	2.26859	0.0468476
ath-miR870-3p	1.2736	0.358981	0.816291	0.646733	0.2285	0.190188	0.209344	0.0270907	0	0.112279	0.0561395	0.0793932
ath-miR870-5p	0.509439	0	0.254719	0.360228	0	0	0	0	0	0	0	0
miR156ij	14.0096	11.3079	12.6587	1.91037	0.7769	2.82112	1.79901	1.44548	0.809392	0.617535	0.713463	0.135663
miR159a-c	129012	133323	131168	3048.24	15523.9	35585.7	25554.8	14185.8	15231.6	15220.8	15226.2	7.66246
miR167abd	2150.85	1856.83	2003.84	207.902	1186.69	2180.57	1683.63	702.777	957.318	1024.72	991.017	47.657
miR169a-c	1.78303	2.15389	1.96846	0.262231	0.7312	0.570564	0.650882	0.113587	0.578137	0.561395	0.569766	0.011838
miR172a-d	4.83967	7.53859	6.18913	1.90843	5.8496	7.92449	6.88704	1.46717	7.93974	10.1051	9.02243	1.53115
miR319a-c	6354.99	13448.2	9901.57	5015.62	671.378	1310.27	990.823	451.764	489.682	541.577	515.629	36.6956
miR395a-f	5132.09	3396.67	4264.38	1227.13	180.515	517.565	349.04	238.33	46.1739	44.9678	45.5708	0.852835
miR396ab	17368	20457.1	18912.6	2184.3	3105.41	7070.87	5088.14	2804	2584.66	2680.83	2632.75	67.9984
miR398a-c	51861.6	67624.1	59742.8	11145.7	3789.72	7808.54	5799.13	2841.73	2628.13	3458.14	3043.13	586.902
miR399a-f	55.7836	78.7963	67.2899	16.2724	12.339	24.2172	18.2781	8.39918	12.2565	10.6104	11.4334	1.16399

## Sheet: AGO1 IP-Ratio-All
S4 Data. Composition of miRNA forms in AGO1 and AGO10 IP treated with SDN1 and SDN1 catalytic mutant (SDN1-D283A).
	AGO1 IP (Mock)								AGO1 IP (SDN1)								AGO1 IP (SDN1-D283A)
RPM	br1				br2				br1				br2				br1				br2
miRNAs	FL	TA-Only	TR-Only	TR-TA	FL	TA-Only	TR-Only	TR-TA	FL	TA-Only	TR-Only	TR-TA	FL	TA-Only	TR-Only	TR-TA	FL	TA-Only	TR-Only	TR-TA	FL	TA-Only	TR-Only	TR-TA
ath-miR156a-3p	0	0	0.5	0.5	0.5	0	0.5	0	0.75	0	0.25	0	1	0	0	0	0.749999	0	0.250001	0	#DIV/0!	#DIV/0!	#DIV/0!	#DIV/0!
ath-miR156a-5p	0.577071	0.0966456	0.206036	0.120248	0.59496	0.0951259	0.180672	0.129241	0.46648	0.0631978	0.337332	0.132991	0.483505	0.0540567	0.349165	0.113273	0.428628	0.0764067	0.351234	0.143732	0.435851	0.076293	0.344985	0.142871
ath-miR156b-3p	0.0732492	0.00501253	0.822481	0.0992577	0.0607213	0.00442758	0.822535	0.112316	0.499527	0.0137181	0.346736	0.140019	0.436913	0.0132707	0.440384	0.109432	0.622097	0.0282486	0.188323	0.161331	0.627246	0.0293282	0.174078	0.169348
ath-miR156b-5p	0.577071	0.0966456	0.206036	0.120248	0.59496	0.0951259	0.180672	0.129241	0.46648	0.0631978	0.337332	0.132991	0.483505	0.0540567	0.349165	0.113273	0.428628	0.0764067	0.351234	0.143732	0.435851	0.076293	0.344985	0.142871
ath-miR156c-3p	0	0	1	0	1	0	0	0	#DIV/0!	#DIV/0!	#DIV/0!	#DIV/0!	0.75	0	0	0.25	1	0	0	0	1	0	0	0
ath-miR156c-5p	0.577071	0.0966456	0.206036	0.120248	0.59496	0.0951259	0.180672	0.129241	0.46648	0.0631978	0.337332	0.132991	0.483505	0.0540567	0.349165	0.113273	0.428628	0.0764067	0.351234	0.143732	0.435851	0.076293	0.344985	0.142871
ath-miR156d-3p	#DIV/0!	#DIV/0!	#DIV/0!	#DIV/0!	#DIV/0!	#DIV/0!	#DIV/0!	#DIV/0!	#DIV/0!	#DIV/0!	#DIV/0!	#DIV/0!	#DIV/0!	#DIV/0!	#DIV/0!	#DIV/0!	#DIV/0!	#DIV/0!	#DIV/0!	#DIV/0!	#DIV/0!	#DIV/0!	#DIV/0!	#DIV/0!
ath-miR156d-5p	0.577071	0.0966456	0.206036	0.120248	0.59496	0.0951259	0.180672	0.129241	0.46648	0.0631978	0.337332	0.132991	0.483505	0.0540567	0.349165	0.113273	0.428628	0.0764067	0.351234	0.143732	0.435851	0.076293	0.344985	0.142871
ath-miR156e	0.577071	0.0966456	0.206036	0.120248	0.59496	0.0951259	0.180672	0.129241	0.46648	0.0631978	0.337332	0.132991	0.483505	0.0540567	0.349165	0.113273	0.428628	0.0764067	0.351234	0.143732	0.435851	0.076293	0.344985	0.142871
ath-miR156f-3p	#DIV/0!	#DIV/0!	#DIV/0!	#DIV/0!	#DIV/0!	#DIV/0!	#DIV/0!	#DIV/0!	#DIV/0!	#DIV/0!	#DIV/0!	#DIV/0!	#DIV/0!	#DIV/0!	#DIV/0!	#DIV/0!	#DIV/0!	#DIV/0!	#DIV/0!	#DIV/0!	#DIV/0!	#DIV/0!	#DIV/0!	#DIV/0!
ath-miR156f-5p	0.577071	0.0966456	0.206036	0.120248	0.59496	0.0951259	0.180672	0.129241	0.46648	0.0631978	0.337332	0.132991	0.483505	0.0540567	0.349165	0.113273	0.428628	0.0764067	0.351234	0.143732	0.435851	0.076293	0.344985	0.142871
ath-miR156g	0.558283	0.0797545	0.202454	0.159509	0.549784	0.0909091	0.225108	0.134199	0.382353	0.0588235	0.367647	0.191176	0.485075	0.0932835	0.332089	0.0895522	0.447368	0	0.342105	0.210526	0.314286	0.228571	0.371429	0.0857145
ath-miR156h	0	0.333334	0.5	0.166666	0	0.285714	0.428571	0.285714	0.5	0	0	0.5	0.166667	0.333333	0.333333	0.166667	0.2	0.4	0.2	0.2	0	0.5	0.5	0
ath-miR156i	0	0	0.666666	0.333334	0	0	0.52381	0.47619	0	0	0.75	0.25	0.0227273	0	0.749999	0.227273	0	0	0.714286	0.285714	0	0	0.666667	0.333333
ath-miR156j	0.5	0	0.291667	0.208333	0.490566	0	0.207547	0.301887	0.133333	0	0.4	0.466667	0.363637	0	0.428571	0.207793	0.238095	0	0.476191	0.285714	0.363636	0	0.363636	0.272728
ath-miR157a-3p	0.571428	0.142857	0.0714286	0.214286	0.736842	0.105263	0	0.157894	0.916667	0	0.0833333	0	0.833333	0	0.125	0.0416667	0.25	0.25	0.25	0.25	1	0	0	0
ath-miR157a-5p	0.189907	0.0168806	0.437665	0.355548	0.187823	0.0138249	0.440162	0.35819	0.196941	0.0202872	0.46161	0.321161	0.200868	0.0166465	0.513014	0.269472	0.221075	0.0317713	0.42494	0.322213	0.241165	0.0353403	0.40445	0.319045
ath-miR157b-3p	0.571428	0.142857	0.0714286	0.214286	0.736842	0.105263	0	0.157894	0.916667	0	0.0833333	0	0.833333	0	0.125	0.0416667	0.25	0.25	0.25	0.25	1	0	0	0
ath-miR157b-5p	0.189907	0.0168806	0.437665	0.355548	0.187823	0.0138249	0.440162	0.35819	0.196941	0.0202872	0.46161	0.321161	0.200868	0.0166465	0.513014	0.269472	0.221075	0.0317713	0.42494	0.322213	0.241165	0.0353403	0.40445	0.319045
ath-miR157c-3p	0.503448	0.151724	0.131035	0.213793	0.451613	0.096774	0.129032	0.322581	0.416667	0.0333333	0.383333	0.166667	0.466216	0.114865	0.182432	0.236487	0.322581	0.193548	0.129032	0.354838	0.368421	0.210526	0.157895	0.263158
ath-miR157c-5p	0.189907	0.0168806	0.437665	0.355548	0.187823	0.0138249	0.440162	0.35819	0.196941	0.0202872	0.46161	0.321161	0.200868	0.0166465	0.513014	0.269472	0.221075	0.0317713	0.42494	0.322213	0.241165	0.0353403	0.40445	0.319045
ath-miR157d	0.104167	0.0505952	0.321429	0.523809	0.0988236	0.0447059	0.324706	0.531764	0.0875575	0.0599077	0.327189	0.525346	0.0943059	0.0409252	0.448399	0.41637	0.109091	0.0454546	0.318181	0.527273	0.10241	0.0963856	0.349398	0.451807
ath-miR158a-3p	0.258122	0.0502514	0.309786	0.381841	0.274261	0.0473528	0.335986	0.342401	0.24719	0.0204512	0.507849	0.22451	0.270289	0.025104	0.482497	0.22211	0.316818	0.0501826	0.243991	0.389008	0.327794	0.0510674	0.229214	0.391924
ath-miR158a-5p	0.765152	0.116162	0.010101	0.108586	0.799435	0.09887	0.0112994	0.0903954	0.859649	0.0701754	0.0350877	0.0350877	0.857143	0.03125	0.0357143	0.0758929	0.766667	0.133333	0.0333333	0.0666667	0.652174	0.130435	0.0434782	0.173913
ath-miR158b	0.229826	0.0633298	0.301327	0.405517	0.285714	0.0592494	0.321264	0.333772	0.225291	0.0145349	0.572675	0.1875	0.277379	0.0267815	0.510282	0.185557	0.354581	0.0584331	0.264277	0.32271	0.357505	0.0522764	0.261383	0.328836
ath-miR159a	0.658671	0.0114199	0.24369	0.0862189	0.700489	0.0110549	0.216991	0.0714646	0.527187	0.0151096	0.382975	0.074728	0.553977	0.0144602	0.371531	0.0600311	0.511071	0.0201429	0.388191	0.0805955	0.528897	0.0194741	0.363617	0.0880112
ath-miR159b-3p	0.574658	0.0491926	0.24891	0.127239	0.611645	0.0524689	0.22489	0.110995	0.48554	0.0124362	0.403785	0.0982391	0.487926	0.0132093	0.410525	0.0883393	0.40284	0.0217583	0.449701	0.125701	0.404381	0.0212471	0.438221	0.136151
ath-miR159b-5p	0.75	0	0.1875	0.0625	1	0	0	0	0.833333	0	0	0.166667	0.916667	0	0	0.0833333	1	0	0	0	0.857143	0	0	0.142857
ath-miR159c	0.00836287	0.000841386	0.668724	0.322072	0.00997825	0.000806513	0.69482	0.294396	0.0097226	0.000350815	0.739695	0.250231	0.00630826	0.000329647	0.790959	0.202403	0.0122498	0.000618218	0.678528	0.308604	0.0170636	0.00098824	0.638898	0.34305
ath-miR160a-3p	#DIV/0!	#DIV/0!	#DIV/0!	#DIV/0!	#DIV/0!	#DIV/0!	#DIV/0!	#DIV/0!	1	0	0	0	#DIV/0!	#DIV/0!	#DIV/0!	#DIV/0!	#DIV/0!	#DIV/0!	#DIV/0!	#DIV/0!	#DIV/0!	#DIV/0!	#DIV/0!	#DIV/0!
ath-miR160a-5p	0.160047	0	0.398365	0.441589	0.213793	0.00106101	0.437135	0.348011	0.251348	0.0145631	0.590615	0.143474	0.331648	0.00869431	0.537306	0.122352	0.437878	0.0209399	0.392275	0.148907	0.47497	0.0160906	0.350417	0.158522
ath-miR160b	0.160047	0	0.398365	0.441589	0.213793	0.00106101	0.437135	0.348011	0.251348	0.0145631	0.590615	0.143474	0.331648	0.00869431	0.537306	0.122352	0.437878	0.0209399	0.392275	0.148907	0.47497	0.0160906	0.350417	0.158522
ath-miR160c-3p	#DIV/0!	#DIV/0!	#DIV/0!	#DIV/0!	1	0	0	0	0.5	0	0.5	0	0.4	0	0.6	0	#DIV/0!	#DIV/0!	#DIV/0!	#DIV/0!	0	0	1	0
ath-miR160c-5p	0.160047	0	0.398365	0.441589	0.213793	0.00106101	0.437135	0.348011	0.251348	0.0145631	0.590615	0.143474	0.331648	0.00869431	0.537306	0.122352	0.437878	0.0209399	0.392275	0.148907	0.47497	0.0160906	0.350417	0.158522
ath-miR161.1	0.85612	0.000362818	0.0174057	0.126112	0.888361	0.000434391	0.0128276	0.0983768	0.848038	0.0025829	0.0148996	0.13448	0.875273	0.00198873	0.0188463	0.103891	0.811033	0.00439921	0.017786	0.166782	0.787521	0.00527606	0.0167734	0.190429
ath-miR161.2	0.0671938	0.328063	0.16996	0.434783	0.0891365	0.289694	0.169916	0.451253	0.128205	0.205128	0.397436	0.269231	0.165339	0.231075	0.394422	0.209164	0.142307	0.230769	0.196154	0.430769	0.184357	0.189944	0.217877	0.407821
ath-miR162a-3p	0.80739	0.0149945	0.0521855	0.12543	0.757336	0.0211566	0.0568118	0.164696	0.655028	0.0280487	0.159154	0.157769	0.688548	0.0277252	0.148652	0.135075	0.613625	0.0612018	0.143917	0.181256	0.603157	0.0657585	0.141669	0.189415
ath-miR162a-5p	0.905967	0	0.0433997	0.050633	0.901216	0	0.0379939	0.0607902	0.916667	0.00347222	0.0173611	0.0624999	0.904982	0.00092251	0.0405904	0.0535055	0.854701	0.00854701	0.0512821	0.0854701	0.886792	0	0.0566039	0.0566039
ath-miR162b-3p	0.80739	0.0149945	0.0521855	0.12543	0.757336	0.0211566	0.0568118	0.164696	0.655028	0.0280487	0.159154	0.157769	0.688548	0.0277252	0.148652	0.135075	0.613625	0.0612018	0.143917	0.181256	0.603157	0.0657585	0.141669	0.189415
ath-miR162b-5p	0.905967	0	0.0433997	0.050633	0.901216	0	0.0379939	0.0607902	0.916667	0.00347222	0.0173611	0.0624999	0.904982	0.00092251	0.0405904	0.0535055	0.854701	0.00854701	0.0512821	0.0854701	0.886792	0	0.0566039	0.0566039
ath-miR163	0.514364	0.0289993	0.102791	0.353846	0.53237	0.0343164	0.10165	0.331663	0.448309	0.0157587	0.374813	0.16112	0.446001	0.0154083	0.372742	0.165849	0.630736	0.036252	0.15669	0.176322	0.649953	0.0383635	0.142948	0.168736
ath-miR164a	0.532617	0.00115119	0.351497	0.114735	0.544555	0.0027313	0.343462	0.109252	0.60991	0.0182563	0.273473	0.0983607	0.594763	0.0156635	0.305214	0.0843591	0.680292	0.0210441	0.200324	0.0983408	0.695868	0.016529	0.176308	0.111295
ath-miR164b-3p	1	0	0	0	0.928572	0	0.0714283	0	0.916667	0	0	0.0833333	0.707317	0	0.219512	0.0731707	0.787878	0	0.121213	0.0909091	0.870968	0	0.064516	0.064516
ath-miR164b-5p	0.532617	0.00115119	0.351497	0.114735	0.544555	0.0027313	0.343462	0.109252	0.60991	0.0182563	0.273473	0.0983607	0.594763	0.0156635	0.305214	0.0843591	0.680292	0.0210441	0.200324	0.0983408	0.695868	0.016529	0.176308	0.111295
ath-miR164c-3p	0.923077	0	0.076923	0	0.545454	0	0.363637	0.090909	1	0	0	0	0.9	0	0.1	0	0.4	0	0.4	0.2	0.666667	0	0.333333	0
ath-miR164c-5p	0.223684	0.00197368	0.602632	0.17171	0.185047	0.00747666	0.626791	0.180685	0.147314	0.00606586	0.636049	0.210572	0.140369	0.00555415	0.688715	0.165362	0.189977	0.0151515	0.576923	0.217949	0.225352	0.0125196	0.500782	0.261346
ath-miR165a-3p	0.604767	0.0137758	0.150577	0.23088	0.638472	0.0111387	0.106786	0.243603	0.632076	0.0218474	0.114925	0.231152	0.675384	0.015805	0.111485	0.197326	0.665339	0.0275972	0.0385516	0.268512	0.665038	0.0287601	0.0346359	0.271566
ath-miR165a-5p	0.833334	0	0	0.166666	#DIV/0!	#DIV/0!	#DIV/0!	#DIV/0!	0	1	0	0	1	0	0	0	#DIV/0!	#DIV/0!	#DIV/0!	#DIV/0!	#DIV/0!	#DIV/0!	#DIV/0!	#DIV/0!
ath-miR165b	0.604767	0.0137758	0.150577	0.23088	0.638472	0.0111387	0.106786	0.243603	0.632076	0.0218474	0.114925	0.231152	0.675384	0.015805	0.111485	0.197326	0.665339	0.0275972	0.0385516	0.268512	0.665038	0.0287601	0.0346359	0.271566
ath-miR166a-3p	0.702927	0.02139	0.0884456	0.187238	0.723979	0.0193309	0.0648858	0.191804	0.665574	0.0359004	0.142667	0.155858	0.707253	0.0248414	0.134829	0.133076	0.727715	0.048575	0.0317735	0.191936	0.727617	0.0507086	0.0300502	0.191624
ath-miR166a-5p	#DIV/0!	#DIV/0!	#DIV/0!	#DIV/0!	0.5	0	0	0.5	0	0	1	0	0.333333	0.333333	0.333333	0	#DIV/0!	#DIV/0!	#DIV/0!	#DIV/0!	1	0	0	0
ath-miR166b-3p	0.702927	0.02139	0.0884456	0.187238	0.723979	0.0193309	0.0648858	0.191804	0.665574	0.0359004	0.142667	0.155858	0.707253	0.0248414	0.134829	0.133076	0.727715	0.048575	0.0317735	0.191936	0.727617	0.0507086	0.0300502	0.191624
ath-miR166b-5p	#DIV/0!	#DIV/0!	#DIV/0!	#DIV/0!	0.5	0	0	0.5	0	0	1	0	0.333333	0.333333	0.333333	0	#DIV/0!	#DIV/0!	#DIV/0!	#DIV/0!	1	0	0	0
ath-miR166c	0.702927	0.02139	0.0884456	0.187238	0.723979	0.0193309	0.0648858	0.191804	0.665574	0.0359004	0.142667	0.155858	0.707253	0.0248414	0.134829	0.133076	0.727715	0.048575	0.0317735	0.191936	0.727617	0.0507086	0.0300502	0.191624
ath-miR166d	0.702927	0.02139	0.0884456	0.187238	0.723979	0.0193309	0.0648858	0.191804	0.665574	0.0359004	0.142667	0.155858	0.707253	0.0248414	0.134829	0.133076	0.727715	0.048575	0.0317735	0.191936	0.727617	0.0507086	0.0300502	0.191624
ath-miR166e-3p	0.702927	0.02139	0.0884456	0.187238	0.723979	0.0193309	0.0648858	0.191804	0.665574	0.0359004	0.142667	0.155858	0.707253	0.0248414	0.134829	0.133076	0.727715	0.048575	0.0317735	0.191936	0.727617	0.0507086	0.0300502	0.191624
ath-miR166e-5p	#DIV/0!	#DIV/0!	#DIV/0!	#DIV/0!	#DIV/0!	#DIV/0!	#DIV/0!	#DIV/0!	#DIV/0!	#DIV/0!	#DIV/0!	#DIV/0!	#DIV/0!	#DIV/0!	#DIV/0!	#DIV/0!	#DIV/0!	#DIV/0!	#DIV/0!	#DIV/0!	#DIV/0!	#DIV/0!	#DIV/0!	#DIV/0!
ath-miR166f	0.702927	0.02139	0.0884456	0.187238	0.723979	0.0193309	0.0648858	0.191804	0.665574	0.0359004	0.142667	0.155858	0.707253	0.0248414	0.134829	0.133076	0.727715	0.048575	0.0317735	0.191936	0.727617	0.0507086	0.0300502	0.191624
ath-miR166g	0.702927	0.02139	0.0884456	0.187238	0.723979	0.0193309	0.0648858	0.191804	0.665574	0.0359004	0.142667	0.155858	0.707253	0.0248414	0.134829	0.133076	0.727715	0.048575	0.0317735	0.191936	0.727617	0.0507086	0.0300502	0.191624
ath-miR167a-3p	#DIV/0!	#DIV/0!	#DIV/0!	#DIV/0!	#DIV/0!	#DIV/0!	#DIV/0!	#DIV/0!	1	0	0	0	0.6	0.4	0	0	1	0	0	0	1	0	0	0
ath-miR167a-5p	0.575909	0.00190115	0.337589	0.0846009	0.588677	0.000750588	0.334442	0.0761311	0.465209	0.0139081	0.448284	0.0725985	0.35154	0.0166179	0.561326	0.0705159	0.320827	0.0349519	0.539456	0.104765	0.315293	0.0336954	0.542273	0.108739
ath-miR167b	0.575909	0.00190115	0.337589	0.0846009	0.588677	0.000750588	0.334442	0.0761311	0.465209	0.0139081	0.448284	0.0725985	0.35154	0.0166179	0.561326	0.0705159	0.320827	0.0349519	0.539456	0.104765	0.315293	0.0336954	0.542273	0.108739
ath-miR167c-3p	0.880025	0	0.0103136	0.109661	0.860409	0.000300841	0.0141396	0.12515	0.666041	0	0.217636	0.116323	0.743548	0	0.154032	0.102419	0.76569	0.0041841	0.0669456	0.16318	0.792	0	0.096	0.112
ath-miR167c-5p	0.188679	0.0566038	0.188679	0.566038	0.298507	0.0597015	0.268657	0.373134	0.3875	0.0125	0.3	0.3	0.233438	0.0315458	0.394322	0.340694	0.357144	0.0446428	0.267856	0.330357	0.382978	0.0425532	0.276596	0.297873
ath-miR167d	0.0695458	0.00196299	0.745093	0.183398	0.0444659	0.00265828	0.780329	0.172547	0.0193014	0.00382902	0.848637	0.128233	0.0143709	0.00307947	0.880707	0.101842	0.025183	0.011086	0.826661	0.13707	0.0288853	0.00876707	0.819029	0.143319
ath-miR168a-3p	0.786127	0.0115607	0.138728	0.0635838	0.798122	0.0328637	0.0657278	0.103286	1	0	0	0	0.65	0	0.325	0.025	0.8	0	0.133333	0.0666667	0.785714	0	0.0714285	0.142857
ath-miR168a-5p	0.689147	0.0164317	0.160393	0.134028	0.72167	0.0159711	0.147672	0.114687	0.615246	0.0338296	0.199068	0.151857	0.63905	0.0298464	0.191525	0.139579	0.589989	0.0466182	0.189148	0.174246	0.599491	0.0534011	0.175461	0.171647
ath-miR168b-3p	0.916667	0.0833333	0	0	1	0	0	0	#DIV/0!	#DIV/0!	#DIV/0!	#DIV/0!	1	0	0	0	0.333333	0	0	0.666667	#DIV/0!	#DIV/0!	#DIV/0!	#DIV/0!
ath-miR168b-5p	0.689147	0.0164317	0.160393	0.134028	0.72167	0.0159711	0.147672	0.114687	0.615246	0.0338296	0.199068	0.151857	0.63905	0.0298464	0.191525	0.139579	0.589989	0.0466182	0.189148	0.174246	0.599491	0.0534011	0.175461	0.171647
ath-miR169a-3p	#DIV/0!	#DIV/0!	#DIV/0!	#DIV/0!	#DIV/0!	#DIV/0!	#DIV/0!	#DIV/0!	#DIV/0!	#DIV/0!	#DIV/0!	#DIV/0!	#DIV/0!	#DIV/0!	#DIV/0!	#DIV/0!	#DIV/0!	#DIV/0!	#DIV/0!	#DIV/0!	#DIV/0!	#DIV/0!	#DIV/0!	#DIV/0!
ath-miR169a-5p	0	0	0.25	0.75	0	0	0.5	0.5	0.2	0.1	0.1	0.6	0.153846	0.0769231	0.461539	0.307692	0.454545	0.0909093	0.181819	0.272727	0.222222	0.111111	0.555556	0.111111
ath-miR169b-3p	#DIV/0!	#DIV/0!	#DIV/0!	#DIV/0!	#DIV/0!	#DIV/0!	#DIV/0!	#DIV/0!	#DIV/0!	#DIV/0!	#DIV/0!	#DIV/0!	#DIV/0!	#DIV/0!	#DIV/0!	#DIV/0!	#DIV/0!	#DIV/0!	#DIV/0!	#DIV/0!	#DIV/0!	#DIV/0!	#DIV/0!	#DIV/0!
ath-miR169b-5p	0	0	0.25	0.75	0	0	0.5	0.5	0	0	0.142857	0.857143	0	0	0.545455	0.454545	0	0	0.333333	0.666667	0	0	0.833334	0.166666
ath-miR169c	0	0	0.25	0.75	0	0	0.5	0.5	0	0	0.142857	0.857143	0	0	0.545455	0.454545	0	0	0.333333	0.666667	0	0	0.833334	0.166666
ath-miR169d	#DIV/0!	#DIV/0!	#DIV/0!	#DIV/0!	0	0	0	1	#DIV/0!	#DIV/0!	#DIV/0!	#DIV/0!	#DIV/0!	#DIV/0!	#DIV/0!	#DIV/0!	0	0	1	0	#DIV/0!	#DIV/0!	#DIV/0!	#DIV/0!
ath-miR169e	#DIV/0!	#DIV/0!	#DIV/0!	#DIV/0!	0	0	0	1	#DIV/0!	#DIV/0!	#DIV/0!	#DIV/0!	#DIV/0!	#DIV/0!	#DIV/0!	#DIV/0!	0	0	1	0	#DIV/0!	#DIV/0!	#DIV/0!	#DIV/0!
ath-miR169f-3p	1	0	0	0	#DIV/0!	#DIV/0!	#DIV/0!	#DIV/0!	#DIV/0!	#DIV/0!	#DIV/0!	#DIV/0!	#DIV/0!	#DIV/0!	#DIV/0!	#DIV/0!	1	0	0	0	#DIV/0!	#DIV/0!	#DIV/0!	#DIV/0!
ath-miR169f-5p	#DIV/0!	#DIV/0!	#DIV/0!	#DIV/0!	0	0	0	1	#DIV/0!	#DIV/0!	#DIV/0!	#DIV/0!	#DIV/0!	#DIV/0!	#DIV/0!	#DIV/0!	0	0	1	0	#DIV/0!	#DIV/0!	#DIV/0!	#DIV/0!
ath-miR169g-3p	#DIV/0!	#DIV/0!	#DIV/0!	#DIV/0!	#DIV/0!	#DIV/0!	#DIV/0!	#DIV/0!	#DIV/0!	#DIV/0!	#DIV/0!	#DIV/0!	#DIV/0!	#DIV/0!	#DIV/0!	#DIV/0!	#DIV/0!	#DIV/0!	#DIV/0!	#DIV/0!	#DIV/0!	#DIV/0!	#DIV/0!	#DIV/0!
ath-miR169g-5p	#DIV/0!	#DIV/0!	#DIV/0!	#DIV/0!	0	0	0	1	#DIV/0!	#DIV/0!	#DIV/0!	#DIV/0!	#DIV/0!	#DIV/0!	#DIV/0!	#DIV/0!	0	0	1	0	#DIV/0!	#DIV/0!	#DIV/0!	#DIV/0!
ath-miR169h	0	0	0.199999	0.800001	0.0999998	0	0.4	0.5	0	0	0	1	0	0	0.375	0.625	0.272726	0	0.181818	0.545455	0	0.285714	0.285714	0.428572
ath-miR169i	0	0	0.199999	0.800001	0.0999998	0	0.4	0.5	0	0	0	1	0	0	0.375	0.625	0.272726	0	0.181818	0.545455	0	0.285714	0.285714	0.428572
ath-miR169j	0	0	0.199999	0.800001	0.0999998	0	0.4	0.5	0	0	0	1	0	0	0.375	0.625	0.272726	0	0.181818	0.545455	0	0.285714	0.285714	0.428572
ath-miR169k	0	0	0.199999	0.800001	0.0999998	0	0.4	0.5	0	0	0	1	0	0	0.375	0.625	0.272726	0	0.181818	0.545455	0	0.285714	0.285714	0.428572
ath-miR169l	0	0	0.199999	0.800001	0.0999998	0	0.4	0.5	0	0	0	1	0	0	0.375	0.625	0.272726	0	0.181818	0.545455	0	0.285714	0.285714	0.428572
ath-miR169m	0	0	0.199999	0.800001	0.0999998	0	0.4	0.5	0	0	0	1	0	0	0.375	0.625	0.272726	0	0.181818	0.545455	0	0.285714	0.285714	0.428572
ath-miR169n	0	0	0.199999	0.800001	0.0999998	0	0.4	0.5	0	0	0	1	0	0	0.375	0.625	0.272726	0	0.181818	0.545455	0	0.285714	0.285714	0.428572
ath-miR170-3p	#DIV/0!	#DIV/0!	#DIV/0!	#DIV/0!	0.666667	0	0.333333	0	0.375	0	0.375	0.25	0.44	0.0799999	0.32	0.16	0.749999	0.0250001	0.125	0.1	0.738094	0.0238096	0.166667	0.0714289
ath-miR170-5p	0.425867	0.0126183	0.438486	0.123028	0.49125	0.01125	0.42875	0.06875	0.573433	0.02058	0.333022	0.0729654	0.609709	0.0137336	0.320665	0.0558927	0.642015	0.0418008	0.23044	0.0857451	0.598214	0.0357143	0.258929	0.107143
ath-miR171a-3p	0.592593	0	0.296296	0.111111	0.552632	0	0.263158	0.18421	0.461883	0.0089686	0.439462	0.089686	0.478807	0.032967	0.395604	0.0926217	0.612244	0.0367348	0.232654	0.118367	0.666666	0.0353536	0.181818	0.116162
ath-miR171a-5p	0.425867	0.0126183	0.438486	0.123028	0.49125	0.01125	0.42875	0.06875	0.573433	0.02058	0.333022	0.0729654	0.609709	0.0137336	0.320665	0.0558927	0.642015	0.0418008	0.23044	0.0857451	0.598214	0.0357143	0.258929	0.107143
ath-miR171b-3p	0.611702	0.0372342	0.159575	0.19149	0.655503	0.0334927	0.124402	0.186603	0.319445	0.111111	0.444445	0.125	0.335106	0.0957446	0.416666	0.152482	0.276423	0.170731	0.223578	0.329268	0.30131	0.231441	0.179039	0.28821
ath-miR171b-5p	1	0	0	0	1	0	0	0	1	0	0	0	0.923077	0	0.0769231	0	#DIV/0!	#DIV/0!	#DIV/0!	#DIV/0!	#DIV/0!	#DIV/0!	#DIV/0!	#DIV/0!
ath-miR171c-3p	0.611702	0.0372342	0.159575	0.19149	0.655503	0.0334927	0.124402	0.186603	0.319445	0.111111	0.444445	0.125	0.335106	0.0957446	0.416666	0.152482	0.276423	0.170731	0.223578	0.329268	0.30131	0.231441	0.179039	0.28821
ath-miR171c-5p	1	0	0	0	1	0	0	0	0.333334	0	0.666666	0	0.333333	0	0.5	0.166667	#DIV/0!	#DIV/0!	#DIV/0!	#DIV/0!	#DIV/0!	#DIV/0!	#DIV/0!	#DIV/0!
ath-miR172a	0.470587	0.411766	0	0.117647	0.567568	0.27027	0.027027	0.135135	0.711712	0.126126	0.027027	0.135135	0.726457	0.107623	0.0627803	0.103139	0.67033	0.137363	0.0494506	0.142857	0.632911	0.132911	0.0759493	0.158228
ath-miR172b-3p	0.470587	0.411766	0	0.117647	0.567568	0.27027	0.027027	0.135135	0.711712	0.126126	0.027027	0.135135	0.726457	0.107623	0.0627803	0.103139	0.67033	0.137363	0.0494506	0.142857	0.632911	0.132911	0.0759493	0.158228
ath-miR172b-5p	#DIV/0!	#DIV/0!	#DIV/0!	#DIV/0!	#DIV/0!	#DIV/0!	#DIV/0!	#DIV/0!	#DIV/0!	#DIV/0!	#DIV/0!	#DIV/0!	#DIV/0!	#DIV/0!	#DIV/0!	#DIV/0!	#DIV/0!	#DIV/0!	#DIV/0!	#DIV/0!	#DIV/0!	#DIV/0!	#DIV/0!	#DIV/0!
ath-miR172c	0	0	0	1	0.166667	0.166667	0.166667	0.5	0.2	0	0.15	0.65	0.170732	0	0.341464	0.487804	0.0606061	0.0909088	0.272727	0.575758	0.0294118	0.0294118	0.352941	0.588235
ath-miR172d-3p	0	0	0	1	0.166667	0.166667	0.166667	0.5	0.2	0	0.15	0.65	0.170732	0	0.341464	0.487804	0.0606061	0.0909088	0.272727	0.575758	0.0294118	0.0294118	0.352941	0.588235
ath-miR172d-5p	#DIV/0!	#DIV/0!	#DIV/0!	#DIV/0!	#DIV/0!	#DIV/0!	#DIV/0!	#DIV/0!	#DIV/0!	#DIV/0!	#DIV/0!	#DIV/0!	#DIV/0!	#DIV/0!	#DIV/0!	#DIV/0!	#DIV/0!	#DIV/0!	#DIV/0!	#DIV/0!	#DIV/0!	#DIV/0!	#DIV/0!	#DIV/0!
ath-miR172e-3p	#DIV/0!	#DIV/0!	#DIV/0!	#DIV/0!	1	0	0	0	0.333333	0.333333	0.333333	0	0.75	0	0	0.25	0.75	0.125	0	0.125	0.666667	0	0.333333	0
ath-miR172e-5p	#DIV/0!	#DIV/0!	#DIV/0!	#DIV/0!	#DIV/0!	#DIV/0!	#DIV/0!	#DIV/0!	#DIV/0!	#DIV/0!	#DIV/0!	#DIV/0!	#DIV/0!	#DIV/0!	#DIV/0!	#DIV/0!	#DIV/0!	#DIV/0!	#DIV/0!	#DIV/0!	#DIV/0!	#DIV/0!	#DIV/0!	#DIV/0!
ath-miR173-3p	0.0149254	0	0.731342	0.253732	0.0243902	0	0.707317	0.268292	0.05	0	0.6	0.35	0.0327869	0	0.688524	0.278689	0	0	0.75	0.25	0.0666666	0.0666666	0.6	0.266667
ath-miR173-5p	0.635135	0.030888	0.102316	0.23166	0.711621	0.0143472	0.107604	0.166428	0.643982	0.007874	0.278403	0.0697413	0.618967	0.0070933	0.319352	0.0545875	0.611423	0.027027	0.27027	0.09128	0.616393	0.0319672	0.261475	0.090164
ath-miR1886.1	0.6	0	0.2	0.2	1	0	0	0	#DIV/0!	#DIV/0!	#DIV/0!	#DIV/0!	0.785714	0	0.214286	0	1	0	0	0	1	0	0	0
ath-miR1886.2	0.76	0	0	0.24	0.792453	0.0188679	0.113207	0.0754717	0.677419	0.0322581	0.129032	0.16129	0.651377	0.0458715	0.266055	0.0366972	0.758242	0.021978	0.131868	0.0879122	0.696428	0.0357143	0.178571	0.0892859
ath-miR1886.3	#DIV/0!	#DIV/0!	#DIV/0!	#DIV/0!	#DIV/0!	#DIV/0!	#DIV/0!	#DIV/0!	#DIV/0!	#DIV/0!	#DIV/0!	#DIV/0!	#DIV/0!	#DIV/0!	#DIV/0!	#DIV/0!	#DIV/0!	#DIV/0!	#DIV/0!	#DIV/0!	#DIV/0!	#DIV/0!	#DIV/0!	#DIV/0!
ath-miR1888a	0.241936	0.266129	0.419355	0.0725805	0.288461	0.201923	0.403846	0.105769	0.472973	0.162162	0.324324	0.0405405	0.473029	0.0788381	0.302904	0.145228	0.571429	0.155844	0.155844	0.116883	0.590164	0.131148	0.180328	0.0983607
ath-miR1888b	0	0.142857	0.857143	0	0.153846	0.076923	0.230769	0.538461	#DIV/0!	#DIV/0!	#DIV/0!	#DIV/0!	0.375	0.125	0.375	0.125	0.5	0	0.25	0.25	1	0	0	0
ath-miR2111a-3p	#DIV/0!	#DIV/0!	#DIV/0!	#DIV/0!	#DIV/0!	#DIV/0!	#DIV/0!	#DIV/0!	#DIV/0!	#DIV/0!	#DIV/0!	#DIV/0!	#DIV/0!	#DIV/0!	#DIV/0!	#DIV/0!	1	0	0	0	#DIV/0!	#DIV/0!	#DIV/0!	#DIV/0!
ath-miR2111a-5p	#DIV/0!	#DIV/0!	#DIV/0!	#DIV/0!	#DIV/0!	#DIV/0!	#DIV/0!	#DIV/0!	0	0	1	0	0	0	1	0	0	0	0.5	0.5	1	0	0	0
ath-miR2111b-3p	#DIV/0!	#DIV/0!	#DIV/0!	#DIV/0!	#DIV/0!	#DIV/0!	#DIV/0!	#DIV/0!	#DIV/0!	#DIV/0!	#DIV/0!	#DIV/0!	1	0	0	0	1	0	0	0	#DIV/0!	#DIV/0!	#DIV/0!	#DIV/0!
ath-miR2111b-5p	#DIV/0!	#DIV/0!	#DIV/0!	#DIV/0!	#DIV/0!	#DIV/0!	#DIV/0!	#DIV/0!	0	0	1	0	0	0	1	0	0	0	0.5	0.5	1	0	0	0
ath-miR2112-3p	0	0	0	1	1	0	0	0	0	0	0	1	0.333333	0	0.333333	0.333333	1	0	0	0	0.428572	0.142857	0.142857	0.285714
ath-miR2112-5p	#DIV/0!	#DIV/0!	#DIV/0!	#DIV/0!	#DIV/0!	#DIV/0!	#DIV/0!	#DIV/0!	#DIV/0!	#DIV/0!	#DIV/0!	#DIV/0!	#DIV/0!	#DIV/0!	#DIV/0!	#DIV/0!	#DIV/0!	#DIV/0!	#DIV/0!	#DIV/0!	#DIV/0!	#DIV/0!	#DIV/0!	#DIV/0!
ath-miR2933a	#DIV/0!	#DIV/0!	#DIV/0!	#DIV/0!	#DIV/0!	#DIV/0!	#DIV/0!	#DIV/0!	#DIV/0!	#DIV/0!	#DIV/0!	#DIV/0!	#DIV/0!	#DIV/0!	#DIV/0!	#DIV/0!	#DIV/0!	#DIV/0!	#DIV/0!	#DIV/0!	#DIV/0!	#DIV/0!	#DIV/0!	#DIV/0!
ath-miR2933b	#DIV/0!	#DIV/0!	#DIV/0!	#DIV/0!	#DIV/0!	#DIV/0!	#DIV/0!	#DIV/0!	#DIV/0!	#DIV/0!	#DIV/0!	#DIV/0!	#DIV/0!	#DIV/0!	#DIV/0!	#DIV/0!	#DIV/0!	#DIV/0!	#DIV/0!	#DIV/0!	#DIV/0!	#DIV/0!	#DIV/0!	#DIV/0!
ath-miR2934-3p	#DIV/0!	#DIV/0!	#DIV/0!	#DIV/0!	#DIV/0!	#DIV/0!	#DIV/0!	#DIV/0!	#DIV/0!	#DIV/0!	#DIV/0!	#DIV/0!	1	0	0	0	#DIV/0!	#DIV/0!	#DIV/0!	#DIV/0!	#DIV/0!	#DIV/0!	#DIV/0!	#DIV/0!
ath-miR2934-5p	1	0	0	0	0.5	0	0	0.5	1	0	0	0	1	0	0	0	1	0	0	0	1	0	0	0
ath-miR2936	#DIV/0!	#DIV/0!	#DIV/0!	#DIV/0!	#DIV/0!	#DIV/0!	#DIV/0!	#DIV/0!	0	1	0	0	#DIV/0!	#DIV/0!	#DIV/0!	#DIV/0!	#DIV/0!	#DIV/0!	#DIV/0!	#DIV/0!	#DIV/0!	#DIV/0!	#DIV/0!	#DIV/0!
ath-miR2939	#DIV/0!	#DIV/0!	#DIV/0!	#DIV/0!	#DIV/0!	#DIV/0!	#DIV/0!	#DIV/0!	#DIV/0!	#DIV/0!	#DIV/0!	#DIV/0!	#DIV/0!	#DIV/0!	#DIV/0!	#DIV/0!	#DIV/0!	#DIV/0!	#DIV/0!	#DIV/0!	#DIV/0!	#DIV/0!	#DIV/0!	#DIV/0!
ath-miR319a	0.257563	0.257887	0.0925414	0.392008	0.268347	0.297465	0.0532061	0.380982	0.310582	0.246792	0.191185	0.251441	0.318416	0.236376	0.179326	0.265882	0.434386	0.269311	0.0693411	0.226961	0.423665	0.264325	0.0690738	0.242936
ath-miR319b	0.257563	0.257887	0.0925414	0.392008	0.268347	0.297465	0.0532061	0.380982	0.310582	0.246792	0.191185	0.251441	0.318416	0.236376	0.179326	0.265882	0.434386	0.269311	0.0693411	0.226961	0.423665	0.264325	0.0690738	0.242936
ath-miR319c	0.0138015	0.0185606	0.00983555	0.957802	0.00654443	0.0221645	0.00507901	0.966212	0.0352859	0.0180927	0.0733707	0.873251	0.0270455	0.0163138	0.0659032	0.890738	0.0621433	0.020062	0.0301745	0.88762	0.0600474	0.0223033	0.0315248	0.886124
ath-miR3434-3p	#DIV/0!	#DIV/0!	#DIV/0!	#DIV/0!	#DIV/0!	#DIV/0!	#DIV/0!	#DIV/0!	#DIV/0!	#DIV/0!	#DIV/0!	#DIV/0!	#DIV/0!	#DIV/0!	#DIV/0!	#DIV/0!	#DIV/0!	#DIV/0!	#DIV/0!	#DIV/0!	#DIV/0!	#DIV/0!	#DIV/0!	#DIV/0!
ath-miR3434-5p	#DIV/0!	#DIV/0!	#DIV/0!	#DIV/0!	#DIV/0!	#DIV/0!	#DIV/0!	#DIV/0!	#DIV/0!	#DIV/0!	#DIV/0!	#DIV/0!	#DIV/0!	#DIV/0!	#DIV/0!	#DIV/0!	#DIV/0!	#DIV/0!	#DIV/0!	#DIV/0!	#DIV/0!	#DIV/0!	#DIV/0!	#DIV/0!
ath-miR3440b-3p	0.666667	0	0.111111	0.222222	0.903226	0	0.032258	0.0645162	0.714286	0	0.0714286	0.214286	0.809524	0.0476191	0.0714286	0.0714286	0.4	0	0.2	0.4	0.666667	0.111111	0	0.222222
ath-miR3440b-5p	#DIV/0!	#DIV/0!	#DIV/0!	#DIV/0!	1	0	0	0	0.8	0	0.2	0	0.916667	0	0.0833333	0	0.833333	0	0	0.166667	1	0	0	0
ath-miR390a-3p	0.622727	0	0.309091	0.0681819	0.630842	0	0.322429	0.0467289	0.5	0	0.4	0.1	0.578947	0	0.37594	0.0451128	0.642857	0	0.214285	0.142857	0.285714	0.142857	0.428572	0.142857
ath-miR390a-5p	0.814815	0	0.0740742	0.111111	0.714286	0	0.178571	0.107143	0.652632	0.031579	0.11579	0.2	0.739286	0.025	0.135714	0.1	0.738462	0.0153846	0.0230768	0.223077	0.75	0	0.0499999	0.2
ath-miR390b-3p	0	0	0.5	0.5	0.125	0	0.25	0.624999	0	0	0.625	0.375	0	0	0.9	0.0999999	0	0	0.666667	0.333333	0	0	1	0
ath-miR390b-5p	0.814815	0	0.0740742	0.111111	0.714286	0	0.178571	0.107143	0.652632	0.031579	0.11579	0.2	0.739286	0.025	0.135714	0.1	0.738462	0.0153846	0.0230768	0.223077	0.75	0	0.0499999	0.2
ath-miR391-3p	#DIV/0!	#DIV/0!	#DIV/0!	#DIV/0!	#DIV/0!	#DIV/0!	#DIV/0!	#DIV/0!	#DIV/0!	#DIV/0!	#DIV/0!	#DIV/0!	0	0	1	0	#DIV/0!	#DIV/0!	#DIV/0!	#DIV/0!	#DIV/0!	#DIV/0!	#DIV/0!	#DIV/0!
ath-miR391-5p	0.633333	0	0.133334	0.233334	0.623655	0	0.23656	0.139786	0.675214	0.00854701	0.25641	0.0598291	0.736017	0.0111857	0.165548	0.0872485	0.777778	0.0253968	0.104762	0.0920633	0.741804	0.0122951	0.106557	0.139344
ath-miR3932a	#DIV/0!	#DIV/0!	#DIV/0!	#DIV/0!	#DIV/0!	#DIV/0!	#DIV/0!	#DIV/0!	#DIV/0!	#DIV/0!	#DIV/0!	#DIV/0!	#DIV/0!	#DIV/0!	#DIV/0!	#DIV/0!	#DIV/0!	#DIV/0!	#DIV/0!	#DIV/0!	#DIV/0!	#DIV/0!	#DIV/0!	#DIV/0!
ath-miR3932b-3p	#DIV/0!	#DIV/0!	#DIV/0!	#DIV/0!	#DIV/0!	#DIV/0!	#DIV/0!	#DIV/0!	#DIV/0!	#DIV/0!	#DIV/0!	#DIV/0!	#DIV/0!	#DIV/0!	#DIV/0!	#DIV/0!	#DIV/0!	#DIV/0!	#DIV/0!	#DIV/0!	#DIV/0!	#DIV/0!	#DIV/0!	#DIV/0!
ath-miR3932b-5p	0.880374	0.00252336	0.0127103	0.104392	0.866008	0.00304096	0.0133992	0.117552	0.831387	0.00140122	0.0490426	0.118169	0.867326	0.00192654	0.0423837	0.0883639	0.80258	0.00892856	0.0277778	0.160714	0.784219	0.00644123	0.0161031	0.193237
ath-miR3933	#DIV/0!	#DIV/0!	#DIV/0!	#DIV/0!	#DIV/0!	#DIV/0!	#DIV/0!	#DIV/0!	#DIV/0!	#DIV/0!	#DIV/0!	#DIV/0!	#DIV/0!	#DIV/0!	#DIV/0!	#DIV/0!	#DIV/0!	#DIV/0!	#DIV/0!	#DIV/0!	#DIV/0!	#DIV/0!	#DIV/0!	#DIV/0!
ath-miR393a-3p	1	0	0	0	0.857143	0	0	0.142857	1	0	0	0	0.666667	0	0.166667	0.166667	1	0	0	0	1	0	0	0
ath-miR393a-5p	0.109215	0	0.709898	0.180887	0.0826772	0	0.700787	0.216535	0.102041	0.0102041	0.683674	0.204081	0.0925926	0.0111111	0.688889	0.207408	0.0264318	0.0176212	0.788547	0.167401	0.0287357	0.0229885	0.74138	0.206896
ath-miR393b-3p	0.845494	0.0128755	0.0643777	0.0772533	0.861004	0.0386099	0.0347489	0.0656371	0.766234	0.0324675	0.0454545	0.155844	0.849162	0.0307263	0.0558659	0.0642458	0.75188	0.0225563	0.075188	0.150376	0.777778	0.0370371	0.0123457	0.172839
ath-miR393b-5p	0.109215	0	0.709898	0.180887	0.0826772	0	0.700787	0.216535	0.102041	0.0102041	0.683674	0.204081	0.0925926	0.0111111	0.688889	0.207408	0.0264318	0.0176212	0.788547	0.167401	0.0287357	0.0229885	0.74138	0.206896
ath-miR394a	0.748917	0.0259741	0.0259741	0.199134	0.759313	0.0200573	0.0171919	0.203438	0.813569	0.0114025	0.013683	0.161346	0.842183	0.0135939	0.0146559	0.129567	0.775293	0.0172288	0.0106305	0.196847	0.779525	0.0210889	0.00958588	0.1898
ath-miR394b-3p	#DIV/0!	#DIV/0!	#DIV/0!	#DIV/0!	#DIV/0!	#DIV/0!	#DIV/0!	#DIV/0!	#DIV/0!	#DIV/0!	#DIV/0!	#DIV/0!	#DIV/0!	#DIV/0!	#DIV/0!	#DIV/0!	#DIV/0!	#DIV/0!	#DIV/0!	#DIV/0!	#DIV/0!	#DIV/0!	#DIV/0!	#DIV/0!
ath-miR394b-5p	0.748917	0.0259741	0.0259741	0.199134	0.759313	0.0200573	0.0171919	0.203438	0.813569	0.0114025	0.013683	0.161346	0.842183	0.0135939	0.0146559	0.129567	0.775293	0.0172288	0.0106305	0.196847	0.779525	0.0210889	0.00958588	0.1898
ath-miR395a	0.899453	0.000781861	0.0140734	0.0856916	0.881686	0.000720332	0.0234108	0.0941833	0.860117	0.00373732	0.0315003	0.104645	0.897227	0.00640787	0.0264941	0.0698708	0.858866	0.0168879	0.0361881	0.088058	0.832747	0.0176056	0.040493	0.109155
ath-miR395b	0.900601	0.00804171	0.00717234	0.0841845	0.88693	0.00870344	0.0102656	0.094101	0.830557	0.0142789	0.0252261	0.129938	0.874096	0.013507	0.0238784	0.088519	0.743456	0.0287957	0.0602093	0.167539	0.794118	0.00420167	0.0378151	0.163865
ath-miR395c	0.900601	0.00804171	0.00717234	0.0841845	0.88693	0.00870344	0.0102656	0.094101	0.830557	0.0142789	0.0252261	0.129938	0.874096	0.013507	0.0238784	0.088519	0.743456	0.0287957	0.0602093	0.167539	0.794118	0.00420167	0.0378151	0.163865
ath-miR395d	0.899453	0.000781861	0.0140734	0.0856916	0.881686	0.000720332	0.0234108	0.0941833	0.860117	0.00373732	0.0315003	0.104645	0.897227	0.00640787	0.0264941	0.0698708	0.858866	0.0168879	0.0361881	0.088058	0.832747	0.0176056	0.040493	0.109155
ath-miR395e	0.899453	0.000781861	0.0140734	0.0856916	0.881686	0.000720332	0.0234108	0.0941833	0.860117	0.00373732	0.0315003	0.104645	0.897227	0.00640787	0.0264941	0.0698708	0.858866	0.0168879	0.0361881	0.088058	0.832747	0.0176056	0.040493	0.109155
ath-miR395f	0.900601	0.00804171	0.00717234	0.0841845	0.88693	0.00870344	0.0102656	0.094101	0.830557	0.0142789	0.0252261	0.129938	0.874096	0.013507	0.0238784	0.088519	0.743456	0.0287957	0.0602093	0.167539	0.794118	0.00420167	0.0378151	0.163865
ath-miR396a-3p	0.788177	0.00113679	0.169383	0.0413035	0.750783	0.00125235	0.212899	0.0350659	0.605568	0.0278422	0.278422	0.0881671	0.600208	0.0167015	0.32046	0.0626306	0.603174	0.0222222	0.288889	0.0857145	0.628788	0	0.257575	0.113636
ath-miR396a-5p	0.0592278	0.000912851	0.656501	0.283359	0.0311392	0.00126525	0.649633	0.317963	0.0704982	0.00487685	0.578863	0.345761	0.0589079	0.0039458	0.627162	0.309984	0.110179	0.0109449	0.468868	0.410009	0.126253	0.0104216	0.454893	0.408432
ath-miR396b-3p	0.759109	0.00809719	0.180162	0.0526316	0.763974	0.00621118	0.173914	0.0559007	0.681034	0.0215517	0.224138	0.0732758	0.684825	0.0116731	0.233463	0.070039	0.686696	0.0300429	0.197424	0.085837	0.669231	0.0538462	0.2	0.076923
ath-miR396b-5p	0.68311	0.00483913	0.19787	0.11418	0.70131	0.00453828	0.177723	0.116428	0.730591	0.0084901	0.153394	0.107525	0.746546	0.00780482	0.153997	0.0916515	0.703267	0.0180197	0.132207	0.146506	0.685484	0.0182881	0.139801	0.156427
ath-miR397a	0.104167	0	0.125	0.770833	0	0	0.173913	0.826087	0.0142857	0	0.585714	0.4	0.0433214	0.00722022	0.476534	0.472924	0.122807	0.0350877	0.236843	0.605263	0.173469	0.0306123	0.234694	0.561224
ath-miR397b	0.583334	0	0	0.416666	0.565217	0	0.0869565	0.347826	0.407407	0.037037	0.259259	0.296296	0.474999	0.0875002	0.275	0.1625	0.486726	0.097345	0.283186	0.132743	0.438775	0.112245	0.244898	0.204081
ath-miR398a-3p	0.0764092	0.000626304	0.0690328	0.853932	0.0702209	0.000449894	0.0469388	0.88239	0.102142	0.000382556	0.103928	0.793548	0.0862361	0.000492153	0.128944	0.784328	0.0880504	0.00228702	0.104202	0.80546	0.0951248	0.00252675	0.0789239	0.823424
ath-miR398a-5p	#DIV/0!	#DIV/0!	#DIV/0!	#DIV/0!	#DIV/0!	#DIV/0!	#DIV/0!	#DIV/0!	#DIV/0!	#DIV/0!	#DIV/0!	#DIV/0!	#DIV/0!	#DIV/0!	#DIV/0!	#DIV/0!	#DIV/0!	#DIV/0!	#DIV/0!	#DIV/0!	#DIV/0!	#DIV/0!	#DIV/0!	#DIV/0!
ath-miR398b-3p	0.93012	0.000194506	0.00521489	0.0644711	0.929352	0.000148007	0.00356355	0.0669362	0.906442	0.000803699	0.010738	0.0820167	0.927022	0.000468724	0.0102338	0.0622751	0.896449	0.00145347	0.0117731	0.0903249	0.889137	0.00178694	0.0095845	0.0994911
ath-miR398b-5p	#DIV/0!	#DIV/0!	#DIV/0!	#DIV/0!	#DIV/0!	#DIV/0!	#DIV/0!	#DIV/0!	1	0	0	0	1	0	0	0	1	0	0	0	#DIV/0!	#DIV/0!	#DIV/0!	#DIV/0!
ath-miR398c-3p	0.93012	0.000194506	0.00521489	0.0644711	0.929352	0.000148007	0.00356355	0.0669362	0.906442	0.000803699	0.010738	0.0820167	0.927022	0.000468724	0.0102338	0.0622751	0.896449	0.00145347	0.0117731	0.0903249	0.889137	0.00178694	0.0095845	0.0994911
ath-miR398c-5p	#DIV/0!	#DIV/0!	#DIV/0!	#DIV/0!	#DIV/0!	#DIV/0!	#DIV/0!	#DIV/0!	1	0	0	0	1	0	0	0	1	0	0	0	#DIV/0!	#DIV/0!	#DIV/0!	#DIV/0!
ath-miR399a	1	0	0	0	0.333333	0	0.333333	0.333333	0.8	0.2	0	0	0.84	0	0.0400001	0.12	0.555555	0.111111	0.111111	0.222223	0.571429	0	0.142857	0.285714
ath-miR399b	0.938967	0	0.00469483	0.056338	0.882488	0.0046083	0.0092166	0.103687	0.856061	0.0113636	0.0113636	0.121212	0.883333	0.00694445	0.0222223	0.0874999	0.777397	0.0171233	0.0342466	0.171233	0.792683	0.00609756	0.0609756	0.140244
ath-miR399c-3p	0.938967	0	0.00469483	0.056338	0.882488	0.0046083	0.0092166	0.103687	0.856061	0.0113636	0.0113636	0.121212	0.883333	0.00694445	0.0222223	0.0874999	0.777397	0.0171233	0.0342466	0.171233	0.792683	0.00609756	0.0609756	0.140244
ath-miR399c-5p	#DIV/0!	#DIV/0!	#DIV/0!	#DIV/0!	#DIV/0!	#DIV/0!	#DIV/0!	#DIV/0!	#DIV/0!	#DIV/0!	#DIV/0!	#DIV/0!	#DIV/0!	#DIV/0!	#DIV/0!	#DIV/0!	#DIV/0!	#DIV/0!	#DIV/0!	#DIV/0!	#DIV/0!	#DIV/0!	#DIV/0!	#DIV/0!
ath-miR399d	1	0	0	0	0	0	0.5	0.5	#DIV/0!	#DIV/0!	#DIV/0!	#DIV/0!	0.571429	0.0714286	0.142857	0.214286	0.428571	0	0.142858	0.428571	0.538461	0.153846	0.076923	0.23077
ath-miR399e	0	0	1	0	0	0	0	1	#DIV/0!	#DIV/0!	#DIV/0!	#DIV/0!	0	0	0.5	0.5	0	0.5	0	0.5	0	0	0	1
ath-miR399f	#DIV/0!	#DIV/0!	#DIV/0!	#DIV/0!	0	0	0.5	0.5	1	0	0	0	0.571429	0	0.285714	0.142857	0.6	0.1	0.1	0.2	0.714286	0	0.142857	0.142857
ath-miR400	0	0	0	1	0.428571	0	0	0.571429	0	0	1	0	0.55	0.0999999	0.25	0.0999999	0.375	0.0625001	0.375	0.187499	0.428571	0.142857	0.214286	0.214286
ath-miR402	0.0326087	0	0.0760871	0.891304	0.00813007	0	0.0731706	0.918699	0.0227273	0	0.272727	0.704545	0.0285714	0	0.171429	0.8	0.0555557	0	0.0277778	0.916667	0	0	0.0454545	0.954545
ath-miR403-3p	0.502975	0.034242	0.0771548	0.385628	0.462562	0.028216	0.101335	0.407887	0.453368	0.0497755	0.167543	0.329314	0.494158	0.0405285	0.182061	0.283253	0.422712	0.0565608	0.128755	0.391972	0.402625	0.0533868	0.113447	0.430542
ath-miR403-5p	0.713376	0.0796178	0.124204	0.0828026	0.710811	0.0918918	0.121622	0.0756756	0.719072	0.0103093	0.221649	0.048969	0.716266	0.0203327	0.220888	0.042514	0.792856	0.0285715	0.114286	0.0642861	0.857723	0.0121952	0.0650408	0.0650408
ath-miR404	#DIV/0!	#DIV/0!	#DIV/0!	#DIV/0!	#DIV/0!	#DIV/0!	#DIV/0!	#DIV/0!	0	0	0	1	0	0	0	1	0	0	0	1	0	0	0	1
ath-miR406	#DIV/0!	#DIV/0!	#DIV/0!	#DIV/0!	#DIV/0!	#DIV/0!	#DIV/0!	#DIV/0!	0	0	0	1	#DIV/0!	#DIV/0!	#DIV/0!	#DIV/0!	0	0	0	1	#DIV/0!	#DIV/0!	#DIV/0!	#DIV/0!
ath-miR408-3p	0.877665	4.7688e-05	0.0126691	0.109619	0.861005	3.29449e-05	0.0134854	0.125476	0.831768	0.00240529	0.0287247	0.137102	0.862738	0.00127528	0.0318982	0.104089	0.811536	0.00615358	0.0263593	0.155952	0.803995	0.00682989	0.0246133	0.164562
ath-miR408-5p	0.824238	0.0155926	0.0992795	0.0608901	0.84537	0.0168365	0.0796044	0.0581895	0.799688	0.0167903	0.103866	0.0796564	0.802659	0.0137764	0.12	0.0635648	0.797786	0.0227273	0.0833332	0.0961538	0.769294	0.0307054	0.0929462	0.107054
ath-miR419	#DIV/0!	#DIV/0!	#DIV/0!	#DIV/0!	#DIV/0!	#DIV/0!	#DIV/0!	#DIV/0!	#DIV/0!	#DIV/0!	#DIV/0!	#DIV/0!	#DIV/0!	#DIV/0!	#DIV/0!	#DIV/0!	0	0	0	1	#DIV/0!	#DIV/0!	#DIV/0!	#DIV/0!
ath-miR4221	#DIV/0!	#DIV/0!	#DIV/0!	#DIV/0!	0.4	0	0.2	0.4	0.5	0	0.25	0.25	0.666667	0	0.333333	0	0.5	0	0.5	0	#DIV/0!	#DIV/0!	#DIV/0!	#DIV/0!
ath-miR4227	#DIV/0!	#DIV/0!	#DIV/0!	#DIV/0!	#DIV/0!	#DIV/0!	#DIV/0!	#DIV/0!	0	0	0	1	#DIV/0!	#DIV/0!	#DIV/0!	#DIV/0!	#DIV/0!	#DIV/0!	#DIV/0!	#DIV/0!	0	0	0	1
ath-miR4228-3p	0.529411	0	0.352942	0.117647	0.391304	0	0.391304	0.217392	0	0	1	0	0.538462	0	0.230769	0.230769	0.5	0	0.25	0.25	1	0	0	0
ath-miR4228-5p	#DIV/0!	#DIV/0!	#DIV/0!	#DIV/0!	#DIV/0!	#DIV/0!	#DIV/0!	#DIV/0!	0	0	0	1	#DIV/0!	#DIV/0!	#DIV/0!	#DIV/0!	#DIV/0!	#DIV/0!	#DIV/0!	#DIV/0!	#DIV/0!	#DIV/0!	#DIV/0!	#DIV/0!
ath-miR4239	#DIV/0!	#DIV/0!	#DIV/0!	#DIV/0!	#DIV/0!	#DIV/0!	#DIV/0!	#DIV/0!	#DIV/0!	#DIV/0!	#DIV/0!	#DIV/0!	#DIV/0!	#DIV/0!	#DIV/0!	#DIV/0!	#DIV/0!	#DIV/0!	#DIV/0!	#DIV/0!	#DIV/0!	#DIV/0!	#DIV/0!	#DIV/0!
ath-miR4243	#DIV/0!	#DIV/0!	#DIV/0!	#DIV/0!	#DIV/0!	#DIV/0!	#DIV/0!	#DIV/0!	#DIV/0!	#DIV/0!	#DIV/0!	#DIV/0!	0	1	0	0	0	0	0	1	#DIV/0!	#DIV/0!	#DIV/0!	#DIV/0!
ath-miR4245	#DIV/0!	#DIV/0!	#DIV/0!	#DIV/0!	#DIV/0!	#DIV/0!	#DIV/0!	#DIV/0!	1	0	0	0	#DIV/0!	#DIV/0!	#DIV/0!	#DIV/0!	#DIV/0!	#DIV/0!	#DIV/0!	#DIV/0!	#DIV/0!	#DIV/0!	#DIV/0!	#DIV/0!
ath-miR447a-3p	0.623391	0.027897	0.167382	0.181331	0.584246	0.019863	0.193836	0.202055	0.346473	0.033195	0.358921	0.261411	0.398522	0.0255828	0.392268	0.183626	0.415585	0.0584415	0.253247	0.272727	0.373913	0.0347826	0.26087	0.330434
ath-miR447a.2-3p	0.491379	0.241379	0.17931	0.0879311	0.613894	0.174475	0.145396	0.0662357	0.714286	0.0238095	0.183674	0.0782314	0.703839	0.0292506	0.191042	0.0758684	0.74028	0.0902021	0.0824262	0.0870919	0.756708	0.0948121	0.0608228	0.0876567
ath-miR447b	0.623391	0.027897	0.167382	0.181331	0.584246	0.019863	0.193836	0.202055	0.346473	0.033195	0.358921	0.261411	0.398522	0.0255828	0.392268	0.183626	0.415585	0.0584415	0.253247	0.272727	0.373913	0.0347826	0.26087	0.330434
ath-miR447c-3p	#DIV/0!	#DIV/0!	#DIV/0!	#DIV/0!	#DIV/0!	#DIV/0!	#DIV/0!	#DIV/0!	#DIV/0!	#DIV/0!	#DIV/0!	#DIV/0!	0	0	0	1	#DIV/0!	#DIV/0!	#DIV/0!	#DIV/0!	#DIV/0!	#DIV/0!	#DIV/0!	#DIV/0!
ath-miR447c-5p	#DIV/0!	#DIV/0!	#DIV/0!	#DIV/0!	#DIV/0!	#DIV/0!	#DIV/0!	#DIV/0!	#DIV/0!	#DIV/0!	#DIV/0!	#DIV/0!	#DIV/0!	#DIV/0!	#DIV/0!	#DIV/0!	#DIV/0!	#DIV/0!	#DIV/0!	#DIV/0!	#DIV/0!	#DIV/0!	#DIV/0!	#DIV/0!
ath-miR472-3p	0.721244	0.0383419	0.118135	0.12228	0.77027	0.0259876	0.0852392	0.118503	0.729604	0.032634	0.118881	0.118881	0.759347	0.0226434	0.113217	0.104792	0.706754	0.0428335	0.0807249	0.169687	0.717557	0.033079	0.104326	0.145038
ath-miR472-5p	0.5	0	0.5	0	#DIV/0!	#DIV/0!	#DIV/0!	#DIV/0!	1	0	0	0	0.5	0	0.5	0	#DIV/0!	#DIV/0!	#DIV/0!	#DIV/0!	0	0	0	1
ath-miR5012	0.391305	0.108696	0.097826	0.402174	0.350319	0.0764334	0.197452	0.375795	0.349776	0.00448431	0.569506	0.0762332	0.327704	0	0.545607	0.12669	0.689075	0.0168067	0.109244	0.184874	0.574074	0.0277778	0.157407	0.240741
ath-miR5013	1	0	0	0	#DIV/0!	#DIV/0!	#DIV/0!	#DIV/0!	#DIV/0!	#DIV/0!	#DIV/0!	#DIV/0!	1	0	0	0	#DIV/0!	#DIV/0!	#DIV/0!	#DIV/0!	#DIV/0!	#DIV/0!	#DIV/0!	#DIV/0!
ath-miR5014a-3p	#DIV/0!	#DIV/0!	#DIV/0!	#DIV/0!	0	0	1	0	#DIV/0!	#DIV/0!	#DIV/0!	#DIV/0!	#DIV/0!	#DIV/0!	#DIV/0!	#DIV/0!	#DIV/0!	#DIV/0!	#DIV/0!	#DIV/0!	#DIV/0!	#DIV/0!	#DIV/0!	#DIV/0!
ath-miR5014a-5p	#DIV/0!	#DIV/0!	#DIV/0!	#DIV/0!	#DIV/0!	#DIV/0!	#DIV/0!	#DIV/0!	#DIV/0!	#DIV/0!	#DIV/0!	#DIV/0!	#DIV/0!	#DIV/0!	#DIV/0!	#DIV/0!	#DIV/0!	#DIV/0!	#DIV/0!	#DIV/0!	#DIV/0!	#DIV/0!	#DIV/0!	#DIV/0!
ath-miR5014b	#DIV/0!	#DIV/0!	#DIV/0!	#DIV/0!	#DIV/0!	#DIV/0!	#DIV/0!	#DIV/0!	#DIV/0!	#DIV/0!	#DIV/0!	#DIV/0!	#DIV/0!	#DIV/0!	#DIV/0!	#DIV/0!	#DIV/0!	#DIV/0!	#DIV/0!	#DIV/0!	#DIV/0!	#DIV/0!	#DIV/0!	#DIV/0!
ath-miR5019	#DIV/0!	#DIV/0!	#DIV/0!	#DIV/0!	#DIV/0!	#DIV/0!	#DIV/0!	#DIV/0!	#DIV/0!	#DIV/0!	#DIV/0!	#DIV/0!	1	0	0	0	#DIV/0!	#DIV/0!	#DIV/0!	#DIV/0!	#DIV/0!	#DIV/0!	#DIV/0!	#DIV/0!
ath-miR5020a	0.5	0	0.5	0	#DIV/0!	#DIV/0!	#DIV/0!	#DIV/0!	#DIV/0!	#DIV/0!	#DIV/0!	#DIV/0!	#DIV/0!	#DIV/0!	#DIV/0!	#DIV/0!	#DIV/0!	#DIV/0!	#DIV/0!	#DIV/0!	#DIV/0!	#DIV/0!	#DIV/0!	#DIV/0!
ath-miR5020b	#DIV/0!	#DIV/0!	#DIV/0!	#DIV/0!	#DIV/0!	#DIV/0!	#DIV/0!	#DIV/0!	#DIV/0!	#DIV/0!	#DIV/0!	#DIV/0!	#DIV/0!	#DIV/0!	#DIV/0!	#DIV/0!	#DIV/0!	#DIV/0!	#DIV/0!	#DIV/0!	#DIV/0!	#DIV/0!	#DIV/0!	#DIV/0!
ath-miR5020c	0	0	1	0	0	0	0	1	#DIV/0!	#DIV/0!	#DIV/0!	#DIV/0!	#DIV/0!	#DIV/0!	#DIV/0!	#DIV/0!	#DIV/0!	#DIV/0!	#DIV/0!	#DIV/0!	#DIV/0!	#DIV/0!	#DIV/0!	#DIV/0!
ath-miR5023	#DIV/0!	#DIV/0!	#DIV/0!	#DIV/0!	#DIV/0!	#DIV/0!	#DIV/0!	#DIV/0!	#DIV/0!	#DIV/0!	#DIV/0!	#DIV/0!	0	0	1	0	#DIV/0!	#DIV/0!	#DIV/0!	#DIV/0!	#DIV/0!	#DIV/0!	#DIV/0!	#DIV/0!
ath-miR5024-3p	0.790849	0	0.0915033	0.117647	0.799107	0.00446427	0.0758929	0.120536	0.692308	0.025641	0.102564	0.179487	0.8	0.00740741	0.0740741	0.118519	1	0	0	0	0.714286	0	0.142857	0.142857
ath-miR5024-5p	#DIV/0!	#DIV/0!	#DIV/0!	#DIV/0!	#DIV/0!	#DIV/0!	#DIV/0!	#DIV/0!	#DIV/0!	#DIV/0!	#DIV/0!	#DIV/0!	#DIV/0!	#DIV/0!	#DIV/0!	#DIV/0!	#DIV/0!	#DIV/0!	#DIV/0!	#DIV/0!	#DIV/0!	#DIV/0!	#DIV/0!	#DIV/0!
ath-miR5026	0.84143	0	0.0100825	0.148488	0.882052	0.00128205	0.00576921	0.110897	0.84	0.008	0.0032	0.1488	0.853561	0.00455841	0.00854701	0.133333	0.774621	0.00757575	0.0227273	0.195076	0.764286	0.0119048	0.0214286	0.202381
ath-miR5027	#DIV/0!	#DIV/0!	#DIV/0!	#DIV/0!	0	0	0	1	#DIV/0!	#DIV/0!	#DIV/0!	#DIV/0!	#DIV/0!	#DIV/0!	#DIV/0!	#DIV/0!	1	0	0	0	#DIV/0!	#DIV/0!	#DIV/0!	#DIV/0!
ath-miR5028	0	0	0.5	0.5	0.428572	0.285715	0.142857	0.142857	0.428572	0.285714	0.285714	0	0.416667	0	0.416667	0.166666	0.250001	0	0.749999	0	0.600001	0.2	0.2	0
ath-miR5029	#DIV/0!	#DIV/0!	#DIV/0!	#DIV/0!	#DIV/0!	#DIV/0!	#DIV/0!	#DIV/0!	#DIV/0!	#DIV/0!	#DIV/0!	#DIV/0!	#DIV/0!	#DIV/0!	#DIV/0!	#DIV/0!	#DIV/0!	#DIV/0!	#DIV/0!	#DIV/0!	#DIV/0!	#DIV/0!	#DIV/0!	#DIV/0!
ath-miR5595a	1	0	0	0	1	0	0	0	1	0	0	0	0.666666	0	0	0.333334	#DIV/0!	#DIV/0!	#DIV/0!	#DIV/0!	1	0	0	0
ath-miR5629	0.416667	0	0.333334	0.25	0	0	1	0	0	0	0.5	0.5	0.333333	0	0.333333	0.333333	0.2	0.4	0	0.4	0	0	0	1
ath-miR5631	#DIV/0!	#DIV/0!	#DIV/0!	#DIV/0!	#DIV/0!	#DIV/0!	#DIV/0!	#DIV/0!	0	0	0	1	0	0	1	0	#DIV/0!	#DIV/0!	#DIV/0!	#DIV/0!	#DIV/0!	#DIV/0!	#DIV/0!	#DIV/0!
ath-miR5632-3p	1	0	0	0	0	0	1	0	#DIV/0!	#DIV/0!	#DIV/0!	#DIV/0!	1	0	0	0	#DIV/0!	#DIV/0!	#DIV/0!	#DIV/0!	#DIV/0!	#DIV/0!	#DIV/0!	#DIV/0!
ath-miR5632-5p	1	0	0	0	#DIV/0!	#DIV/0!	#DIV/0!	#DIV/0!	#DIV/0!	#DIV/0!	#DIV/0!	#DIV/0!	0.8	0.2	0	0	1	0	0	0	0	0	0	1
ath-miR5633	#DIV/0!	#DIV/0!	#DIV/0!	#DIV/0!	#DIV/0!	#DIV/0!	#DIV/0!	#DIV/0!	#DIV/0!	#DIV/0!	#DIV/0!	#DIV/0!	#DIV/0!	#DIV/0!	#DIV/0!	#DIV/0!	1	0	0	0	#DIV/0!	#DIV/0!	#DIV/0!	#DIV/0!
ath-miR5634	#DIV/0!	#DIV/0!	#DIV/0!	#DIV/0!	#DIV/0!	#DIV/0!	#DIV/0!	#DIV/0!	#DIV/0!	#DIV/0!	#DIV/0!	#DIV/0!	#DIV/0!	#DIV/0!	#DIV/0!	#DIV/0!	#DIV/0!	#DIV/0!	#DIV/0!	#DIV/0!	#DIV/0!	#DIV/0!	#DIV/0!	#DIV/0!
ath-miR5635a	#DIV/0!	#DIV/0!	#DIV/0!	#DIV/0!	#DIV/0!	#DIV/0!	#DIV/0!	#DIV/0!	#DIV/0!	#DIV/0!	#DIV/0!	#DIV/0!	#DIV/0!	#DIV/0!	#DIV/0!	#DIV/0!	#DIV/0!	#DIV/0!	#DIV/0!	#DIV/0!	#DIV/0!	#DIV/0!	#DIV/0!	#DIV/0!
ath-miR5635b	#DIV/0!	#DIV/0!	#DIV/0!	#DIV/0!	#DIV/0!	#DIV/0!	#DIV/0!	#DIV/0!	#DIV/0!	#DIV/0!	#DIV/0!	#DIV/0!	#DIV/0!	#DIV/0!	#DIV/0!	#DIV/0!	#DIV/0!	#DIV/0!	#DIV/0!	#DIV/0!	#DIV/0!	#DIV/0!	#DIV/0!	#DIV/0!
ath-miR5635c	#DIV/0!	#DIV/0!	#DIV/0!	#DIV/0!	#DIV/0!	#DIV/0!	#DIV/0!	#DIV/0!	#DIV/0!	#DIV/0!	#DIV/0!	#DIV/0!	#DIV/0!	#DIV/0!	#DIV/0!	#DIV/0!	#DIV/0!	#DIV/0!	#DIV/0!	#DIV/0!	#DIV/0!	#DIV/0!	#DIV/0!	#DIV/0!
ath-miR5635d	#DIV/0!	#DIV/0!	#DIV/0!	#DIV/0!	#DIV/0!	#DIV/0!	#DIV/0!	#DIV/0!	#DIV/0!	#DIV/0!	#DIV/0!	#DIV/0!	#DIV/0!	#DIV/0!	#DIV/0!	#DIV/0!	#DIV/0!	#DIV/0!	#DIV/0!	#DIV/0!	#DIV/0!	#DIV/0!	#DIV/0!	#DIV/0!
ath-miR5636	#DIV/0!	#DIV/0!	#DIV/0!	#DIV/0!	#DIV/0!	#DIV/0!	#DIV/0!	#DIV/0!	#DIV/0!	#DIV/0!	#DIV/0!	#DIV/0!	#DIV/0!	#DIV/0!	#DIV/0!	#DIV/0!	#DIV/0!	#DIV/0!	#DIV/0!	#DIV/0!	#DIV/0!	#DIV/0!	#DIV/0!	#DIV/0!
ath-miR5637	1	0	0	0	0.625	0	0.25	0.125	0.818182	0	0.181818	0	0.757576	0	0.242424	0	0.9	0	0	0.1	1	0	0	0
ath-miR5638a	1	0	0	0	#DIV/0!	#DIV/0!	#DIV/0!	#DIV/0!	#DIV/0!	#DIV/0!	#DIV/0!	#DIV/0!	#DIV/0!	#DIV/0!	#DIV/0!	#DIV/0!	1	0	0	0	#DIV/0!	#DIV/0!	#DIV/0!	#DIV/0!
ath-miR5638b	#DIV/0!	#DIV/0!	#DIV/0!	#DIV/0!	#DIV/0!	#DIV/0!	#DIV/0!	#DIV/0!	0.5	0	0	0.5	0.714286	0	0.142857	0.142857	0	1	0	0	#DIV/0!	#DIV/0!	#DIV/0!	#DIV/0!
ath-miR5639-3p	#DIV/0!	#DIV/0!	#DIV/0!	#DIV/0!	#DIV/0!	#DIV/0!	#DIV/0!	#DIV/0!	#DIV/0!	#DIV/0!	#DIV/0!	#DIV/0!	#DIV/0!	#DIV/0!	#DIV/0!	#DIV/0!	#DIV/0!	#DIV/0!	#DIV/0!	#DIV/0!	#DIV/0!	#DIV/0!	#DIV/0!	#DIV/0!
ath-miR5639-5p	#DIV/0!	#DIV/0!	#DIV/0!	#DIV/0!	1	0	0	0	1	0	0	0	0.5	0	0	0.5	1	0	0	0	1	0	0	0
ath-miR5640	0.0967742	0	0.645162	0.258064	0.0652173	0	0.5	0.434783	0	0	0.833333	0.166667	0.14	0	0.58	0.28	0.599999	0	0.400001	0	0.333333	0	0.666667	0
ath-miR5641	1	0	0	0	0.5	0	0.5	0	#DIV/0!	#DIV/0!	#DIV/0!	#DIV/0!	0.333334	0	0	0.666666	#DIV/0!	#DIV/0!	#DIV/0!	#DIV/0!	0	0	1	0
ath-miR5642a	0.0487807	0.0365854	0.0121951	0.902439	0.0591715	0.00591715	0.0650886	0.869823	0.00754006	0.0141376	0.0754006	0.902922	0.0136129	0.0125238	0.0462837	0.92758	0.0360112	0.0415513	0.0526317	0.869806	0.0299625	0.0337079	0.0374531	0.898877
ath-miR5642b	0.0487807	0.0365854	0.0121951	0.902439	0.0591715	0.00591715	0.0650886	0.869823	0.00754006	0.0141376	0.0754006	0.902922	0.0136129	0.0125238	0.0462837	0.92758	0.0360112	0.0415513	0.0526317	0.869806	0.0299625	0.0337079	0.0374531	0.898877
ath-miR5643a	#DIV/0!	#DIV/0!	#DIV/0!	#DIV/0!	1	0	0	0	1	0	0	0	0.75	0	0	0.25	#DIV/0!	#DIV/0!	#DIV/0!	#DIV/0!	#DIV/0!	#DIV/0!	#DIV/0!	#DIV/0!
ath-miR5643b	#DIV/0!	#DIV/0!	#DIV/0!	#DIV/0!	1	0	0	0	1	0	0	0	0.75	0	0	0.25	#DIV/0!	#DIV/0!	#DIV/0!	#DIV/0!	#DIV/0!	#DIV/0!	#DIV/0!	#DIV/0!
ath-miR5644	#DIV/0!	#DIV/0!	#DIV/0!	#DIV/0!	1	0	0	0	#DIV/0!	#DIV/0!	#DIV/0!	#DIV/0!	#DIV/0!	#DIV/0!	#DIV/0!	#DIV/0!	#DIV/0!	#DIV/0!	#DIV/0!	#DIV/0!	#DIV/0!	#DIV/0!	#DIV/0!	#DIV/0!
ath-miR5645a	#DIV/0!	#DIV/0!	#DIV/0!	#DIV/0!	#DIV/0!	#DIV/0!	#DIV/0!	#DIV/0!	#DIV/0!	#DIV/0!	#DIV/0!	#DIV/0!	#DIV/0!	#DIV/0!	#DIV/0!	#DIV/0!	#DIV/0!	#DIV/0!	#DIV/0!	#DIV/0!	#DIV/0!	#DIV/0!	#DIV/0!	#DIV/0!
ath-miR5645b	#DIV/0!	#DIV/0!	#DIV/0!	#DIV/0!	#DIV/0!	#DIV/0!	#DIV/0!	#DIV/0!	#DIV/0!	#DIV/0!	#DIV/0!	#DIV/0!	#DIV/0!	#DIV/0!	#DIV/0!	#DIV/0!	#DIV/0!	#DIV/0!	#DIV/0!	#DIV/0!	#DIV/0!	#DIV/0!	#DIV/0!	#DIV/0!
ath-miR5645c	#DIV/0!	#DIV/0!	#DIV/0!	#DIV/0!	#DIV/0!	#DIV/0!	#DIV/0!	#DIV/0!	#DIV/0!	#DIV/0!	#DIV/0!	#DIV/0!	0	0	0	1	#DIV/0!	#DIV/0!	#DIV/0!	#DIV/0!	#DIV/0!	#DIV/0!	#DIV/0!	#DIV/0!
ath-miR5645d	#DIV/0!	#DIV/0!	#DIV/0!	#DIV/0!	#DIV/0!	#DIV/0!	#DIV/0!	#DIV/0!	#DIV/0!	#DIV/0!	#DIV/0!	#DIV/0!	#DIV/0!	#DIV/0!	#DIV/0!	#DIV/0!	#DIV/0!	#DIV/0!	#DIV/0!	#DIV/0!	#DIV/0!	#DIV/0!	#DIV/0!	#DIV/0!
ath-miR5645e	#DIV/0!	#DIV/0!	#DIV/0!	#DIV/0!	#DIV/0!	#DIV/0!	#DIV/0!	#DIV/0!	#DIV/0!	#DIV/0!	#DIV/0!	#DIV/0!	#DIV/0!	#DIV/0!	#DIV/0!	#DIV/0!	#DIV/0!	#DIV/0!	#DIV/0!	#DIV/0!	#DIV/0!	#DIV/0!	#DIV/0!	#DIV/0!
ath-miR5645f	#DIV/0!	#DIV/0!	#DIV/0!	#DIV/0!	#DIV/0!	#DIV/0!	#DIV/0!	#DIV/0!	#DIV/0!	#DIV/0!	#DIV/0!	#DIV/0!	#DIV/0!	#DIV/0!	#DIV/0!	#DIV/0!	#DIV/0!	#DIV/0!	#DIV/0!	#DIV/0!	#DIV/0!	#DIV/0!	#DIV/0!	#DIV/0!
ath-miR5646	#DIV/0!	#DIV/0!	#DIV/0!	#DIV/0!	#DIV/0!	#DIV/0!	#DIV/0!	#DIV/0!	#DIV/0!	#DIV/0!	#DIV/0!	#DIV/0!	#DIV/0!	#DIV/0!	#DIV/0!	#DIV/0!	#DIV/0!	#DIV/0!	#DIV/0!	#DIV/0!	#DIV/0!	#DIV/0!	#DIV/0!	#DIV/0!
ath-miR5647	0	0	1	0	0	0	0	1	0	0	1	0	0	0	0.75	0.25	0	0	0	1	#DIV/0!	#DIV/0!	#DIV/0!	#DIV/0!
ath-miR5648-3p	#DIV/0!	#DIV/0!	#DIV/0!	#DIV/0!	#DIV/0!	#DIV/0!	#DIV/0!	#DIV/0!	#DIV/0!	#DIV/0!	#DIV/0!	#DIV/0!	#DIV/0!	#DIV/0!	#DIV/0!	#DIV/0!	#DIV/0!	#DIV/0!	#DIV/0!	#DIV/0!	#DIV/0!	#DIV/0!	#DIV/0!	#DIV/0!
ath-miR5648-5p	0.714286	0	0.285714	0	0.538461	0	0.153846	0.307693	0.538462	0	0.0769231	0.384615	0.5625	0	0.15625	0.28125	0.846154	0	0	0.153846	0.714286	0	0.142857	0.142857
ath-miR5649a	#DIV/0!	#DIV/0!	#DIV/0!	#DIV/0!	#DIV/0!	#DIV/0!	#DIV/0!	#DIV/0!	#DIV/0!	#DIV/0!	#DIV/0!	#DIV/0!	#DIV/0!	#DIV/0!	#DIV/0!	#DIV/0!	#DIV/0!	#DIV/0!	#DIV/0!	#DIV/0!	#DIV/0!	#DIV/0!	#DIV/0!	#DIV/0!
ath-miR5649b	#DIV/0!	#DIV/0!	#DIV/0!	#DIV/0!	#DIV/0!	#DIV/0!	#DIV/0!	#DIV/0!	#DIV/0!	#DIV/0!	#DIV/0!	#DIV/0!	#DIV/0!	#DIV/0!	#DIV/0!	#DIV/0!	#DIV/0!	#DIV/0!	#DIV/0!	#DIV/0!	#DIV/0!	#DIV/0!	#DIV/0!	#DIV/0!
ath-miR5650	0.880597	0	0.0820894	0.0373135	0.807692	0	0.134615	0.0576922	0.904762	0	0.047619	0.047619	0.859649	0	0.116959	0.0233918	0.81081	0	0.081081	0.108109	0.956522	0	0	0.0434782
ath-miR5651	0.553571	0.0535714	0.303571	0.0892859	0.558442	0.025974	0.311688	0.103896	0.461539	0.076923	0.461539	0	0.636363	0.00826447	0.297521	0.0578513	0.843751	0	0.0624999	0.0937494	0.76	0.08	0.12	0.04
ath-miR5652	0.833333	0	0.0833333	0.0833333	1	0	0	0	0.6875	0	0	0.3125	0.827586	0	0.0344828	0.137931	1	0	0	0	1	0	0	0
ath-miR5653	0	0	0.833333	0.166667	0.0454544	0	0.909091	0.0454544	0	0	0.75	0.25	0	0	1	0	0	0	1	0	#DIV/0!	#DIV/0!	#DIV/0!	#DIV/0!
ath-miR5654-3p	0.767372	0	0.172205	0.060423	0.799427	0	0.143267	0.0573066	0.753226	0	0.180645	0.066129	0.72615	0.00274537	0.227865	0.0432395	0.780702	0.00438597	0.175439	0.0394737	0.793296	0	0.167598	0.0391062
ath-miR5654-5p	#DIV/0!	#DIV/0!	#DIV/0!	#DIV/0!	#DIV/0!	#DIV/0!	#DIV/0!	#DIV/0!	#DIV/0!	#DIV/0!	#DIV/0!	#DIV/0!	1	0	0	0	#DIV/0!	#DIV/0!	#DIV/0!	#DIV/0!	#DIV/0!	#DIV/0!	#DIV/0!	#DIV/0!
ath-miR5655	#DIV/0!	#DIV/0!	#DIV/0!	#DIV/0!	#DIV/0!	#DIV/0!	#DIV/0!	#DIV/0!	#DIV/0!	#DIV/0!	#DIV/0!	#DIV/0!	#DIV/0!	#DIV/0!	#DIV/0!	#DIV/0!	#DIV/0!	#DIV/0!	#DIV/0!	#DIV/0!	#DIV/0!	#DIV/0!	#DIV/0!	#DIV/0!
ath-miR5656	#DIV/0!	#DIV/0!	#DIV/0!	#DIV/0!	#DIV/0!	#DIV/0!	#DIV/0!	#DIV/0!	#DIV/0!	#DIV/0!	#DIV/0!	#DIV/0!	1	0	0	0	1	0	0	0	#DIV/0!	#DIV/0!	#DIV/0!	#DIV/0!
ath-miR5657	0	0	0	1	0	0	0	1	0	0.333334	0	0.666666	0	0	0.272727	0.727273	0	0	0	1	0	0	0.333333	0.666667
ath-miR5658	#DIV/0!	#DIV/0!	#DIV/0!	#DIV/0!	#DIV/0!	#DIV/0!	#DIV/0!	#DIV/0!	0	0	1	0	#DIV/0!	#DIV/0!	#DIV/0!	#DIV/0!	#DIV/0!	#DIV/0!	#DIV/0!	#DIV/0!	0	0	1	0
ath-miR5659	#DIV/0!	#DIV/0!	#DIV/0!	#DIV/0!	#DIV/0!	#DIV/0!	#DIV/0!	#DIV/0!	#DIV/0!	#DIV/0!	#DIV/0!	#DIV/0!	#DIV/0!	#DIV/0!	#DIV/0!	#DIV/0!	#DIV/0!	#DIV/0!	#DIV/0!	#DIV/0!	#DIV/0!	#DIV/0!	#DIV/0!	#DIV/0!
ath-miR5660	#DIV/0!	#DIV/0!	#DIV/0!	#DIV/0!	#DIV/0!	#DIV/0!	#DIV/0!	#DIV/0!	#DIV/0!	#DIV/0!	#DIV/0!	#DIV/0!	0	0	0	1	#DIV/0!	#DIV/0!	#DIV/0!	#DIV/0!	#DIV/0!	#DIV/0!	#DIV/0!	#DIV/0!
ath-miR5661	#DIV/0!	#DIV/0!	#DIV/0!	#DIV/0!	#DIV/0!	#DIV/0!	#DIV/0!	#DIV/0!	#DIV/0!	#DIV/0!	#DIV/0!	#DIV/0!	#DIV/0!	#DIV/0!	#DIV/0!	#DIV/0!	#DIV/0!	#DIV/0!	#DIV/0!	#DIV/0!	#DIV/0!	#DIV/0!	#DIV/0!	#DIV/0!
ath-miR5662	#DIV/0!	#DIV/0!	#DIV/0!	#DIV/0!	#DIV/0!	#DIV/0!	#DIV/0!	#DIV/0!	#DIV/0!	#DIV/0!	#DIV/0!	#DIV/0!	#DIV/0!	#DIV/0!	#DIV/0!	#DIV/0!	#DIV/0!	#DIV/0!	#DIV/0!	#DIV/0!	#DIV/0!	#DIV/0!	#DIV/0!	#DIV/0!
ath-miR5663-3p	#DIV/0!	#DIV/0!	#DIV/0!	#DIV/0!	#DIV/0!	#DIV/0!	#DIV/0!	#DIV/0!	1	0	0	0	#DIV/0!	#DIV/0!	#DIV/0!	#DIV/0!	#DIV/0!	#DIV/0!	#DIV/0!	#DIV/0!	#DIV/0!	#DIV/0!	#DIV/0!	#DIV/0!
ath-miR5663-5p	#DIV/0!	#DIV/0!	#DIV/0!	#DIV/0!	#DIV/0!	#DIV/0!	#DIV/0!	#DIV/0!	#DIV/0!	#DIV/0!	#DIV/0!	#DIV/0!	#DIV/0!	#DIV/0!	#DIV/0!	#DIV/0!	1	0	0	0	#DIV/0!	#DIV/0!	#DIV/0!	#DIV/0!
ath-miR5664	#DIV/0!	#DIV/0!	#DIV/0!	#DIV/0!	#DIV/0!	#DIV/0!	#DIV/0!	#DIV/0!	#DIV/0!	#DIV/0!	#DIV/0!	#DIV/0!	#DIV/0!	#DIV/0!	#DIV/0!	#DIV/0!	#DIV/0!	#DIV/0!	#DIV/0!	#DIV/0!	#DIV/0!	#DIV/0!	#DIV/0!	#DIV/0!
ath-miR5665	0	0	0	1	#DIV/0!	#DIV/0!	#DIV/0!	#DIV/0!	0	0	0	1	#DIV/0!	#DIV/0!	#DIV/0!	#DIV/0!	#DIV/0!	#DIV/0!	#DIV/0!	#DIV/0!	#DIV/0!	#DIV/0!	#DIV/0!	#DIV/0!
ath-miR5666	#DIV/0!	#DIV/0!	#DIV/0!	#DIV/0!	#DIV/0!	#DIV/0!	#DIV/0!	#DIV/0!	#DIV/0!	#DIV/0!	#DIV/0!	#DIV/0!	#DIV/0!	#DIV/0!	#DIV/0!	#DIV/0!	#DIV/0!	#DIV/0!	#DIV/0!	#DIV/0!	#DIV/0!	#DIV/0!	#DIV/0!	#DIV/0!
ath-miR5995b	1	0	0	0	1	0	0	0	1	0	0	0	0.666666	0	0	0.333334	#DIV/0!	#DIV/0!	#DIV/0!	#DIV/0!	1	0	0	0
ath-miR5996	0.433645	0.00373832	0.448598	0.114019	0.577553	0.00252207	0.335435	0.0844895	0.647059	0.0117647	0.276471	0.0647059	0.549579	0.0100841	0.391597	0.0487396	0.631841	0.0199005	0.263682	0.0845772	0.59322	0.0254238	0.254238	0.127119
ath-miR5997	1	0	0	0	#DIV/0!	#DIV/0!	#DIV/0!	#DIV/0!	1	0	0	0	1	0	0	0	#DIV/0!	#DIV/0!	#DIV/0!	#DIV/0!	0	0	1	0
ath-miR5998a	#DIV/0!	#DIV/0!	#DIV/0!	#DIV/0!	#DIV/0!	#DIV/0!	#DIV/0!	#DIV/0!	#DIV/0!	#DIV/0!	#DIV/0!	#DIV/0!	#DIV/0!	#DIV/0!	#DIV/0!	#DIV/0!	#DIV/0!	#DIV/0!	#DIV/0!	#DIV/0!	#DIV/0!	#DIV/0!	#DIV/0!	#DIV/0!
ath-miR5998b	#DIV/0!	#DIV/0!	#DIV/0!	#DIV/0!	#DIV/0!	#DIV/0!	#DIV/0!	#DIV/0!	#DIV/0!	#DIV/0!	#DIV/0!	#DIV/0!	#DIV/0!	#DIV/0!	#DIV/0!	#DIV/0!	#DIV/0!	#DIV/0!	#DIV/0!	#DIV/0!	#DIV/0!	#DIV/0!	#DIV/0!	#DIV/0!
ath-miR5999	0	0	1	0	#DIV/0!	#DIV/0!	#DIV/0!	#DIV/0!	#DIV/0!	#DIV/0!	#DIV/0!	#DIV/0!	0	1	0	0	#DIV/0!	#DIV/0!	#DIV/0!	#DIV/0!	#DIV/0!	#DIV/0!	#DIV/0!	#DIV/0!
ath-miR771	0	0	0.666667	0.333333	0.166666	0	0.5	0.333334	0	0	1	0	0.272727	0	0.727273	0	0.200001	0	0.599999	0.200001	0	0.666667	0.333333	0
ath-miR773a	0.0266667	0.0666666	0.0133333	0.893333	0.0205128	0.117949	0.0153846	0.846154	0.021978	0.0686813	0.0494505	0.85989	0.0175879	0.0720269	0.038526	0.871859	0.00181653	0.096276	0.0108992	0.891008	0.00776916	0.0943397	0.0155383	0.882353
ath-miR773b-3p	0	0	0	1	#DIV/0!	#DIV/0!	#DIV/0!	#DIV/0!	0	0	0	1	0	0	0	1	0	0.5	0	0.5	#DIV/0!	#DIV/0!	#DIV/0!	#DIV/0!
ath-miR774a	#DIV/0!	#DIV/0!	#DIV/0!	#DIV/0!	#DIV/0!	#DIV/0!	#DIV/0!	#DIV/0!	#DIV/0!	#DIV/0!	#DIV/0!	#DIV/0!	#DIV/0!	#DIV/0!	#DIV/0!	#DIV/0!	#DIV/0!	#DIV/0!	#DIV/0!	#DIV/0!	#DIV/0!	#DIV/0!	#DIV/0!	#DIV/0!
ath-miR775	0.115033	0.0228758	0.0980392	0.764052	0.122671	0.0186335	0.0631469	0.795549	0.62095	0.00828938	0.125848	0.244913	0.514668	0.0126253	0.168957	0.30375	0.365384	0.0357141	0.163462	0.43544	0.416504	0.049116	0.149312	0.385068
ath-miR776	#DIV/0!	#DIV/0!	#DIV/0!	#DIV/0!	#DIV/0!	#DIV/0!	#DIV/0!	#DIV/0!	#DIV/0!	#DIV/0!	#DIV/0!	#DIV/0!	#DIV/0!	#DIV/0!	#DIV/0!	#DIV/0!	#DIV/0!	#DIV/0!	#DIV/0!	#DIV/0!	#DIV/0!	#DIV/0!	#DIV/0!	#DIV/0!
ath-miR777	#DIV/0!	#DIV/0!	#DIV/0!	#DIV/0!	#DIV/0!	#DIV/0!	#DIV/0!	#DIV/0!	1	0	0	0	0.9	0	0	0.1	0.675676	0.027027	0.135135	0.162162	0.772727	0	0.0227273	0.204546
ath-miR778	#DIV/0!	#DIV/0!	#DIV/0!	#DIV/0!	#DIV/0!	#DIV/0!	#DIV/0!	#DIV/0!	#DIV/0!	#DIV/0!	#DIV/0!	#DIV/0!	#DIV/0!	#DIV/0!	#DIV/0!	#DIV/0!	#DIV/0!	#DIV/0!	#DIV/0!	#DIV/0!	#DIV/0!	#DIV/0!	#DIV/0!	#DIV/0!
ath-miR779.1	0	0	0	1	0	0	0	1	0	0	0.4	0.6	0	0.0689655	0.137931	0.793103	0	0.0909091	0	0.909091	0	0.076923	0.076923	0.846154
ath-miR779.2	0.772727	0.0909091	0	0.136364	0.794118	0	0	0.205882	0.8125	0.0208333	0.0833333	0.0833333	0.825581	0.0116279	0.0872094	0.0755815	0.75	0.0249999	0.0333334	0.191667	0.775	0.025	0.025	0.175
ath-miR780.1	0.764705	0	0	0.235295	0.818182	0	0	0.181818	1	0	0	0	0.785714	0	0	0.214286	0.5	0	0	0.5	1	0	0	0
ath-miR780.2	0.5	0	0.5	0	0	0	0	1	0.5	0	0	0.5	0.75	0	0	0.25	0.666667	0.333333	0	0	1	0	0	0
ath-miR781a	0.500001	0.0107527	0.0591398	0.430107	0.483791	0	0.0847881	0.431421	0.541176	0.00588235	0.258824	0.194118	0.549495	0.0040404	0.258586	0.187879	0.495495	0.0135135	0.31982	0.171171	0.557047	0	0.255033	0.18792
ath-miR781b	0.500001	0.0107527	0.0591398	0.430107	0.483791	0	0.0847881	0.431421	0.541176	0.00588235	0.258824	0.194118	0.549495	0.0040404	0.258586	0.187879	0.495495	0.0135135	0.31982	0.171171	0.557047	0	0.255033	0.18792
ath-miR782	#DIV/0!	#DIV/0!	#DIV/0!	#DIV/0!	#DIV/0!	#DIV/0!	#DIV/0!	#DIV/0!	#DIV/0!	#DIV/0!	#DIV/0!	#DIV/0!	#DIV/0!	#DIV/0!	#DIV/0!	#DIV/0!	#DIV/0!	#DIV/0!	#DIV/0!	#DIV/0!	#DIV/0!	#DIV/0!	#DIV/0!	#DIV/0!
ath-miR8121	#DIV/0!	#DIV/0!	#DIV/0!	#DIV/0!	#DIV/0!	#DIV/0!	#DIV/0!	#DIV/0!	#DIV/0!	#DIV/0!	#DIV/0!	#DIV/0!	#DIV/0!	#DIV/0!	#DIV/0!	#DIV/0!	#DIV/0!	#DIV/0!	#DIV/0!	#DIV/0!	#DIV/0!	#DIV/0!	#DIV/0!	#DIV/0!
ath-miR8165	#DIV/0!	#DIV/0!	#DIV/0!	#DIV/0!	#DIV/0!	#DIV/0!	#DIV/0!	#DIV/0!	#DIV/0!	#DIV/0!	#DIV/0!	#DIV/0!	#DIV/0!	#DIV/0!	#DIV/0!	#DIV/0!	#DIV/0!	#DIV/0!	#DIV/0!	#DIV/0!	#DIV/0!	#DIV/0!	#DIV/0!	#DIV/0!
ath-miR8166	#DIV/0!	#DIV/0!	#DIV/0!	#DIV/0!	#DIV/0!	#DIV/0!	#DIV/0!	#DIV/0!	0	0	1	0	#DIV/0!	#DIV/0!	#DIV/0!	#DIV/0!	#DIV/0!	#DIV/0!	#DIV/0!	#DIV/0!	#DIV/0!	#DIV/0!	#DIV/0!	#DIV/0!
ath-miR8167a	#DIV/0!	#DIV/0!	#DIV/0!	#DIV/0!	#DIV/0!	#DIV/0!	#DIV/0!	#DIV/0!	#DIV/0!	#DIV/0!	#DIV/0!	#DIV/0!	#DIV/0!	#DIV/0!	#DIV/0!	#DIV/0!	#DIV/0!	#DIV/0!	#DIV/0!	#DIV/0!	#DIV/0!	#DIV/0!	#DIV/0!	#DIV/0!
ath-miR8167b	#DIV/0!	#DIV/0!	#DIV/0!	#DIV/0!	#DIV/0!	#DIV/0!	#DIV/0!	#DIV/0!	#DIV/0!	#DIV/0!	#DIV/0!	#DIV/0!	#DIV/0!	#DIV/0!	#DIV/0!	#DIV/0!	#DIV/0!	#DIV/0!	#DIV/0!	#DIV/0!	#DIV/0!	#DIV/0!	#DIV/0!	#DIV/0!
ath-miR8167c	#DIV/0!	#DIV/0!	#DIV/0!	#DIV/0!	#DIV/0!	#DIV/0!	#DIV/0!	#DIV/0!	#DIV/0!	#DIV/0!	#DIV/0!	#DIV/0!	#DIV/0!	#DIV/0!	#DIV/0!	#DIV/0!	#DIV/0!	#DIV/0!	#DIV/0!	#DIV/0!	#DIV/0!	#DIV/0!	#DIV/0!	#DIV/0!
ath-miR8167d	#DIV/0!	#DIV/0!	#DIV/0!	#DIV/0!	#DIV/0!	#DIV/0!	#DIV/0!	#DIV/0!	#DIV/0!	#DIV/0!	#DIV/0!	#DIV/0!	#DIV/0!	#DIV/0!	#DIV/0!	#DIV/0!	#DIV/0!	#DIV/0!	#DIV/0!	#DIV/0!	#DIV/0!	#DIV/0!	#DIV/0!	#DIV/0!
ath-miR8167e	#DIV/0!	#DIV/0!	#DIV/0!	#DIV/0!	#DIV/0!	#DIV/0!	#DIV/0!	#DIV/0!	#DIV/0!	#DIV/0!	#DIV/0!	#DIV/0!	#DIV/0!	#DIV/0!	#DIV/0!	#DIV/0!	#DIV/0!	#DIV/0!	#DIV/0!	#DIV/0!	#DIV/0!	#DIV/0!	#DIV/0!	#DIV/0!
ath-miR8167f	#DIV/0!	#DIV/0!	#DIV/0!	#DIV/0!	#DIV/0!	#DIV/0!	#DIV/0!	#DIV/0!	#DIV/0!	#DIV/0!	#DIV/0!	#DIV/0!	#DIV/0!	#DIV/0!	#DIV/0!	#DIV/0!	#DIV/0!	#DIV/0!	#DIV/0!	#DIV/0!	#DIV/0!	#DIV/0!	#DIV/0!	#DIV/0!
ath-miR8168	#DIV/0!	#DIV/0!	#DIV/0!	#DIV/0!	#DIV/0!	#DIV/0!	#DIV/0!	#DIV/0!	#DIV/0!	#DIV/0!	#DIV/0!	#DIV/0!	0	0	0	1	#DIV/0!	#DIV/0!	#DIV/0!	#DIV/0!	#DIV/0!	#DIV/0!	#DIV/0!	#DIV/0!
ath-miR8169	#DIV/0!	#DIV/0!	#DIV/0!	#DIV/0!	#DIV/0!	#DIV/0!	#DIV/0!	#DIV/0!	#DIV/0!	#DIV/0!	#DIV/0!	#DIV/0!	#DIV/0!	#DIV/0!	#DIV/0!	#DIV/0!	1	0	0	0	#DIV/0!	#DIV/0!	#DIV/0!	#DIV/0!
ath-miR8170-3p	0.25	0	0	0.75	0	0	0	1	#DIV/0!	#DIV/0!	#DIV/0!	#DIV/0!	0	0.5	0.5	0	1	0	0	0	#DIV/0!	#DIV/0!	#DIV/0!	#DIV/0!
ath-miR8170-5p	#DIV/0!	#DIV/0!	#DIV/0!	#DIV/0!	#DIV/0!	#DIV/0!	#DIV/0!	#DIV/0!	#DIV/0!	#DIV/0!	#DIV/0!	#DIV/0!	#DIV/0!	#DIV/0!	#DIV/0!	#DIV/0!	#DIV/0!	#DIV/0!	#DIV/0!	#DIV/0!	#DIV/0!	#DIV/0!	#DIV/0!	#DIV/0!
ath-miR8171	#DIV/0!	#DIV/0!	#DIV/0!	#DIV/0!	#DIV/0!	#DIV/0!	#DIV/0!	#DIV/0!	0	0	0	1	#DIV/0!	#DIV/0!	#DIV/0!	#DIV/0!	#DIV/0!	#DIV/0!	#DIV/0!	#DIV/0!	#DIV/0!	#DIV/0!	#DIV/0!	#DIV/0!
ath-miR8172	#DIV/0!	#DIV/0!	#DIV/0!	#DIV/0!	#DIV/0!	#DIV/0!	#DIV/0!	#DIV/0!	#DIV/0!	#DIV/0!	#DIV/0!	#DIV/0!	#DIV/0!	#DIV/0!	#DIV/0!	#DIV/0!	#DIV/0!	#DIV/0!	#DIV/0!	#DIV/0!	#DIV/0!	#DIV/0!	#DIV/0!	#DIV/0!
ath-miR8173	#DIV/0!	#DIV/0!	#DIV/0!	#DIV/0!	#DIV/0!	#DIV/0!	#DIV/0!	#DIV/0!	#DIV/0!	#DIV/0!	#DIV/0!	#DIV/0!	#DIV/0!	#DIV/0!	#DIV/0!	#DIV/0!	#DIV/0!	#DIV/0!	#DIV/0!	#DIV/0!	#DIV/0!	#DIV/0!	#DIV/0!	#DIV/0!
ath-miR8174	#DIV/0!	#DIV/0!	#DIV/0!	#DIV/0!	#DIV/0!	#DIV/0!	#DIV/0!	#DIV/0!	#DIV/0!	#DIV/0!	#DIV/0!	#DIV/0!	#DIV/0!	#DIV/0!	#DIV/0!	#DIV/0!	#DIV/0!	#DIV/0!	#DIV/0!	#DIV/0!	#DIV/0!	#DIV/0!	#DIV/0!	#DIV/0!
ath-miR8175	#DIV/0!	#DIV/0!	#DIV/0!	#DIV/0!	#DIV/0!	#DIV/0!	#DIV/0!	#DIV/0!	#DIV/0!	#DIV/0!	#DIV/0!	#DIV/0!	#DIV/0!	#DIV/0!	#DIV/0!	#DIV/0!	#DIV/0!	#DIV/0!	#DIV/0!	#DIV/0!	#DIV/0!	#DIV/0!	#DIV/0!	#DIV/0!
ath-miR8177	#DIV/0!	#DIV/0!	#DIV/0!	#DIV/0!	#DIV/0!	#DIV/0!	#DIV/0!	#DIV/0!	#DIV/0!	#DIV/0!	#DIV/0!	#DIV/0!	#DIV/0!	#DIV/0!	#DIV/0!	#DIV/0!	#DIV/0!	#DIV/0!	#DIV/0!	#DIV/0!	#DIV/0!	#DIV/0!	#DIV/0!	#DIV/0!
ath-miR8178	#DIV/0!	#DIV/0!	#DIV/0!	#DIV/0!	#DIV/0!	#DIV/0!	#DIV/0!	#DIV/0!	#DIV/0!	#DIV/0!	#DIV/0!	#DIV/0!	#DIV/0!	#DIV/0!	#DIV/0!	#DIV/0!	#DIV/0!	#DIV/0!	#DIV/0!	#DIV/0!	#DIV/0!	#DIV/0!	#DIV/0!	#DIV/0!
ath-miR8179	#DIV/0!	#DIV/0!	#DIV/0!	#DIV/0!	0.75	0	0.25	0	0.6	0	0.4	0	0.888889	0	0.111111	0	0.333333	0	0.333333	0.333333	0.5	0	0	0.5
ath-miR8180	0	0	1	0	#DIV/0!	#DIV/0!	#DIV/0!	#DIV/0!	0	0	0	1	0.666666	0	0.333334	0	#DIV/0!	#DIV/0!	#DIV/0!	#DIV/0!	#DIV/0!	#DIV/0!	#DIV/0!	#DIV/0!
ath-miR8181	#DIV/0!	#DIV/0!	#DIV/0!	#DIV/0!	#DIV/0!	#DIV/0!	#DIV/0!	#DIV/0!	#DIV/0!	#DIV/0!	#DIV/0!	#DIV/0!	#DIV/0!	#DIV/0!	#DIV/0!	#DIV/0!	#DIV/0!	#DIV/0!	#DIV/0!	#DIV/0!	#DIV/0!	#DIV/0!	#DIV/0!	#DIV/0!
ath-miR8182	0.727272	0	0.272728	0	0.777777	0	0	0.222223	0.666667	0	0.333333	0	0.72	0	0.2	0.0799999	0.666667	0	0.222222	0.111111	1	0	0	0
ath-miR8183	0.528302	0	0.358491	0.113208	0.697675	0	0.232558	0.0697675	0.705882	0	0.294118	0	0.625	0	0.25	0.125	0.636363	0.0909092	0.0909092	0.181818	0.625	0	0.125	0.25
ath-miR8184	0	0	0.777778	0.222222	0	0	0.666666	0.333334	1	0	0	0	0	0	1	0	#DIV/0!	#DIV/0!	#DIV/0!	#DIV/0!	1	0	0	0
ath-miR822-3p	0.323529	0	0.0882353	0.588236	0.239999	0.12	0.16	0.480001	0.68421	0	0.0526316	0.263158	0.507692	0.123077	0.0615386	0.307693	0.603774	0.0943394	0.0754717	0.226415	0.589744	0.051282	0.025641	0.333333
ath-miR822-5p	0.735849	0.0471699	0.0566039	0.160377	0.634329	0.00746266	0.149254	0.208955	0.684636	0.0134771	0.185984	0.115903	0.727699	0.0300471	0.159625	0.0826291	0.703937	0.0393701	0.132283	0.12441	0.663917	0.043299	0.101031	0.191753
ath-miR823	0.555556	0	0.4	0.0444445	0.609329	0	0.28863	0.102041	0.736	0	0.216	0.048	0.68458	0.00700934	0.238318	0.0700934	0.6875	0.0416667	0.1875	0.0833335	0.789474	0	0.131579	0.0789474
ath-miR824-3p	0.5	0	0	0.5	1	0	0	0	0.6	0	0.2	0.2	0.75	0	0	0.25	0.4	0	0.2	0.4	0.555555	0.333334	0.111111	0
ath-miR824-5p	0.777778	0.0123457	0.0493829	0.160494	0.746268	0.0373135	0.0895526	0.126866	0.54386	0.0526316	0.210526	0.192982	0.736434	0.0232558	0.116279	0.124031	0.726027	0.0684932	0.0890411	0.116438	0.717742	0.0806451	0.0725807	0.129032
ath-miR825	0.665574	0.188525	0.0885244	0.0573771	0.633577	0.226277	0.0788321	0.0613139	0.899471	0.0238095	0.0291005	0.047619	0.885058	0.0265252	0.0477453	0.040672	0.774675	0.134078	0.0279329	0.0633144	0.800525	0.11811	0.023622	0.0577427
ath-miR826a	#DIV/0!	#DIV/0!	#DIV/0!	#DIV/0!	1	0	0	0	#DIV/0!	#DIV/0!	#DIV/0!	#DIV/0!	#DIV/0!	#DIV/0!	#DIV/0!	#DIV/0!	1	0	0	0	1	0	0	0
ath-miR826b	#DIV/0!	#DIV/0!	#DIV/0!	#DIV/0!	#DIV/0!	#DIV/0!	#DIV/0!	#DIV/0!	#DIV/0!	#DIV/0!	#DIV/0!	#DIV/0!	#DIV/0!	#DIV/0!	#DIV/0!	#DIV/0!	#DIV/0!	#DIV/0!	#DIV/0!	#DIV/0!	#DIV/0!	#DIV/0!	#DIV/0!	#DIV/0!
ath-miR827	0.615384	0.076923	0	0.307693	0.684211	0	0.105263	0.210526	0.125	0.25	0.375	0.25	0.5	0.0454546	0.318182	0.136364	0.600001	0.15	0.1	0.15	0.384616	0.153846	0	0.461538
ath-miR828	1	0	0	0	0.666667	0	0.333333	0	0	0	1	0	0.272727	0.0909091	0.454546	0.181818	0.400001	0	0	0.599999	0.750001	0.249999	0	0
ath-miR829-3p.1	#DIV/0!	#DIV/0!	#DIV/0!	#DIV/0!	#DIV/0!	#DIV/0!	#DIV/0!	#DIV/0!	#DIV/0!	#DIV/0!	#DIV/0!	#DIV/0!	#DIV/0!	#DIV/0!	#DIV/0!	#DIV/0!	1	0	0	0	#DIV/0!	#DIV/0!	#DIV/0!	#DIV/0!
ath-miR829-3p.2	0.5	0	0.25	0.25	0.875	0	0.125	0	0.5	0	0	0.5	0.9	0	0.1	0	0.875	0.125	0	0	0.666667	0.333333	0	0
ath-miR829-5p	1	0	0	0	0.4	0	0.2	0.4	1	0	0	0	1	0	0	0	0.166667	0	0.833333	0	0.5	0	0.5	0
ath-miR830-3p	#DIV/0!	#DIV/0!	#DIV/0!	#DIV/0!	1	0	0	0	#DIV/0!	#DIV/0!	#DIV/0!	#DIV/0!	1	0	0	0	#DIV/0!	#DIV/0!	#DIV/0!	#DIV/0!	0.666667	0	0	0.333333
ath-miR830-5p	1	0	0	0	1	0	0	0	1	0	0	0	0.666666	0	0	0.333334	#DIV/0!	#DIV/0!	#DIV/0!	#DIV/0!	0.5	0	0	0.5
ath-miR831-3p	0.949593	0.00162602	0	0.0487805	0.926396	0.00126903	0	0.0723353	0.904762	0	0.0634921	0.031746	0.964824	0	0.00502513	0.0301508	0.954545	0	0.0454546	0	0.923077	0	0.0769231	0
ath-miR831-5p	#DIV/0!	#DIV/0!	#DIV/0!	#DIV/0!	#DIV/0!	#DIV/0!	#DIV/0!	#DIV/0!	#DIV/0!	#DIV/0!	#DIV/0!	#DIV/0!	#DIV/0!	#DIV/0!	#DIV/0!	#DIV/0!	#DIV/0!	#DIV/0!	#DIV/0!	#DIV/0!	#DIV/0!	#DIV/0!	#DIV/0!	#DIV/0!
ath-miR832-3p	#DIV/0!	#DIV/0!	#DIV/0!	#DIV/0!	#DIV/0!	#DIV/0!	#DIV/0!	#DIV/0!	#DIV/0!	#DIV/0!	#DIV/0!	#DIV/0!	#DIV/0!	#DIV/0!	#DIV/0!	#DIV/0!	#DIV/0!	#DIV/0!	#DIV/0!	#DIV/0!	#DIV/0!	#DIV/0!	#DIV/0!	#DIV/0!
ath-miR832-5p	#DIV/0!	#DIV/0!	#DIV/0!	#DIV/0!	#DIV/0!	#DIV/0!	#DIV/0!	#DIV/0!	#DIV/0!	#DIV/0!	#DIV/0!	#DIV/0!	#DIV/0!	#DIV/0!	#DIV/0!	#DIV/0!	#DIV/0!	#DIV/0!	#DIV/0!	#DIV/0!	#DIV/0!	#DIV/0!	#DIV/0!	#DIV/0!
ath-miR833a-3p	#DIV/0!	#DIV/0!	#DIV/0!	#DIV/0!	1	0	0	0	0	0	1	0	0	0	1	0	#DIV/0!	#DIV/0!	#DIV/0!	#DIV/0!	#DIV/0!	#DIV/0!	#DIV/0!	#DIV/0!
ath-miR833a-5p	0.663266	0	0.163265	0.173469	0.73913	0	0.146739	0.11413	0.595238	0	0.357143	0.047619	0.469879	0.0120482	0.409638	0.108434	0.551724	0	0.344828	0.103448	0.375	0	0.25	0.375
ath-miR833b	0.333334	0.333334	0.166666	0.166666	0.3125	0.562499	0	0.125	0	0	0.75	0.25	0.222222	0.444445	0.222222	0.111111	0.272726	0.363637	0.181818	0.181818	0.5	0	0	0.5
ath-miR834	#DIV/0!	#DIV/0!	#DIV/0!	#DIV/0!	1	0	0	0	0	0	1	0	1	0	0	0	#DIV/0!	#DIV/0!	#DIV/0!	#DIV/0!	#DIV/0!	#DIV/0!	#DIV/0!	#DIV/0!
ath-miR835-3p	1	0	0	0	0	1	0	0	#DIV/0!	#DIV/0!	#DIV/0!	#DIV/0!	0	0	1	0	#DIV/0!	#DIV/0!	#DIV/0!	#DIV/0!	#DIV/0!	#DIV/0!	#DIV/0!	#DIV/0!
ath-miR835-5p	1	0	0	0	#DIV/0!	#DIV/0!	#DIV/0!	#DIV/0!	#DIV/0!	#DIV/0!	#DIV/0!	#DIV/0!	0.75	0.25	0	0	0.5	0.5	0	0	1	0	0	0
ath-miR836	#DIV/0!	#DIV/0!	#DIV/0!	#DIV/0!	#DIV/0!	#DIV/0!	#DIV/0!	#DIV/0!	0	0	0	1	0	0	1	0	#DIV/0!	#DIV/0!	#DIV/0!	#DIV/0!	#DIV/0!	#DIV/0!	#DIV/0!	#DIV/0!
ath-miR837-3p	#DIV/0!	#DIV/0!	#DIV/0!	#DIV/0!	1	0	0	0	0.5	0	0.5	0	0.6	0	0	0.4	#DIV/0!	#DIV/0!	#DIV/0!	#DIV/0!	#DIV/0!	#DIV/0!	#DIV/0!	#DIV/0!
ath-miR837-5p	0	0	0	1	1	0	0	0	1	0	0	0	1	0	0	0	#DIV/0!	#DIV/0!	#DIV/0!	#DIV/0!	1	0	0	0
ath-miR838	0.722772	0	0.247525	0.029703	0.788236	0	0.188235	0.0235294	0.846154	0	0.120879	0.032967	0.78077	0.00384616	0.184615	0.0307693	0.853933	0	0.101123	0.0449438	0.865671	0.0298508	0.0447763	0.0597015
ath-miR839-5p	0.818182	0.0909091	0	0.0909091	0.875	0	0	0.125	0.836735	0.0204082	0	0.142857	0.821428	0.0306123	0.0102041	0.137755	0.740741	0.0740741	0.0740741	0.111111	0.72093	0.0465117	0.0465117	0.186047
ath-miR840-3p	0.319277	0.0421688	0.0421688	0.596386	0.22093	0.0813954	0.0116279	0.686047	0.190476	0.0285714	0.0476191	0.733333	0.26328	0.0531178	0.103926	0.579677	0.283581	0.0746269	0.0522387	0.589553	0.212121	0.040404	0.0303031	0.717172
ath-miR840-5p	0.333333	0	0	0.666667	0.5	0	0	0.5	0.5	0	0.5	0	0.375	0	0.25	0.375	0	0	1	0	1	0	0	0
ath-miR841a-3p	0.26	0.02	0.44	0.28	0.5	0	0.319444	0.180556	0.441176	0.0294118	0.411765	0.117647	0.600001	0.00800001	0.335999	0.0560001	0.444444	0	0.444444	0.111111	0.4	0	0.2	0.4
ath-miR841a-5p	0.333333	0.166667	0.388889	0.111111	0.368421	0.210526	0.210526	0.210526	0.375	0	0.625	0	0.526316	0.0105263	0.421053	0.0421053	0.463414	0.097561	0.341464	0.097561	0.580645	0.0322581	0.225807	0.161291
ath-miR841b-3p	0.933962	0	0	0.0660379	0.929293	0	0	0.070707	0.8	0	0.04	0.16	0.887324	0.0140845	0.0563381	0.0422536	0.875	0	0	0.125	1	0	0	0
ath-miR841b-5p	0.428572	0.142857	0.142857	0.285715	0.571429	0.142857	0.142857	0.142857	0.6	0	0.4	0	0.75	0	0.166666	0.0833334	0.250001	0	0.749999	0	0.5	0	0.5	0
ath-miR842	0.800001	0	0	0.199999	0.461538	0	0	0.538462	0.466667	0	0.2	0.333333	0.333333	0.051282	0.153846	0.461538	0.444444	0.111111	0.222222	0.222222	0.363636	0	0	0.636364
ath-miR843	0.909299	0	0.0173542	0.0733464	0.935271	0.000299669	0.0209769	0.0434522	0.83526	0.00867052	0.112717	0.0433525	0.847743	0.00765111	0.0994644	0.0451415	0.768657	0.022388	0.11194	0.0970148	0.695122	0.0487805	0.146341	0.109756
ath-miR844-3p	0	0.25	0.5	0.25	0	0.5	0.5	0	0.75	0.125	0.125	0	0.611111	0.0555556	0.277778	0.0555556	0.454546	0.0454546	0.0909091	0.409091	0.692307	0	0.0769231	0.230769
ath-miR844-5p	#DIV/0!	#DIV/0!	#DIV/0!	#DIV/0!	#DIV/0!	#DIV/0!	#DIV/0!	#DIV/0!	#DIV/0!	#DIV/0!	#DIV/0!	#DIV/0!	1	0	0	0	1	0	0	0	#DIV/0!	#DIV/0!	#DIV/0!	#DIV/0!
ath-miR845a	0.946356	0.000506072	0.00455465	0.0485831	0.942587	0.000402901	0.00322321	0.0537872	0.934498	0	0.0116448	0.0538574	0.947789	0.0014111	0.00893697	0.0418627	0.925082	0.00325732	0.00651464	0.0651464	0.902439	0.00487805	0.0195122	0.0731708
ath-miR845b	0.888889	0	0.111111	0	0.855072	0	0.072464	0.072464	1	0	0	0	0.935484	0	0.0645161	0	0.5	0	0	0.5	1	0	0	0
ath-miR846-3p	0.680106	0.201586	0.0535361	0.064772	0.701117	0.188197	0.0398724	0.0708135	0.819267	0.0255755	0.0809889	0.0741688	0.829306	0.0413038	0.0688396	0.0605506	0.874141	0.0321769	0.0132395	0.0804423	0.862847	0.0331141	0.0140911	0.089948
ath-miR846-5p	0.345865	0.142857	0.285714	0.225564	0.391961	0.110553	0.241206	0.256281	0.207207	0.045045	0.666667	0.0810811	0.371335	0.0358306	0.517915	0.0749185	0.511111	0.133334	0.266667	0.088889	0.539474	0.118421	0.263158	0.0789473
ath-miR847	0.736842	0.0175439	0.22807	0.0175439	0.767442	0	0.186046	0.0465117	0.805556	0	0.0833333	0.111111	0.743903	0.0121951	0.121951	0.121951	0.702128	0.106383	0.148936	0.0425533	0.805556	0	0.0833334	0.111111
ath-miR848	0.40625	0	0.34375	0.25	0.552631	0	0.342106	0.105263	0.547619	0.0119048	0.392857	0.047619	0.510417	0.0208334	0.385417	0.0833334	0.431373	0	0.470588	0.098039	0.482759	0.0344828	0.275862	0.206897
ath-miR849	#DIV/0!	#DIV/0!	#DIV/0!	#DIV/0!	#DIV/0!	#DIV/0!	#DIV/0!	#DIV/0!	#DIV/0!	#DIV/0!	#DIV/0!	#DIV/0!	#DIV/0!	#DIV/0!	#DIV/0!	#DIV/0!	#DIV/0!	#DIV/0!	#DIV/0!	#DIV/0!	#DIV/0!	#DIV/0!	#DIV/0!	#DIV/0!
ath-miR850	0.141647	0.17321	0.253271	0.431871	0.0630443	0.197843	0.184156	0.554956	0.107143	0.0625	0.517857	0.3125	0.109409	0.0503282	0.501094	0.339169	0.0882353	0.245098	0.137255	0.529411	0.0958905	0.369864	0.109589	0.424656
ath-miR851-3p	1	0	0	0	1	0	0	0	#DIV/0!	#DIV/0!	#DIV/0!	#DIV/0!	1	0	0	0	#DIV/0!	#DIV/0!	#DIV/0!	#DIV/0!	#DIV/0!	#DIV/0!	#DIV/0!	#DIV/0!
ath-miR851-5p	0.333333	0	0.666667	0	0	0	0	1	0	0	0.25	0.75	0.25	0	0.25	0.5	0.5	0	0	0.5	0	0	0	1
ath-miR852	#DIV/0!	#DIV/0!	#DIV/0!	#DIV/0!	#DIV/0!	#DIV/0!	#DIV/0!	#DIV/0!	1	0	0	0	0.875	0	0	0.125	1	0	0	0	1	0	0	0
ath-miR853	0.333333	0	0	0.666667	0.3	0.2	0	0.5	0	0.5	0	0.5	0.214286	0.142857	0.0714286	0.571429	0.181818	0.0909091	0	0.727273	0.222222	0.333334	0	0.444444
ath-miR855	#DIV/0!	#DIV/0!	#DIV/0!	#DIV/0!	#DIV/0!	#DIV/0!	#DIV/0!	#DIV/0!	#DIV/0!	#DIV/0!	#DIV/0!	#DIV/0!	#DIV/0!	#DIV/0!	#DIV/0!	#DIV/0!	#DIV/0!	#DIV/0!	#DIV/0!	#DIV/0!	#DIV/0!	#DIV/0!	#DIV/0!	#DIV/0!
ath-miR856	#DIV/0!	#DIV/0!	#DIV/0!	#DIV/0!	#DIV/0!	#DIV/0!	#DIV/0!	#DIV/0!	#DIV/0!	#DIV/0!	#DIV/0!	#DIV/0!	0	0	0	1	#DIV/0!	#DIV/0!	#DIV/0!	#DIV/0!	#DIV/0!	#DIV/0!	#DIV/0!	#DIV/0!
ath-miR857	0.470588	0.0588236	0.215686	0.254902	0.632353	0	0.147058	0.220589	0.426829	0.0365854	0.280488	0.256097	0.487705	0.0409837	0.29918	0.172131	0.521739	0.0434783	0.195652	0.23913	0.625	0.0499999	0.275	0.0499999
ath-miR858a	0.335026	0.269035	0.101523	0.294416	0.420936	0.198218	0.100223	0.280624	0.525168	0.0738255	0.157718	0.243288	0.515363	0.0670392	0.180866	0.236732	0.517545	0.124402	0.0813397	0.276714	0.528917	0.112513	0.0872765	0.271293
ath-miR858b	0.546667	0.0933335	0.24	0.12	0.538461	0.0692307	0.284616	0.107693	0.720183	0.0137615	0.151376	0.114679	0.69163	0.0352423	0.187225	0.085903	0.744318	0.0198864	0.119318	0.116477	0.754153	0.0332225	0.0996679	0.112956
ath-miR859	0.2	0	0.4	0.4	0.5	0	0	0.5	0.2	0	0.4	0.4	0.40625	0.03125	0.5	0.0624999	0.599999	0	0.200001	0.200001	0.5	0	0.5	0
ath-miR860	0.4	0.4	0	0.2	0.631579	0	0.157894	0.210526	0.5	0	0.5	0	0.272727	0.0909091	0.636364	0	0.5	0	0	0.5	0.500001	0	0.333333	0.166666
ath-miR861-3p	#DIV/0!	#DIV/0!	#DIV/0!	#DIV/0!	#DIV/0!	#DIV/0!	#DIV/0!	#DIV/0!	#DIV/0!	#DIV/0!	#DIV/0!	#DIV/0!	#DIV/0!	#DIV/0!	#DIV/0!	#DIV/0!	#DIV/0!	#DIV/0!	#DIV/0!	#DIV/0!	#DIV/0!	#DIV/0!	#DIV/0!	#DIV/0!
ath-miR861-5p	#DIV/0!	#DIV/0!	#DIV/0!	#DIV/0!	#DIV/0!	#DIV/0!	#DIV/0!	#DIV/0!	#DIV/0!	#DIV/0!	#DIV/0!	#DIV/0!	#DIV/0!	#DIV/0!	#DIV/0!	#DIV/0!	#DIV/0!	#DIV/0!	#DIV/0!	#DIV/0!	#DIV/0!	#DIV/0!	#DIV/0!	#DIV/0!
ath-miR862-3p	#DIV/0!	#DIV/0!	#DIV/0!	#DIV/0!	#DIV/0!	#DIV/0!	#DIV/0!	#DIV/0!	#DIV/0!	#DIV/0!	#DIV/0!	#DIV/0!	#DIV/0!	#DIV/0!	#DIV/0!	#DIV/0!	#DIV/0!	#DIV/0!	#DIV/0!	#DIV/0!	#DIV/0!	#DIV/0!	#DIV/0!	#DIV/0!
ath-miR862-5p	0.599999	0.0499999	0.0499999	0.300001	0.774194	0	0.129032	0.0967741	0.769231	0	0.153846	0.0769231	0.827586	0	0.0862071	0.0862071	0.736843	0	0.105263	0.157894	0.916667	0	0	0.0833333
ath-miR863-3p	0.857143	0.142857	0	0	1	0	0	0	0.4	0	0.6	0	0.555556	0	0.333333	0.111111	0.75	0	0.25	0	1	0	0	0
ath-miR863-5p	0.12963	0.314815	0.0185185	0.537037	0.115108	0.381295	0	0.503597	0.6	0.111111	0.111111	0.177778	0.539823	0.079646	0.132743	0.247787	0.761905	0.0476191	0.0238095	0.166666	0.586207	0.0689655	0.0344827	0.310345
ath-miR864-3p	#DIV/0!	#DIV/0!	#DIV/0!	#DIV/0!	#DIV/0!	#DIV/0!	#DIV/0!	#DIV/0!	#DIV/0!	#DIV/0!	#DIV/0!	#DIV/0!	#DIV/0!	#DIV/0!	#DIV/0!	#DIV/0!	#DIV/0!	#DIV/0!	#DIV/0!	#DIV/0!	0	0	1	0
ath-miR864-5p	0	1	0	0	0	0.692307	0.153846	0.153846	0.142857	0.142857	0.428572	0.285714	0.2	0.2	0.266667	0.333333	0.166667	0.333333	0.166667	0.333333	0.2	0.4	0.2	0.2
ath-miR865-3p	#DIV/0!	#DIV/0!	#DIV/0!	#DIV/0!	#DIV/0!	#DIV/0!	#DIV/0!	#DIV/0!	#DIV/0!	#DIV/0!	#DIV/0!	#DIV/0!	#DIV/0!	#DIV/0!	#DIV/0!	#DIV/0!	#DIV/0!	#DIV/0!	#DIV/0!	#DIV/0!	0	0	0	1
ath-miR865-5p	1	0	0	0	#DIV/0!	#DIV/0!	#DIV/0!	#DIV/0!	1	0	0	0	1	0	0	0	#DIV/0!	#DIV/0!	#DIV/0!	#DIV/0!	1	0	0	0
ath-miR866-3p	0.5	0	0	0.5	1	0	0	0	#DIV/0!	#DIV/0!	#DIV/0!	#DIV/0!	0	0	1	0	#DIV/0!	#DIV/0!	#DIV/0!	#DIV/0!	#DIV/0!	#DIV/0!	#DIV/0!	#DIV/0!
ath-miR866-5p	0	0	0	1	0	0	0.333334	0.666666	0	0	0.2	0.8	0.133333	0	0.333333	0.533333	0.142857	0	0.571429	0.285714	0	0	0.5	0.5
ath-miR868-3p	#DIV/0!	#DIV/0!	#DIV/0!	#DIV/0!	#DIV/0!	#DIV/0!	#DIV/0!	#DIV/0!	#DIV/0!	#DIV/0!	#DIV/0!	#DIV/0!	#DIV/0!	#DIV/0!	#DIV/0!	#DIV/0!	#DIV/0!	#DIV/0!	#DIV/0!	#DIV/0!	#DIV/0!	#DIV/0!	#DIV/0!	#DIV/0!
ath-miR868-5p	0	1	0	0	0	1	0	0	#DIV/0!	#DIV/0!	#DIV/0!	#DIV/0!	0.5	0	0.5	0	0.666667	0.333333	0	0	0.5	0	0.5	0
ath-miR869.1	#DIV/0!	#DIV/0!	#DIV/0!	#DIV/0!	#DIV/0!	#DIV/0!	#DIV/0!	#DIV/0!	1	0	0	0	#DIV/0!	#DIV/0!	#DIV/0!	#DIV/0!	0	1	0	0	#DIV/0!	#DIV/0!	#DIV/0!	#DIV/0!
ath-miR869.2	0.0667721	0.0035559	0.887001	0.0426709	0.0848503	0.00617093	0.867942	0.0410366	0.472441	0.00787401	0.448819	0.0708661	0.396285	0.0108359	0.547988	0.0448915	0.689655	0.0344828	0.189655	0.0862067	0.804878	0.0243903	0.121952	0.0487806
ath-miR870-3p	1	0	0	0	1	0	0	0	0.8	0	0.2	0	1	0	0	0	#DIV/0!	#DIV/0!	#DIV/0!	#DIV/0!	1	0	0	0
ath-miR870-5p	0	0	1	0	#DIV/0!	#DIV/0!	#DIV/0!	#DIV/0!	#DIV/0!	#DIV/0!	#DIV/0!	#DIV/0!	#DIV/0!	#DIV/0!	#DIV/0!	#DIV/0!	#DIV/0!	#DIV/0!	#DIV/0!	#DIV/0!	#DIV/0!	#DIV/0!	#DIV/0!	#DIV/0!
miR156ij	0.436363	0	0.254545	0.309091	0.412698	0	0.174603	0.412698	0.117647	0	0.352941	0.529412	0.325842	0	0.494382	0.179775	0.238095	0	0.47619	0.285715	0.363636	0	0.363636	0.272728
miR159a-c	0.681807	0.033296	0.14239	0.142507	0.718388	0.0343557	0.126836	0.120421	0.603853	0.016459	0.247833	0.131855	0.627199	0.0166606	0.243995	0.112146	0.550713	0.0249677	0.26925	0.15507	0.555126	0.0238562	0.253984	0.167034
miR167abd	0.531619	0.00248698	0.314662	0.151232	0.548478	0.00173997	0.312131	0.137651	0.43717	0.0146725	0.418223	0.129934	0.33328	0.0171822	0.523826	0.125712	0.301594	0.0377647	0.486352	0.174289	0.297047	0.0351175	0.486222	0.181614
miR169a-c	0	0	0.142857	0.857143	0	0	0.333333	0.666667	0.125	0.0625	0.0625	0.75	0.111111	0.0555556	0.333333	0.5	0.333333	0.0666668	0.133334	0.466667	0.2	0.1	0.5	0.2
miR172a-d	0.421052	0.368422	0	0.210526	0.52381	0.261904	0.0238095	0.190476	0.648438	0.109375	0.0234375	0.21875	0.676	0.096	0.0560001	0.172	0.601942	0.135922	0.0436893	0.218446	0.561111	0.122222	0.0666667	0.25
miR319a-c	0.0742715	0.0779591	0.0246503	0.823119	0.0593668	0.0777587	0.0116251	0.851249	0.137703	0.102648	0.0729699	0.686679	0.13591	0.0983647	0.0690438	0.696681	0.259268	0.15183	0.0407713	0.548131	0.252825	0.15041	0.0401162	0.55665
miR395a-f	0.902472	0.00575738	0.00689893	0.0848718	0.888766	0.00639401	0.0103572	0.0944832	0.84962	0.0093671	0.0222785	0.118734	0.889821	0.0100441	0.0204557	0.0796791	0.831386	0.0208681	0.033389	0.114357	0.826467	0.0137328	0.0337078	0.126092
miR396ab	0.635199	0.00463445	0.179307	0.18086	0.647742	0.00445719	0.162178	0.185623	0.67405	0.00880033	0.137994	0.179156	0.697185	0.00803784	0.141081	0.153696	0.638682	0.0183566	0.114987	0.227974	0.620358	0.0184073	0.119742	0.241493
miR398a-c	0.874398	0.00022593	0.00487223	0.120504	0.871617	0.000169871	0.00332311	0.12489	0.839291	0.000771772	0.00982803	0.15011	0.873481	0.00047495	0.00957206	0.116472	0.823092	0.00155453	0.0106911	0.164663	0.810078	0.00188315	0.00862028	0.179419
miR399a-f	0.936073	0	0.0091324	0.0547945	0.874715	0.00455581	0.0113895	0.109339	0.855556	0.0148148	0.0111111	0.118519	0.875654	0.00785341	0.0248691	0.091623	0.757862	0.0283019	0.0345912	0.179245	0.772487	0.015873	0.058201	0.153439

## Sheet: AGO1 IP-Ratio-FL
S4 Data. Composition of miRNA forms in AGO1 and AGO10 IP treated with SDN1 and SDN1 catalytic mutant (SDN1-D283A).
	AGO1 IP (Mock)				AGO1 IP (SDN1)				AGO1 IP (SDN1-D283A)
miRNAs	br1	br2	Mean	Stdev	br1	br2	Mean	Stdev	br1	br2	Mean	Stdev
ath-miR156a-3p	0	0.5	0.25	0.353553	0.75	1	0.875	0.176777	0.749999	#DIV/0!	#DIV/0!	#DIV/0!
ath-miR156a-5p	0.577071	0.59496	0.586016	0.0126499	0.46648	0.483505	0.474992	0.0120389	0.428628	0.435851	0.432239	0.00510748
ath-miR156b-3p	0.0732492	0.0607213	0.0669852	0.00885854	0.499527	0.436913	0.46822	0.0442746	0.622097	0.627246	0.624672	0.00364109
ath-miR156b-5p	0.577071	0.59496	0.586016	0.0126499	0.46648	0.483505	0.474992	0.0120389	0.428628	0.435851	0.432239	0.00510748
ath-miR156c-3p	0	1	0.5	0.707107	#DIV/0!	0.75	#DIV/0!	#DIV/0!	1	1	1	0
ath-miR156c-5p	0.577071	0.59496	0.586016	0.0126499	0.46648	0.483505	0.474992	0.0120389	0.428628	0.435851	0.432239	0.00510748
ath-miR156d-3p	#DIV/0!	#DIV/0!	#DIV/0!	#DIV/0!	#DIV/0!	#DIV/0!	#DIV/0!	#DIV/0!	#DIV/0!	#DIV/0!	#DIV/0!	#DIV/0!
ath-miR156d-5p	0.577071	0.59496	0.586016	0.0126499	0.46648	0.483505	0.474992	0.0120389	0.428628	0.435851	0.432239	0.00510748
ath-miR156e	0.577071	0.59496	0.586016	0.0126499	0.46648	0.483505	0.474992	0.0120389	0.428628	0.435851	0.432239	0.00510748
ath-miR156f-3p	#DIV/0!	#DIV/0!	#DIV/0!	#DIV/0!	#DIV/0!	#DIV/0!	#DIV/0!	#DIV/0!	#DIV/0!	#DIV/0!	#DIV/0!	#DIV/0!
ath-miR156f-5p	0.577071	0.59496	0.586016	0.0126499	0.46648	0.483505	0.474992	0.0120389	0.428628	0.435851	0.432239	0.00510748
ath-miR156g	0.558283	0.549784	0.554033	0.00600962	0.382353	0.485075	0.433714	0.0726353	0.447368	0.314286	0.380827	0.0941036
ath-miR156h	0	0	0	0	0.5	0.166667	0.333333	0.235702	0.2	0	0.1	0.141421
ath-miR156i	0	0	0	0	0	0.0227273	0.0113637	0.0160707	0	0	0	0
ath-miR156j	0.5	0.490566	0.495283	0.0066708	0.133333	0.363637	0.248485	0.162849	0.238095	0.363636	0.300865	0.0887711
ath-miR157a-3p	0.571428	0.736842	0.654135	0.116966	0.916667	0.833333	0.875	0.0589256	0.25	1	0.625	0.53033
ath-miR157a-5p	0.189907	0.187823	0.188865	0.00147351	0.196941	0.200868	0.198905	0.00277637	0.221075	0.241165	0.23112	0.0142057
ath-miR157b-3p	0.571428	0.736842	0.654135	0.116966	0.916667	0.833333	0.875	0.0589256	0.25	1	0.625	0.53033
ath-miR157b-5p	0.189907	0.187823	0.188865	0.00147351	0.196941	0.200868	0.198905	0.00277637	0.221075	0.241165	0.23112	0.0142057
ath-miR157c-3p	0.503448	0.451613	0.477531	0.036653	0.416667	0.466216	0.441441	0.0350367	0.322581	0.368421	0.345501	0.0324139
ath-miR157c-5p	0.189907	0.187823	0.188865	0.00147351	0.196941	0.200868	0.198905	0.00277637	0.221075	0.241165	0.23112	0.0142057
ath-miR157d	0.104167	0.0988236	0.101495	0.00377815	0.0875575	0.0943059	0.0909317	0.00477182	0.109091	0.10241	0.10575	0.00472428
ath-miR158a-3p	0.258122	0.274261	0.266191	0.0114117	0.24719	0.270289	0.258739	0.0163334	0.316818	0.327794	0.322306	0.00776138
ath-miR158a-5p	0.765152	0.799435	0.782293	0.024242	0.859649	0.857143	0.858396	0.00177233	0.766667	0.652174	0.70942	0.0809586
ath-miR158b	0.229826	0.285714	0.25777	0.0395191	0.225291	0.277379	0.251335	0.0368322	0.354581	0.357505	0.356043	0.00206759
ath-miR159a	0.658671	0.700489	0.67958	0.0295702	0.527187	0.553977	0.540582	0.0189433	0.511071	0.528897	0.519984	0.0126053
ath-miR159b-3p	0.574658	0.611645	0.593152	0.0261538	0.48554	0.487926	0.486733	0.00168752	0.40284	0.404381	0.40361	0.00108999
ath-miR159b-5p	0.75	1	0.875	0.176777	0.833333	0.916667	0.875	0.0589256	1	0.857143	0.928571	0.101015
ath-miR159c	0.00836287	0.00997825	0.00917056	0.00114225	0.0097226	0.00630826	0.00801543	0.0024143	0.0122498	0.0170636	0.0146567	0.00340385
ath-miR160a-3p	#DIV/0!	#DIV/0!	#DIV/0!	#DIV/0!	1	#DIV/0!	#DIV/0!	#DIV/0!	#DIV/0!	#DIV/0!	#DIV/0!	#DIV/0!
ath-miR160a-5p	0.160047	0.213793	0.18692	0.0380044	0.251348	0.331648	0.291498	0.0567802	0.437878	0.47497	0.456424	0.0262281
ath-miR160b	0.160047	0.213793	0.18692	0.0380044	0.251348	0.331648	0.291498	0.0567802	0.437878	0.47497	0.456424	0.0262281
ath-miR160c-3p	#DIV/0!	1	#DIV/0!	#DIV/0!	0.5	0.4	0.45	0.0707108	#DIV/0!	0	#DIV/0!	#DIV/0!
ath-miR160c-5p	0.160047	0.213793	0.18692	0.0380044	0.251348	0.331648	0.291498	0.0567802	0.437878	0.47497	0.456424	0.0262281
ath-miR161.1	0.85612	0.888361	0.87224	0.0227982	0.848038	0.875273	0.861656	0.0192586	0.811033	0.787521	0.799277	0.0166252
ath-miR161.2	0.0671938	0.0891365	0.0781651	0.0155159	0.128205	0.165339	0.146772	0.0262574	0.142307	0.184357	0.163332	0.0297338
ath-miR162a-3p	0.80739	0.757336	0.782363	0.0353939	0.655028	0.688548	0.671788	0.0237018	0.613625	0.603157	0.608391	0.00740203
ath-miR162a-5p	0.905967	0.901216	0.903592	0.00335967	0.916667	0.904982	0.910824	0.00826264	0.854701	0.886792	0.870747	0.0226921
ath-miR162b-3p	0.80739	0.757336	0.782363	0.0353939	0.655028	0.688548	0.671788	0.0237018	0.613625	0.603157	0.608391	0.00740203
ath-miR162b-5p	0.905967	0.901216	0.903592	0.00335967	0.916667	0.904982	0.910824	0.00826264	0.854701	0.886792	0.870747	0.0226921
ath-miR163	0.514364	0.53237	0.523367	0.0127323	0.448309	0.446001	0.447155	0.00163211	0.630736	0.649953	0.640344	0.0135883
ath-miR164a	0.532617	0.544555	0.538586	0.00844147	0.60991	0.594763	0.602337	0.0107106	0.680292	0.695868	0.68808	0.0110141
ath-miR164b-3p	1	0.928572	0.964286	0.0505074	0.916667	0.707317	0.811992	0.148033	0.787878	0.870968	0.829423	0.0587533
ath-miR164b-5p	0.532617	0.544555	0.538586	0.00844147	0.60991	0.594763	0.602337	0.0107106	0.680292	0.695868	0.68808	0.0110141
ath-miR164c-3p	0.923077	0.545454	0.734265	0.26702	1	0.9	0.95	0.0707107	0.4	0.666667	0.533333	0.188562
ath-miR164c-5p	0.223684	0.185047	0.204366	0.0273206	0.147314	0.140369	0.143841	0.00491073	0.189977	0.225352	0.207665	0.0250143
ath-miR165a-3p	0.604767	0.638472	0.62162	0.023833	0.632076	0.675384	0.65373	0.0306234	0.665339	0.665038	0.665189	0.000212723
ath-miR165a-5p	0.833334	#DIV/0!	#DIV/0!	#DIV/0!	0	1	0.5	0.707107	#DIV/0!	#DIV/0!	#DIV/0!	#DIV/0!
ath-miR165b	0.604767	0.638472	0.62162	0.023833	0.632076	0.675384	0.65373	0.0306234	0.665339	0.665038	0.665189	0.000212723
ath-miR166a-3p	0.702927	0.723979	0.713453	0.0148863	0.665574	0.707253	0.686414	0.0294716	0.727715	0.727617	0.727666	6.96851e-05
ath-miR166a-5p	#DIV/0!	0.5	#DIV/0!	#DIV/0!	0	0.333333	0.166667	0.235702	#DIV/0!	1	#DIV/0!	#DIV/0!
ath-miR166b-3p	0.702927	0.723979	0.713453	0.0148863	0.665574	0.707253	0.686414	0.0294716	0.727715	0.727617	0.727666	6.96851e-05
ath-miR166b-5p	#DIV/0!	0.5	#DIV/0!	#DIV/0!	0	0.333333	0.166667	0.235702	#DIV/0!	1	#DIV/0!	#DIV/0!
ath-miR166c	0.702927	0.723979	0.713453	0.0148863	0.665574	0.707253	0.686414	0.0294716	0.727715	0.727617	0.727666	6.96851e-05
ath-miR166d	0.702927	0.723979	0.713453	0.0148863	0.665574	0.707253	0.686414	0.0294716	0.727715	0.727617	0.727666	6.96851e-05
ath-miR166e-3p	0.702927	0.723979	0.713453	0.0148863	0.665574	0.707253	0.686414	0.0294716	0.727715	0.727617	0.727666	6.96851e-05
ath-miR166e-5p	#DIV/0!	#DIV/0!	#DIV/0!	#DIV/0!	#DIV/0!	#DIV/0!	#DIV/0!	#DIV/0!	#DIV/0!	#DIV/0!	#DIV/0!	#DIV/0!
ath-miR166f	0.702927	0.723979	0.713453	0.0148863	0.665574	0.707253	0.686414	0.0294716	0.727715	0.727617	0.727666	6.96851e-05
ath-miR166g	0.702927	0.723979	0.713453	0.0148863	0.665574	0.707253	0.686414	0.0294716	0.727715	0.727617	0.727666	6.96851e-05
ath-miR167a-3p	#DIV/0!	#DIV/0!	#DIV/0!	#DIV/0!	1	0.6	0.8	0.282843	1	1	1	0
ath-miR167a-5p	0.575909	0.588677	0.582293	0.00902817	0.465209	0.35154	0.408374	0.0803761	0.320827	0.315293	0.31806	0.00391336
ath-miR167b	0.575909	0.588677	0.582293	0.00902817	0.465209	0.35154	0.408374	0.0803761	0.320827	0.315293	0.31806	0.00391336
ath-miR167c-3p	0.880025	0.860409	0.870217	0.0138704	0.666041	0.743548	0.704795	0.0548057	0.76569	0.792	0.778845	0.018604
ath-miR167c-5p	0.188679	0.298507	0.243593	0.0776604	0.3875	0.233438	0.310469	0.108938	0.357144	0.382978	0.370061	0.0182677
ath-miR167d	0.0695458	0.0444659	0.0570058	0.0177342	0.0193014	0.0143709	0.0168361	0.00348642	0.025183	0.0288853	0.0270341	0.00261789
ath-miR168a-3p	0.786127	0.798122	0.792125	0.00848177	1	0.65	0.825	0.247488	0.8	0.785714	0.792857	0.0101014
ath-miR168a-5p	0.689147	0.72167	0.705409	0.0229967	0.615246	0.63905	0.627148	0.0168322	0.589989	0.599491	0.59474	0.00671951
ath-miR168b-3p	0.916667	1	0.958333	0.0589255	#DIV/0!	1	#DIV/0!	#DIV/0!	0.333333	#DIV/0!	#DIV/0!	#DIV/0!
ath-miR168b-5p	0.689147	0.72167	0.705409	0.0229967	0.615246	0.63905	0.627148	0.0168322	0.589989	0.599491	0.59474	0.00671951
ath-miR169a-3p	#DIV/0!	#DIV/0!	#DIV/0!	#DIV/0!	#DIV/0!	#DIV/0!	#DIV/0!	#DIV/0!	#DIV/0!	#DIV/0!	#DIV/0!	#DIV/0!
ath-miR169a-5p	0	0	0	0	0.2	0.153846	0.176923	0.0326357	0.454545	0.222222	0.338384	0.164277
ath-miR169b-3p	#DIV/0!	#DIV/0!	#DIV/0!	#DIV/0!	#DIV/0!	#DIV/0!	#DIV/0!	#DIV/0!	#DIV/0!	#DIV/0!	#DIV/0!	#DIV/0!
ath-miR169b-5p	0	0	0	0	0	0	0	0	0	0	0	0
ath-miR169c	0	0	0	0	0	0	0	0	0	0	0	0
ath-miR169d	#DIV/0!	0	#DIV/0!	#DIV/0!	#DIV/0!	#DIV/0!	#DIV/0!	#DIV/0!	0	#DIV/0!	#DIV/0!	#DIV/0!
ath-miR169e	#DIV/0!	0	#DIV/0!	#DIV/0!	#DIV/0!	#DIV/0!	#DIV/0!	#DIV/0!	0	#DIV/0!	#DIV/0!	#DIV/0!
ath-miR169f-3p	1	#DIV/0!	#DIV/0!	#DIV/0!	#DIV/0!	#DIV/0!	#DIV/0!	#DIV/0!	1	#DIV/0!	#DIV/0!	#DIV/0!
ath-miR169f-5p	#DIV/0!	0	#DIV/0!	#DIV/0!	#DIV/0!	#DIV/0!	#DIV/0!	#DIV/0!	0	#DIV/0!	#DIV/0!	#DIV/0!
ath-miR169g-3p	#DIV/0!	#DIV/0!	#DIV/0!	#DIV/0!	#DIV/0!	#DIV/0!	#DIV/0!	#DIV/0!	#DIV/0!	#DIV/0!	#DIV/0!	#DIV/0!
ath-miR169g-5p	#DIV/0!	0	#DIV/0!	#DIV/0!	#DIV/0!	#DIV/0!	#DIV/0!	#DIV/0!	0	#DIV/0!	#DIV/0!	#DIV/0!
ath-miR169h	0	0.0999998	0.0499999	0.0707105	0	0	0	0	0.272726	0	0.136363	0.192847
ath-miR169i	0	0.0999998	0.0499999	0.0707105	0	0	0	0	0.272726	0	0.136363	0.192847
ath-miR169j	0	0.0999998	0.0499999	0.0707105	0	0	0	0	0.272726	0	0.136363	0.192847
ath-miR169k	0	0.0999998	0.0499999	0.0707105	0	0	0	0	0.272726	0	0.136363	0.192847
ath-miR169l	0	0.0999998	0.0499999	0.0707105	0	0	0	0	0.272726	0	0.136363	0.192847
ath-miR169m	0	0.0999998	0.0499999	0.0707105	0	0	0	0	0.272726	0	0.136363	0.192847
ath-miR169n	0	0.0999998	0.0499999	0.0707105	0	0	0	0	0.272726	0	0.136363	0.192847
ath-miR170-3p	#DIV/0!	0.666667	#DIV/0!	#DIV/0!	0.375	0.44	0.4075	0.0459619	0.749999	0.738094	0.744047	0.00841811
ath-miR170-5p	0.425867	0.49125	0.458559	0.0462325	0.573433	0.609709	0.591571	0.0256509	0.642015	0.598214	0.620114	0.0309718
ath-miR171a-3p	0.592593	0.552632	0.572613	0.0282566	0.461883	0.478807	0.470345	0.0119667	0.612244	0.666666	0.639455	0.0384822
ath-miR171a-5p	0.425867	0.49125	0.458559	0.0462325	0.573433	0.609709	0.591571	0.0256509	0.642015	0.598214	0.620114	0.0309718
ath-miR171b-3p	0.611702	0.655503	0.633602	0.0309718	0.319445	0.335106	0.327276	0.0110747	0.276423	0.30131	0.288867	0.017598
ath-miR171b-5p	1	1	1	0	1	0.923077	0.961538	0.0543928	#DIV/0!	#DIV/0!	#DIV/0!	#DIV/0!
ath-miR171c-3p	0.611702	0.655503	0.633602	0.0309718	0.319445	0.335106	0.327276	0.0110747	0.276423	0.30131	0.288867	0.017598
ath-miR171c-5p	1	1	1	0	0.333334	0.333333	0.333333	2.95851e-07	#DIV/0!	#DIV/0!	#DIV/0!	#DIV/0!
ath-miR172a	0.470587	0.567568	0.519078	0.0685759	0.711712	0.726457	0.719085	0.0104266	0.67033	0.632911	0.651621	0.0264591
ath-miR172b-3p	0.470587	0.567568	0.519078	0.0685759	0.711712	0.726457	0.719085	0.0104266	0.67033	0.632911	0.651621	0.0264591
ath-miR172b-5p	#DIV/0!	#DIV/0!	#DIV/0!	#DIV/0!	#DIV/0!	#DIV/0!	#DIV/0!	#DIV/0!	#DIV/0!	#DIV/0!	#DIV/0!	#DIV/0!
ath-miR172c	0	0.166667	0.0833333	0.117851	0.2	0.170732	0.185366	0.0206959	0.0606061	0.0294118	0.0450089	0.0220577
ath-miR172d-3p	0	0.166667	0.0833333	0.117851	0.2	0.170732	0.185366	0.0206959	0.0606061	0.0294118	0.0450089	0.0220577
ath-miR172d-5p	#DIV/0!	#DIV/0!	#DIV/0!	#DIV/0!	#DIV/0!	#DIV/0!	#DIV/0!	#DIV/0!	#DIV/0!	#DIV/0!	#DIV/0!	#DIV/0!
ath-miR172e-3p	#DIV/0!	1	#DIV/0!	#DIV/0!	0.333333	0.75	0.541667	0.294628	0.75	0.666667	0.708333	0.0589256
ath-miR172e-5p	#DIV/0!	#DIV/0!	#DIV/0!	#DIV/0!	#DIV/0!	#DIV/0!	#DIV/0!	#DIV/0!	#DIV/0!	#DIV/0!	#DIV/0!	#DIV/0!
ath-miR173-3p	0.0149254	0.0243902	0.0196578	0.00669264	0.05	0.0327869	0.0413935	0.0121715	0	0.0666666	0.0333333	0.0471404
ath-miR173-5p	0.635135	0.711621	0.673378	0.0540834	0.643982	0.618967	0.631475	0.017688	0.611423	0.616393	0.613908	0.00351478
ath-miR1886.1	0.6	1	0.8	0.282842	#DIV/0!	0.785714	#DIV/0!	#DIV/0!	1	1	1	0
ath-miR1886.2	0.76	0.792453	0.776226	0.0229481	0.677419	0.651377	0.664398	0.0184149	0.758242	0.696428	0.727335	0.0437085
ath-miR1886.3	#DIV/0!	#DIV/0!	#DIV/0!	#DIV/0!	#DIV/0!	#DIV/0!	#DIV/0!	#DIV/0!	#DIV/0!	#DIV/0!	#DIV/0!	#DIV/0!
ath-miR1888a	0.241936	0.288461	0.265198	0.0328985	0.472973	0.473029	0.473001	3.97707e-05	0.571429	0.590164	0.580796	0.0132476
ath-miR1888b	0	0.153846	0.0769232	0.108786	#DIV/0!	0.375	#DIV/0!	#DIV/0!	0.5	1	0.75	0.353553
ath-miR2111a-3p	#DIV/0!	#DIV/0!	#DIV/0!	#DIV/0!	#DIV/0!	#DIV/0!	#DIV/0!	#DIV/0!	1	#DIV/0!	#DIV/0!	#DIV/0!
ath-miR2111a-5p	#DIV/0!	#DIV/0!	#DIV/0!	#DIV/0!	0	0	0	0	0	1	0.5	0.707107
ath-miR2111b-3p	#DIV/0!	#DIV/0!	#DIV/0!	#DIV/0!	#DIV/0!	1	#DIV/0!	#DIV/0!	1	#DIV/0!	#DIV/0!	#DIV/0!
ath-miR2111b-5p	#DIV/0!	#DIV/0!	#DIV/0!	#DIV/0!	0	0	0	0	0	1	0.5	0.707107
ath-miR2112-3p	0	1	0.5	0.707107	0	0.333333	0.166667	0.235702	1	0.428572	0.714286	0.404061
ath-miR2112-5p	#DIV/0!	#DIV/0!	#DIV/0!	#DIV/0!	#DIV/0!	#DIV/0!	#DIV/0!	#DIV/0!	#DIV/0!	#DIV/0!	#DIV/0!	#DIV/0!
ath-miR2933a	#DIV/0!	#DIV/0!	#DIV/0!	#DIV/0!	#DIV/0!	#DIV/0!	#DIV/0!	#DIV/0!	#DIV/0!	#DIV/0!	#DIV/0!	#DIV/0!
ath-miR2933b	#DIV/0!	#DIV/0!	#DIV/0!	#DIV/0!	#DIV/0!	#DIV/0!	#DIV/0!	#DIV/0!	#DIV/0!	#DIV/0!	#DIV/0!	#DIV/0!
ath-miR2934-3p	#DIV/0!	#DIV/0!	#DIV/0!	#DIV/0!	#DIV/0!	1	#DIV/0!	#DIV/0!	#DIV/0!	#DIV/0!	#DIV/0!	#DIV/0!
ath-miR2934-5p	1	0.5	0.75	0.353553	1	1	1	0	1	1	1	0
ath-miR2936	#DIV/0!	#DIV/0!	#DIV/0!	#DIV/0!	0	#DIV/0!	#DIV/0!	#DIV/0!	#DIV/0!	#DIV/0!	#DIV/0!	#DIV/0!
ath-miR2939	#DIV/0!	#DIV/0!	#DIV/0!	#DIV/0!	#DIV/0!	#DIV/0!	#DIV/0!	#DIV/0!	#DIV/0!	#DIV/0!	#DIV/0!	#DIV/0!
ath-miR319a	0.257563	0.268347	0.262955	0.0076254	0.310582	0.318416	0.314499	0.00553963	0.434386	0.423665	0.429026	0.00758102
ath-miR319b	0.257563	0.268347	0.262955	0.0076254	0.310582	0.318416	0.314499	0.00553963	0.434386	0.423665	0.429026	0.00758102
ath-miR319c	0.0138015	0.00654443	0.010173	0.00513151	0.0352859	0.0270455	0.0311657	0.00582682	0.0621433	0.0600474	0.0610954	0.00148202
ath-miR3434-3p	#DIV/0!	#DIV/0!	#DIV/0!	#DIV/0!	#DIV/0!	#DIV/0!	#DIV/0!	#DIV/0!	#DIV/0!	#DIV/0!	#DIV/0!	#DIV/0!
ath-miR3434-5p	#DIV/0!	#DIV/0!	#DIV/0!	#DIV/0!	#DIV/0!	#DIV/0!	#DIV/0!	#DIV/0!	#DIV/0!	#DIV/0!	#DIV/0!	#DIV/0!
ath-miR3440b-3p	0.666667	0.903226	0.784946	0.167273	0.714286	0.809524	0.761905	0.0673434	0.4	0.666667	0.533333	0.188562
ath-miR3440b-5p	#DIV/0!	1	#DIV/0!	#DIV/0!	0.8	0.916667	0.858333	0.0824958	0.833333	1	0.916666	0.117851
ath-miR390a-3p	0.622727	0.630842	0.626784	0.00573793	0.5	0.578947	0.539473	0.0558241	0.642857	0.285714	0.464286	0.252539
ath-miR390a-5p	0.814815	0.714286	0.76455	0.0710846	0.652632	0.739286	0.695959	0.0612738	0.738462	0.75	0.744231	0.00815859
ath-miR390b-3p	0	0.125	0.0625001	0.0883885	0	0	0	0	0	0	0	0
ath-miR390b-5p	0.814815	0.714286	0.76455	0.0710846	0.652632	0.739286	0.695959	0.0612738	0.738462	0.75	0.744231	0.00815859
ath-miR391-3p	#DIV/0!	#DIV/0!	#DIV/0!	#DIV/0!	#DIV/0!	0	#DIV/0!	#DIV/0!	#DIV/0!	#DIV/0!	#DIV/0!	#DIV/0!
ath-miR391-5p	0.633333	0.623655	0.628494	0.00684348	0.675214	0.736017	0.705615	0.0429947	0.777778	0.741804	0.759791	0.0254374
ath-miR3932a	#DIV/0!	#DIV/0!	#DIV/0!	#DIV/0!	#DIV/0!	#DIV/0!	#DIV/0!	#DIV/0!	#DIV/0!	#DIV/0!	#DIV/0!	#DIV/0!
ath-miR3932b-3p	#DIV/0!	#DIV/0!	#DIV/0!	#DIV/0!	#DIV/0!	#DIV/0!	#DIV/0!	#DIV/0!	#DIV/0!	#DIV/0!	#DIV/0!	#DIV/0!
ath-miR3932b-5p	0.880374	0.866008	0.873191	0.0101586	0.831387	0.867326	0.849356	0.0254126	0.80258	0.784219	0.793399	0.012983
ath-miR3933	#DIV/0!	#DIV/0!	#DIV/0!	#DIV/0!	#DIV/0!	#DIV/0!	#DIV/0!	#DIV/0!	#DIV/0!	#DIV/0!	#DIV/0!	#DIV/0!
ath-miR393a-3p	1	0.857143	0.928571	0.101015	1	0.666667	0.833333	0.235702	1	1	1	0
ath-miR393a-5p	0.109215	0.0826772	0.0959461	0.0187651	0.102041	0.0925926	0.0973167	0.00668095	0.0264318	0.0287357	0.0275837	0.00162912
ath-miR393b-3p	0.845494	0.861004	0.853249	0.0109676	0.766234	0.849162	0.807698	0.0586391	0.75188	0.777778	0.764829	0.0183126
ath-miR393b-5p	0.109215	0.0826772	0.0959461	0.0187651	0.102041	0.0925926	0.0973167	0.00668095	0.0264318	0.0287357	0.0275837	0.00162912
ath-miR394a	0.748917	0.759313	0.754115	0.0073507	0.813569	0.842183	0.827876	0.0202332	0.775293	0.779525	0.777409	0.00299223
ath-miR394b-3p	#DIV/0!	#DIV/0!	#DIV/0!	#DIV/0!	#DIV/0!	#DIV/0!	#DIV/0!	#DIV/0!	#DIV/0!	#DIV/0!	#DIV/0!	#DIV/0!
ath-miR394b-5p	0.748917	0.759313	0.754115	0.0073507	0.813569	0.842183	0.827876	0.0202332	0.775293	0.779525	0.777409	0.00299223
ath-miR395a	0.899453	0.881686	0.890569	0.0125636	0.860117	0.897227	0.878672	0.0262406	0.858866	0.832747	0.845806	0.0184693
ath-miR395b	0.900601	0.88693	0.893766	0.0096672	0.830557	0.874096	0.852326	0.0307867	0.743456	0.794118	0.768787	0.0358235
ath-miR395c	0.900601	0.88693	0.893766	0.0096672	0.830557	0.874096	0.852326	0.0307867	0.743456	0.794118	0.768787	0.0358235
ath-miR395d	0.899453	0.881686	0.890569	0.0125636	0.860117	0.897227	0.878672	0.0262406	0.858866	0.832747	0.845806	0.0184693
ath-miR395e	0.899453	0.881686	0.890569	0.0125636	0.860117	0.897227	0.878672	0.0262406	0.858866	0.832747	0.845806	0.0184693
ath-miR395f	0.900601	0.88693	0.893766	0.0096672	0.830557	0.874096	0.852326	0.0307867	0.743456	0.794118	0.768787	0.0358235
ath-miR396a-3p	0.788177	0.750783	0.76948	0.0264416	0.605568	0.600208	0.602888	0.00379025	0.603174	0.628788	0.615981	0.0181118
ath-miR396a-5p	0.0592278	0.0311392	0.0451835	0.0198617	0.0704982	0.0589079	0.0647031	0.00819559	0.110179	0.126253	0.118216	0.0113662
ath-miR396b-3p	0.759109	0.763974	0.761542	0.00344016	0.681034	0.684825	0.68293	0.00268039	0.686696	0.669231	0.677963	0.0123497
ath-miR396b-5p	0.68311	0.70131	0.69221	0.0128694	0.730591	0.746546	0.738569	0.0112824	0.703267	0.685484	0.694375	0.0125746
ath-miR397a	0.104167	0	0.0520835	0.0736571	0.0142857	0.0433214	0.0288035	0.0205313	0.122807	0.173469	0.148138	0.0358238
ath-miR397b	0.583334	0.565217	0.574275	0.0128102	0.407407	0.474999	0.441203	0.0477947	0.486726	0.438775	0.462751	0.0339062
ath-miR398a-3p	0.0764092	0.0702209	0.073315	0.00437585	0.102142	0.0862361	0.0941892	0.0112474	0.0880504	0.0951248	0.0915876	0.00500241
ath-miR398a-5p	#DIV/0!	#DIV/0!	#DIV/0!	#DIV/0!	#DIV/0!	#DIV/0!	#DIV/0!	#DIV/0!	#DIV/0!	#DIV/0!	#DIV/0!	#DIV/0!
ath-miR398b-3p	0.93012	0.929352	0.929736	0.000542572	0.906442	0.927022	0.916732	0.0145528	0.896449	0.889137	0.892793	0.00516969
ath-miR398b-5p	#DIV/0!	#DIV/0!	#DIV/0!	#DIV/0!	1	1	1	0	1	#DIV/0!	#DIV/0!	#DIV/0!
ath-miR398c-3p	0.93012	0.929352	0.929736	0.000542572	0.906442	0.927022	0.916732	0.0145528	0.896449	0.889137	0.892793	0.00516969
ath-miR398c-5p	#DIV/0!	#DIV/0!	#DIV/0!	#DIV/0!	1	1	1	0	1	#DIV/0!	#DIV/0!	#DIV/0!
ath-miR399a	1	0.333333	0.666667	0.471405	0.8	0.84	0.82	0.0282842	0.555555	0.571429	0.563492	0.0112244
ath-miR399b	0.938967	0.882488	0.910728	0.0399365	0.856061	0.883333	0.869697	0.0192847	0.777397	0.792683	0.78504	0.0108084
ath-miR399c-3p	0.938967	0.882488	0.910728	0.0399365	0.856061	0.883333	0.869697	0.0192847	0.777397	0.792683	0.78504	0.0108084
ath-miR399c-5p	#DIV/0!	#DIV/0!	#DIV/0!	#DIV/0!	#DIV/0!	#DIV/0!	#DIV/0!	#DIV/0!	#DIV/0!	#DIV/0!	#DIV/0!	#DIV/0!
ath-miR399d	1	0	0.5	0.707107	#DIV/0!	0.571429	#DIV/0!	#DIV/0!	0.428571	0.538461	0.483516	0.0777042
ath-miR399e	0	0	0	0	#DIV/0!	0	#DIV/0!	#DIV/0!	0	0	0	0
ath-miR399f	#DIV/0!	0	#DIV/0!	#DIV/0!	1	0.571429	0.785714	0.303046	0.6	0.714286	0.657143	0.0808125
ath-miR400	0	0.428571	0.214286	0.303046	0	0.55	0.275	0.388909	0.375	0.428571	0.401786	0.0378801
ath-miR402	0.0326087	0.00813007	0.0203694	0.017309	0.0227273	0.0285714	0.0256493	0.00413243	0.0555557	0	0.0277778	0.0392838
ath-miR403-3p	0.502975	0.462562	0.482769	0.0285762	0.453368	0.494158	0.473763	0.0288428	0.422712	0.402625	0.412669	0.0142039
ath-miR403-5p	0.713376	0.710811	0.712093	0.00181361	0.719072	0.716266	0.717669	0.00198444	0.792856	0.857723	0.82529	0.0458678
ath-miR404	#DIV/0!	#DIV/0!	#DIV/0!	#DIV/0!	0	0	0	0	0	0	0	0
ath-miR406	#DIV/0!	#DIV/0!	#DIV/0!	#DIV/0!	0	#DIV/0!	#DIV/0!	#DIV/0!	0	#DIV/0!	#DIV/0!	#DIV/0!
ath-miR408-3p	0.877665	0.861005	0.869335	0.0117799	0.831768	0.862738	0.847253	0.0218987	0.811536	0.803995	0.807765	0.00533218
ath-miR408-5p	0.824238	0.84537	0.834804	0.0149425	0.799688	0.802659	0.801173	0.00210096	0.797786	0.769294	0.78354	0.0201464
ath-miR419	#DIV/0!	#DIV/0!	#DIV/0!	#DIV/0!	#DIV/0!	#DIV/0!	#DIV/0!	#DIV/0!	0	#DIV/0!	#DIV/0!	#DIV/0!
ath-miR4221	#DIV/0!	0.4	#DIV/0!	#DIV/0!	0.5	0.666667	0.583333	0.117852	0.5	#DIV/0!	#DIV/0!	#DIV/0!
ath-miR4227	#DIV/0!	#DIV/0!	#DIV/0!	#DIV/0!	0	#DIV/0!	#DIV/0!	#DIV/0!	#DIV/0!	0	#DIV/0!	#DIV/0!
ath-miR4228-3p	0.529411	0.391304	0.460357	0.0976561	0	0.538462	0.269231	0.38075	0.5	1	0.75	0.353553
ath-miR4228-5p	#DIV/0!	#DIV/0!	#DIV/0!	#DIV/0!	0	#DIV/0!	#DIV/0!	#DIV/0!	#DIV/0!	#DIV/0!	#DIV/0!	#DIV/0!
ath-miR4239	#DIV/0!	#DIV/0!	#DIV/0!	#DIV/0!	#DIV/0!	#DIV/0!	#DIV/0!	#DIV/0!	#DIV/0!	#DIV/0!	#DIV/0!	#DIV/0!
ath-miR4243	#DIV/0!	#DIV/0!	#DIV/0!	#DIV/0!	#DIV/0!	0	#DIV/0!	#DIV/0!	0	#DIV/0!	#DIV/0!	#DIV/0!
ath-miR4245	#DIV/0!	#DIV/0!	#DIV/0!	#DIV/0!	1	#DIV/0!	#DIV/0!	#DIV/0!	#DIV/0!	#DIV/0!	#DIV/0!	#DIV/0!
ath-miR447a-3p	0.623391	0.584246	0.603818	0.0276794	0.346473	0.398522	0.372498	0.0368046	0.415585	0.373913	0.394749	0.0294663
ath-miR447a.2-3p	0.491379	0.613894	0.552637	0.0866309	0.714286	0.703839	0.709062	0.00738704	0.74028	0.756708	0.748494	0.0116167
ath-miR447b	0.623391	0.584246	0.603818	0.0276794	0.346473	0.398522	0.372498	0.0368046	0.415585	0.373913	0.394749	0.0294663
ath-miR447c-3p	#DIV/0!	#DIV/0!	#DIV/0!	#DIV/0!	#DIV/0!	0	#DIV/0!	#DIV/0!	#DIV/0!	#DIV/0!	#DIV/0!	#DIV/0!
ath-miR447c-5p	#DIV/0!	#DIV/0!	#DIV/0!	#DIV/0!	#DIV/0!	#DIV/0!	#DIV/0!	#DIV/0!	#DIV/0!	#DIV/0!	#DIV/0!	#DIV/0!
ath-miR472-3p	0.721244	0.77027	0.745757	0.0346666	0.729604	0.759347	0.744475	0.0210318	0.706754	0.717557	0.712156	0.00763852
ath-miR472-5p	0.5	#DIV/0!	#DIV/0!	#DIV/0!	1	0.5	0.75	0.353553	#DIV/0!	0	#DIV/0!	#DIV/0!
ath-miR5012	0.391305	0.350319	0.370812	0.0289814	0.349776	0.327704	0.33874	0.0156077	0.689075	0.574074	0.631575	0.0813184
ath-miR5013	1	#DIV/0!	#DIV/0!	#DIV/0!	#DIV/0!	1	#DIV/0!	#DIV/0!	#DIV/0!	#DIV/0!	#DIV/0!	#DIV/0!
ath-miR5014a-3p	#DIV/0!	0	#DIV/0!	#DIV/0!	#DIV/0!	#DIV/0!	#DIV/0!	#DIV/0!	#DIV/0!	#DIV/0!	#DIV/0!	#DIV/0!
ath-miR5014a-5p	#DIV/0!	#DIV/0!	#DIV/0!	#DIV/0!	#DIV/0!	#DIV/0!	#DIV/0!	#DIV/0!	#DIV/0!	#DIV/0!	#DIV/0!	#DIV/0!
ath-miR5014b	#DIV/0!	#DIV/0!	#DIV/0!	#DIV/0!	#DIV/0!	#DIV/0!	#DIV/0!	#DIV/0!	#DIV/0!	#DIV/0!	#DIV/0!	#DIV/0!
ath-miR5019	#DIV/0!	#DIV/0!	#DIV/0!	#DIV/0!	#DIV/0!	1	#DIV/0!	#DIV/0!	#DIV/0!	#DIV/0!	#DIV/0!	#DIV/0!
ath-miR5020a	0.5	#DIV/0!	#DIV/0!	#DIV/0!	#DIV/0!	#DIV/0!	#DIV/0!	#DIV/0!	#DIV/0!	#DIV/0!	#DIV/0!	#DIV/0!
ath-miR5020b	#DIV/0!	#DIV/0!	#DIV/0!	#DIV/0!	#DIV/0!	#DIV/0!	#DIV/0!	#DIV/0!	#DIV/0!	#DIV/0!	#DIV/0!	#DIV/0!
ath-miR5020c	0	0	0	0	#DIV/0!	#DIV/0!	#DIV/0!	#DIV/0!	#DIV/0!	#DIV/0!	#DIV/0!	#DIV/0!
ath-miR5023	#DIV/0!	#DIV/0!	#DIV/0!	#DIV/0!	#DIV/0!	0	#DIV/0!	#DIV/0!	#DIV/0!	#DIV/0!	#DIV/0!	#DIV/0!
ath-miR5024-3p	0.790849	0.799107	0.794978	0.00583912	0.692308	0.8	0.746154	0.0761498	1	0.714286	0.857143	0.20203
ath-miR5024-5p	#DIV/0!	#DIV/0!	#DIV/0!	#DIV/0!	#DIV/0!	#DIV/0!	#DIV/0!	#DIV/0!	#DIV/0!	#DIV/0!	#DIV/0!	#DIV/0!
ath-miR5026	0.84143	0.882052	0.861741	0.0287239	0.84	0.853561	0.846781	0.00958927	0.774621	0.764286	0.769454	0.00730831
ath-miR5027	#DIV/0!	0	#DIV/0!	#DIV/0!	#DIV/0!	#DIV/0!	#DIV/0!	#DIV/0!	1	#DIV/0!	#DIV/0!	#DIV/0!
ath-miR5028	0	0.428572	0.214286	0.303046	0.428572	0.416667	0.422619	0.00841805	0.250001	0.600001	0.425001	0.247487
ath-miR5029	#DIV/0!	#DIV/0!	#DIV/0!	#DIV/0!	#DIV/0!	#DIV/0!	#DIV/0!	#DIV/0!	#DIV/0!	#DIV/0!	#DIV/0!	#DIV/0!
ath-miR5595a	1	1	1	0	1	0.666666	0.833333	0.235703	#DIV/0!	1	#DIV/0!	#DIV/0!
ath-miR5629	0.416667	0	0.208333	0.294628	0	0.333333	0.166667	0.235702	0.2	0	0.1	0.141421
ath-miR5631	#DIV/0!	#DIV/0!	#DIV/0!	#DIV/0!	0	0	0	0	#DIV/0!	#DIV/0!	#DIV/0!	#DIV/0!
ath-miR5632-3p	1	0	0.5	0.707107	#DIV/0!	1	#DIV/0!	#DIV/0!	#DIV/0!	#DIV/0!	#DIV/0!	#DIV/0!
ath-miR5632-5p	1	#DIV/0!	#DIV/0!	#DIV/0!	#DIV/0!	0.8	#DIV/0!	#DIV/0!	1	0	0.5	0.707107
ath-miR5633	#DIV/0!	#DIV/0!	#DIV/0!	#DIV/0!	#DIV/0!	#DIV/0!	#DIV/0!	#DIV/0!	1	#DIV/0!	#DIV/0!	#DIV/0!
ath-miR5634	#DIV/0!	#DIV/0!	#DIV/0!	#DIV/0!	#DIV/0!	#DIV/0!	#DIV/0!	#DIV/0!	#DIV/0!	#DIV/0!	#DIV/0!	#DIV/0!
ath-miR5635a	#DIV/0!	#DIV/0!	#DIV/0!	#DIV/0!	#DIV/0!	#DIV/0!	#DIV/0!	#DIV/0!	#DIV/0!	#DIV/0!	#DIV/0!	#DIV/0!
ath-miR5635b	#DIV/0!	#DIV/0!	#DIV/0!	#DIV/0!	#DIV/0!	#DIV/0!	#DIV/0!	#DIV/0!	#DIV/0!	#DIV/0!	#DIV/0!	#DIV/0!
ath-miR5635c	#DIV/0!	#DIV/0!	#DIV/0!	#DIV/0!	#DIV/0!	#DIV/0!	#DIV/0!	#DIV/0!	#DIV/0!	#DIV/0!	#DIV/0!	#DIV/0!
ath-miR5635d	#DIV/0!	#DIV/0!	#DIV/0!	#DIV/0!	#DIV/0!	#DIV/0!	#DIV/0!	#DIV/0!	#DIV/0!	#DIV/0!	#DIV/0!	#DIV/0!
ath-miR5636	#DIV/0!	#DIV/0!	#DIV/0!	#DIV/0!	#DIV/0!	#DIV/0!	#DIV/0!	#DIV/0!	#DIV/0!	#DIV/0!	#DIV/0!	#DIV/0!
ath-miR5637	1	0.625	0.8125	0.265165	0.818182	0.757576	0.787879	0.0428552	0.9	1	0.95	0.0707108
ath-miR5638a	1	#DIV/0!	#DIV/0!	#DIV/0!	#DIV/0!	#DIV/0!	#DIV/0!	#DIV/0!	1	#DIV/0!	#DIV/0!	#DIV/0!
ath-miR5638b	#DIV/0!	#DIV/0!	#DIV/0!	#DIV/0!	0.5	0.714286	0.607143	0.151523	0	#DIV/0!	#DIV/0!	#DIV/0!
ath-miR5639-3p	#DIV/0!	#DIV/0!	#DIV/0!	#DIV/0!	#DIV/0!	#DIV/0!	#DIV/0!	#DIV/0!	#DIV/0!	#DIV/0!	#DIV/0!	#DIV/0!
ath-miR5639-5p	#DIV/0!	1	#DIV/0!	#DIV/0!	1	0.5	0.75	0.353553	1	1	1	0
ath-miR5640	0.0967742	0.0652173	0.0809958	0.0223141	0	0.14	0.07	0.098995	0.599999	0.333333	0.466666	0.188561
ath-miR5641	1	0.5	0.75	0.353553	#DIV/0!	0.333334	#DIV/0!	#DIV/0!	#DIV/0!	0	#DIV/0!	#DIV/0!
ath-miR5642a	0.0487807	0.0591715	0.0539761	0.00734739	0.00754006	0.0136129	0.0105765	0.00429412	0.0360112	0.0299625	0.0329868	0.00427705
ath-miR5642b	0.0487807	0.0591715	0.0539761	0.00734739	0.00754006	0.0136129	0.0105765	0.00429412	0.0360112	0.0299625	0.0329868	0.00427705
ath-miR5643a	#DIV/0!	1	#DIV/0!	#DIV/0!	1	0.75	0.875	0.176777	#DIV/0!	#DIV/0!	#DIV/0!	#DIV/0!
ath-miR5643b	#DIV/0!	1	#DIV/0!	#DIV/0!	1	0.75	0.875	0.176777	#DIV/0!	#DIV/0!	#DIV/0!	#DIV/0!
ath-miR5644	#DIV/0!	1	#DIV/0!	#DIV/0!	#DIV/0!	#DIV/0!	#DIV/0!	#DIV/0!	#DIV/0!	#DIV/0!	#DIV/0!	#DIV/0!
ath-miR5645a	#DIV/0!	#DIV/0!	#DIV/0!	#DIV/0!	#DIV/0!	#DIV/0!	#DIV/0!	#DIV/0!	#DIV/0!	#DIV/0!	#DIV/0!	#DIV/0!
ath-miR5645b	#DIV/0!	#DIV/0!	#DIV/0!	#DIV/0!	#DIV/0!	#DIV/0!	#DIV/0!	#DIV/0!	#DIV/0!	#DIV/0!	#DIV/0!	#DIV/0!
ath-miR5645c	#DIV/0!	#DIV/0!	#DIV/0!	#DIV/0!	#DIV/0!	0	#DIV/0!	#DIV/0!	#DIV/0!	#DIV/0!	#DIV/0!	#DIV/0!
ath-miR5645d	#DIV/0!	#DIV/0!	#DIV/0!	#DIV/0!	#DIV/0!	#DIV/0!	#DIV/0!	#DIV/0!	#DIV/0!	#DIV/0!	#DIV/0!	#DIV/0!
ath-miR5645e	#DIV/0!	#DIV/0!	#DIV/0!	#DIV/0!	#DIV/0!	#DIV/0!	#DIV/0!	#DIV/0!	#DIV/0!	#DIV/0!	#DIV/0!	#DIV/0!
ath-miR5645f	#DIV/0!	#DIV/0!	#DIV/0!	#DIV/0!	#DIV/0!	#DIV/0!	#DIV/0!	#DIV/0!	#DIV/0!	#DIV/0!	#DIV/0!	#DIV/0!
ath-miR5646	#DIV/0!	#DIV/0!	#DIV/0!	#DIV/0!	#DIV/0!	#DIV/0!	#DIV/0!	#DIV/0!	#DIV/0!	#DIV/0!	#DIV/0!	#DIV/0!
ath-miR5647	0	0	0	0	0	0	0	0	0	#DIV/0!	#DIV/0!	#DIV/0!
ath-miR5648-3p	#DIV/0!	#DIV/0!	#DIV/0!	#DIV/0!	#DIV/0!	#DIV/0!	#DIV/0!	#DIV/0!	#DIV/0!	#DIV/0!	#DIV/0!	#DIV/0!
ath-miR5648-5p	0.714286	0.538461	0.626373	0.124327	0.538462	0.5625	0.550481	0.0169978	0.846154	0.714286	0.78022	0.0932447
ath-miR5649a	#DIV/0!	#DIV/0!	#DIV/0!	#DIV/0!	#DIV/0!	#DIV/0!	#DIV/0!	#DIV/0!	#DIV/0!	#DIV/0!	#DIV/0!	#DIV/0!
ath-miR5649b	#DIV/0!	#DIV/0!	#DIV/0!	#DIV/0!	#DIV/0!	#DIV/0!	#DIV/0!	#DIV/0!	#DIV/0!	#DIV/0!	#DIV/0!	#DIV/0!
ath-miR5650	0.880597	0.807692	0.844145	0.0515514	0.904762	0.859649	0.882206	0.0318996	0.81081	0.956522	0.883666	0.103033
ath-miR5651	0.553571	0.558442	0.556007	0.00344395	0.461539	0.636363	0.548951	0.123619	0.843751	0.76	0.801875	0.0592209
ath-miR5652	0.833333	1	0.916667	0.117851	0.6875	0.827586	0.757543	0.0990557	1	1	1	0
ath-miR5653	0	0.0454544	0.0227272	0.0321411	0	0	0	0	0	#DIV/0!	#DIV/0!	#DIV/0!
ath-miR5654-3p	0.767372	0.799427	0.783399	0.0226665	0.753226	0.72615	0.739688	0.0191452	0.780702	0.793296	0.786999	0.0089053
ath-miR5654-5p	#DIV/0!	#DIV/0!	#DIV/0!	#DIV/0!	#DIV/0!	1	#DIV/0!	#DIV/0!	#DIV/0!	#DIV/0!	#DIV/0!	#DIV/0!
ath-miR5655	#DIV/0!	#DIV/0!	#DIV/0!	#DIV/0!	#DIV/0!	#DIV/0!	#DIV/0!	#DIV/0!	#DIV/0!	#DIV/0!	#DIV/0!	#DIV/0!
ath-miR5656	#DIV/0!	#DIV/0!	#DIV/0!	#DIV/0!	#DIV/0!	1	#DIV/0!	#DIV/0!	1	#DIV/0!	#DIV/0!	#DIV/0!
ath-miR5657	0	0	0	0	0	0	0	0	0	0	0	0
ath-miR5658	#DIV/0!	#DIV/0!	#DIV/0!	#DIV/0!	0	#DIV/0!	#DIV/0!	#DIV/0!	#DIV/0!	0	#DIV/0!	#DIV/0!
ath-miR5659	#DIV/0!	#DIV/0!	#DIV/0!	#DIV/0!	#DIV/0!	#DIV/0!	#DIV/0!	#DIV/0!	#DIV/0!	#DIV/0!	#DIV/0!	#DIV/0!
ath-miR5660	#DIV/0!	#DIV/0!	#DIV/0!	#DIV/0!	#DIV/0!	0	#DIV/0!	#DIV/0!	#DIV/0!	#DIV/0!	#DIV/0!	#DIV/0!
ath-miR5661	#DIV/0!	#DIV/0!	#DIV/0!	#DIV/0!	#DIV/0!	#DIV/0!	#DIV/0!	#DIV/0!	#DIV/0!	#DIV/0!	#DIV/0!	#DIV/0!
ath-miR5662	#DIV/0!	#DIV/0!	#DIV/0!	#DIV/0!	#DIV/0!	#DIV/0!	#DIV/0!	#DIV/0!	#DIV/0!	#DIV/0!	#DIV/0!	#DIV/0!
ath-miR5663-3p	#DIV/0!	#DIV/0!	#DIV/0!	#DIV/0!	1	#DIV/0!	#DIV/0!	#DIV/0!	#DIV/0!	#DIV/0!	#DIV/0!	#DIV/0!
ath-miR5663-5p	#DIV/0!	#DIV/0!	#DIV/0!	#DIV/0!	#DIV/0!	#DIV/0!	#DIV/0!	#DIV/0!	1	#DIV/0!	#DIV/0!	#DIV/0!
ath-miR5664	#DIV/0!	#DIV/0!	#DIV/0!	#DIV/0!	#DIV/0!	#DIV/0!	#DIV/0!	#DIV/0!	#DIV/0!	#DIV/0!	#DIV/0!	#DIV/0!
ath-miR5665	0	#DIV/0!	#DIV/0!	#DIV/0!	0	#DIV/0!	#DIV/0!	#DIV/0!	#DIV/0!	#DIV/0!	#DIV/0!	#DIV/0!
ath-miR5666	#DIV/0!	#DIV/0!	#DIV/0!	#DIV/0!	#DIV/0!	#DIV/0!	#DIV/0!	#DIV/0!	#DIV/0!	#DIV/0!	#DIV/0!	#DIV/0!
ath-miR5995b	1	1	1	0	1	0.666666	0.833333	0.235703	#DIV/0!	1	#DIV/0!	#DIV/0!
ath-miR5996	0.433645	0.577553	0.505599	0.101758	0.647059	0.549579	0.598319	0.0689287	0.631841	0.59322	0.61253	0.0273089
ath-miR5997	1	#DIV/0!	#DIV/0!	#DIV/0!	1	1	1	0	#DIV/0!	0	#DIV/0!	#DIV/0!
ath-miR5998a	#DIV/0!	#DIV/0!	#DIV/0!	#DIV/0!	#DIV/0!	#DIV/0!	#DIV/0!	#DIV/0!	#DIV/0!	#DIV/0!	#DIV/0!	#DIV/0!
ath-miR5998b	#DIV/0!	#DIV/0!	#DIV/0!	#DIV/0!	#DIV/0!	#DIV/0!	#DIV/0!	#DIV/0!	#DIV/0!	#DIV/0!	#DIV/0!	#DIV/0!
ath-miR5999	0	#DIV/0!	#DIV/0!	#DIV/0!	#DIV/0!	0	#DIV/0!	#DIV/0!	#DIV/0!	#DIV/0!	#DIV/0!	#DIV/0!
ath-miR771	0	0.166666	0.0833332	0.117851	0	0.272727	0.136364	0.192847	0.200001	0	0.1	0.141422
ath-miR773a	0.0266667	0.0205128	0.0235898	0.00435146	0.021978	0.0175879	0.019783	0.00310427	0.00181653	0.00776916	0.00479284	0.00420914
ath-miR773b-3p	0	#DIV/0!	#DIV/0!	#DIV/0!	0	0	0	0	0	#DIV/0!	#DIV/0!	#DIV/0!
ath-miR774a	#DIV/0!	#DIV/0!	#DIV/0!	#DIV/0!	#DIV/0!	#DIV/0!	#DIV/0!	#DIV/0!	#DIV/0!	#DIV/0!	#DIV/0!	#DIV/0!
ath-miR775	0.115033	0.122671	0.118852	0.0054009	0.62095	0.514668	0.567809	0.0751526	0.365384	0.416504	0.390944	0.0361472
ath-miR776	#DIV/0!	#DIV/0!	#DIV/0!	#DIV/0!	#DIV/0!	#DIV/0!	#DIV/0!	#DIV/0!	#DIV/0!	#DIV/0!	#DIV/0!	#DIV/0!
ath-miR777	#DIV/0!	#DIV/0!	#DIV/0!	#DIV/0!	1	0.9	0.95	0.0707107	0.675676	0.772727	0.724201	0.0686254
ath-miR778	#DIV/0!	#DIV/0!	#DIV/0!	#DIV/0!	#DIV/0!	#DIV/0!	#DIV/0!	#DIV/0!	#DIV/0!	#DIV/0!	#DIV/0!	#DIV/0!
ath-miR779.1	0	0	0	0	0	0	0	0	0	0	0	0
ath-miR779.2	0.772727	0.794118	0.783423	0.0151255	0.8125	0.825581	0.819041	0.00924982	0.75	0.775	0.7625	0.0176778
ath-miR780.1	0.764705	0.818182	0.791444	0.0378136	1	0.785714	0.892857	0.151523	0.5	1	0.75	0.353553
ath-miR780.2	0.5	0	0.25	0.353553	0.5	0.75	0.625	0.176777	0.666667	1	0.833333	0.235702
ath-miR781a	0.500001	0.483791	0.491896	0.0114622	0.541176	0.549495	0.545336	0.00588213	0.495495	0.557047	0.526271	0.0435235
ath-miR781b	0.500001	0.483791	0.491896	0.0114622	0.541176	0.549495	0.545336	0.00588213	0.495495	0.557047	0.526271	0.0435235
ath-miR782	#DIV/0!	#DIV/0!	#DIV/0!	#DIV/0!	#DIV/0!	#DIV/0!	#DIV/0!	#DIV/0!	#DIV/0!	#DIV/0!	#DIV/0!	#DIV/0!
ath-miR8121	#DIV/0!	#DIV/0!	#DIV/0!	#DIV/0!	#DIV/0!	#DIV/0!	#DIV/0!	#DIV/0!	#DIV/0!	#DIV/0!	#DIV/0!	#DIV/0!
ath-miR8165	#DIV/0!	#DIV/0!	#DIV/0!	#DIV/0!	#DIV/0!	#DIV/0!	#DIV/0!	#DIV/0!	#DIV/0!	#DIV/0!	#DIV/0!	#DIV/0!
ath-miR8166	#DIV/0!	#DIV/0!	#DIV/0!	#DIV/0!	0	#DIV/0!	#DIV/0!	#DIV/0!	#DIV/0!	#DIV/0!	#DIV/0!	#DIV/0!
ath-miR8167a	#DIV/0!	#DIV/0!	#DIV/0!	#DIV/0!	#DIV/0!	#DIV/0!	#DIV/0!	#DIV/0!	#DIV/0!	#DIV/0!	#DIV/0!	#DIV/0!
ath-miR8167b	#DIV/0!	#DIV/0!	#DIV/0!	#DIV/0!	#DIV/0!	#DIV/0!	#DIV/0!	#DIV/0!	#DIV/0!	#DIV/0!	#DIV/0!	#DIV/0!
ath-miR8167c	#DIV/0!	#DIV/0!	#DIV/0!	#DIV/0!	#DIV/0!	#DIV/0!	#DIV/0!	#DIV/0!	#DIV/0!	#DIV/0!	#DIV/0!	#DIV/0!
ath-miR8167d	#DIV/0!	#DIV/0!	#DIV/0!	#DIV/0!	#DIV/0!	#DIV/0!	#DIV/0!	#DIV/0!	#DIV/0!	#DIV/0!	#DIV/0!	#DIV/0!
ath-miR8167e	#DIV/0!	#DIV/0!	#DIV/0!	#DIV/0!	#DIV/0!	#DIV/0!	#DIV/0!	#DIV/0!	#DIV/0!	#DIV/0!	#DIV/0!	#DIV/0!
ath-miR8167f	#DIV/0!	#DIV/0!	#DIV/0!	#DIV/0!	#DIV/0!	#DIV/0!	#DIV/0!	#DIV/0!	#DIV/0!	#DIV/0!	#DIV/0!	#DIV/0!
ath-miR8168	#DIV/0!	#DIV/0!	#DIV/0!	#DIV/0!	#DIV/0!	0	#DIV/0!	#DIV/0!	#DIV/0!	#DIV/0!	#DIV/0!	#DIV/0!
ath-miR8169	#DIV/0!	#DIV/0!	#DIV/0!	#DIV/0!	#DIV/0!	#DIV/0!	#DIV/0!	#DIV/0!	1	#DIV/0!	#DIV/0!	#DIV/0!
ath-miR8170-3p	0.25	0	0.125	0.176777	#DIV/0!	0	#DIV/0!	#DIV/0!	1	#DIV/0!	#DIV/0!	#DIV/0!
ath-miR8170-5p	#DIV/0!	#DIV/0!	#DIV/0!	#DIV/0!	#DIV/0!	#DIV/0!	#DIV/0!	#DIV/0!	#DIV/0!	#DIV/0!	#DIV/0!	#DIV/0!
ath-miR8171	#DIV/0!	#DIV/0!	#DIV/0!	#DIV/0!	0	#DIV/0!	#DIV/0!	#DIV/0!	#DIV/0!	#DIV/0!	#DIV/0!	#DIV/0!
ath-miR8172	#DIV/0!	#DIV/0!	#DIV/0!	#DIV/0!	#DIV/0!	#DIV/0!	#DIV/0!	#DIV/0!	#DIV/0!	#DIV/0!	#DIV/0!	#DIV/0!
ath-miR8173	#DIV/0!	#DIV/0!	#DIV/0!	#DIV/0!	#DIV/0!	#DIV/0!	#DIV/0!	#DIV/0!	#DIV/0!	#DIV/0!	#DIV/0!	#DIV/0!
ath-miR8174	#DIV/0!	#DIV/0!	#DIV/0!	#DIV/0!	#DIV/0!	#DIV/0!	#DIV/0!	#DIV/0!	#DIV/0!	#DIV/0!	#DIV/0!	#DIV/0!
ath-miR8175	#DIV/0!	#DIV/0!	#DIV/0!	#DIV/0!	#DIV/0!	#DIV/0!	#DIV/0!	#DIV/0!	#DIV/0!	#DIV/0!	#DIV/0!	#DIV/0!
ath-miR8177	#DIV/0!	#DIV/0!	#DIV/0!	#DIV/0!	#DIV/0!	#DIV/0!	#DIV/0!	#DIV/0!	#DIV/0!	#DIV/0!	#DIV/0!	#DIV/0!
ath-miR8178	#DIV/0!	#DIV/0!	#DIV/0!	#DIV/0!	#DIV/0!	#DIV/0!	#DIV/0!	#DIV/0!	#DIV/0!	#DIV/0!	#DIV/0!	#DIV/0!
ath-miR8179	#DIV/0!	0.75	#DIV/0!	#DIV/0!	0.6	0.888889	0.744445	0.204275	0.333333	0.5	0.416667	0.117851
ath-miR8180	0	#DIV/0!	#DIV/0!	#DIV/0!	0	0.666666	0.333333	0.471404	#DIV/0!	#DIV/0!	#DIV/0!	#DIV/0!
ath-miR8181	#DIV/0!	#DIV/0!	#DIV/0!	#DIV/0!	#DIV/0!	#DIV/0!	#DIV/0!	#DIV/0!	#DIV/0!	#DIV/0!	#DIV/0!	#DIV/0!
ath-miR8182	0.727272	0.777777	0.752525	0.0357124	0.666667	0.72	0.693334	0.0377123	0.666667	1	0.833333	0.235702
ath-miR8183	0.528302	0.697675	0.612988	0.119765	0.705882	0.625	0.665441	0.0571925	0.636363	0.625	0.630682	0.00803471
ath-miR8184	0	0	0	0	1	0	0.5	0.707107	#DIV/0!	1	#DIV/0!	#DIV/0!
ath-miR822-3p	0.323529	0.239999	0.281764	0.0590645	0.68421	0.507692	0.595951	0.124817	0.603774	0.589744	0.596759	0.00992071
ath-miR822-5p	0.735849	0.634329	0.685089	0.0717856	0.684636	0.727699	0.706168	0.0304501	0.703937	0.663917	0.683927	0.0282982
ath-miR823	0.555556	0.609329	0.582442	0.0380236	0.736	0.68458	0.71029	0.0363596	0.6875	0.789474	0.738487	0.0721065
ath-miR824-3p	0.5	1	0.75	0.353553	0.6	0.75	0.675	0.106066	0.4	0.555555	0.477778	0.109994
ath-miR824-5p	0.777778	0.746268	0.762023	0.0222806	0.54386	0.736434	0.640147	0.136171	0.726027	0.717742	0.721885	0.00585853
ath-miR825	0.665574	0.633577	0.649575	0.0226255	0.899471	0.885058	0.892264	0.0101918	0.774675	0.800525	0.7876	0.0182792
ath-miR826a	#DIV/0!	1	#DIV/0!	#DIV/0!	#DIV/0!	#DIV/0!	#DIV/0!	#DIV/0!	1	1	1	0
ath-miR826b	#DIV/0!	#DIV/0!	#DIV/0!	#DIV/0!	#DIV/0!	#DIV/0!	#DIV/0!	#DIV/0!	#DIV/0!	#DIV/0!	#DIV/0!	#DIV/0!
ath-miR827	0.615384	0.684211	0.649797	0.0486682	0.125	0.5	0.3125	0.265165	0.600001	0.384616	0.492308	0.1523
ath-miR828	1	0.666667	0.833334	0.235702	0	0.272727	0.136364	0.192847	0.400001	0.750001	0.575001	0.247487
ath-miR829-3p.1	#DIV/0!	#DIV/0!	#DIV/0!	#DIV/0!	#DIV/0!	#DIV/0!	#DIV/0!	#DIV/0!	1	#DIV/0!	#DIV/0!	#DIV/0!
ath-miR829-3p.2	0.5	0.875	0.6875	0.265165	0.5	0.9	0.7	0.282843	0.875	0.666667	0.770833	0.147314
ath-miR829-5p	1	0.4	0.7	0.424264	1	1	1	0	0.166667	0.5	0.333334	0.235702
ath-miR830-3p	#DIV/0!	1	#DIV/0!	#DIV/0!	#DIV/0!	1	#DIV/0!	#DIV/0!	#DIV/0!	0.666667	#DIV/0!	#DIV/0!
ath-miR830-5p	1	1	1	0	1	0.666666	0.833333	0.235703	#DIV/0!	0.5	#DIV/0!	#DIV/0!
ath-miR831-3p	0.949593	0.926396	0.937995	0.0164033	0.904762	0.964824	0.934793	0.0424704	0.954545	0.923077	0.938811	0.0222516
ath-miR831-5p	#DIV/0!	#DIV/0!	#DIV/0!	#DIV/0!	#DIV/0!	#DIV/0!	#DIV/0!	#DIV/0!	#DIV/0!	#DIV/0!	#DIV/0!	#DIV/0!
ath-miR832-3p	#DIV/0!	#DIV/0!	#DIV/0!	#DIV/0!	#DIV/0!	#DIV/0!	#DIV/0!	#DIV/0!	#DIV/0!	#DIV/0!	#DIV/0!	#DIV/0!
ath-miR832-5p	#DIV/0!	#DIV/0!	#DIV/0!	#DIV/0!	#DIV/0!	#DIV/0!	#DIV/0!	#DIV/0!	#DIV/0!	#DIV/0!	#DIV/0!	#DIV/0!
ath-miR833a-3p	#DIV/0!	1	#DIV/0!	#DIV/0!	0	0	0	0	#DIV/0!	#DIV/0!	#DIV/0!	#DIV/0!
ath-miR833a-5p	0.663266	0.73913	0.701198	0.0536444	0.595238	0.469879	0.532559	0.0886422	0.551724	0.375	0.463362	0.124963
ath-miR833b	0.333334	0.3125	0.322917	0.0147313	0	0.222222	0.111111	0.157135	0.272726	0.5	0.386363	0.160707
ath-miR834	#DIV/0!	1	#DIV/0!	#DIV/0!	0	1	0.5	0.707107	#DIV/0!	#DIV/0!	#DIV/0!	#DIV/0!
ath-miR835-3p	1	0	0.5	0.707107	#DIV/0!	0	#DIV/0!	#DIV/0!	#DIV/0!	#DIV/0!	#DIV/0!	#DIV/0!
ath-miR835-5p	1	#DIV/0!	#DIV/0!	#DIV/0!	#DIV/0!	0.75	#DIV/0!	#DIV/0!	0.5	1	0.75	0.353553
ath-miR836	#DIV/0!	#DIV/0!	#DIV/0!	#DIV/0!	0	0	0	0	#DIV/0!	#DIV/0!	#DIV/0!	#DIV/0!
ath-miR837-3p	#DIV/0!	1	#DIV/0!	#DIV/0!	0.5	0.6	0.55	0.0707108	#DIV/0!	#DIV/0!	#DIV/0!	#DIV/0!
ath-miR837-5p	0	1	0.5	0.707107	1	1	1	0	#DIV/0!	1	#DIV/0!	#DIV/0!
ath-miR838	0.722772	0.788236	0.755504	0.0462896	0.846154	0.78077	0.813462	0.0462337	0.853933	0.865671	0.859802	0.00830057
ath-miR839-5p	0.818182	0.875	0.846591	0.0401766	0.836735	0.821428	0.829082	0.0108231	0.740741	0.72093	0.730835	0.0140085
ath-miR840-3p	0.319277	0.22093	0.270103	0.0695416	0.190476	0.26328	0.226878	0.0514798	0.283581	0.212121	0.247851	0.05053
ath-miR840-5p	0.333333	0.5	0.416666	0.117851	0.5	0.375	0.4375	0.0883883	0	1	0.5	0.707107
ath-miR841a-3p	0.26	0.5	0.38	0.169706	0.441176	0.600001	0.520589	0.112306	0.444444	0.4	0.422222	0.031427
ath-miR841a-5p	0.333333	0.368421	0.350877	0.0248107	0.375	0.526316	0.450658	0.106996	0.463414	0.580645	0.52203	0.0828942
ath-miR841b-3p	0.933962	0.929293	0.931628	0.00330152	0.8	0.887324	0.843662	0.0617474	0.875	1	0.9375	0.0883885
ath-miR841b-5p	0.428572	0.571429	0.5	0.101016	0.6	0.75	0.675	0.106066	0.250001	0.5	0.375	0.176776
ath-miR842	0.800001	0.461538	0.63077	0.239329	0.466667	0.333333	0.4	0.0942809	0.444444	0.363636	0.40404	0.0571402
ath-miR843	0.909299	0.935271	0.922285	0.0183649	0.83526	0.847743	0.841502	0.00882671	0.768657	0.695122	0.731889	0.0519973
ath-miR844-3p	0	0	0	0	0.75	0.611111	0.680556	0.0982093	0.454546	0.692307	0.573427	0.168123
ath-miR844-5p	#DIV/0!	#DIV/0!	#DIV/0!	#DIV/0!	#DIV/0!	1	#DIV/0!	#DIV/0!	1	#DIV/0!	#DIV/0!	#DIV/0!
ath-miR845a	0.946356	0.942587	0.944471	0.00266544	0.934498	0.947789	0.941144	0.00939847	0.925082	0.902439	0.91376	0.0160108
ath-miR845b	0.888889	0.855072	0.87198	0.0239119	1	0.935484	0.967742	0.0456198	0.5	1	0.75	0.353553
ath-miR846-3p	0.680106	0.701117	0.690611	0.0148573	0.819267	0.829306	0.824286	0.00709879	0.874141	0.862847	0.868494	0.00798641
ath-miR846-5p	0.345865	0.391961	0.368913	0.0325946	0.207207	0.371335	0.289271	0.116056	0.511111	0.539474	0.525292	0.0200558
ath-miR847	0.736842	0.767442	0.752142	0.0216375	0.805556	0.743903	0.774729	0.0435952	0.702128	0.805556	0.753842	0.0731347
ath-miR848	0.40625	0.552631	0.479441	0.103507	0.547619	0.510417	0.529018	0.0263062	0.431373	0.482759	0.457066	0.0363352
ath-miR849	#DIV/0!	#DIV/0!	#DIV/0!	#DIV/0!	#DIV/0!	#DIV/0!	#DIV/0!	#DIV/0!	#DIV/0!	#DIV/0!	#DIV/0!	#DIV/0!
ath-miR850	0.141647	0.0630443	0.102346	0.0555807	0.107143	0.109409	0.108276	0.00160256	0.0882353	0.0958905	0.0920629	0.00541307
ath-miR851-3p	1	1	1	0	#DIV/0!	1	#DIV/0!	#DIV/0!	#DIV/0!	#DIV/0!	#DIV/0!	#DIV/0!
ath-miR851-5p	0.333333	0	0.166666	0.235702	0	0.25	0.125	0.176777	0.5	0	0.25	0.353553
ath-miR852	#DIV/0!	#DIV/0!	#DIV/0!	#DIV/0!	1	0.875	0.9375	0.0883883	1	1	1	0
ath-miR853	0.333333	0.3	0.316666	0.02357	0	0.214286	0.107143	0.151523	0.181818	0.222222	0.20202	0.0285698
ath-miR855	#DIV/0!	#DIV/0!	#DIV/0!	#DIV/0!	#DIV/0!	#DIV/0!	#DIV/0!	#DIV/0!	#DIV/0!	#DIV/0!	#DIV/0!	#DIV/0!
ath-miR856	#DIV/0!	#DIV/0!	#DIV/0!	#DIV/0!	#DIV/0!	0	#DIV/0!	#DIV/0!	#DIV/0!	#DIV/0!	#DIV/0!	#DIV/0!
ath-miR857	0.470588	0.632353	0.551471	0.114385	0.426829	0.487705	0.457267	0.0430459	0.521739	0.625	0.57337	0.0730166
ath-miR858a	0.335026	0.420936	0.377981	0.0607473	0.525168	0.515363	0.520266	0.00693308	0.517545	0.528917	0.523231	0.00804155
ath-miR858b	0.546667	0.538461	0.542564	0.00580246	0.720183	0.69163	0.705907	0.0201903	0.744318	0.754153	0.749236	0.00695458
ath-miR859	0.2	0.5	0.35	0.212132	0.2	0.40625	0.303125	0.145841	0.599999	0.5	0.549999	0.0707099
ath-miR860	0.4	0.631579	0.51579	0.163751	0.5	0.272727	0.386364	0.160706	0.5	0.500001	0.5	5.24813e-07
ath-miR861-3p	#DIV/0!	#DIV/0!	#DIV/0!	#DIV/0!	#DIV/0!	#DIV/0!	#DIV/0!	#DIV/0!	#DIV/0!	#DIV/0!	#DIV/0!	#DIV/0!
ath-miR861-5p	#DIV/0!	#DIV/0!	#DIV/0!	#DIV/0!	#DIV/0!	#DIV/0!	#DIV/0!	#DIV/0!	#DIV/0!	#DIV/0!	#DIV/0!	#DIV/0!
ath-miR862-3p	#DIV/0!	#DIV/0!	#DIV/0!	#DIV/0!	#DIV/0!	#DIV/0!	#DIV/0!	#DIV/0!	#DIV/0!	#DIV/0!	#DIV/0!	#DIV/0!
ath-miR862-5p	0.599999	0.774194	0.687096	0.123174	0.769231	0.827586	0.798408	0.0412632	0.736843	0.916667	0.826755	0.127155
ath-miR863-3p	0.857143	1	0.928572	0.101015	0.4	0.555556	0.477778	0.109995	0.75	1	0.875	0.176777
ath-miR863-5p	0.12963	0.115108	0.122369	0.0102684	0.6	0.539823	0.569912	0.0425513	0.761905	0.586207	0.674056	0.124237
ath-miR864-3p	#DIV/0!	#DIV/0!	#DIV/0!	#DIV/0!	#DIV/0!	#DIV/0!	#DIV/0!	#DIV/0!	#DIV/0!	0	#DIV/0!	#DIV/0!
ath-miR864-5p	0	0	0	0	0.142857	0.2	0.171429	0.040406	0.166667	0.2	0.183333	0.0235702
ath-miR865-3p	#DIV/0!	#DIV/0!	#DIV/0!	#DIV/0!	#DIV/0!	#DIV/0!	#DIV/0!	#DIV/0!	#DIV/0!	0	#DIV/0!	#DIV/0!
ath-miR865-5p	1	#DIV/0!	#DIV/0!	#DIV/0!	1	1	1	0	#DIV/0!	1	#DIV/0!	#DIV/0!
ath-miR866-3p	0.5	1	0.75	0.353553	#DIV/0!	0	#DIV/0!	#DIV/0!	#DIV/0!	#DIV/0!	#DIV/0!	#DIV/0!
ath-miR866-5p	0	0	0	0	0	0.133333	0.0666666	0.0942808	0.142857	0	0.0714286	0.101015
ath-miR868-3p	#DIV/0!	#DIV/0!	#DIV/0!	#DIV/0!	#DIV/0!	#DIV/0!	#DIV/0!	#DIV/0!	#DIV/0!	#DIV/0!	#DIV/0!	#DIV/0!
ath-miR868-5p	0	0	0	0	#DIV/0!	0.5	#DIV/0!	#DIV/0!	0.666667	0.5	0.583333	0.117851
ath-miR869.1	#DIV/0!	#DIV/0!	#DIV/0!	#DIV/0!	1	#DIV/0!	#DIV/0!	#DIV/0!	0	#DIV/0!	#DIV/0!	#DIV/0!
ath-miR869.2	0.0667721	0.0848503	0.0758112	0.0127833	0.472441	0.396285	0.434363	0.0538504	0.689655	0.804878	0.747267	0.0814743
ath-miR870-3p	1	1	1	0	0.8	1	0.9	0.141421	#DIV/0!	1	#DIV/0!	#DIV/0!
ath-miR870-5p	0	#DIV/0!	#DIV/0!	#DIV/0!	#DIV/0!	#DIV/0!	#DIV/0!	#DIV/0!	#DIV/0!	#DIV/0!	#DIV/0!	#DIV/0!
miR156ij	0.436363	0.412698	0.424531	0.0167337	0.117647	0.325842	0.221745	0.147216	0.238095	0.363636	0.300865	0.088771
miR159a-c	0.681807	0.718388	0.700097	0.0258665	0.603853	0.627199	0.615526	0.0165082	0.550713	0.555126	0.552919	0.0031204
miR167abd	0.531619	0.548478	0.540048	0.0119208	0.43717	0.33328	0.385225	0.0734615	0.301594	0.297047	0.299321	0.00321528
miR169a-c	0	0	0	0	0.125	0.111111	0.118055	0.00982095	0.333333	0.2	0.266667	0.0942807
miR172a-d	0.421052	0.52381	0.472431	0.0726611	0.648438	0.676	0.662219	0.0194894	0.601942	0.561111	0.581526	0.028872
miR319a-c	0.0742715	0.0593668	0.0668191	0.0105392	0.137703	0.13591	0.136807	0.00126773	0.259268	0.252825	0.256046	0.00455594
miR395a-f	0.902472	0.888766	0.895619	0.00969185	0.84962	0.889821	0.869721	0.0284264	0.831386	0.826467	0.828926	0.0034779
miR396ab	0.635199	0.647742	0.64147	0.00886946	0.67405	0.697185	0.685617	0.0163588	0.638682	0.620358	0.62952	0.0129572
miR398a-c	0.874398	0.871617	0.873007	0.00196624	0.839291	0.873481	0.856386	0.024176	0.823092	0.810078	0.816585	0.00920215
miR399a-f	0.936073	0.874715	0.905394	0.0433866	0.855556	0.875654	0.865605	0.0142121	0.757862	0.772487	0.765174	0.0103414

## Sheet: AGO1 IP-Ratio-TR
S4 Data. Composition of miRNA forms in AGO1 and AGO10 IP treated with SDN1 and SDN1 catalytic mutant (SDN1-D283A).
	AGO1 IP (Mock)				AGO1 IP (SDN1)				AGO1 IP (SDN1-D283A)
RPM	br1	br2	Mean	Stdev	br1	br2	Mean	Stdev	br1	br2	Mean	Stdev
ath-miR156a-3p	1	0.5	0.75	0.353553	0.25	0	0.125	0.176777	0.250001	#DIV/0!	#DIV/0!	#DIV/0!
ath-miR156a-5p	0.326284	0.309914	0.318099	0.0115753	0.470323	0.462438	0.46638	0.00557518	0.494965	0.487856	0.491411	0.00502705
ath-miR156b-3p	0.921738	0.934851	0.928295	0.00927216	0.486755	0.549816	0.518285	0.0445909	0.349654	0.343425	0.34654	0.00440448
ath-miR156b-5p	0.326284	0.309914	0.318099	0.0115753	0.470323	0.462438	0.46638	0.00557518	0.494965	0.487856	0.491411	0.00502705
ath-miR156c-3p	1	0	0.5	0.707107	#DIV/0!	0.25	#DIV/0!	#DIV/0!	0	0	0	0
ath-miR156c-5p	0.326284	0.309914	0.318099	0.0115753	0.470323	0.462438	0.46638	0.00557518	0.494965	0.487856	0.491411	0.00502705
ath-miR156d-3p	#DIV/0!	#DIV/0!	#DIV/0!	#DIV/0!	#DIV/0!	#DIV/0!	#DIV/0!	#DIV/0!	#DIV/0!	#DIV/0!	#DIV/0!	#DIV/0!
ath-miR156d-5p	0.326284	0.309914	0.318099	0.0115753	0.470323	0.462438	0.46638	0.00557518	0.494965	0.487856	0.491411	0.00502705
ath-miR156e	0.326284	0.309914	0.318099	0.0115753	0.470323	0.462438	0.46638	0.00557518	0.494965	0.487856	0.491411	0.00502705
ath-miR156f-3p	#DIV/0!	#DIV/0!	#DIV/0!	#DIV/0!	#DIV/0!	#DIV/0!	#DIV/0!	#DIV/0!	#DIV/0!	#DIV/0!	#DIV/0!	#DIV/0!
ath-miR156f-5p	0.326284	0.309914	0.318099	0.0115753	0.470323	0.462438	0.46638	0.00557518	0.494965	0.487856	0.491411	0.00502705
ath-miR156g	0.361963	0.359307	0.360635	0.00187787	0.558823	0.421642	0.490233	0.0970021	0.552632	0.457143	0.504887	0.0675206
ath-miR156h	0.666666	0.714286	0.690476	0.0336718	0.5	0.5	0.5	0	0.4	0.5	0.45	0.0707107
ath-miR156i	1	1	1	0	1	0.977273	0.988636	0.0160707	1	1	1	0
ath-miR156j	0.5	0.509434	0.504717	0.0066708	0.866667	0.636363	0.751515	0.162849	0.761905	0.636364	0.699135	0.0887711
ath-miR157a-3p	0.285715	0.157894	0.221805	0.0903825	0.0833333	0.166667	0.125	0.0589256	0.5	0	0.25	0.353553
ath-miR157a-5p	0.793212	0.798352	0.795782	0.00363424	0.782771	0.782486	0.782629	0.000202045	0.747154	0.723495	0.735324	0.0167294
ath-miR157b-3p	0.285715	0.157894	0.221805	0.0903825	0.0833333	0.166667	0.125	0.0589256	0.5	0	0.25	0.353553
ath-miR157b-5p	0.793212	0.798352	0.795782	0.00363424	0.782771	0.782486	0.782629	0.000202045	0.747154	0.723495	0.735324	0.0167294
ath-miR157c-3p	0.344828	0.451613	0.39822	0.0755085	0.55	0.418919	0.484459	0.0926883	0.483871	0.421053	0.452462	0.0444189
ath-miR157c-5p	0.793212	0.798352	0.795782	0.00363424	0.782771	0.782486	0.782629	0.000202045	0.747154	0.723495	0.735324	0.0167294
ath-miR157d	0.845238	0.856471	0.850854	0.00794254	0.852535	0.864769	0.858652	0.00865084	0.845455	0.801205	0.82333	0.0312894
ath-miR158a-3p	0.691627	0.678387	0.685007	0.00936207	0.732359	0.704607	0.718483	0.0196234	0.633	0.621139	0.627069	0.00838704
ath-miR158a-5p	0.118687	0.101695	0.110191	0.0120149	0.0701754	0.111607	0.0908913	0.0292968	0.1	0.217391	0.158696	0.083008
ath-miR158b	0.706844	0.655036	0.68094	0.0366338	0.760175	0.695839	0.728007	0.0454919	0.586986	0.590219	0.588602	0.00228582
ath-miR159a	0.329909	0.288456	0.309182	0.0293122	0.457703	0.431563	0.444633	0.0184842	0.468786	0.451629	0.460208	0.0121324
ath-miR159b-3p	0.376149	0.335886	0.356017	0.0284705	0.502024	0.498865	0.500444	0.00223416	0.575402	0.574372	0.574887	0.00072851
ath-miR159b-5p	0.25	0	0.125	0.176777	0.166667	0.0833333	0.125	0.0589256	0	0.142857	0.0714286	0.101015
ath-miR159c	0.990796	0.989215	0.990005	0.00111759	0.989927	0.993362	0.991644	0.00242927	0.987132	0.981948	0.98454	0.00366549
ath-miR160a-3p	#DIV/0!	#DIV/0!	#DIV/0!	#DIV/0!	0	#DIV/0!	#DIV/0!	#DIV/0!	#DIV/0!	#DIV/0!	#DIV/0!	#DIV/0!
ath-miR160a-5p	0.839953	0.785146	0.81255	0.0387547	0.734088	0.659658	0.696873	0.0526303	0.541182	0.508939	0.52506	0.0227991
ath-miR160b	0.839953	0.785146	0.81255	0.0387547	0.734088	0.659658	0.696873	0.0526303	0.541182	0.508939	0.52506	0.0227991
ath-miR160c-3p	#DIV/0!	0	#DIV/0!	#DIV/0!	0.5	0.6	0.55	0.0707108	#DIV/0!	1	#DIV/0!	#DIV/0!
ath-miR160c-5p	0.839953	0.785146	0.81255	0.0387547	0.734088	0.659658	0.696873	0.0526303	0.541182	0.508939	0.52506	0.0227991
ath-miR161.1	0.143517	0.111204	0.127361	0.0228488	0.149379	0.122738	0.136059	0.0188385	0.184568	0.207202	0.195885	0.0160051
ath-miR161.2	0.604743	0.62117	0.612956	0.0116155	0.666667	0.603586	0.635126	0.0446048	0.626923	0.625699	0.626311	0.000866027
ath-miR162a-3p	0.177615	0.221508	0.199562	0.0310366	0.316923	0.283727	0.300325	0.0234731	0.325173	0.331084	0.328129	0.00417997
ath-miR162a-5p	0.0940328	0.0987841	0.0964084	0.00335967	0.079861	0.0940959	0.0869785	0.0100656	0.136752	0.113208	0.12498	0.0166484
ath-miR162b-3p	0.177615	0.221508	0.199562	0.0310366	0.316923	0.283727	0.300325	0.0234731	0.325173	0.331084	0.328129	0.00417997
ath-miR162b-5p	0.0940328	0.0987841	0.0964084	0.00335967	0.079861	0.0940959	0.0869785	0.0100656	0.136752	0.113208	0.12498	0.0166484
ath-miR163	0.456637	0.433314	0.444975	0.0164921	0.535932	0.538591	0.537262	0.00187992	0.333012	0.311684	0.322348	0.0150814
ath-miR164a	0.466232	0.452714	0.459473	0.00955878	0.371833	0.389573	0.380703	0.012544	0.298664	0.287603	0.293134	0.00782144
ath-miR164b-3p	0	0.0714283	0.0357141	0.0505074	0.0833333	0.292683	0.188008	0.148033	0.212122	0.129032	0.170577	0.0587533
ath-miR164b-5p	0.466232	0.452714	0.459473	0.00955878	0.371833	0.389573	0.380703	0.012544	0.298664	0.287603	0.293134	0.00782144
ath-miR164c-3p	0.076923	0.454546	0.265735	0.26702	0	0.1	0.05	0.0707107	0.6	0.333333	0.466667	0.188562
ath-miR164c-5p	0.774342	0.807476	0.790909	0.0234294	0.846621	0.854077	0.850349	0.00527256	0.794872	0.762128	0.7785	0.0231533
ath-miR165a-3p	0.381457	0.350389	0.365923	0.0219683	0.346077	0.308811	0.327444	0.0263508	0.307064	0.306202	0.306633	0.000609573
ath-miR165a-5p	0.166666	#DIV/0!	#DIV/0!	#DIV/0!	0	0	0	0	#DIV/0!	#DIV/0!	#DIV/0!	#DIV/0!
ath-miR165b	0.381457	0.350389	0.365923	0.0219683	0.346077	0.308811	0.327444	0.0263508	0.307064	0.306202	0.306633	0.000609573
ath-miR166a-3p	0.275683	0.25669	0.266187	0.0134303	0.298525	0.267905	0.283215	0.0216517	0.22371	0.221675	0.222692	0.00143906
ath-miR166a-5p	#DIV/0!	0.5	#DIV/0!	#DIV/0!	1	0.333333	0.666667	0.471405	#DIV/0!	0	#DIV/0!	#DIV/0!
ath-miR166b-3p	0.275683	0.25669	0.266187	0.0134303	0.298525	0.267905	0.283215	0.0216517	0.22371	0.221675	0.222692	0.00143906
ath-miR166b-5p	#DIV/0!	0.5	#DIV/0!	#DIV/0!	1	0.333333	0.666667	0.471405	#DIV/0!	0	#DIV/0!	#DIV/0!
ath-miR166c	0.275683	0.25669	0.266187	0.0134303	0.298525	0.267905	0.283215	0.0216517	0.22371	0.221675	0.222692	0.00143906
ath-miR166d	0.275683	0.25669	0.266187	0.0134303	0.298525	0.267905	0.283215	0.0216517	0.22371	0.221675	0.222692	0.00143906
ath-miR166e-3p	0.275683	0.25669	0.266187	0.0134303	0.298525	0.267905	0.283215	0.0216517	0.22371	0.221675	0.222692	0.00143906
ath-miR166e-5p	#DIV/0!	#DIV/0!	#DIV/0!	#DIV/0!	#DIV/0!	#DIV/0!	#DIV/0!	#DIV/0!	#DIV/0!	#DIV/0!	#DIV/0!	#DIV/0!
ath-miR166f	0.275683	0.25669	0.266187	0.0134303	0.298525	0.267905	0.283215	0.0216517	0.22371	0.221675	0.222692	0.00143906
ath-miR166g	0.275683	0.25669	0.266187	0.0134303	0.298525	0.267905	0.283215	0.0216517	0.22371	0.221675	0.222692	0.00143906
ath-miR167a-3p	#DIV/0!	#DIV/0!	#DIV/0!	#DIV/0!	0	0	0	0	0	0	0	0
ath-miR167a-5p	0.42219	0.410573	0.416381	0.0082146	0.520883	0.631842	0.576363	0.07846	0.644221	0.651012	0.647617	0.00480181
ath-miR167b	0.42219	0.410573	0.416381	0.0082146	0.520883	0.631842	0.576363	0.07846	0.644221	0.651012	0.647617	0.00480181
ath-miR167c-3p	0.119975	0.13929	0.129632	0.0136577	0.333959	0.256452	0.295205	0.0548057	0.230126	0.208	0.219063	0.0156454
ath-miR167c-5p	0.754717	0.641791	0.698254	0.0798508	0.6	0.735016	0.667508	0.0954706	0.598214	0.574469	0.586341	0.0167901
ath-miR167d	0.928491	0.952876	0.940684	0.0172425	0.97687	0.98255	0.97971	0.00401643	0.963731	0.962348	0.963039	0.00097814
ath-miR168a-3p	0.202312	0.169014	0.185663	0.0235453	0	0.35	0.175	0.247488	0.2	0.214286	0.207143	0.0101014
ath-miR168a-5p	0.294421	0.262359	0.27839	0.022671	0.350925	0.331104	0.341014	0.0140157	0.363393	0.347107	0.35525	0.0115157
ath-miR168b-3p	0	0	0	0	#DIV/0!	0	#DIV/0!	#DIV/0!	0.666667	#DIV/0!	#DIV/0!	#DIV/0!
ath-miR168b-5p	0.294421	0.262359	0.27839	0.022671	0.350925	0.331104	0.341014	0.0140157	0.363393	0.347107	0.35525	0.0115157
ath-miR169a-3p	#DIV/0!	#DIV/0!	#DIV/0!	#DIV/0!	#DIV/0!	#DIV/0!	#DIV/0!	#DIV/0!	#DIV/0!	#DIV/0!	#DIV/0!	#DIV/0!
ath-miR169a-5p	1	1	1	0	0.7	0.769231	0.734616	0.0489536	0.454545	0.666667	0.560606	0.149993
ath-miR169b-3p	#DIV/0!	#DIV/0!	#DIV/0!	#DIV/0!	#DIV/0!	#DIV/0!	#DIV/0!	#DIV/0!	#DIV/0!	#DIV/0!	#DIV/0!	#DIV/0!
ath-miR169b-5p	1	1	1	0	1	1	1	0	1	1	1	0
ath-miR169c	1	1	1	0	1	1	1	0	1	1	1	0
ath-miR169d	#DIV/0!	1	#DIV/0!	#DIV/0!	#DIV/0!	#DIV/0!	#DIV/0!	#DIV/0!	1	#DIV/0!	#DIV/0!	#DIV/0!
ath-miR169e	#DIV/0!	1	#DIV/0!	#DIV/0!	#DIV/0!	#DIV/0!	#DIV/0!	#DIV/0!	1	#DIV/0!	#DIV/0!	#DIV/0!
ath-miR169f-3p	0	#DIV/0!	#DIV/0!	#DIV/0!	#DIV/0!	#DIV/0!	#DIV/0!	#DIV/0!	0	#DIV/0!	#DIV/0!	#DIV/0!
ath-miR169f-5p	#DIV/0!	1	#DIV/0!	#DIV/0!	#DIV/0!	#DIV/0!	#DIV/0!	#DIV/0!	1	#DIV/0!	#DIV/0!	#DIV/0!
ath-miR169g-3p	#DIV/0!	#DIV/0!	#DIV/0!	#DIV/0!	#DIV/0!	#DIV/0!	#DIV/0!	#DIV/0!	#DIV/0!	#DIV/0!	#DIV/0!	#DIV/0!
ath-miR169g-5p	#DIV/0!	1	#DIV/0!	#DIV/0!	#DIV/0!	#DIV/0!	#DIV/0!	#DIV/0!	1	#DIV/0!	#DIV/0!	#DIV/0!
ath-miR169h	1	0.9	0.95	0.0707105	1	1	1	0	0.727274	0.714286	0.72078	0.00918355
ath-miR169i	1	0.9	0.95	0.0707105	1	1	1	0	0.727274	0.714286	0.72078	0.00918355
ath-miR169j	1	0.9	0.95	0.0707105	1	1	1	0	0.727274	0.714286	0.72078	0.00918355
ath-miR169k	1	0.9	0.95	0.0707105	1	1	1	0	0.727274	0.714286	0.72078	0.00918355
ath-miR169l	1	0.9	0.95	0.0707105	1	1	1	0	0.727274	0.714286	0.72078	0.00918355
ath-miR169m	1	0.9	0.95	0.0707105	1	1	1	0	0.727274	0.714286	0.72078	0.00918355
ath-miR169n	1	0.9	0.95	0.0707105	1	1	1	0	0.727274	0.714286	0.72078	0.00918355
ath-miR170-3p	#DIV/0!	0.333333	#DIV/0!	#DIV/0!	0.625	0.48	0.5525	0.10253	0.225	0.238096	0.231548	0.00925994
ath-miR170-5p	0.561514	0.4975	0.529507	0.0452649	0.405987	0.376557	0.391272	0.0208098	0.316185	0.366072	0.341128	0.0352756
ath-miR171a-3p	0.407407	0.447368	0.427387	0.0282566	0.529148	0.488226	0.508687	0.0289361	0.351021	0.29798	0.324501	0.0375055
ath-miR171a-5p	0.561514	0.4975	0.529507	0.0452649	0.405987	0.376557	0.391272	0.0208098	0.316185	0.366072	0.341128	0.0352756
ath-miR171b-3p	0.351064	0.311005	0.331034	0.0283262	0.569444	0.569149	0.569297	0.000209017	0.552846	0.467249	0.510047	0.0605261
ath-miR171b-5p	0	0	0	0	0	0.0769231	0.0384615	0.0543928	#DIV/0!	#DIV/0!	#DIV/0!	#DIV/0!
ath-miR171c-3p	0.351064	0.311005	0.331034	0.0283262	0.569444	0.569149	0.569297	0.000209017	0.552846	0.467249	0.510047	0.0605261
ath-miR171c-5p	0	0	0	0	0.666666	0.666667	0.666667	2.95851e-07	#DIV/0!	#DIV/0!	#DIV/0!	#DIV/0!
ath-miR172a	0.117647	0.162162	0.139905	0.0314769	0.162162	0.165919	0.164041	0.00265681	0.192307	0.234177	0.213242	0.0296067
ath-miR172b-3p	0.117647	0.162162	0.139905	0.0314769	0.162162	0.165919	0.164041	0.00265681	0.192307	0.234177	0.213242	0.0296067
ath-miR172b-5p	#DIV/0!	#DIV/0!	#DIV/0!	#DIV/0!	#DIV/0!	#DIV/0!	#DIV/0!	#DIV/0!	#DIV/0!	#DIV/0!	#DIV/0!	#DIV/0!
ath-miR172c	1	0.666667	0.833333	0.235702	0.8	0.829268	0.814634	0.0206959	0.848485	0.941176	0.894831	0.0655427
ath-miR172d-3p	1	0.666667	0.833333	0.235702	0.8	0.829268	0.814634	0.0206959	0.848485	0.941176	0.894831	0.0655427
ath-miR172d-5p	#DIV/0!	#DIV/0!	#DIV/0!	#DIV/0!	#DIV/0!	#DIV/0!	#DIV/0!	#DIV/0!	#DIV/0!	#DIV/0!	#DIV/0!	#DIV/0!
ath-miR172e-3p	#DIV/0!	0	#DIV/0!	#DIV/0!	0.333333	0.25	0.291667	0.0589254	0.125	0.333333	0.229167	0.147314
ath-miR172e-5p	#DIV/0!	#DIV/0!	#DIV/0!	#DIV/0!	#DIV/0!	#DIV/0!	#DIV/0!	#DIV/0!	#DIV/0!	#DIV/0!	#DIV/0!	#DIV/0!
ath-miR173-3p	0.985075	0.97561	0.980342	0.00669264	0.95	0.967213	0.958607	0.0121715	1	0.866667	0.933333	0.0942808
ath-miR173-5p	0.333977	0.274032	0.304004	0.0423873	0.348144	0.373939	0.361042	0.01824	0.36155	0.351639	0.356595	0.00700802
ath-miR1886.1	0.4	0	0.2	0.282842	#DIV/0!	0.214286	#DIV/0!	#DIV/0!	0	0	0	0
ath-miR1886.2	0.24	0.188679	0.21434	0.0362897	0.290323	0.302752	0.296537	0.00878872	0.21978	0.267857	0.243819	0.0339955
ath-miR1886.3	#DIV/0!	#DIV/0!	#DIV/0!	#DIV/0!	#DIV/0!	#DIV/0!	#DIV/0!	#DIV/0!	#DIV/0!	#DIV/0!	#DIV/0!	#DIV/0!
ath-miR1888a	0.491935	0.509616	0.500776	0.012502	0.364865	0.448133	0.406499	0.0588792	0.272727	0.278689	0.275708	0.00421552
ath-miR1888b	0.857143	0.769231	0.813187	0.0621637	#DIV/0!	0.5	#DIV/0!	#DIV/0!	0.5	0	0.25	0.353553
ath-miR2111a-3p	#DIV/0!	#DIV/0!	#DIV/0!	#DIV/0!	#DIV/0!	#DIV/0!	#DIV/0!	#DIV/0!	0	#DIV/0!	#DIV/0!	#DIV/0!
ath-miR2111a-5p	#DIV/0!	#DIV/0!	#DIV/0!	#DIV/0!	1	1	1	0	1	0	0.5	0.707107
ath-miR2111b-3p	#DIV/0!	#DIV/0!	#DIV/0!	#DIV/0!	#DIV/0!	0	#DIV/0!	#DIV/0!	0	#DIV/0!	#DIV/0!	#DIV/0!
ath-miR2111b-5p	#DIV/0!	#DIV/0!	#DIV/0!	#DIV/0!	1	1	1	0	1	0	0.5	0.707107
ath-miR2112-3p	1	0	0.5	0.707107	1	0.666667	0.833333	0.235702	0	0.428571	0.214285	0.303045
ath-miR2112-5p	#DIV/0!	#DIV/0!	#DIV/0!	#DIV/0!	#DIV/0!	#DIV/0!	#DIV/0!	#DIV/0!	#DIV/0!	#DIV/0!	#DIV/0!	#DIV/0!
ath-miR2933a	#DIV/0!	#DIV/0!	#DIV/0!	#DIV/0!	#DIV/0!	#DIV/0!	#DIV/0!	#DIV/0!	#DIV/0!	#DIV/0!	#DIV/0!	#DIV/0!
ath-miR2933b	#DIV/0!	#DIV/0!	#DIV/0!	#DIV/0!	#DIV/0!	#DIV/0!	#DIV/0!	#DIV/0!	#DIV/0!	#DIV/0!	#DIV/0!	#DIV/0!
ath-miR2934-3p	#DIV/0!	#DIV/0!	#DIV/0!	#DIV/0!	#DIV/0!	0	#DIV/0!	#DIV/0!	#DIV/0!	#DIV/0!	#DIV/0!	#DIV/0!
ath-miR2934-5p	0	0.5	0.25	0.353553	0	0	0	0	0	0	0	0
ath-miR2936	#DIV/0!	#DIV/0!	#DIV/0!	#DIV/0!	0	#DIV/0!	#DIV/0!	#DIV/0!	#DIV/0!	#DIV/0!	#DIV/0!	#DIV/0!
ath-miR2939	#DIV/0!	#DIV/0!	#DIV/0!	#DIV/0!	#DIV/0!	#DIV/0!	#DIV/0!	#DIV/0!	#DIV/0!	#DIV/0!	#DIV/0!	#DIV/0!
ath-miR319a	0.484549	0.434188	0.459368	0.035611	0.442626	0.445208	0.443917	0.00182565	0.296302	0.31201	0.304156	0.0111067
ath-miR319b	0.484549	0.434188	0.459368	0.035611	0.442626	0.445208	0.443917	0.00182565	0.296302	0.31201	0.304156	0.0111067
ath-miR319c	0.967638	0.971291	0.969464	0.00258319	0.946621	0.956641	0.951631	0.00708476	0.917795	0.917649	0.917722	0.000102819
ath-miR3434-3p	#DIV/0!	#DIV/0!	#DIV/0!	#DIV/0!	#DIV/0!	#DIV/0!	#DIV/0!	#DIV/0!	#DIV/0!	#DIV/0!	#DIV/0!	#DIV/0!
ath-miR3434-5p	#DIV/0!	#DIV/0!	#DIV/0!	#DIV/0!	#DIV/0!	#DIV/0!	#DIV/0!	#DIV/0!	#DIV/0!	#DIV/0!	#DIV/0!	#DIV/0!
ath-miR3440b-3p	0.333333	0.0967742	0.215054	0.167273	0.285714	0.142857	0.214286	0.101015	0.6	0.222222	0.411111	0.267129
ath-miR3440b-5p	#DIV/0!	0	#DIV/0!	#DIV/0!	0.2	0.0833333	0.141667	0.0824958	0.166667	0	0.0833335	0.117851
ath-miR390a-3p	0.377273	0.369158	0.373216	0.00573793	0.5	0.421053	0.460527	0.0558241	0.357143	0.571429	0.464286	0.151523
ath-miR390a-5p	0.185185	0.285714	0.23545	0.0710846	0.315789	0.235714	0.275752	0.0566218	0.246153	0.25	0.248077	0.00271999
ath-miR390b-3p	1	0.875	0.9375	0.0883885	1	1	1	1.11022e-16	1	1	1	0
ath-miR390b-5p	0.185185	0.285714	0.23545	0.0710846	0.315789	0.235714	0.275752	0.0566218	0.246153	0.25	0.248077	0.00271999
ath-miR391-3p	#DIV/0!	#DIV/0!	#DIV/0!	#DIV/0!	#DIV/0!	1	#DIV/0!	#DIV/0!	#DIV/0!	#DIV/0!	#DIV/0!	#DIV/0!
ath-miR391-5p	0.366667	0.376345	0.371506	0.00684348	0.316239	0.252797	0.284518	0.0448605	0.196825	0.245901	0.221363	0.0347017
ath-miR3932a	#DIV/0!	#DIV/0!	#DIV/0!	#DIV/0!	#DIV/0!	#DIV/0!	#DIV/0!	#DIV/0!	#DIV/0!	#DIV/0!	#DIV/0!	#DIV/0!
ath-miR3932b-3p	#DIV/0!	#DIV/0!	#DIV/0!	#DIV/0!	#DIV/0!	#DIV/0!	#DIV/0!	#DIV/0!	#DIV/0!	#DIV/0!	#DIV/0!	#DIV/0!
ath-miR3932b-5p	0.117102	0.130951	0.124027	0.00979258	0.167212	0.130748	0.14898	0.0257841	0.188492	0.20934	0.198916	0.0147418
ath-miR3933	#DIV/0!	#DIV/0!	#DIV/0!	#DIV/0!	#DIV/0!	#DIV/0!	#DIV/0!	#DIV/0!	#DIV/0!	#DIV/0!	#DIV/0!	#DIV/0!
ath-miR393a-3p	0	0.142857	0.0714286	0.101015	0	0.333333	0.166667	0.235702	0	0	0	0
ath-miR393a-5p	0.890785	0.917323	0.904054	0.0187651	0.887755	0.896296	0.892026	0.00603958	0.955947	0.948276	0.952111	0.00542439
ath-miR393b-3p	0.141631	0.100386	0.121008	0.0291646	0.201299	0.120112	0.160705	0.0574079	0.225564	0.185185	0.205375	0.0285521
ath-miR393b-5p	0.890785	0.917323	0.904054	0.0187651	0.887755	0.896296	0.892026	0.00603958	0.955947	0.948276	0.952111	0.00542439
ath-miR394a	0.225109	0.22063	0.222869	0.00316685	0.175029	0.144223	0.159626	0.0217828	0.207478	0.199386	0.203432	0.00572173
ath-miR394b-3p	#DIV/0!	#DIV/0!	#DIV/0!	#DIV/0!	#DIV/0!	#DIV/0!	#DIV/0!	#DIV/0!	#DIV/0!	#DIV/0!	#DIV/0!	#DIV/0!
ath-miR394b-5p	0.225109	0.22063	0.222869	0.00316685	0.175029	0.144223	0.159626	0.0217828	0.207478	0.199386	0.203432	0.00572173
ath-miR395a	0.099765	0.117594	0.10868	0.0126071	0.136145	0.0963649	0.116255	0.028129	0.124246	0.149648	0.136947	0.0179618
ath-miR395b	0.0913569	0.104367	0.0978618	0.00919929	0.155164	0.112397	0.133781	0.0302408	0.227748	0.20168	0.214714	0.0184329
ath-miR395c	0.0913569	0.104367	0.0978618	0.00919929	0.155164	0.112397	0.133781	0.0302408	0.227748	0.20168	0.214714	0.0184329
ath-miR395d	0.099765	0.117594	0.10868	0.0126071	0.136145	0.0963649	0.116255	0.028129	0.124246	0.149648	0.136947	0.0179618
ath-miR395e	0.099765	0.117594	0.10868	0.0126071	0.136145	0.0963649	0.116255	0.028129	0.124246	0.149648	0.136947	0.0179618
ath-miR395f	0.0913569	0.104367	0.0978618	0.00919929	0.155164	0.112397	0.133781	0.0302408	0.227748	0.20168	0.214714	0.0184329
ath-miR396a-3p	0.210686	0.247965	0.229326	0.0263599	0.366589	0.38309	0.37484	0.0116679	0.374604	0.371212	0.372908	0.00239834
ath-miR396a-5p	0.939859	0.967596	0.953727	0.0196125	0.924625	0.937146	0.930886	0.00885394	0.878876	0.863325	0.871101	0.0109961
ath-miR396b-3p	0.232793	0.229814	0.231304	0.00210655	0.297414	0.303502	0.300458	0.00430483	0.283261	0.276923	0.280092	0.00448178
ath-miR396b-5p	0.312051	0.294151	0.303101	0.0126567	0.260919	0.245649	0.253284	0.0107978	0.278713	0.296228	0.287471	0.0123848
ath-miR397a	0.895833	1	0.947917	0.0736571	0.985714	0.949458	0.967586	0.0256368	0.842105	0.795918	0.819012	0.0326592
ath-miR397b	0.416666	0.434783	0.425725	0.0128102	0.555556	0.4375	0.496528	0.0834776	0.415929	0.44898	0.432454	0.0233704
ath-miR398a-3p	0.922964	0.929329	0.926147	0.00450059	0.897475	0.913272	0.905373	0.0111699	0.909663	0.902348	0.906006	0.00517193
ath-miR398a-5p	#DIV/0!	#DIV/0!	#DIV/0!	#DIV/0!	#DIV/0!	#DIV/0!	#DIV/0!	#DIV/0!	#DIV/0!	#DIV/0!	#DIV/0!	#DIV/0!
ath-miR398b-3p	0.0696859	0.0704998	0.0700929	0.000575452	0.0927547	0.0725089	0.0826318	0.0143159	0.102098	0.109076	0.105587	0.00493389
ath-miR398b-5p	#DIV/0!	#DIV/0!	#DIV/0!	#DIV/0!	0	0	0	0	0	#DIV/0!	#DIV/0!	#DIV/0!
ath-miR398c-3p	0.0696859	0.0704998	0.0700929	0.000575452	0.0927547	0.0725089	0.0826318	0.0143159	0.102098	0.109076	0.105587	0.00493389
ath-miR398c-5p	#DIV/0!	#DIV/0!	#DIV/0!	#DIV/0!	0	0	0	0	0	#DIV/0!	#DIV/0!	#DIV/0!
ath-miR399a	0	0.666667	0.333333	0.471405	0	0.16	0.08	0.113137	0.333334	0.428571	0.380953	0.0673432
ath-miR399b	0.0610328	0.112903	0.086968	0.036678	0.132576	0.109722	0.121149	0.0161599	0.205479	0.20122	0.203349	0.00301207
ath-miR399c-3p	0.0610328	0.112903	0.086968	0.036678	0.132576	0.109722	0.121149	0.0161599	0.205479	0.20122	0.203349	0.00301207
ath-miR399c-5p	#DIV/0!	#DIV/0!	#DIV/0!	#DIV/0!	#DIV/0!	#DIV/0!	#DIV/0!	#DIV/0!	#DIV/0!	#DIV/0!	#DIV/0!	#DIV/0!
ath-miR399d	0	1	0.5	0.707107	#DIV/0!	0.357143	#DIV/0!	#DIV/0!	0.571429	0.307693	0.439561	0.18649
ath-miR399e	1	1	1	0	#DIV/0!	1	#DIV/0!	#DIV/0!	0.5	1	0.75	0.353553
ath-miR399f	#DIV/0!	1	#DIV/0!	#DIV/0!	0	0.428571	0.214286	0.303046	0.3	0.285714	0.292857	0.0101018
ath-miR400	1	0.571429	0.785714	0.303046	1	0.35	0.675	0.459619	0.5625	0.428572	0.495536	0.094701
ath-miR402	0.967391	0.99187	0.979631	0.017309	0.977273	0.971429	0.974351	0.00413243	0.944444	1	0.972222	0.0392838
ath-miR403-3p	0.462783	0.509222	0.486002	0.0328372	0.496857	0.465314	0.481085	0.0223042	0.520727	0.543988	0.532358	0.0164483
ath-miR403-5p	0.207006	0.197297	0.202152	0.0068654	0.270619	0.263402	0.26701	0.0051032	0.178572	0.130082	0.154327	0.034288
ath-miR404	#DIV/0!	#DIV/0!	#DIV/0!	#DIV/0!	1	1	1	0	1	1	1	0
ath-miR406	#DIV/0!	#DIV/0!	#DIV/0!	#DIV/0!	1	#DIV/0!	#DIV/0!	#DIV/0!	1	#DIV/0!	#DIV/0!	#DIV/0!
ath-miR408-3p	0.122288	0.138962	0.130625	0.0117903	0.165827	0.135987	0.150907	0.0210997	0.182311	0.189175	0.185743	0.00485395
ath-miR408-5p	0.16017	0.137794	0.148982	0.0158221	0.183522	0.183565	0.183543	3.01903e-05	0.179487	0.2	0.189744	0.014505
ath-miR419	#DIV/0!	#DIV/0!	#DIV/0!	#DIV/0!	#DIV/0!	#DIV/0!	#DIV/0!	#DIV/0!	1	#DIV/0!	#DIV/0!	#DIV/0!
ath-miR4221	#DIV/0!	0.6	#DIV/0!	#DIV/0!	0.5	0.333333	0.416667	0.117852	0.5	#DIV/0!	#DIV/0!	#DIV/0!
ath-miR4227	#DIV/0!	#DIV/0!	#DIV/0!	#DIV/0!	1	#DIV/0!	#DIV/0!	#DIV/0!	#DIV/0!	1	#DIV/0!	#DIV/0!
ath-miR4228-3p	0.470589	0.608696	0.539643	0.0976561	1	0.461538	0.730769	0.38075	0.5	0	0.25	0.353553
ath-miR4228-5p	#DIV/0!	#DIV/0!	#DIV/0!	#DIV/0!	1	#DIV/0!	#DIV/0!	#DIV/0!	#DIV/0!	#DIV/0!	#DIV/0!	#DIV/0!
ath-miR4239	#DIV/0!	#DIV/0!	#DIV/0!	#DIV/0!	#DIV/0!	#DIV/0!	#DIV/0!	#DIV/0!	#DIV/0!	#DIV/0!	#DIV/0!	#DIV/0!
ath-miR4243	#DIV/0!	#DIV/0!	#DIV/0!	#DIV/0!	#DIV/0!	0	#DIV/0!	#DIV/0!	1	#DIV/0!	#DIV/0!	#DIV/0!
ath-miR4245	#DIV/0!	#DIV/0!	#DIV/0!	#DIV/0!	0	#DIV/0!	#DIV/0!	#DIV/0!	#DIV/0!	#DIV/0!	#DIV/0!	#DIV/0!
ath-miR447a-3p	0.348712	0.395891	0.372302	0.0333603	0.620332	0.575895	0.598113	0.0314219	0.525974	0.591304	0.558639	0.0461957
ath-miR447a.2-3p	0.267241	0.211631	0.239436	0.0393222	0.261905	0.266911	0.264408	0.00353961	0.169518	0.14848	0.158999	0.0148765
ath-miR447b	0.348712	0.395891	0.372302	0.0333603	0.620332	0.575895	0.598113	0.0314219	0.525974	0.591304	0.558639	0.0461957
ath-miR447c-3p	#DIV/0!	#DIV/0!	#DIV/0!	#DIV/0!	#DIV/0!	1	#DIV/0!	#DIV/0!	#DIV/0!	#DIV/0!	#DIV/0!	#DIV/0!
ath-miR447c-5p	#DIV/0!	#DIV/0!	#DIV/0!	#DIV/0!	#DIV/0!	#DIV/0!	#DIV/0!	#DIV/0!	#DIV/0!	#DIV/0!	#DIV/0!	#DIV/0!
ath-miR472-3p	0.240414	0.203743	0.222078	0.0259308	0.237762	0.218009	0.227886	0.0139674	0.250412	0.249364	0.249888	0.000741044
ath-miR472-5p	0.5	#DIV/0!	#DIV/0!	#DIV/0!	0	0.5	0.25	0.353553	#DIV/0!	1	#DIV/0!	#DIV/0!
ath-miR5012	0.5	0.573248	0.536624	0.0517942	0.64574	0.672296	0.659018	0.0187786	0.294118	0.398148	0.346133	0.0735607
ath-miR5013	0	#DIV/0!	#DIV/0!	#DIV/0!	#DIV/0!	0	#DIV/0!	#DIV/0!	#DIV/0!	#DIV/0!	#DIV/0!	#DIV/0!
ath-miR5014a-3p	#DIV/0!	1	#DIV/0!	#DIV/0!	#DIV/0!	#DIV/0!	#DIV/0!	#DIV/0!	#DIV/0!	#DIV/0!	#DIV/0!	#DIV/0!
ath-miR5014a-5p	#DIV/0!	#DIV/0!	#DIV/0!	#DIV/0!	#DIV/0!	#DIV/0!	#DIV/0!	#DIV/0!	#DIV/0!	#DIV/0!	#DIV/0!	#DIV/0!
ath-miR5014b	#DIV/0!	#DIV/0!	#DIV/0!	#DIV/0!	#DIV/0!	#DIV/0!	#DIV/0!	#DIV/0!	#DIV/0!	#DIV/0!	#DIV/0!	#DIV/0!
ath-miR5019	#DIV/0!	#DIV/0!	#DIV/0!	#DIV/0!	#DIV/0!	0	#DIV/0!	#DIV/0!	#DIV/0!	#DIV/0!	#DIV/0!	#DIV/0!
ath-miR5020a	0.5	#DIV/0!	#DIV/0!	#DIV/0!	#DIV/0!	#DIV/0!	#DIV/0!	#DIV/0!	#DIV/0!	#DIV/0!	#DIV/0!	#DIV/0!
ath-miR5020b	#DIV/0!	#DIV/0!	#DIV/0!	#DIV/0!	#DIV/0!	#DIV/0!	#DIV/0!	#DIV/0!	#DIV/0!	#DIV/0!	#DIV/0!	#DIV/0!
ath-miR5020c	1	1	1	0	#DIV/0!	#DIV/0!	#DIV/0!	#DIV/0!	#DIV/0!	#DIV/0!	#DIV/0!	#DIV/0!
ath-miR5023	#DIV/0!	#DIV/0!	#DIV/0!	#DIV/0!	#DIV/0!	1	#DIV/0!	#DIV/0!	#DIV/0!	#DIV/0!	#DIV/0!	#DIV/0!
ath-miR5024-3p	0.209151	0.196429	0.20279	0.00899584	0.282051	0.192593	0.237322	0.0632567	0	0.285714	0.142857	0.20203
ath-miR5024-5p	#DIV/0!	#DIV/0!	#DIV/0!	#DIV/0!	#DIV/0!	#DIV/0!	#DIV/0!	#DIV/0!	#DIV/0!	#DIV/0!	#DIV/0!	#DIV/0!
ath-miR5026	0.15857	0.116666	0.137618	0.0296304	0.152	0.14188	0.14694	0.00715569	0.217803	0.223809	0.220806	0.00424723
ath-miR5027	#DIV/0!	1	#DIV/0!	#DIV/0!	#DIV/0!	#DIV/0!	#DIV/0!	#DIV/0!	0	#DIV/0!	#DIV/0!	#DIV/0!
ath-miR5028	1	0.285714	0.642857	0.505077	0.285714	0.583333	0.434524	0.210448	0.749999	0.2	0.474999	0.388908
ath-miR5029	#DIV/0!	#DIV/0!	#DIV/0!	#DIV/0!	#DIV/0!	#DIV/0!	#DIV/0!	#DIV/0!	#DIV/0!	#DIV/0!	#DIV/0!	#DIV/0!
ath-miR5595a	0	0	0	0	0	0.333334	0.166667	0.235703	#DIV/0!	0	#DIV/0!	#DIV/0!
ath-miR5629	0.583333	1	0.791667	0.294628	1	0.666667	0.833333	0.235702	0.4	1	0.7	0.424264
ath-miR5631	#DIV/0!	#DIV/0!	#DIV/0!	#DIV/0!	1	1	1	0	#DIV/0!	#DIV/0!	#DIV/0!	#DIV/0!
ath-miR5632-3p	0	1	0.5	0.707107	#DIV/0!	0	#DIV/0!	#DIV/0!	#DIV/0!	#DIV/0!	#DIV/0!	#DIV/0!
ath-miR5632-5p	0	#DIV/0!	#DIV/0!	#DIV/0!	#DIV/0!	0	#DIV/0!	#DIV/0!	0	1	0.5	0.707107
ath-miR5633	#DIV/0!	#DIV/0!	#DIV/0!	#DIV/0!	#DIV/0!	#DIV/0!	#DIV/0!	#DIV/0!	0	#DIV/0!	#DIV/0!	#DIV/0!
ath-miR5634	#DIV/0!	#DIV/0!	#DIV/0!	#DIV/0!	#DIV/0!	#DIV/0!	#DIV/0!	#DIV/0!	#DIV/0!	#DIV/0!	#DIV/0!	#DIV/0!
ath-miR5635a	#DIV/0!	#DIV/0!	#DIV/0!	#DIV/0!	#DIV/0!	#DIV/0!	#DIV/0!	#DIV/0!	#DIV/0!	#DIV/0!	#DIV/0!	#DIV/0!
ath-miR5635b	#DIV/0!	#DIV/0!	#DIV/0!	#DIV/0!	#DIV/0!	#DIV/0!	#DIV/0!	#DIV/0!	#DIV/0!	#DIV/0!	#DIV/0!	#DIV/0!
ath-miR5635c	#DIV/0!	#DIV/0!	#DIV/0!	#DIV/0!	#DIV/0!	#DIV/0!	#DIV/0!	#DIV/0!	#DIV/0!	#DIV/0!	#DIV/0!	#DIV/0!
ath-miR5635d	#DIV/0!	#DIV/0!	#DIV/0!	#DIV/0!	#DIV/0!	#DIV/0!	#DIV/0!	#DIV/0!	#DIV/0!	#DIV/0!	#DIV/0!	#DIV/0!
ath-miR5636	#DIV/0!	#DIV/0!	#DIV/0!	#DIV/0!	#DIV/0!	#DIV/0!	#DIV/0!	#DIV/0!	#DIV/0!	#DIV/0!	#DIV/0!	#DIV/0!
ath-miR5637	0	0.375	0.1875	0.265165	0.181818	0.242424	0.212121	0.0428552	0.1	0	0.0500001	0.0707108
ath-miR5638a	0	#DIV/0!	#DIV/0!	#DIV/0!	#DIV/0!	#DIV/0!	#DIV/0!	#DIV/0!	0	#DIV/0!	#DIV/0!	#DIV/0!
ath-miR5638b	#DIV/0!	#DIV/0!	#DIV/0!	#DIV/0!	0.5	0.285714	0.392857	0.151523	0	#DIV/0!	#DIV/0!	#DIV/0!
ath-miR5639-3p	#DIV/0!	#DIV/0!	#DIV/0!	#DIV/0!	#DIV/0!	#DIV/0!	#DIV/0!	#DIV/0!	#DIV/0!	#DIV/0!	#DIV/0!	#DIV/0!
ath-miR5639-5p	#DIV/0!	0	#DIV/0!	#DIV/0!	0	0.5	0.25	0.353553	0	0	0	0
ath-miR5640	0.903226	0.934783	0.919004	0.0223141	1	0.86	0.93	0.098995	0.400001	0.666667	0.533334	0.188561
ath-miR5641	0	0.5	0.25	0.353553	#DIV/0!	0.666666	#DIV/0!	#DIV/0!	#DIV/0!	1	#DIV/0!	#DIV/0!
ath-miR5642a	0.914634	0.934911	0.924773	0.0143384	0.978322	0.973863	0.976093	0.00315304	0.922437	0.93633	0.929384	0.00982324
ath-miR5642b	0.914634	0.934911	0.924773	0.0143384	0.978322	0.973863	0.976093	0.00315304	0.922437	0.93633	0.929384	0.00982324
ath-miR5643a	#DIV/0!	0	#DIV/0!	#DIV/0!	0	0.25	0.125	0.176777	#DIV/0!	#DIV/0!	#DIV/0!	#DIV/0!
ath-miR5643b	#DIV/0!	0	#DIV/0!	#DIV/0!	0	0.25	0.125	0.176777	#DIV/0!	#DIV/0!	#DIV/0!	#DIV/0!
ath-miR5644	#DIV/0!	0	#DIV/0!	#DIV/0!	#DIV/0!	#DIV/0!	#DIV/0!	#DIV/0!	#DIV/0!	#DIV/0!	#DIV/0!	#DIV/0!
ath-miR5645a	#DIV/0!	#DIV/0!	#DIV/0!	#DIV/0!	#DIV/0!	#DIV/0!	#DIV/0!	#DIV/0!	#DIV/0!	#DIV/0!	#DIV/0!	#DIV/0!
ath-miR5645b	#DIV/0!	#DIV/0!	#DIV/0!	#DIV/0!	#DIV/0!	#DIV/0!	#DIV/0!	#DIV/0!	#DIV/0!	#DIV/0!	#DIV/0!	#DIV/0!
ath-miR5645c	#DIV/0!	#DIV/0!	#DIV/0!	#DIV/0!	#DIV/0!	1	#DIV/0!	#DIV/0!	#DIV/0!	#DIV/0!	#DIV/0!	#DIV/0!
ath-miR5645d	#DIV/0!	#DIV/0!	#DIV/0!	#DIV/0!	#DIV/0!	#DIV/0!	#DIV/0!	#DIV/0!	#DIV/0!	#DIV/0!	#DIV/0!	#DIV/0!
ath-miR5645e	#DIV/0!	#DIV/0!	#DIV/0!	#DIV/0!	#DIV/0!	#DIV/0!	#DIV/0!	#DIV/0!	#DIV/0!	#DIV/0!	#DIV/0!	#DIV/0!
ath-miR5645f	#DIV/0!	#DIV/0!	#DIV/0!	#DIV/0!	#DIV/0!	#DIV/0!	#DIV/0!	#DIV/0!	#DIV/0!	#DIV/0!	#DIV/0!	#DIV/0!
ath-miR5646	#DIV/0!	#DIV/0!	#DIV/0!	#DIV/0!	#DIV/0!	#DIV/0!	#DIV/0!	#DIV/0!	#DIV/0!	#DIV/0!	#DIV/0!	#DIV/0!
ath-miR5647	1	1	1	0	1	1	1	1.57009e-16	1	#DIV/0!	#DIV/0!	#DIV/0!
ath-miR5648-3p	#DIV/0!	#DIV/0!	#DIV/0!	#DIV/0!	#DIV/0!	#DIV/0!	#DIV/0!	#DIV/0!	#DIV/0!	#DIV/0!	#DIV/0!	#DIV/0!
ath-miR5648-5p	0.285714	0.461539	0.373627	0.124327	0.461538	0.4375	0.449519	0.0169978	0.153846	0.285714	0.21978	0.0932447
ath-miR5649a	#DIV/0!	#DIV/0!	#DIV/0!	#DIV/0!	#DIV/0!	#DIV/0!	#DIV/0!	#DIV/0!	#DIV/0!	#DIV/0!	#DIV/0!	#DIV/0!
ath-miR5649b	#DIV/0!	#DIV/0!	#DIV/0!	#DIV/0!	#DIV/0!	#DIV/0!	#DIV/0!	#DIV/0!	#DIV/0!	#DIV/0!	#DIV/0!	#DIV/0!
ath-miR5650	0.119403	0.192308	0.155855	0.0515514	0.095238	0.140351	0.117794	0.0318996	0.18919	0.0434782	0.116334	0.103033
ath-miR5651	0.392857	0.415584	0.404221	0.0160703	0.461539	0.355373	0.408456	0.0750705	0.156249	0.16	0.158125	0.00265237
ath-miR5652	0.166667	0	0.0833333	0.117851	0.3125	0.172414	0.242457	0.0990557	0	0	0	0
ath-miR5653	1	0.954546	0.977273	0.0321411	1	1	1	0	1	#DIV/0!	#DIV/0!	#DIV/0!
ath-miR5654-3p	0.232628	0.200573	0.216601	0.0226665	0.246774	0.271104	0.258939	0.017204	0.214912	0.206704	0.210808	0.00580396
ath-miR5654-5p	#DIV/0!	#DIV/0!	#DIV/0!	#DIV/0!	#DIV/0!	0	#DIV/0!	#DIV/0!	#DIV/0!	#DIV/0!	#DIV/0!	#DIV/0!
ath-miR5655	#DIV/0!	#DIV/0!	#DIV/0!	#DIV/0!	#DIV/0!	#DIV/0!	#DIV/0!	#DIV/0!	#DIV/0!	#DIV/0!	#DIV/0!	#DIV/0!
ath-miR5656	#DIV/0!	#DIV/0!	#DIV/0!	#DIV/0!	#DIV/0!	0	#DIV/0!	#DIV/0!	0	#DIV/0!	#DIV/0!	#DIV/0!
ath-miR5657	1	1	1	0	0.666666	1	0.833333	0.235702	1	1	1	0
ath-miR5658	#DIV/0!	#DIV/0!	#DIV/0!	#DIV/0!	1	#DIV/0!	#DIV/0!	#DIV/0!	#DIV/0!	1	#DIV/0!	#DIV/0!
ath-miR5659	#DIV/0!	#DIV/0!	#DIV/0!	#DIV/0!	#DIV/0!	#DIV/0!	#DIV/0!	#DIV/0!	#DIV/0!	#DIV/0!	#DIV/0!	#DIV/0!
ath-miR5660	#DIV/0!	#DIV/0!	#DIV/0!	#DIV/0!	#DIV/0!	1	#DIV/0!	#DIV/0!	#DIV/0!	#DIV/0!	#DIV/0!	#DIV/0!
ath-miR5661	#DIV/0!	#DIV/0!	#DIV/0!	#DIV/0!	#DIV/0!	#DIV/0!	#DIV/0!	#DIV/0!	#DIV/0!	#DIV/0!	#DIV/0!	#DIV/0!
ath-miR5662	#DIV/0!	#DIV/0!	#DIV/0!	#DIV/0!	#DIV/0!	#DIV/0!	#DIV/0!	#DIV/0!	#DIV/0!	#DIV/0!	#DIV/0!	#DIV/0!
ath-miR5663-3p	#DIV/0!	#DIV/0!	#DIV/0!	#DIV/0!	0	#DIV/0!	#DIV/0!	#DIV/0!	#DIV/0!	#DIV/0!	#DIV/0!	#DIV/0!
ath-miR5663-5p	#DIV/0!	#DIV/0!	#DIV/0!	#DIV/0!	#DIV/0!	#DIV/0!	#DIV/0!	#DIV/0!	0	#DIV/0!	#DIV/0!	#DIV/0!
ath-miR5664	#DIV/0!	#DIV/0!	#DIV/0!	#DIV/0!	#DIV/0!	#DIV/0!	#DIV/0!	#DIV/0!	#DIV/0!	#DIV/0!	#DIV/0!	#DIV/0!
ath-miR5665	1	#DIV/0!	#DIV/0!	#DIV/0!	1	#DIV/0!	#DIV/0!	#DIV/0!	#DIV/0!	#DIV/0!	#DIV/0!	#DIV/0!
ath-miR5666	#DIV/0!	#DIV/0!	#DIV/0!	#DIV/0!	#DIV/0!	#DIV/0!	#DIV/0!	#DIV/0!	#DIV/0!	#DIV/0!	#DIV/0!	#DIV/0!
ath-miR5995b	0	0	0	0	0	0.333334	0.166667	0.235703	#DIV/0!	0	#DIV/0!	#DIV/0!
ath-miR5996	0.562617	0.419925	0.491271	0.100898	0.341176	0.440337	0.390757	0.0701171	0.348259	0.381356	0.364807	0.0234034
ath-miR5997	0	#DIV/0!	#DIV/0!	#DIV/0!	0	0	0	0	#DIV/0!	1	#DIV/0!	#DIV/0!
ath-miR5998a	#DIV/0!	#DIV/0!	#DIV/0!	#DIV/0!	#DIV/0!	#DIV/0!	#DIV/0!	#DIV/0!	#DIV/0!	#DIV/0!	#DIV/0!	#DIV/0!
ath-miR5998b	#DIV/0!	#DIV/0!	#DIV/0!	#DIV/0!	#DIV/0!	#DIV/0!	#DIV/0!	#DIV/0!	#DIV/0!	#DIV/0!	#DIV/0!	#DIV/0!
ath-miR5999	1	#DIV/0!	#DIV/0!	#DIV/0!	#DIV/0!	0	#DIV/0!	#DIV/0!	#DIV/0!	#DIV/0!	#DIV/0!	#DIV/0!
ath-miR771	1	0.833334	0.916667	0.117851	1	0.727273	0.863636	0.192847	0.799999	0.333333	0.566666	0.329983
ath-miR773a	0.906667	0.861538	0.884103	0.0319106	0.909341	0.910385	0.909863	0.000738604	0.901907	0.897891	0.899899	0.00283996
ath-miR773b-3p	1	#DIV/0!	#DIV/0!	#DIV/0!	1	1	1	0	0.5	#DIV/0!	#DIV/0!	#DIV/0!
ath-miR774a	#DIV/0!	#DIV/0!	#DIV/0!	#DIV/0!	#DIV/0!	#DIV/0!	#DIV/0!	#DIV/0!	#DIV/0!	#DIV/0!	#DIV/0!	#DIV/0!
ath-miR775	0.862092	0.858696	0.860394	0.00240115	0.370761	0.472707	0.421734	0.0720866	0.598902	0.53438	0.566641	0.0456238
ath-miR776	#DIV/0!	#DIV/0!	#DIV/0!	#DIV/0!	#DIV/0!	#DIV/0!	#DIV/0!	#DIV/0!	#DIV/0!	#DIV/0!	#DIV/0!	#DIV/0!
ath-miR777	#DIV/0!	#DIV/0!	#DIV/0!	#DIV/0!	0	0.1	0.05	0.0707107	0.297297	0.227273	0.262285	0.0495144
ath-miR778	#DIV/0!	#DIV/0!	#DIV/0!	#DIV/0!	#DIV/0!	#DIV/0!	#DIV/0!	#DIV/0!	#DIV/0!	#DIV/0!	#DIV/0!	#DIV/0!
ath-miR779.1	1	1	1	0	1	0.931035	0.965517	0.048766	0.909091	0.923077	0.916084	0.00988964
ath-miR779.2	0.136364	0.205882	0.171123	0.0491569	0.166667	0.162791	0.164729	0.0027406	0.225	0.2	0.2125	0.0176778
ath-miR780.1	0.235295	0.181818	0.208556	0.0378136	0	0.214286	0.107143	0.151523	0.5	0	0.25	0.353553
ath-miR780.2	0.5	1	0.75	0.353553	0.5	0.25	0.375	0.176777	0	0	0	0
ath-miR781a	0.489247	0.516209	0.502728	0.0190655	0.452941	0.446465	0.449703	0.00457968	0.490991	0.442953	0.466972	0.033968
ath-miR781b	0.489247	0.516209	0.502728	0.0190655	0.452941	0.446465	0.449703	0.00457968	0.490991	0.442953	0.466972	0.033968
ath-miR782	#DIV/0!	#DIV/0!	#DIV/0!	#DIV/0!	#DIV/0!	#DIV/0!	#DIV/0!	#DIV/0!	#DIV/0!	#DIV/0!	#DIV/0!	#DIV/0!
ath-miR8121	#DIV/0!	#DIV/0!	#DIV/0!	#DIV/0!	#DIV/0!	#DIV/0!	#DIV/0!	#DIV/0!	#DIV/0!	#DIV/0!	#DIV/0!	#DIV/0!
ath-miR8165	#DIV/0!	#DIV/0!	#DIV/0!	#DIV/0!	#DIV/0!	#DIV/0!	#DIV/0!	#DIV/0!	#DIV/0!	#DIV/0!	#DIV/0!	#DIV/0!
ath-miR8166	#DIV/0!	#DIV/0!	#DIV/0!	#DIV/0!	1	#DIV/0!	#DIV/0!	#DIV/0!	#DIV/0!	#DIV/0!	#DIV/0!	#DIV/0!
ath-miR8167a	#DIV/0!	#DIV/0!	#DIV/0!	#DIV/0!	#DIV/0!	#DIV/0!	#DIV/0!	#DIV/0!	#DIV/0!	#DIV/0!	#DIV/0!	#DIV/0!
ath-miR8167b	#DIV/0!	#DIV/0!	#DIV/0!	#DIV/0!	#DIV/0!	#DIV/0!	#DIV/0!	#DIV/0!	#DIV/0!	#DIV/0!	#DIV/0!	#DIV/0!
ath-miR8167c	#DIV/0!	#DIV/0!	#DIV/0!	#DIV/0!	#DIV/0!	#DIV/0!	#DIV/0!	#DIV/0!	#DIV/0!	#DIV/0!	#DIV/0!	#DIV/0!
ath-miR8167d	#DIV/0!	#DIV/0!	#DIV/0!	#DIV/0!	#DIV/0!	#DIV/0!	#DIV/0!	#DIV/0!	#DIV/0!	#DIV/0!	#DIV/0!	#DIV/0!
ath-miR8167e	#DIV/0!	#DIV/0!	#DIV/0!	#DIV/0!	#DIV/0!	#DIV/0!	#DIV/0!	#DIV/0!	#DIV/0!	#DIV/0!	#DIV/0!	#DIV/0!
ath-miR8167f	#DIV/0!	#DIV/0!	#DIV/0!	#DIV/0!	#DIV/0!	#DIV/0!	#DIV/0!	#DIV/0!	#DIV/0!	#DIV/0!	#DIV/0!	#DIV/0!
ath-miR8168	#DIV/0!	#DIV/0!	#DIV/0!	#DIV/0!	#DIV/0!	1	#DIV/0!	#DIV/0!	#DIV/0!	#DIV/0!	#DIV/0!	#DIV/0!
ath-miR8169	#DIV/0!	#DIV/0!	#DIV/0!	#DIV/0!	#DIV/0!	#DIV/0!	#DIV/0!	#DIV/0!	0	#DIV/0!	#DIV/0!	#DIV/0!
ath-miR8170-3p	0.75	1	0.875	0.176777	#DIV/0!	0.5	#DIV/0!	#DIV/0!	0	#DIV/0!	#DIV/0!	#DIV/0!
ath-miR8170-5p	#DIV/0!	#DIV/0!	#DIV/0!	#DIV/0!	#DIV/0!	#DIV/0!	#DIV/0!	#DIV/0!	#DIV/0!	#DIV/0!	#DIV/0!	#DIV/0!
ath-miR8171	#DIV/0!	#DIV/0!	#DIV/0!	#DIV/0!	1	#DIV/0!	#DIV/0!	#DIV/0!	#DIV/0!	#DIV/0!	#DIV/0!	#DIV/0!
ath-miR8172	#DIV/0!	#DIV/0!	#DIV/0!	#DIV/0!	#DIV/0!	#DIV/0!	#DIV/0!	#DIV/0!	#DIV/0!	#DIV/0!	#DIV/0!	#DIV/0!
ath-miR8173	#DIV/0!	#DIV/0!	#DIV/0!	#DIV/0!	#DIV/0!	#DIV/0!	#DIV/0!	#DIV/0!	#DIV/0!	#DIV/0!	#DIV/0!	#DIV/0!
ath-miR8174	#DIV/0!	#DIV/0!	#DIV/0!	#DIV/0!	#DIV/0!	#DIV/0!	#DIV/0!	#DIV/0!	#DIV/0!	#DIV/0!	#DIV/0!	#DIV/0!
ath-miR8175	#DIV/0!	#DIV/0!	#DIV/0!	#DIV/0!	#DIV/0!	#DIV/0!	#DIV/0!	#DIV/0!	#DIV/0!	#DIV/0!	#DIV/0!	#DIV/0!
ath-miR8177	#DIV/0!	#DIV/0!	#DIV/0!	#DIV/0!	#DIV/0!	#DIV/0!	#DIV/0!	#DIV/0!	#DIV/0!	#DIV/0!	#DIV/0!	#DIV/0!
ath-miR8178	#DIV/0!	#DIV/0!	#DIV/0!	#DIV/0!	#DIV/0!	#DIV/0!	#DIV/0!	#DIV/0!	#DIV/0!	#DIV/0!	#DIV/0!	#DIV/0!
ath-miR8179	#DIV/0!	0.25	#DIV/0!	#DIV/0!	0.4	0.111111	0.255555	0.204275	0.666667	0.5	0.583333	0.117851
ath-miR8180	1	#DIV/0!	#DIV/0!	#DIV/0!	1	0.333334	0.666667	0.471404	#DIV/0!	#DIV/0!	#DIV/0!	#DIV/0!
ath-miR8181	#DIV/0!	#DIV/0!	#DIV/0!	#DIV/0!	#DIV/0!	#DIV/0!	#DIV/0!	#DIV/0!	#DIV/0!	#DIV/0!	#DIV/0!	#DIV/0!
ath-miR8182	0.272728	0.222223	0.247475	0.0357124	0.333333	0.28	0.306666	0.0377123	0.333333	0	0.166667	0.235702
ath-miR8183	0.471698	0.302325	0.387012	0.119765	0.294118	0.375	0.334559	0.0571925	0.272728	0.375	0.323864	0.0723172
ath-miR8184	1	1	1	0	0	1	0.5	0.707107	#DIV/0!	0	#DIV/0!	#DIV/0!
ath-miR822-3p	0.676471	0.640001	0.658236	0.0257883	0.31579	0.369231	0.342511	0.0377887	0.301887	0.358974	0.330431	0.0403669
ath-miR822-5p	0.216981	0.358209	0.287595	0.0998629	0.301887	0.242254	0.27207	0.0421669	0.256693	0.292784	0.274738	0.02552
ath-miR823	0.444444	0.390671	0.417558	0.0380236	0.264	0.308411	0.286205	0.0314033	0.270834	0.210526	0.24068	0.0426437
ath-miR824-3p	0.5	0	0.25	0.353553	0.4	0.25	0.325	0.106066	0.6	0.111111	0.355555	0.345697
ath-miR824-5p	0.209877	0.216419	0.213148	0.00462573	0.403509	0.24031	0.321909	0.115399	0.205479	0.201613	0.203546	0.00273414
ath-miR825	0.145901	0.140146	0.143024	0.00406971	0.0767195	0.0884173	0.0825684	0.0082716	0.0912473	0.0813647	0.086306	0.00698809
ath-miR826a	#DIV/0!	0	#DIV/0!	#DIV/0!	#DIV/0!	#DIV/0!	#DIV/0!	#DIV/0!	0	0	0	0
ath-miR826b	#DIV/0!	#DIV/0!	#DIV/0!	#DIV/0!	#DIV/0!	#DIV/0!	#DIV/0!	#DIV/0!	#DIV/0!	#DIV/0!	#DIV/0!	#DIV/0!
ath-miR827	0.307693	0.315789	0.311741	0.00572461	0.625	0.454545	0.539773	0.12053	0.25	0.461538	0.355769	0.14958
ath-miR828	0	0.333333	0.166666	0.235702	1	0.636364	0.818182	0.25713	0.599999	0	0.299999	0.424263
ath-miR829-3p.1	#DIV/0!	#DIV/0!	#DIV/0!	#DIV/0!	#DIV/0!	#DIV/0!	#DIV/0!	#DIV/0!	0	#DIV/0!	#DIV/0!	#DIV/0!
ath-miR829-3p.2	0.5	0.125	0.3125	0.265165	0.5	0.1	0.3	0.282843	0	0	0	0
ath-miR829-5p	0	0.6	0.3	0.424264	0	0	0	0	0.833333	0.5	0.666666	0.235702
ath-miR830-3p	#DIV/0!	0	#DIV/0!	#DIV/0!	#DIV/0!	0	#DIV/0!	#DIV/0!	#DIV/0!	0.333333	#DIV/0!	#DIV/0!
ath-miR830-5p	0	0	0	0	0	0.333334	0.166667	0.235703	#DIV/0!	0.5	#DIV/0!	#DIV/0!
ath-miR831-3p	0.0487805	0.0723353	0.0605579	0.0166558	0.0952381	0.0351759	0.065207	0.0424704	0.0454546	0.0769231	0.0611888	0.0222516
ath-miR831-5p	#DIV/0!	#DIV/0!	#DIV/0!	#DIV/0!	#DIV/0!	#DIV/0!	#DIV/0!	#DIV/0!	#DIV/0!	#DIV/0!	#DIV/0!	#DIV/0!
ath-miR832-3p	#DIV/0!	#DIV/0!	#DIV/0!	#DIV/0!	#DIV/0!	#DIV/0!	#DIV/0!	#DIV/0!	#DIV/0!	#DIV/0!	#DIV/0!	#DIV/0!
ath-miR832-5p	#DIV/0!	#DIV/0!	#DIV/0!	#DIV/0!	#DIV/0!	#DIV/0!	#DIV/0!	#DIV/0!	#DIV/0!	#DIV/0!	#DIV/0!	#DIV/0!
ath-miR833a-3p	#DIV/0!	0	#DIV/0!	#DIV/0!	1	1	1	0	#DIV/0!	#DIV/0!	#DIV/0!	#DIV/0!
ath-miR833a-5p	0.336734	0.26087	0.298802	0.0536444	0.404762	0.518072	0.461417	0.0801228	0.448276	0.625	0.536638	0.124963
ath-miR833b	0.333333	0.125	0.229167	0.147313	1	0.333333	0.666667	0.471405	0.363637	0.5	0.431818	0.0964233
ath-miR834	#DIV/0!	0	#DIV/0!	#DIV/0!	1	0	0.5	0.707107	#DIV/0!	#DIV/0!	#DIV/0!	#DIV/0!
ath-miR835-3p	0	0	0	0	#DIV/0!	1	#DIV/0!	#DIV/0!	#DIV/0!	#DIV/0!	#DIV/0!	#DIV/0!
ath-miR835-5p	0	#DIV/0!	#DIV/0!	#DIV/0!	#DIV/0!	0	#DIV/0!	#DIV/0!	0	0	0	0
ath-miR836	#DIV/0!	#DIV/0!	#DIV/0!	#DIV/0!	1	1	1	0	#DIV/0!	#DIV/0!	#DIV/0!	#DIV/0!
ath-miR837-3p	#DIV/0!	0	#DIV/0!	#DIV/0!	0.5	0.4	0.45	0.0707108	#DIV/0!	#DIV/0!	#DIV/0!	#DIV/0!
ath-miR837-5p	1	0	0.5	0.707107	0	0	0	0	#DIV/0!	0	#DIV/0!	#DIV/0!
ath-miR838	0.277228	0.211764	0.244496	0.0462896	0.153846	0.215384	0.184615	0.0435141	0.146067	0.104478	0.125273	0.0294082
ath-miR839-5p	0.0909091	0.125	0.107955	0.0241059	0.142857	0.147959	0.145408	0.00360772	0.185185	0.232559	0.208872	0.033498
ath-miR840-3p	0.638554	0.697675	0.668114	0.0418042	0.780953	0.683603	0.732278	0.0688367	0.641792	0.747475	0.694633	0.0747293
ath-miR840-5p	0.666667	0.5	0.583334	0.117851	0.5	0.625	0.5625	0.0883883	1	0	0.5	0.707107
ath-miR841a-3p	0.72	0.5	0.61	0.155563	0.529412	0.391999	0.460705	0.0971655	0.555556	0.6	0.577778	0.031427
ath-miR841a-5p	0.5	0.421053	0.460526	0.055824	0.625	0.463158	0.544079	0.114439	0.439025	0.387097	0.413061	0.0367181
ath-miR841b-3p	0.0660379	0.070707	0.0683725	0.00330152	0.2	0.0985917	0.149296	0.0717066	0.125	0	0.0625001	0.0883885
ath-miR841b-5p	0.428572	0.285714	0.357143	0.101016	0.4	0.25	0.325	0.106066	0.749999	0.5	0.625	0.176776
ath-miR842	0.199999	0.538462	0.36923	0.239329	0.533333	0.615385	0.574359	0.0580191	0.444444	0.636364	0.540404	0.135708
ath-miR843	0.0907006	0.064429	0.0775648	0.0185768	0.156069	0.144606	0.150338	0.00810588	0.208955	0.256098	0.232526	0.0333349
ath-miR844-3p	0.75	0.5	0.625	0.176777	0.125	0.333333	0.229167	0.147314	0.5	0.307693	0.403846	0.135982
ath-miR844-5p	#DIV/0!	#DIV/0!	#DIV/0!	#DIV/0!	#DIV/0!	0	#DIV/0!	#DIV/0!	0	#DIV/0!	#DIV/0!	#DIV/0!
ath-miR845a	0.0531377	0.0570104	0.0550741	0.00273839	0.0655022	0.0507996	0.0581509	0.0103963	0.0716611	0.092683	0.082172	0.0148648
ath-miR845b	0.111111	0.144928	0.12802	0.0239119	0	0.0645161	0.032258	0.0456198	0.5	0	0.25	0.353553
ath-miR846-3p	0.118308	0.110686	0.114497	0.00538974	0.155158	0.12939	0.142274	0.0182204	0.0936818	0.104039	0.0988605	0.00732375
ath-miR846-5p	0.511278	0.497487	0.504382	0.00975184	0.747748	0.592834	0.670291	0.109541	0.355556	0.342105	0.348831	0.00951108
ath-miR847	0.245614	0.232558	0.239086	0.00923214	0.194444	0.243902	0.219173	0.034972	0.191489	0.194444	0.192967	0.00208933
ath-miR848	0.59375	0.447369	0.520559	0.103507	0.440476	0.46875	0.454613	0.0199927	0.568627	0.482759	0.525693	0.0607182
ath-miR849	#DIV/0!	#DIV/0!	#DIV/0!	#DIV/0!	#DIV/0!	#DIV/0!	#DIV/0!	#DIV/0!	#DIV/0!	#DIV/0!	#DIV/0!	#DIV/0!
ath-miR850	0.685143	0.739112	0.712128	0.0381622	0.830357	0.840263	0.83531	0.00700423	0.666666	0.534246	0.600456	0.0936357
ath-miR851-3p	0	0	0	0	#DIV/0!	0	#DIV/0!	#DIV/0!	#DIV/0!	#DIV/0!	#DIV/0!	#DIV/0!
ath-miR851-5p	0.666667	1	0.833334	0.235702	1	0.75	0.875	0.176777	0.5	1	0.75	0.353553
ath-miR852	#DIV/0!	#DIV/0!	#DIV/0!	#DIV/0!	0	0.125	0.0625	0.0883883	0	0	0	0
ath-miR853	0.666667	0.5	0.583334	0.117851	0.5	0.642857	0.571429	0.101015	0.727273	0.444444	0.585858	0.19999
ath-miR855	#DIV/0!	#DIV/0!	#DIV/0!	#DIV/0!	#DIV/0!	#DIV/0!	#DIV/0!	#DIV/0!	#DIV/0!	#DIV/0!	#DIV/0!	#DIV/0!
ath-miR856	#DIV/0!	#DIV/0!	#DIV/0!	#DIV/0!	#DIV/0!	1	#DIV/0!	#DIV/0!	#DIV/0!	#DIV/0!	#DIV/0!	#DIV/0!
ath-miR857	0.470588	0.367647	0.419118	0.0727905	0.536585	0.471311	0.503948	0.0461559	0.434783	0.325	0.379891	0.0776281
ath-miR858a	0.395939	0.380847	0.388393	0.0106719	0.401006	0.417598	0.409302	0.0117317	0.358053	0.35857	0.358312	0.000365163
ath-miR858b	0.36	0.392308	0.376154	0.0228457	0.266055	0.273128	0.269592	0.00500106	0.235796	0.212624	0.22421	0.0163846
ath-miR859	0.8	0.5	0.65	0.212132	0.8	0.5625	0.68125	0.167938	0.400001	0.5	0.450001	0.0707099
ath-miR860	0.2	0.368421	0.28421	0.119092	0.5	0.636364	0.568182	0.0964238	0.5	0.499999	0.5	5.24813e-07
ath-miR861-3p	#DIV/0!	#DIV/0!	#DIV/0!	#DIV/0!	#DIV/0!	#DIV/0!	#DIV/0!	#DIV/0!	#DIV/0!	#DIV/0!	#DIV/0!	#DIV/0!
ath-miR861-5p	#DIV/0!	#DIV/0!	#DIV/0!	#DIV/0!	#DIV/0!	#DIV/0!	#DIV/0!	#DIV/0!	#DIV/0!	#DIV/0!	#DIV/0!	#DIV/0!
ath-miR862-3p	#DIV/0!	#DIV/0!	#DIV/0!	#DIV/0!	#DIV/0!	#DIV/0!	#DIV/0!	#DIV/0!	#DIV/0!	#DIV/0!	#DIV/0!	#DIV/0!
ath-miR862-5p	0.350001	0.225806	0.287904	0.0878185	0.230769	0.172414	0.201592	0.0412632	0.263157	0.0833333	0.173245	0.127155
ath-miR863-3p	0	0	0	0	0.6	0.444444	0.522222	0.109995	0.25	0	0.125	0.176777
ath-miR863-5p	0.555555	0.503597	0.529576	0.0367404	0.288889	0.380531	0.33471	0.0648005	0.190476	0.344828	0.267652	0.109143
ath-miR864-3p	#DIV/0!	#DIV/0!	#DIV/0!	#DIV/0!	#DIV/0!	#DIV/0!	#DIV/0!	#DIV/0!	#DIV/0!	1	#DIV/0!	#DIV/0!
ath-miR864-5p	0	0.307693	0.153846	0.217572	0.714286	0.6	0.657143	0.080812	0.5	0.4	0.45	0.0707107
ath-miR865-3p	#DIV/0!	#DIV/0!	#DIV/0!	#DIV/0!	#DIV/0!	#DIV/0!	#DIV/0!	#DIV/0!	#DIV/0!	1	#DIV/0!	#DIV/0!
ath-miR865-5p	0	#DIV/0!	#DIV/0!	#DIV/0!	0	0	0	0	#DIV/0!	0	#DIV/0!	#DIV/0!
ath-miR866-3p	0.5	0	0.25	0.353553	#DIV/0!	1	#DIV/0!	#DIV/0!	#DIV/0!	#DIV/0!	#DIV/0!	#DIV/0!
ath-miR866-5p	1	1	1	0	1	0.866667	0.933333	0.0942808	0.857143	1	0.928571	0.101015
ath-miR868-3p	#DIV/0!	#DIV/0!	#DIV/0!	#DIV/0!	#DIV/0!	#DIV/0!	#DIV/0!	#DIV/0!	#DIV/0!	#DIV/0!	#DIV/0!	#DIV/0!
ath-miR868-5p	0	0	0	0	#DIV/0!	0.5	#DIV/0!	#DIV/0!	0	0.5	0.25	0.353553
ath-miR869.1	#DIV/0!	#DIV/0!	#DIV/0!	#DIV/0!	0	#DIV/0!	#DIV/0!	#DIV/0!	0	#DIV/0!	#DIV/0!	#DIV/0!
ath-miR869.2	0.929672	0.908979	0.919325	0.0146324	0.519685	0.592879	0.556282	0.051756	0.275862	0.170732	0.223297	0.0743379
ath-miR870-3p	0	0	0	0	0.2	0	0.1	0.141421	#DIV/0!	0	#DIV/0!	#DIV/0!
ath-miR870-5p	1	#DIV/0!	#DIV/0!	#DIV/0!	#DIV/0!	#DIV/0!	#DIV/0!	#DIV/0!	#DIV/0!	#DIV/0!	#DIV/0!	#DIV/0!
miR156ij	0.563637	0.587302	0.575469	0.0167337	0.882353	0.674158	0.778255	0.147216	0.761905	0.636364	0.699135	0.088771
miR159a-c	0.284897	0.247256	0.266077	0.0266159	0.379688	0.35614	0.367914	0.0166508	0.424319	0.421018	0.422669	0.00233445
miR167abd	0.465894	0.449782	0.457838	0.0113926	0.548157	0.649538	0.598848	0.0716868	0.660641	0.667835	0.664238	0.00508716
miR169a-c	1	1	1	0	0.8125	0.833333	0.822917	0.0147314	0.6	0.7	0.65	0.0707106
miR172a-d	0.210526	0.214286	0.212406	0.00265824	0.242187	0.228	0.235094	0.0100319	0.262136	0.316667	0.289401	0.0385594
miR319a-c	0.847769	0.862874	0.855322	0.0106809	0.759649	0.765725	0.762687	0.00429631	0.588902	0.596766	0.592834	0.00556037
miR395a-f	0.0917707	0.10484	0.0983056	0.00924168	0.141013	0.100135	0.120574	0.0289051	0.147746	0.1598	0.153773	0.00852332
miR396ab	0.360167	0.347801	0.353984	0.00874411	0.31715	0.294778	0.305964	0.0158197	0.342961	0.361235	0.352098	0.0129214
miR398a-c	0.125376	0.128213	0.126795	0.00200588	0.159938	0.126044	0.142991	0.0239662	0.175354	0.188039	0.181696	0.00896978
miR399a-f	0.0639269	0.120729	0.0923279	0.0401652	0.12963	0.116492	0.123061	0.00928962	0.213836	0.21164	0.212738	0.00155284

## Sheet: AGO1 IP-Ratio-TR-only
S4 Data. Composition of miRNA forms in AGO1 and AGO10 IP treated with SDN1 and SDN1 catalytic mutant (SDN1-D283A).
	AGO1 IP (Mock)				AGO1 IP (SDN1)				AGO1 IP (SDN1-D283A)
miRNAs	br1	br2	Mean	Stdev	br1	br2	Mean	Stdev	br1	br2	Mean	Stdev
ath-miR156a-3p	0.5	0.5	0.5	0	0.25	0	0.125	0.176777	0.250001	#DIV/0!	#DIV/0!	#DIV/0!
ath-miR156a-5p	0.206036	0.180672	0.193354	0.0179347	0.337332	0.349165	0.343248	0.00836729	0.351234	0.344985	0.348109	0.00441849
ath-miR156b-3p	0.822481	0.822535	0.822508	3.84341e-05	0.346736	0.440384	0.39356	0.0662189	0.188323	0.174078	0.181201	0.010073
ath-miR156b-5p	0.206036	0.180672	0.193354	0.0179347	0.337332	0.349165	0.343248	0.00836729	0.351234	0.344985	0.348109	0.00441849
ath-miR156c-3p	1	0	0.5	0.707107	#DIV/0!	0	#DIV/0!	#DIV/0!	0	0	0	0
ath-miR156c-5p	0.206036	0.180672	0.193354	0.0179347	0.337332	0.349165	0.343248	0.00836729	0.351234	0.344985	0.348109	0.00441849
ath-miR156d-3p	#DIV/0!	#DIV/0!	#DIV/0!	#DIV/0!	#DIV/0!	#DIV/0!	#DIV/0!	#DIV/0!	#DIV/0!	#DIV/0!	#DIV/0!	#DIV/0!
ath-miR156d-5p	0.206036	0.180672	0.193354	0.0179347	0.337332	0.349165	0.343248	0.00836729	0.351234	0.344985	0.348109	0.00441849
ath-miR156e	0.206036	0.180672	0.193354	0.0179347	0.337332	0.349165	0.343248	0.00836729	0.351234	0.344985	0.348109	0.00441849
ath-miR156f-3p	#DIV/0!	#DIV/0!	#DIV/0!	#DIV/0!	#DIV/0!	#DIV/0!	#DIV/0!	#DIV/0!	#DIV/0!	#DIV/0!	#DIV/0!	#DIV/0!
ath-miR156f-5p	0.206036	0.180672	0.193354	0.0179347	0.337332	0.349165	0.343248	0.00836729	0.351234	0.344985	0.348109	0.00441849
ath-miR156g	0.202454	0.225108	0.213781	0.016019	0.367647	0.332089	0.349868	0.0251431	0.342105	0.371429	0.356767	0.0207348
ath-miR156h	0.5	0.428571	0.464286	0.0505078	0	0.333333	0.166667	0.235702	0.2	0.5	0.35	0.212132
ath-miR156i	0.666666	0.52381	0.595238	0.101015	0.75	0.749999	0.75	6.5205e-07	0.714286	0.666667	0.690476	0.0336718
ath-miR156j	0.291667	0.207547	0.249607	0.0594819	0.4	0.428571	0.414285	0.0202025	0.476191	0.363636	0.419913	0.0795882
ath-miR157a-3p	0.0714286	0	0.0357143	0.0505076	0.0833333	0.125	0.104167	0.0294628	0.25	0	0.125	0.176777
ath-miR157a-5p	0.437665	0.440162	0.438913	0.00176573	0.46161	0.513014	0.487312	0.0363481	0.42494	0.40445	0.414695	0.0144887
ath-miR157b-3p	0.0714286	0	0.0357143	0.0505076	0.0833333	0.125	0.104167	0.0294628	0.25	0	0.125	0.176777
ath-miR157b-5p	0.437665	0.440162	0.438913	0.00176573	0.46161	0.513014	0.487312	0.0363481	0.42494	0.40445	0.414695	0.0144887
ath-miR157c-3p	0.131035	0.129032	0.130033	0.00141604	0.383333	0.182432	0.282883	0.142058	0.129032	0.157895	0.143464	0.020409
ath-miR157c-5p	0.437665	0.440162	0.438913	0.00176573	0.46161	0.513014	0.487312	0.0363481	0.42494	0.40445	0.414695	0.0144887
ath-miR157d	0.321429	0.324706	0.323067	0.00231758	0.327189	0.448399	0.387794	0.0857081	0.318181	0.349398	0.33379	0.0220731
ath-miR158a-3p	0.309786	0.335986	0.322886	0.018526	0.507849	0.482497	0.495173	0.0179264	0.243991	0.229214	0.236603	0.0104489
ath-miR158a-5p	0.010101	0.0112994	0.0107002	0.000847401	0.0350877	0.0357143	0.035401	0.000443096	0.0333333	0.0434782	0.0384058	0.00717351
ath-miR158b	0.301327	0.321264	0.311296	0.0140973	0.572675	0.510282	0.541478	0.0441183	0.264277	0.261383	0.26283	0.00204633
ath-miR159a	0.24369	0.216991	0.230341	0.0188793	0.382975	0.371531	0.377253	0.00809187	0.388191	0.363617	0.375904	0.0173761
ath-miR159b-3p	0.24891	0.22489	0.2369	0.0169844	0.403785	0.410525	0.407155	0.00476602	0.449701	0.438221	0.443961	0.00811773
ath-miR159b-5p	0.1875	0	0.0937501	0.132583	0	0	0	0	0	0	0	0
ath-miR159c	0.668724	0.69482	0.681772	0.0184526	0.739695	0.790959	0.765327	0.0362488	0.678528	0.638898	0.658713	0.0280223
ath-miR160a-3p	#DIV/0!	#DIV/0!	#DIV/0!	#DIV/0!	0	#DIV/0!	#DIV/0!	#DIV/0!	#DIV/0!	#DIV/0!	#DIV/0!	#DIV/0!
ath-miR160a-5p	0.398365	0.437135	0.41775	0.0274145	0.590615	0.537306	0.56396	0.0376953	0.392275	0.350417	0.371346	0.0295983
ath-miR160b	0.398365	0.437135	0.41775	0.0274145	0.590615	0.537306	0.56396	0.0376953	0.392275	0.350417	0.371346	0.0295983
ath-miR160c-3p	#DIV/0!	0	#DIV/0!	#DIV/0!	0.5	0.6	0.55	0.0707108	#DIV/0!	1	#DIV/0!	#DIV/0!
ath-miR160c-5p	0.398365	0.437135	0.41775	0.0274145	0.590615	0.537306	0.56396	0.0376953	0.392275	0.350417	0.371346	0.0295983
ath-miR161.1	0.0174057	0.0128276	0.0151167	0.00323722	0.0148996	0.0188463	0.016873	0.00279078	0.017786	0.0167734	0.0172797	0.000716072
ath-miR161.2	0.16996	0.169916	0.169938	3.09508e-05	0.397436	0.394422	0.395929	0.00213086	0.196154	0.217877	0.207016	0.0153606
ath-miR162a-3p	0.0521855	0.0568118	0.0544986	0.00327127	0.159154	0.148652	0.153903	0.00742596	0.143917	0.141669	0.142793	0.00158919
ath-miR162a-5p	0.0433997	0.0379939	0.0406968	0.00382253	0.0173611	0.0405904	0.0289758	0.0164256	0.0512821	0.0566039	0.053943	0.00376308
ath-miR162b-3p	0.0521855	0.0568118	0.0544986	0.00327127	0.159154	0.148652	0.153903	0.00742596	0.143917	0.141669	0.142793	0.00158919
ath-miR162b-5p	0.0433997	0.0379939	0.0406968	0.00382253	0.0173611	0.0405904	0.0289758	0.0164256	0.0512821	0.0566039	0.053943	0.00376308
ath-miR163	0.102791	0.10165	0.102221	0.000806519	0.374813	0.372742	0.373777	0.00146452	0.15669	0.142948	0.149819	0.00971735
ath-miR164a	0.351497	0.343462	0.347479	0.00568175	0.273473	0.305214	0.289343	0.0224447	0.200324	0.176308	0.188316	0.0169814
ath-miR164b-3p	0	0.0714283	0.0357141	0.0505074	0	0.219512	0.109756	0.155219	0.121213	0.064516	0.0928643	0.0400906
ath-miR164b-5p	0.351497	0.343462	0.347479	0.00568175	0.273473	0.305214	0.289343	0.0224447	0.200324	0.176308	0.188316	0.0169814
ath-miR164c-3p	0.076923	0.363637	0.22028	0.202737	0	0.1	0.05	0.0707107	0.4	0.333333	0.366667	0.0471405
ath-miR164c-5p	0.602632	0.626791	0.614711	0.017083	0.636049	0.688715	0.662382	0.0372406	0.576923	0.500782	0.538852	0.0538398
ath-miR165a-3p	0.150577	0.106786	0.128681	0.0309649	0.114925	0.111485	0.113205	0.00243183	0.0385516	0.0346359	0.0365937	0.0027688
ath-miR165a-5p	0	#DIV/0!	#DIV/0!	#DIV/0!	0	0	0	0	#DIV/0!	#DIV/0!	#DIV/0!	#DIV/0!
ath-miR165b	0.150577	0.106786	0.128681	0.0309649	0.114925	0.111485	0.113205	0.00243183	0.0385516	0.0346359	0.0365937	0.0027688
ath-miR166a-3p	0.0884456	0.0648858	0.0766657	0.0166593	0.142667	0.134829	0.138748	0.00554253	0.0317735	0.0300502	0.0309118	0.00121859
ath-miR166a-5p	#DIV/0!	0	#DIV/0!	#DIV/0!	1	0.333333	0.666667	0.471405	#DIV/0!	0	#DIV/0!	#DIV/0!
ath-miR166b-3p	0.0884456	0.0648858	0.0766657	0.0166593	0.142667	0.134829	0.138748	0.00554253	0.0317735	0.0300502	0.0309118	0.00121859
ath-miR166b-5p	#DIV/0!	0	#DIV/0!	#DIV/0!	1	0.333333	0.666667	0.471405	#DIV/0!	0	#DIV/0!	#DIV/0!
ath-miR166c	0.0884456	0.0648858	0.0766657	0.0166593	0.142667	0.134829	0.138748	0.00554253	0.0317735	0.0300502	0.0309118	0.00121859
ath-miR166d	0.0884456	0.0648858	0.0766657	0.0166593	0.142667	0.134829	0.138748	0.00554253	0.0317735	0.0300502	0.0309118	0.00121859
ath-miR166e-3p	0.0884456	0.0648858	0.0766657	0.0166593	0.142667	0.134829	0.138748	0.00554253	0.0317735	0.0300502	0.0309118	0.00121859
ath-miR166e-5p	#DIV/0!	#DIV/0!	#DIV/0!	#DIV/0!	#DIV/0!	#DIV/0!	#DIV/0!	#DIV/0!	#DIV/0!	#DIV/0!	#DIV/0!	#DIV/0!
ath-miR166f	0.0884456	0.0648858	0.0766657	0.0166593	0.142667	0.134829	0.138748	0.00554253	0.0317735	0.0300502	0.0309118	0.00121859
ath-miR166g	0.0884456	0.0648858	0.0766657	0.0166593	0.142667	0.134829	0.138748	0.00554253	0.0317735	0.0300502	0.0309118	0.00121859
ath-miR167a-3p	#DIV/0!	#DIV/0!	#DIV/0!	#DIV/0!	0	0	0	0	0	0	0	0
ath-miR167a-5p	0.337589	0.334442	0.336015	0.00222557	0.448284	0.561326	0.504805	0.0799327	0.539456	0.542273	0.540865	0.00199237
ath-miR167b	0.337589	0.334442	0.336015	0.00222557	0.448284	0.561326	0.504805	0.0799327	0.539456	0.542273	0.540865	0.00199237
ath-miR167c-3p	0.0103136	0.0141396	0.0122266	0.00270538	0.217636	0.154032	0.185834	0.0449746	0.0669456	0.096	0.0814728	0.0205445
ath-miR167c-5p	0.188679	0.268657	0.228668	0.0565528	0.3	0.394322	0.347161	0.0666957	0.267856	0.276596	0.272226	0.00617981
ath-miR167d	0.745093	0.780329	0.762711	0.0249157	0.848637	0.880707	0.864672	0.0226776	0.826661	0.819029	0.822845	0.00539675
ath-miR168a-3p	0.138728	0.0657278	0.102228	0.0516192	0	0.325	0.1625	0.22981	0.133333	0.0714285	0.102381	0.0437733
ath-miR168a-5p	0.160393	0.147672	0.154032	0.00899469	0.199068	0.191525	0.195296	0.00533363	0.189148	0.175461	0.182304	0.00967808
ath-miR168b-3p	0	0	0	0	#DIV/0!	0	#DIV/0!	#DIV/0!	0	#DIV/0!	#DIV/0!	#DIV/0!
ath-miR168b-5p	0.160393	0.147672	0.154032	0.00899469	0.199068	0.191525	0.195296	0.00533363	0.189148	0.175461	0.182304	0.00967808
ath-miR169a-3p	#DIV/0!	#DIV/0!	#DIV/0!	#DIV/0!	#DIV/0!	#DIV/0!	#DIV/0!	#DIV/0!	#DIV/0!	#DIV/0!	#DIV/0!	#DIV/0!
ath-miR169a-5p	0.25	0.5	0.375	0.176777	0.1	0.461539	0.280769	0.255646	0.181819	0.555556	0.368687	0.264272
ath-miR169b-3p	#DIV/0!	#DIV/0!	#DIV/0!	#DIV/0!	#DIV/0!	#DIV/0!	#DIV/0!	#DIV/0!	#DIV/0!	#DIV/0!	#DIV/0!	#DIV/0!
ath-miR169b-5p	0.25	0.5	0.375	0.176777	0.142857	0.545455	0.344156	0.284679	0.333333	0.833334	0.583333	0.353554
ath-miR169c	0.25	0.5	0.375	0.176777	0.142857	0.545455	0.344156	0.284679	0.333333	0.833334	0.583333	0.353554
ath-miR169d	#DIV/0!	0	#DIV/0!	#DIV/0!	#DIV/0!	#DIV/0!	#DIV/0!	#DIV/0!	1	#DIV/0!	#DIV/0!	#DIV/0!
ath-miR169e	#DIV/0!	0	#DIV/0!	#DIV/0!	#DIV/0!	#DIV/0!	#DIV/0!	#DIV/0!	1	#DIV/0!	#DIV/0!	#DIV/0!
ath-miR169f-3p	0	#DIV/0!	#DIV/0!	#DIV/0!	#DIV/0!	#DIV/0!	#DIV/0!	#DIV/0!	0	#DIV/0!	#DIV/0!	#DIV/0!
ath-miR169f-5p	#DIV/0!	0	#DIV/0!	#DIV/0!	#DIV/0!	#DIV/0!	#DIV/0!	#DIV/0!	1	#DIV/0!	#DIV/0!	#DIV/0!
ath-miR169g-3p	#DIV/0!	#DIV/0!	#DIV/0!	#DIV/0!	#DIV/0!	#DIV/0!	#DIV/0!	#DIV/0!	#DIV/0!	#DIV/0!	#DIV/0!	#DIV/0!
ath-miR169g-5p	#DIV/0!	0	#DIV/0!	#DIV/0!	#DIV/0!	#DIV/0!	#DIV/0!	#DIV/0!	1	#DIV/0!	#DIV/0!	#DIV/0!
ath-miR169h	0.199999	0.4	0.3	0.141422	0	0.375	0.1875	0.265165	0.181818	0.285714	0.233766	0.0734652
ath-miR169i	0.199999	0.4	0.3	0.141422	0	0.375	0.1875	0.265165	0.181818	0.285714	0.233766	0.0734652
ath-miR169j	0.199999	0.4	0.3	0.141422	0	0.375	0.1875	0.265165	0.181818	0.285714	0.233766	0.0734652
ath-miR169k	0.199999	0.4	0.3	0.141422	0	0.375	0.1875	0.265165	0.181818	0.285714	0.233766	0.0734652
ath-miR169l	0.199999	0.4	0.3	0.141422	0	0.375	0.1875	0.265165	0.181818	0.285714	0.233766	0.0734652
ath-miR169m	0.199999	0.4	0.3	0.141422	0	0.375	0.1875	0.265165	0.181818	0.285714	0.233766	0.0734652
ath-miR169n	0.199999	0.4	0.3	0.141422	0	0.375	0.1875	0.265165	0.181818	0.285714	0.233766	0.0734652
ath-miR170-3p	#DIV/0!	0.333333	#DIV/0!	#DIV/0!	0.375	0.32	0.3475	0.0388909	0.125	0.166667	0.145834	0.029463
ath-miR170-5p	0.438486	0.42875	0.433618	0.00688431	0.333022	0.320665	0.326843	0.00873762	0.23044	0.258929	0.244684	0.020145
ath-miR171a-3p	0.296296	0.263158	0.279727	0.0234323	0.439462	0.395604	0.417533	0.0310119	0.232654	0.181818	0.207236	0.035946
ath-miR171a-5p	0.438486	0.42875	0.433618	0.00688431	0.333022	0.320665	0.326843	0.00873762	0.23044	0.258929	0.244684	0.020145
ath-miR171b-3p	0.159575	0.124402	0.141988	0.0248708	0.444445	0.416666	0.430555	0.0196421	0.223578	0.179039	0.201308	0.0314934
ath-miR171b-5p	0	0	0	0	0	0.0769231	0.0384615	0.0543928	#DIV/0!	#DIV/0!	#DIV/0!	#DIV/0!
ath-miR171c-3p	0.159575	0.124402	0.141988	0.0248708	0.444445	0.416666	0.430555	0.0196421	0.223578	0.179039	0.201308	0.0314934
ath-miR171c-5p	0	0	0	0	0.666666	0.5	0.583333	0.117851	#DIV/0!	#DIV/0!	#DIV/0!	#DIV/0!
ath-miR172a	0	0.027027	0.0135135	0.019111	0.027027	0.0627803	0.0449037	0.0252814	0.0494506	0.0759493	0.0626999	0.0187375
ath-miR172b-3p	0	0.027027	0.0135135	0.019111	0.027027	0.0627803	0.0449037	0.0252814	0.0494506	0.0759493	0.0626999	0.0187375
ath-miR172b-5p	#DIV/0!	#DIV/0!	#DIV/0!	#DIV/0!	#DIV/0!	#DIV/0!	#DIV/0!	#DIV/0!	#DIV/0!	#DIV/0!	#DIV/0!	#DIV/0!
ath-miR172c	0	0.166667	0.0833333	0.117851	0.15	0.341464	0.245732	0.135385	0.272727	0.352941	0.312834	0.0567198
ath-miR172d-3p	0	0.166667	0.0833333	0.117851	0.15	0.341464	0.245732	0.135385	0.272727	0.352941	0.312834	0.0567198
ath-miR172d-5p	#DIV/0!	#DIV/0!	#DIV/0!	#DIV/0!	#DIV/0!	#DIV/0!	#DIV/0!	#DIV/0!	#DIV/0!	#DIV/0!	#DIV/0!	#DIV/0!
ath-miR172e-3p	#DIV/0!	0	#DIV/0!	#DIV/0!	0.333333	0	0.166667	0.235702	0	0.333333	0.166667	0.235702
ath-miR172e-5p	#DIV/0!	#DIV/0!	#DIV/0!	#DIV/0!	#DIV/0!	#DIV/0!	#DIV/0!	#DIV/0!	#DIV/0!	#DIV/0!	#DIV/0!	#DIV/0!
ath-miR173-3p	0.731342	0.707317	0.71933	0.0169883	0.6	0.688524	0.644262	0.0625957	0.75	0.6	0.675	0.106066
ath-miR173-5p	0.102316	0.107604	0.10496	0.00373901	0.278403	0.319352	0.298877	0.0289554	0.27027	0.261475	0.265873	0.00621891
ath-miR1886.1	0.2	0	0.0999999	0.141421	#DIV/0!	0.214286	#DIV/0!	#DIV/0!	0	0	0	0
ath-miR1886.2	0	0.113207	0.0566036	0.0800496	0.129032	0.266055	0.197544	0.0968894	0.131868	0.178571	0.15522	0.0330242
ath-miR1886.3	#DIV/0!	#DIV/0!	#DIV/0!	#DIV/0!	#DIV/0!	#DIV/0!	#DIV/0!	#DIV/0!	#DIV/0!	#DIV/0!	#DIV/0!	#DIV/0!
ath-miR1888a	0.419355	0.403846	0.411601	0.010966	0.324324	0.302904	0.313614	0.0151462	0.155844	0.180328	0.168086	0.0173127
ath-miR1888b	0.857143	0.230769	0.543956	0.442913	#DIV/0!	0.375	#DIV/0!	#DIV/0!	0.25	0	0.125	0.176777
ath-miR2111a-3p	#DIV/0!	#DIV/0!	#DIV/0!	#DIV/0!	#DIV/0!	#DIV/0!	#DIV/0!	#DIV/0!	0	#DIV/0!	#DIV/0!	#DIV/0!
ath-miR2111a-5p	#DIV/0!	#DIV/0!	#DIV/0!	#DIV/0!	1	1	1	0	0.5	0	0.25	0.353553
ath-miR2111b-3p	#DIV/0!	#DIV/0!	#DIV/0!	#DIV/0!	#DIV/0!	0	#DIV/0!	#DIV/0!	0	#DIV/0!	#DIV/0!	#DIV/0!
ath-miR2111b-5p	#DIV/0!	#DIV/0!	#DIV/0!	#DIV/0!	1	1	1	0	0.5	0	0.25	0.353553
ath-miR2112-3p	0	0	0	0	0	0.333333	0.166667	0.235702	0	0.142857	0.0714285	0.101015
ath-miR2112-5p	#DIV/0!	#DIV/0!	#DIV/0!	#DIV/0!	#DIV/0!	#DIV/0!	#DIV/0!	#DIV/0!	#DIV/0!	#DIV/0!	#DIV/0!	#DIV/0!
ath-miR2933a	#DIV/0!	#DIV/0!	#DIV/0!	#DIV/0!	#DIV/0!	#DIV/0!	#DIV/0!	#DIV/0!	#DIV/0!	#DIV/0!	#DIV/0!	#DIV/0!
ath-miR2933b	#DIV/0!	#DIV/0!	#DIV/0!	#DIV/0!	#DIV/0!	#DIV/0!	#DIV/0!	#DIV/0!	#DIV/0!	#DIV/0!	#DIV/0!	#DIV/0!
ath-miR2934-3p	#DIV/0!	#DIV/0!	#DIV/0!	#DIV/0!	#DIV/0!	0	#DIV/0!	#DIV/0!	#DIV/0!	#DIV/0!	#DIV/0!	#DIV/0!
ath-miR2934-5p	0	0	0	0	0	0	0	0	0	0	0	0
ath-miR2936	#DIV/0!	#DIV/0!	#DIV/0!	#DIV/0!	0	#DIV/0!	#DIV/0!	#DIV/0!	#DIV/0!	#DIV/0!	#DIV/0!	#DIV/0!
ath-miR2939	#DIV/0!	#DIV/0!	#DIV/0!	#DIV/0!	#DIV/0!	#DIV/0!	#DIV/0!	#DIV/0!	#DIV/0!	#DIV/0!	#DIV/0!	#DIV/0!
ath-miR319a	0.0925414	0.0532061	0.0728737	0.0278142	0.191185	0.179326	0.185255	0.00838563	0.0693411	0.0690738	0.0692075	0.00018901
ath-miR319b	0.0925414	0.0532061	0.0728737	0.0278142	0.191185	0.179326	0.185255	0.00838563	0.0693411	0.0690738	0.0692075	0.00018901
ath-miR319c	0.00983555	0.00507901	0.00745728	0.00336338	0.0733707	0.0659032	0.0696369	0.00528032	0.0301745	0.0315248	0.0308497	0.000954791
ath-miR3434-3p	#DIV/0!	#DIV/0!	#DIV/0!	#DIV/0!	#DIV/0!	#DIV/0!	#DIV/0!	#DIV/0!	#DIV/0!	#DIV/0!	#DIV/0!	#DIV/0!
ath-miR3434-5p	#DIV/0!	#DIV/0!	#DIV/0!	#DIV/0!	#DIV/0!	#DIV/0!	#DIV/0!	#DIV/0!	#DIV/0!	#DIV/0!	#DIV/0!	#DIV/0!
ath-miR3440b-3p	0.111111	0.032258	0.0716847	0.0557578	0.0714286	0.0714286	0.0714286	3.41444e-08	0.2	0	0.1	0.141421
ath-miR3440b-5p	#DIV/0!	0	#DIV/0!	#DIV/0!	0.2	0.0833333	0.141667	0.0824958	0	0	0	0
ath-miR390a-3p	0.309091	0.322429	0.31576	0.00943161	0.4	0.37594	0.38797	0.0170129	0.214285	0.428572	0.321429	0.151524
ath-miR390a-5p	0.0740742	0.178571	0.126323	0.0738907	0.11579	0.135714	0.125752	0.0140888	0.0230768	0.0499999	0.0365384	0.0190375
ath-miR390b-3p	0.5	0.25	0.375	0.176776	0.625	0.9	0.7625	0.194454	0.666667	1	0.833333	0.235702
ath-miR390b-5p	0.0740742	0.178571	0.126323	0.0738907	0.11579	0.135714	0.125752	0.0140888	0.0230768	0.0499999	0.0365384	0.0190375
ath-miR391-3p	#DIV/0!	#DIV/0!	#DIV/0!	#DIV/0!	#DIV/0!	1	#DIV/0!	#DIV/0!	#DIV/0!	#DIV/0!	#DIV/0!	#DIV/0!
ath-miR391-5p	0.133334	0.23656	0.184947	0.072992	0.25641	0.165548	0.210979	0.064249	0.104762	0.106557	0.105659	0.00126956
ath-miR3932a	#DIV/0!	#DIV/0!	#DIV/0!	#DIV/0!	#DIV/0!	#DIV/0!	#DIV/0!	#DIV/0!	#DIV/0!	#DIV/0!	#DIV/0!	#DIV/0!
ath-miR3932b-3p	#DIV/0!	#DIV/0!	#DIV/0!	#DIV/0!	#DIV/0!	#DIV/0!	#DIV/0!	#DIV/0!	#DIV/0!	#DIV/0!	#DIV/0!	#DIV/0!
ath-miR3932b-5p	0.0127103	0.0133992	0.0130547	0.00048718	0.0490426	0.0423837	0.0457131	0.00470851	0.0277778	0.0161031	0.0219404	0.00825525
ath-miR3933	#DIV/0!	#DIV/0!	#DIV/0!	#DIV/0!	#DIV/0!	#DIV/0!	#DIV/0!	#DIV/0!	#DIV/0!	#DIV/0!	#DIV/0!	#DIV/0!
ath-miR393a-3p	0	0	0	0	0	0.166667	0.0833333	0.117851	0	0	0	0
ath-miR393a-5p	0.709898	0.700787	0.705343	0.00644194	0.683674	0.688889	0.686281	0.00368749	0.788547	0.74138	0.764963	0.0333521
ath-miR393b-3p	0.0643777	0.0347489	0.0495633	0.0209507	0.0454545	0.0558659	0.0506602	0.00736194	0.075188	0.0123457	0.0437668	0.0444362
ath-miR393b-5p	0.709898	0.700787	0.705343	0.00644194	0.683674	0.688889	0.686281	0.00368749	0.788547	0.74138	0.764963	0.0333521
ath-miR394a	0.0259741	0.0171919	0.021583	0.00620993	0.013683	0.0146559	0.0141695	0.000687957	0.0106305	0.00958588	0.0101082	0.00073865
ath-miR394b-3p	#DIV/0!	#DIV/0!	#DIV/0!	#DIV/0!	#DIV/0!	#DIV/0!	#DIV/0!	#DIV/0!	#DIV/0!	#DIV/0!	#DIV/0!	#DIV/0!
ath-miR394b-5p	0.0259741	0.0171919	0.021583	0.00620993	0.013683	0.0146559	0.0141695	0.000687957	0.0106305	0.00958588	0.0101082	0.00073865
ath-miR395a	0.0140734	0.0234108	0.0187421	0.00660253	0.0315003	0.0264941	0.0289972	0.00353991	0.0361881	0.040493	0.0383405	0.00304401
ath-miR395b	0.00717234	0.0102656	0.00871897	0.00218726	0.0252261	0.0238784	0.0245523	0.000952949	0.0602093	0.0378151	0.0490122	0.0158351
ath-miR395c	0.00717234	0.0102656	0.00871897	0.00218726	0.0252261	0.0238784	0.0245523	0.000952949	0.0602093	0.0378151	0.0490122	0.0158351
ath-miR395d	0.0140734	0.0234108	0.0187421	0.00660253	0.0315003	0.0264941	0.0289972	0.00353991	0.0361881	0.040493	0.0383405	0.00304401
ath-miR395e	0.0140734	0.0234108	0.0187421	0.00660253	0.0315003	0.0264941	0.0289972	0.00353991	0.0361881	0.040493	0.0383405	0.00304401
ath-miR395f	0.00717234	0.0102656	0.00871897	0.00218726	0.0252261	0.0238784	0.0245523	0.000952949	0.0602093	0.0378151	0.0490122	0.0158351
ath-miR396a-3p	0.169383	0.212899	0.191141	0.0307705	0.278422	0.32046	0.299441	0.0297249	0.288889	0.257575	0.273232	0.0221421
ath-miR396a-5p	0.656501	0.649633	0.653067	0.00485652	0.578863	0.627162	0.603013	0.0341524	0.468868	0.454893	0.46188	0.00988162
ath-miR396b-3p	0.180162	0.173914	0.177038	0.00441814	0.224138	0.233463	0.228801	0.00659362	0.197424	0.2	0.198712	0.00182134
ath-miR396b-5p	0.19787	0.177723	0.187797	0.0142459	0.153394	0.153997	0.153696	0.000426258	0.132207	0.139801	0.136004	0.00536982
ath-miR397a	0.125	0.173913	0.149457	0.0345863	0.585714	0.476534	0.531124	0.0772019	0.236843	0.234694	0.235768	0.00151924
ath-miR397b	0	0.0869565	0.0434783	0.0614876	0.259259	0.275	0.26713	0.0111305	0.283186	0.244898	0.264042	0.0270734
ath-miR398a-3p	0.0690328	0.0469388	0.0579858	0.0156228	0.103928	0.128944	0.116436	0.0176893	0.104202	0.0789239	0.0915632	0.0178746
ath-miR398a-5p	#DIV/0!	#DIV/0!	#DIV/0!	#DIV/0!	#DIV/0!	#DIV/0!	#DIV/0!	#DIV/0!	#DIV/0!	#DIV/0!	#DIV/0!	#DIV/0!
ath-miR398b-3p	0.00521489	0.00356355	0.00438922	0.00116767	0.010738	0.0102338	0.0104859	0.000356489	0.0117731	0.0095845	0.0106788	0.00154757
ath-miR398b-5p	#DIV/0!	#DIV/0!	#DIV/0!	#DIV/0!	0	0	0	0	0	#DIV/0!	#DIV/0!	#DIV/0!
ath-miR398c-3p	0.00521489	0.00356355	0.00438922	0.00116767	0.010738	0.0102338	0.0104859	0.000356489	0.0117731	0.0095845	0.0106788	0.00154757
ath-miR398c-5p	#DIV/0!	#DIV/0!	#DIV/0!	#DIV/0!	0	0	0	0	0	#DIV/0!	#DIV/0!	#DIV/0!
ath-miR399a	0	0.333333	0.166667	0.235702	0	0.0400001	0.02	0.0282843	0.111111	0.142857	0.126984	0.0224477
ath-miR399b	0.00469483	0.0092166	0.00695571	0.00319737	0.0113636	0.0222223	0.0167929	0.0076782	0.0342466	0.0609756	0.0476111	0.0189002
ath-miR399c-3p	0.00469483	0.0092166	0.00695571	0.00319737	0.0113636	0.0222223	0.0167929	0.0076782	0.0342466	0.0609756	0.0476111	0.0189002
ath-miR399c-5p	#DIV/0!	#DIV/0!	#DIV/0!	#DIV/0!	#DIV/0!	#DIV/0!	#DIV/0!	#DIV/0!	#DIV/0!	#DIV/0!	#DIV/0!	#DIV/0!
ath-miR399d	0	0.5	0.25	0.353553	#DIV/0!	0.142857	#DIV/0!	#DIV/0!	0.142858	0.076923	0.10989	0.0466229
ath-miR399e	1	0	0.5	0.707107	#DIV/0!	0.5	#DIV/0!	#DIV/0!	0	0	0	0
ath-miR399f	#DIV/0!	0.5	#DIV/0!	#DIV/0!	0	0.285714	0.142857	0.20203	0.1	0.142857	0.121428	0.0303044
ath-miR400	0	0	0	0	1	0.25	0.625	0.53033	0.375	0.214286	0.294643	0.113642
ath-miR402	0.0760871	0.0731706	0.0746289	0.00206225	0.272727	0.171429	0.222078	0.0716289	0.0277778	0.0454545	0.0366162	0.0124993
ath-miR403-3p	0.0771548	0.101335	0.0892449	0.017098	0.167543	0.182061	0.174802	0.010266	0.128755	0.113447	0.121101	0.0108243
ath-miR403-5p	0.124204	0.121622	0.122913	0.00182591	0.221649	0.220888	0.221269	0.000538802	0.114286	0.0650408	0.0896634	0.0348217
ath-miR404	#DIV/0!	#DIV/0!	#DIV/0!	#DIV/0!	0	0	0	0	0	0	0	0
ath-miR406	#DIV/0!	#DIV/0!	#DIV/0!	#DIV/0!	0	#DIV/0!	#DIV/0!	#DIV/0!	0	#DIV/0!	#DIV/0!	#DIV/0!
ath-miR408-3p	0.0126691	0.0134854	0.0130773	0.000577232	0.0287247	0.0318982	0.0303115	0.00224396	0.0263593	0.0246133	0.0254863	0.00123462
ath-miR408-5p	0.0992795	0.0796044	0.089442	0.0139124	0.103866	0.12	0.111933	0.0114086	0.0833332	0.0929462	0.0881397	0.00679738
ath-miR419	#DIV/0!	#DIV/0!	#DIV/0!	#DIV/0!	#DIV/0!	#DIV/0!	#DIV/0!	#DIV/0!	0	#DIV/0!	#DIV/0!	#DIV/0!
ath-miR4221	#DIV/0!	0.2	#DIV/0!	#DIV/0!	0.25	0.333333	0.291667	0.0589252	0.5	#DIV/0!	#DIV/0!	#DIV/0!
ath-miR4227	#DIV/0!	#DIV/0!	#DIV/0!	#DIV/0!	0	#DIV/0!	#DIV/0!	#DIV/0!	#DIV/0!	0	#DIV/0!	#DIV/0!
ath-miR4228-3p	0.352942	0.391304	0.372123	0.0271261	1	0.230769	0.615385	0.543928	0.25	0	0.125	0.176777
ath-miR4228-5p	#DIV/0!	#DIV/0!	#DIV/0!	#DIV/0!	0	#DIV/0!	#DIV/0!	#DIV/0!	#DIV/0!	#DIV/0!	#DIV/0!	#DIV/0!
ath-miR4239	#DIV/0!	#DIV/0!	#DIV/0!	#DIV/0!	#DIV/0!	#DIV/0!	#DIV/0!	#DIV/0!	#DIV/0!	#DIV/0!	#DIV/0!	#DIV/0!
ath-miR4243	#DIV/0!	#DIV/0!	#DIV/0!	#DIV/0!	#DIV/0!	0	#DIV/0!	#DIV/0!	0	#DIV/0!	#DIV/0!	#DIV/0!
ath-miR4245	#DIV/0!	#DIV/0!	#DIV/0!	#DIV/0!	0	#DIV/0!	#DIV/0!	#DIV/0!	#DIV/0!	#DIV/0!	#DIV/0!	#DIV/0!
ath-miR447a-3p	0.167382	0.193836	0.180609	0.0187058	0.358921	0.392268	0.375595	0.0235802	0.253247	0.26087	0.257059	0.00539014
ath-miR447a.2-3p	0.17931	0.145396	0.162353	0.0239812	0.183674	0.191042	0.187358	0.00521048	0.0824262	0.0608228	0.0716245	0.0152759
ath-miR447b	0.167382	0.193836	0.180609	0.0187058	0.358921	0.392268	0.375595	0.0235802	0.253247	0.26087	0.257059	0.00539014
ath-miR447c-3p	#DIV/0!	#DIV/0!	#DIV/0!	#DIV/0!	#DIV/0!	0	#DIV/0!	#DIV/0!	#DIV/0!	#DIV/0!	#DIV/0!	#DIV/0!
ath-miR447c-5p	#DIV/0!	#DIV/0!	#DIV/0!	#DIV/0!	#DIV/0!	#DIV/0!	#DIV/0!	#DIV/0!	#DIV/0!	#DIV/0!	#DIV/0!	#DIV/0!
ath-miR472-3p	0.118135	0.0852392	0.101687	0.0232605	0.118881	0.113217	0.116049	0.00400487	0.0807249	0.104326	0.0925254	0.0166884
ath-miR472-5p	0.5	#DIV/0!	#DIV/0!	#DIV/0!	0	0.5	0.25	0.353553	#DIV/0!	0	#DIV/0!	#DIV/0!
ath-miR5012	0.097826	0.197452	0.147639	0.0704465	0.569506	0.545607	0.557557	0.0168995	0.109244	0.157407	0.133326	0.0340568
ath-miR5013	0	#DIV/0!	#DIV/0!	#DIV/0!	#DIV/0!	0	#DIV/0!	#DIV/0!	#DIV/0!	#DIV/0!	#DIV/0!	#DIV/0!
ath-miR5014a-3p	#DIV/0!	1	#DIV/0!	#DIV/0!	#DIV/0!	#DIV/0!	#DIV/0!	#DIV/0!	#DIV/0!	#DIV/0!	#DIV/0!	#DIV/0!
ath-miR5014a-5p	#DIV/0!	#DIV/0!	#DIV/0!	#DIV/0!	#DIV/0!	#DIV/0!	#DIV/0!	#DIV/0!	#DIV/0!	#DIV/0!	#DIV/0!	#DIV/0!
ath-miR5014b	#DIV/0!	#DIV/0!	#DIV/0!	#DIV/0!	#DIV/0!	#DIV/0!	#DIV/0!	#DIV/0!	#DIV/0!	#DIV/0!	#DIV/0!	#DIV/0!
ath-miR5019	#DIV/0!	#DIV/0!	#DIV/0!	#DIV/0!	#DIV/0!	0	#DIV/0!	#DIV/0!	#DIV/0!	#DIV/0!	#DIV/0!	#DIV/0!
ath-miR5020a	0.5	#DIV/0!	#DIV/0!	#DIV/0!	#DIV/0!	#DIV/0!	#DIV/0!	#DIV/0!	#DIV/0!	#DIV/0!	#DIV/0!	#DIV/0!
ath-miR5020b	#DIV/0!	#DIV/0!	#DIV/0!	#DIV/0!	#DIV/0!	#DIV/0!	#DIV/0!	#DIV/0!	#DIV/0!	#DIV/0!	#DIV/0!	#DIV/0!
ath-miR5020c	1	0	0.5	0.707107	#DIV/0!	#DIV/0!	#DIV/0!	#DIV/0!	#DIV/0!	#DIV/0!	#DIV/0!	#DIV/0!
ath-miR5023	#DIV/0!	#DIV/0!	#DIV/0!	#DIV/0!	#DIV/0!	1	#DIV/0!	#DIV/0!	#DIV/0!	#DIV/0!	#DIV/0!	#DIV/0!
ath-miR5024-3p	0.0915033	0.0758929	0.0836981	0.0110382	0.102564	0.0740741	0.0883191	0.0201454	0	0.142857	0.0714285	0.101015
ath-miR5024-5p	#DIV/0!	#DIV/0!	#DIV/0!	#DIV/0!	#DIV/0!	#DIV/0!	#DIV/0!	#DIV/0!	#DIV/0!	#DIV/0!	#DIV/0!	#DIV/0!
ath-miR5026	0.0100825	0.00576921	0.00792586	0.00304995	0.0032	0.00854701	0.0058735	0.00378091	0.0227273	0.0214286	0.0220779	0.000918305
ath-miR5027	#DIV/0!	0	#DIV/0!	#DIV/0!	#DIV/0!	#DIV/0!	#DIV/0!	#DIV/0!	0	#DIV/0!	#DIV/0!	#DIV/0!
ath-miR5028	0.5	0.142857	0.321428	0.252538	0.285714	0.416667	0.35119	0.0925975	0.749999	0.2	0.474999	0.388908
ath-miR5029	#DIV/0!	#DIV/0!	#DIV/0!	#DIV/0!	#DIV/0!	#DIV/0!	#DIV/0!	#DIV/0!	#DIV/0!	#DIV/0!	#DIV/0!	#DIV/0!
ath-miR5595a	0	0	0	0	0	0	0	0	#DIV/0!	0	#DIV/0!	#DIV/0!
ath-miR5629	0.333334	1	0.666667	0.471404	0.5	0.333333	0.416667	0.117851	0	0	0	0
ath-miR5631	#DIV/0!	#DIV/0!	#DIV/0!	#DIV/0!	0	1	0.5	0.707107	#DIV/0!	#DIV/0!	#DIV/0!	#DIV/0!
ath-miR5632-3p	0	1	0.5	0.707107	#DIV/0!	0	#DIV/0!	#DIV/0!	#DIV/0!	#DIV/0!	#DIV/0!	#DIV/0!
ath-miR5632-5p	0	#DIV/0!	#DIV/0!	#DIV/0!	#DIV/0!	0	#DIV/0!	#DIV/0!	0	0	0	0
ath-miR5633	#DIV/0!	#DIV/0!	#DIV/0!	#DIV/0!	#DIV/0!	#DIV/0!	#DIV/0!	#DIV/0!	0	#DIV/0!	#DIV/0!	#DIV/0!
ath-miR5634	#DIV/0!	#DIV/0!	#DIV/0!	#DIV/0!	#DIV/0!	#DIV/0!	#DIV/0!	#DIV/0!	#DIV/0!	#DIV/0!	#DIV/0!	#DIV/0!
ath-miR5635a	#DIV/0!	#DIV/0!	#DIV/0!	#DIV/0!	#DIV/0!	#DIV/0!	#DIV/0!	#DIV/0!	#DIV/0!	#DIV/0!	#DIV/0!	#DIV/0!
ath-miR5635b	#DIV/0!	#DIV/0!	#DIV/0!	#DIV/0!	#DIV/0!	#DIV/0!	#DIV/0!	#DIV/0!	#DIV/0!	#DIV/0!	#DIV/0!	#DIV/0!
ath-miR5635c	#DIV/0!	#DIV/0!	#DIV/0!	#DIV/0!	#DIV/0!	#DIV/0!	#DIV/0!	#DIV/0!	#DIV/0!	#DIV/0!	#DIV/0!	#DIV/0!
ath-miR5635d	#DIV/0!	#DIV/0!	#DIV/0!	#DIV/0!	#DIV/0!	#DIV/0!	#DIV/0!	#DIV/0!	#DIV/0!	#DIV/0!	#DIV/0!	#DIV/0!
ath-miR5636	#DIV/0!	#DIV/0!	#DIV/0!	#DIV/0!	#DIV/0!	#DIV/0!	#DIV/0!	#DIV/0!	#DIV/0!	#DIV/0!	#DIV/0!	#DIV/0!
ath-miR5637	0	0.25	0.125	0.176777	0.181818	0.242424	0.212121	0.0428552	0	0	0	0
ath-miR5638a	0	#DIV/0!	#DIV/0!	#DIV/0!	#DIV/0!	#DIV/0!	#DIV/0!	#DIV/0!	0	#DIV/0!	#DIV/0!	#DIV/0!
ath-miR5638b	#DIV/0!	#DIV/0!	#DIV/0!	#DIV/0!	0	0.142857	0.0714286	0.101015	0	#DIV/0!	#DIV/0!	#DIV/0!
ath-miR5639-3p	#DIV/0!	#DIV/0!	#DIV/0!	#DIV/0!	#DIV/0!	#DIV/0!	#DIV/0!	#DIV/0!	#DIV/0!	#DIV/0!	#DIV/0!	#DIV/0!
ath-miR5639-5p	#DIV/0!	0	#DIV/0!	#DIV/0!	0	0	0	0	0	0	0	0
ath-miR5640	0.645162	0.5	0.572581	0.102645	0.833333	0.58	0.706667	0.179134	0.400001	0.666667	0.533334	0.188561
ath-miR5641	0	0.5	0.25	0.353553	#DIV/0!	0	#DIV/0!	#DIV/0!	#DIV/0!	1	#DIV/0!	#DIV/0!
ath-miR5642a	0.0121951	0.0650886	0.0386419	0.0374013	0.0754006	0.0462837	0.0608421	0.0205887	0.0526317	0.0374531	0.0450424	0.0107329
ath-miR5642b	0.0121951	0.0650886	0.0386419	0.0374013	0.0754006	0.0462837	0.0608421	0.0205887	0.0526317	0.0374531	0.0450424	0.0107329
ath-miR5643a	#DIV/0!	0	#DIV/0!	#DIV/0!	0	0	0	0	#DIV/0!	#DIV/0!	#DIV/0!	#DIV/0!
ath-miR5643b	#DIV/0!	0	#DIV/0!	#DIV/0!	0	0	0	0	#DIV/0!	#DIV/0!	#DIV/0!	#DIV/0!
ath-miR5644	#DIV/0!	0	#DIV/0!	#DIV/0!	#DIV/0!	#DIV/0!	#DIV/0!	#DIV/0!	#DIV/0!	#DIV/0!	#DIV/0!	#DIV/0!
ath-miR5645a	#DIV/0!	#DIV/0!	#DIV/0!	#DIV/0!	#DIV/0!	#DIV/0!	#DIV/0!	#DIV/0!	#DIV/0!	#DIV/0!	#DIV/0!	#DIV/0!
ath-miR5645b	#DIV/0!	#DIV/0!	#DIV/0!	#DIV/0!	#DIV/0!	#DIV/0!	#DIV/0!	#DIV/0!	#DIV/0!	#DIV/0!	#DIV/0!	#DIV/0!
ath-miR5645c	#DIV/0!	#DIV/0!	#DIV/0!	#DIV/0!	#DIV/0!	0	#DIV/0!	#DIV/0!	#DIV/0!	#DIV/0!	#DIV/0!	#DIV/0!
ath-miR5645d	#DIV/0!	#DIV/0!	#DIV/0!	#DIV/0!	#DIV/0!	#DIV/0!	#DIV/0!	#DIV/0!	#DIV/0!	#DIV/0!	#DIV/0!	#DIV/0!
ath-miR5645e	#DIV/0!	#DIV/0!	#DIV/0!	#DIV/0!	#DIV/0!	#DIV/0!	#DIV/0!	#DIV/0!	#DIV/0!	#DIV/0!	#DIV/0!	#DIV/0!
ath-miR5645f	#DIV/0!	#DIV/0!	#DIV/0!	#DIV/0!	#DIV/0!	#DIV/0!	#DIV/0!	#DIV/0!	#DIV/0!	#DIV/0!	#DIV/0!	#DIV/0!
ath-miR5646	#DIV/0!	#DIV/0!	#DIV/0!	#DIV/0!	#DIV/0!	#DIV/0!	#DIV/0!	#DIV/0!	#DIV/0!	#DIV/0!	#DIV/0!	#DIV/0!
ath-miR5647	1	0	0.5	0.707107	1	0.75	0.875	0.176777	0	#DIV/0!	#DIV/0!	#DIV/0!
ath-miR5648-3p	#DIV/0!	#DIV/0!	#DIV/0!	#DIV/0!	#DIV/0!	#DIV/0!	#DIV/0!	#DIV/0!	#DIV/0!	#DIV/0!	#DIV/0!	#DIV/0!
ath-miR5648-5p	0.285714	0.153846	0.21978	0.0932444	0.0769231	0.15625	0.116587	0.0560926	0	0.142857	0.0714286	0.101015
ath-miR5649a	#DIV/0!	#DIV/0!	#DIV/0!	#DIV/0!	#DIV/0!	#DIV/0!	#DIV/0!	#DIV/0!	#DIV/0!	#DIV/0!	#DIV/0!	#DIV/0!
ath-miR5649b	#DIV/0!	#DIV/0!	#DIV/0!	#DIV/0!	#DIV/0!	#DIV/0!	#DIV/0!	#DIV/0!	#DIV/0!	#DIV/0!	#DIV/0!	#DIV/0!
ath-miR5650	0.0820894	0.134615	0.108352	0.0371415	0.047619	0.116959	0.082289	0.0490308	0.081081	0	0.0405405	0.057333
ath-miR5651	0.303571	0.311688	0.30763	0.00573953	0.461539	0.297521	0.37953	0.115978	0.0624999	0.12	0.0912501	0.040659
ath-miR5652	0.0833333	0	0.0416667	0.0589256	0	0.0344828	0.0172414	0.024383	0	0	0	0
ath-miR5653	0.833333	0.909091	0.871212	0.0535691	0.75	1	0.875	0.176777	1	#DIV/0!	#DIV/0!	#DIV/0!
ath-miR5654-3p	0.172205	0.143267	0.157736	0.0204629	0.180645	0.227865	0.204255	0.0333893	0.175439	0.167598	0.171518	0.00554411
ath-miR5654-5p	#DIV/0!	#DIV/0!	#DIV/0!	#DIV/0!	#DIV/0!	0	#DIV/0!	#DIV/0!	#DIV/0!	#DIV/0!	#DIV/0!	#DIV/0!
ath-miR5655	#DIV/0!	#DIV/0!	#DIV/0!	#DIV/0!	#DIV/0!	#DIV/0!	#DIV/0!	#DIV/0!	#DIV/0!	#DIV/0!	#DIV/0!	#DIV/0!
ath-miR5656	#DIV/0!	#DIV/0!	#DIV/0!	#DIV/0!	#DIV/0!	0	#DIV/0!	#DIV/0!	0	#DIV/0!	#DIV/0!	#DIV/0!
ath-miR5657	0	0	0	0	0	0.272727	0.136364	0.192847	0	0.333333	0.166667	0.235702
ath-miR5658	#DIV/0!	#DIV/0!	#DIV/0!	#DIV/0!	1	#DIV/0!	#DIV/0!	#DIV/0!	#DIV/0!	1	#DIV/0!	#DIV/0!
ath-miR5659	#DIV/0!	#DIV/0!	#DIV/0!	#DIV/0!	#DIV/0!	#DIV/0!	#DIV/0!	#DIV/0!	#DIV/0!	#DIV/0!	#DIV/0!	#DIV/0!
ath-miR5660	#DIV/0!	#DIV/0!	#DIV/0!	#DIV/0!	#DIV/0!	0	#DIV/0!	#DIV/0!	#DIV/0!	#DIV/0!	#DIV/0!	#DIV/0!
ath-miR5661	#DIV/0!	#DIV/0!	#DIV/0!	#DIV/0!	#DIV/0!	#DIV/0!	#DIV/0!	#DIV/0!	#DIV/0!	#DIV/0!	#DIV/0!	#DIV/0!
ath-miR5662	#DIV/0!	#DIV/0!	#DIV/0!	#DIV/0!	#DIV/0!	#DIV/0!	#DIV/0!	#DIV/0!	#DIV/0!	#DIV/0!	#DIV/0!	#DIV/0!
ath-miR5663-3p	#DIV/0!	#DIV/0!	#DIV/0!	#DIV/0!	0	#DIV/0!	#DIV/0!	#DIV/0!	#DIV/0!	#DIV/0!	#DIV/0!	#DIV/0!
ath-miR5663-5p	#DIV/0!	#DIV/0!	#DIV/0!	#DIV/0!	#DIV/0!	#DIV/0!	#DIV/0!	#DIV/0!	0	#DIV/0!	#DIV/0!	#DIV/0!
ath-miR5664	#DIV/0!	#DIV/0!	#DIV/0!	#DIV/0!	#DIV/0!	#DIV/0!	#DIV/0!	#DIV/0!	#DIV/0!	#DIV/0!	#DIV/0!	#DIV/0!
ath-miR5665	0	#DIV/0!	#DIV/0!	#DIV/0!	0	#DIV/0!	#DIV/0!	#DIV/0!	#DIV/0!	#DIV/0!	#DIV/0!	#DIV/0!
ath-miR5666	#DIV/0!	#DIV/0!	#DIV/0!	#DIV/0!	#DIV/0!	#DIV/0!	#DIV/0!	#DIV/0!	#DIV/0!	#DIV/0!	#DIV/0!	#DIV/0!
ath-miR5995b	0	0	0	0	0	0	0	0	#DIV/0!	0	#DIV/0!	#DIV/0!
ath-miR5996	0.448598	0.335435	0.392017	0.0800181	0.276471	0.391597	0.334034	0.081407	0.263682	0.254238	0.25896	0.00667792
ath-miR5997	0	#DIV/0!	#DIV/0!	#DIV/0!	0	0	0	0	#DIV/0!	1	#DIV/0!	#DIV/0!
ath-miR5998a	#DIV/0!	#DIV/0!	#DIV/0!	#DIV/0!	#DIV/0!	#DIV/0!	#DIV/0!	#DIV/0!	#DIV/0!	#DIV/0!	#DIV/0!	#DIV/0!
ath-miR5998b	#DIV/0!	#DIV/0!	#DIV/0!	#DIV/0!	#DIV/0!	#DIV/0!	#DIV/0!	#DIV/0!	#DIV/0!	#DIV/0!	#DIV/0!	#DIV/0!
ath-miR5999	1	#DIV/0!	#DIV/0!	#DIV/0!	#DIV/0!	0	#DIV/0!	#DIV/0!	#DIV/0!	#DIV/0!	#DIV/0!	#DIV/0!
ath-miR771	0.666667	0.5	0.583334	0.117851	1	0.727273	0.863636	0.192847	0.599999	0.333333	0.466666	0.188561
ath-miR773a	0.0133333	0.0153846	0.014359	0.00145047	0.0494505	0.038526	0.0439883	0.00772476	0.0108992	0.0155383	0.0132187	0.00328035
ath-miR773b-3p	0	#DIV/0!	#DIV/0!	#DIV/0!	0	0	0	0	0	#DIV/0!	#DIV/0!	#DIV/0!
ath-miR774a	#DIV/0!	#DIV/0!	#DIV/0!	#DIV/0!	#DIV/0!	#DIV/0!	#DIV/0!	#DIV/0!	#DIV/0!	#DIV/0!	#DIV/0!	#DIV/0!
ath-miR775	0.0980392	0.0631469	0.080593	0.0246726	0.125848	0.168957	0.147402	0.0304828	0.163462	0.149312	0.156387	0.0100049
ath-miR776	#DIV/0!	#DIV/0!	#DIV/0!	#DIV/0!	#DIV/0!	#DIV/0!	#DIV/0!	#DIV/0!	#DIV/0!	#DIV/0!	#DIV/0!	#DIV/0!
ath-miR777	#DIV/0!	#DIV/0!	#DIV/0!	#DIV/0!	0	0	0	0	0.135135	0.0227273	0.0789311	0.0794842
ath-miR778	#DIV/0!	#DIV/0!	#DIV/0!	#DIV/0!	#DIV/0!	#DIV/0!	#DIV/0!	#DIV/0!	#DIV/0!	#DIV/0!	#DIV/0!	#DIV/0!
ath-miR779.1	0	0	0	0	0.4	0.137931	0.268965	0.18531	0	0.076923	0.0384615	0.0543928
ath-miR779.2	0	0	0	0	0.0833333	0.0872094	0.0852714	0.00274079	0.0333334	0.025	0.0291667	0.00589259
ath-miR780.1	0	0	0	0	0	0	0	0	0	0	0	0
ath-miR780.2	0.5	0	0.25	0.353553	0	0	0	0	0	0	0	0
ath-miR781a	0.0591398	0.0847881	0.0719639	0.0181361	0.258824	0.258586	0.258705	0.000168075	0.31982	0.255033	0.287427	0.0458114
ath-miR781b	0.0591398	0.0847881	0.0719639	0.0181361	0.258824	0.258586	0.258705	0.000168075	0.31982	0.255033	0.287427	0.0458114
ath-miR782	#DIV/0!	#DIV/0!	#DIV/0!	#DIV/0!	#DIV/0!	#DIV/0!	#DIV/0!	#DIV/0!	#DIV/0!	#DIV/0!	#DIV/0!	#DIV/0!
ath-miR8121	#DIV/0!	#DIV/0!	#DIV/0!	#DIV/0!	#DIV/0!	#DIV/0!	#DIV/0!	#DIV/0!	#DIV/0!	#DIV/0!	#DIV/0!	#DIV/0!
ath-miR8165	#DIV/0!	#DIV/0!	#DIV/0!	#DIV/0!	#DIV/0!	#DIV/0!	#DIV/0!	#DIV/0!	#DIV/0!	#DIV/0!	#DIV/0!	#DIV/0!
ath-miR8166	#DIV/0!	#DIV/0!	#DIV/0!	#DIV/0!	1	#DIV/0!	#DIV/0!	#DIV/0!	#DIV/0!	#DIV/0!	#DIV/0!	#DIV/0!
ath-miR8167a	#DIV/0!	#DIV/0!	#DIV/0!	#DIV/0!	#DIV/0!	#DIV/0!	#DIV/0!	#DIV/0!	#DIV/0!	#DIV/0!	#DIV/0!	#DIV/0!
ath-miR8167b	#DIV/0!	#DIV/0!	#DIV/0!	#DIV/0!	#DIV/0!	#DIV/0!	#DIV/0!	#DIV/0!	#DIV/0!	#DIV/0!	#DIV/0!	#DIV/0!
ath-miR8167c	#DIV/0!	#DIV/0!	#DIV/0!	#DIV/0!	#DIV/0!	#DIV/0!	#DIV/0!	#DIV/0!	#DIV/0!	#DIV/0!	#DIV/0!	#DIV/0!
ath-miR8167d	#DIV/0!	#DIV/0!	#DIV/0!	#DIV/0!	#DIV/0!	#DIV/0!	#DIV/0!	#DIV/0!	#DIV/0!	#DIV/0!	#DIV/0!	#DIV/0!
ath-miR8167e	#DIV/0!	#DIV/0!	#DIV/0!	#DIV/0!	#DIV/0!	#DIV/0!	#DIV/0!	#DIV/0!	#DIV/0!	#DIV/0!	#DIV/0!	#DIV/0!
ath-miR8167f	#DIV/0!	#DIV/0!	#DIV/0!	#DIV/0!	#DIV/0!	#DIV/0!	#DIV/0!	#DIV/0!	#DIV/0!	#DIV/0!	#DIV/0!	#DIV/0!
ath-miR8168	#DIV/0!	#DIV/0!	#DIV/0!	#DIV/0!	#DIV/0!	0	#DIV/0!	#DIV/0!	#DIV/0!	#DIV/0!	#DIV/0!	#DIV/0!
ath-miR8169	#DIV/0!	#DIV/0!	#DIV/0!	#DIV/0!	#DIV/0!	#DIV/0!	#DIV/0!	#DIV/0!	0	#DIV/0!	#DIV/0!	#DIV/0!
ath-miR8170-3p	0	0	0	0	#DIV/0!	0.5	#DIV/0!	#DIV/0!	0	#DIV/0!	#DIV/0!	#DIV/0!
ath-miR8170-5p	#DIV/0!	#DIV/0!	#DIV/0!	#DIV/0!	#DIV/0!	#DIV/0!	#DIV/0!	#DIV/0!	#DIV/0!	#DIV/0!	#DIV/0!	#DIV/0!
ath-miR8171	#DIV/0!	#DIV/0!	#DIV/0!	#DIV/0!	0	#DIV/0!	#DIV/0!	#DIV/0!	#DIV/0!	#DIV/0!	#DIV/0!	#DIV/0!
ath-miR8172	#DIV/0!	#DIV/0!	#DIV/0!	#DIV/0!	#DIV/0!	#DIV/0!	#DIV/0!	#DIV/0!	#DIV/0!	#DIV/0!	#DIV/0!	#DIV/0!
ath-miR8173	#DIV/0!	#DIV/0!	#DIV/0!	#DIV/0!	#DIV/0!	#DIV/0!	#DIV/0!	#DIV/0!	#DIV/0!	#DIV/0!	#DIV/0!	#DIV/0!
ath-miR8174	#DIV/0!	#DIV/0!	#DIV/0!	#DIV/0!	#DIV/0!	#DIV/0!	#DIV/0!	#DIV/0!	#DIV/0!	#DIV/0!	#DIV/0!	#DIV/0!
ath-miR8175	#DIV/0!	#DIV/0!	#DIV/0!	#DIV/0!	#DIV/0!	#DIV/0!	#DIV/0!	#DIV/0!	#DIV/0!	#DIV/0!	#DIV/0!	#DIV/0!
ath-miR8177	#DIV/0!	#DIV/0!	#DIV/0!	#DIV/0!	#DIV/0!	#DIV/0!	#DIV/0!	#DIV/0!	#DIV/0!	#DIV/0!	#DIV/0!	#DIV/0!
ath-miR8178	#DIV/0!	#DIV/0!	#DIV/0!	#DIV/0!	#DIV/0!	#DIV/0!	#DIV/0!	#DIV/0!	#DIV/0!	#DIV/0!	#DIV/0!	#DIV/0!
ath-miR8179	#DIV/0!	0.25	#DIV/0!	#DIV/0!	0.4	0.111111	0.255555	0.204275	0.333333	0	0.166667	0.235702
ath-miR8180	1	#DIV/0!	#DIV/0!	#DIV/0!	0	0.333334	0.166667	0.235703	#DIV/0!	#DIV/0!	#DIV/0!	#DIV/0!
ath-miR8181	#DIV/0!	#DIV/0!	#DIV/0!	#DIV/0!	#DIV/0!	#DIV/0!	#DIV/0!	#DIV/0!	#DIV/0!	#DIV/0!	#DIV/0!	#DIV/0!
ath-miR8182	0.272728	0	0.136364	0.192848	0.333333	0.2	0.266667	0.0942807	0.222222	0	0.111111	0.157135
ath-miR8183	0.358491	0.232558	0.295524	0.0890479	0.294118	0.25	0.272059	0.0311959	0.0909092	0.125	0.107955	0.0241057
ath-miR8184	0.777778	0.666666	0.722222	0.0785681	0	1	0.5	0.707107	#DIV/0!	0	#DIV/0!	#DIV/0!
ath-miR822-3p	0.0882353	0.16	0.124118	0.0507453	0.0526316	0.0615386	0.0570851	0.00629818	0.0754717	0.025641	0.0505564	0.0352356
ath-miR822-5p	0.0566039	0.149254	0.102929	0.0655133	0.185984	0.159625	0.172804	0.0186388	0.132283	0.101031	0.116657	0.0220987
ath-miR823	0.4	0.28863	0.344315	0.0787503	0.216	0.238318	0.227159	0.0157809	0.1875	0.131579	0.159539	0.0395423
ath-miR824-3p	0	0	0	0	0.2	0	0.1	0.141421	0.2	0.111111	0.155555	0.0628541
ath-miR824-5p	0.0493829	0.0895526	0.0694677	0.0284043	0.210526	0.116279	0.163403	0.0666429	0.0890411	0.0725807	0.0808109	0.0116393
ath-miR825	0.0885244	0.0788321	0.0836783	0.00685345	0.0291005	0.0477453	0.0384229	0.0131838	0.0279329	0.023622	0.0257775	0.00304827
ath-miR826a	#DIV/0!	0	#DIV/0!	#DIV/0!	#DIV/0!	#DIV/0!	#DIV/0!	#DIV/0!	0	0	0	0
ath-miR826b	#DIV/0!	#DIV/0!	#DIV/0!	#DIV/0!	#DIV/0!	#DIV/0!	#DIV/0!	#DIV/0!	#DIV/0!	#DIV/0!	#DIV/0!	#DIV/0!
ath-miR827	0	0.105263	0.0526315	0.0744322	0.375	0.318182	0.346591	0.0401766	0.1	0	0.0500001	0.0707108
ath-miR828	0	0.333333	0.166666	0.235702	1	0.454546	0.727273	0.385694	0	0	0	0
ath-miR829-3p.1	#DIV/0!	#DIV/0!	#DIV/0!	#DIV/0!	#DIV/0!	#DIV/0!	#DIV/0!	#DIV/0!	0	#DIV/0!	#DIV/0!	#DIV/0!
ath-miR829-3p.2	0.25	0.125	0.1875	0.0883882	0	0.1	0.05	0.0707107	0	0	0	0
ath-miR829-5p	0	0.2	0.0999998	0.141421	0	0	0	0	0.833333	0.5	0.666666	0.235702
ath-miR830-3p	#DIV/0!	0	#DIV/0!	#DIV/0!	#DIV/0!	0	#DIV/0!	#DIV/0!	#DIV/0!	0	#DIV/0!	#DIV/0!
ath-miR830-5p	0	0	0	0	0	0	0	0	#DIV/0!	0	#DIV/0!	#DIV/0!
ath-miR831-3p	0	0	0	0	0.0634921	0.00502513	0.0342586	0.0413424	0.0454546	0.0769231	0.0611888	0.0222516
ath-miR831-5p	#DIV/0!	#DIV/0!	#DIV/0!	#DIV/0!	#DIV/0!	#DIV/0!	#DIV/0!	#DIV/0!	#DIV/0!	#DIV/0!	#DIV/0!	#DIV/0!
ath-miR832-3p	#DIV/0!	#DIV/0!	#DIV/0!	#DIV/0!	#DIV/0!	#DIV/0!	#DIV/0!	#DIV/0!	#DIV/0!	#DIV/0!	#DIV/0!	#DIV/0!
ath-miR832-5p	#DIV/0!	#DIV/0!	#DIV/0!	#DIV/0!	#DIV/0!	#DIV/0!	#DIV/0!	#DIV/0!	#DIV/0!	#DIV/0!	#DIV/0!	#DIV/0!
ath-miR833a-3p	#DIV/0!	0	#DIV/0!	#DIV/0!	1	1	1	0	#DIV/0!	#DIV/0!	#DIV/0!	#DIV/0!
ath-miR833a-5p	0.163265	0.146739	0.155002	0.0116856	0.357143	0.409638	0.38339	0.0371202	0.344828	0.25	0.297414	0.0670533
ath-miR833b	0.166666	0	0.0833332	0.117851	0.75	0.222222	0.486111	0.373195	0.181818	0	0.0909092	0.128565
ath-miR834	#DIV/0!	0	#DIV/0!	#DIV/0!	1	0	0.5	0.707107	#DIV/0!	#DIV/0!	#DIV/0!	#DIV/0!
ath-miR835-3p	0	0	0	0	#DIV/0!	1	#DIV/0!	#DIV/0!	#DIV/0!	#DIV/0!	#DIV/0!	#DIV/0!
ath-miR835-5p	0	#DIV/0!	#DIV/0!	#DIV/0!	#DIV/0!	0	#DIV/0!	#DIV/0!	0	0	0	0
ath-miR836	#DIV/0!	#DIV/0!	#DIV/0!	#DIV/0!	0	1	0.5	0.707107	#DIV/0!	#DIV/0!	#DIV/0!	#DIV/0!
ath-miR837-3p	#DIV/0!	0	#DIV/0!	#DIV/0!	0.5	0	0.25	0.353553	#DIV/0!	#DIV/0!	#DIV/0!	#DIV/0!
ath-miR837-5p	0	0	0	0	0	0	0	0	#DIV/0!	0	#DIV/0!	#DIV/0!
ath-miR838	0.247525	0.188235	0.21788	0.0419242	0.120879	0.184615	0.152747	0.0450681	0.101123	0.0447763	0.0729499	0.0398435
ath-miR839-5p	0	0	0	0	0	0.0102041	0.00510204	0.00721537	0.0740741	0.0465117	0.0602929	0.0194895
ath-miR840-3p	0.0421688	0.0116279	0.0268984	0.0215957	0.0476191	0.103926	0.0757726	0.0398151	0.0522387	0.0303031	0.0412709	0.0155109
ath-miR840-5p	0	0	0	0	0.5	0.25	0.375	0.176777	1	0	0.5	0.707107
ath-miR841a-3p	0.44	0.319444	0.379722	0.0852457	0.411765	0.335999	0.373882	0.0535744	0.444444	0.2	0.322222	0.172848
ath-miR841a-5p	0.388889	0.210526	0.299708	0.126121	0.625	0.421053	0.523026	0.144212	0.341464	0.225807	0.283635	0.0817817
ath-miR841b-3p	0	0	0	0	0.04	0.0563381	0.0481691	0.0115528	0	0	0	0
ath-miR841b-5p	0.142857	0.142857	0.142857	4.74899e-08	0.4	0.166666	0.283333	0.164992	0.749999	0.5	0.625	0.176776
ath-miR842	0	0	0	0	0.2	0.153846	0.176923	0.0326357	0.222222	0	0.111111	0.157135
ath-miR843	0.0173542	0.0209769	0.0191656	0.00256157	0.112717	0.0994644	0.106091	0.00937085	0.11194	0.146341	0.129141	0.0243254
ath-miR844-3p	0.5	0.5	0.5	3.47003e-07	0.125	0.277778	0.201389	0.10803	0.0909091	0.0769231	0.0839161	0.00988961
ath-miR844-5p	#DIV/0!	#DIV/0!	#DIV/0!	#DIV/0!	#DIV/0!	0	#DIV/0!	#DIV/0!	0	#DIV/0!	#DIV/0!	#DIV/0!
ath-miR845a	0.00455465	0.00322321	0.00388893	0.00094147	0.0116448	0.00893697	0.0102909	0.00191475	0.00651464	0.0195122	0.0130134	0.00919067
ath-miR845b	0.111111	0.072464	0.0917877	0.0273278	0	0.0645161	0.032258	0.0456198	0	0	0	0
ath-miR846-3p	0.0535361	0.0398724	0.0467043	0.0096617	0.0809889	0.0688396	0.0749142	0.00859087	0.0132395	0.0140911	0.0136653	0.000602186
ath-miR846-5p	0.285714	0.241206	0.26346	0.0314722	0.666667	0.517915	0.592291	0.105183	0.266667	0.263158	0.264912	0.00248124
ath-miR847	0.22807	0.186046	0.207058	0.0297155	0.0833333	0.121951	0.102642	0.0273069	0.148936	0.0833334	0.116135	0.0463882
ath-miR848	0.34375	0.342106	0.342928	0.00116278	0.392857	0.385417	0.389137	0.00526117	0.470588	0.275862	0.373225	0.137692
ath-miR849	#DIV/0!	#DIV/0!	#DIV/0!	#DIV/0!	#DIV/0!	#DIV/0!	#DIV/0!	#DIV/0!	#DIV/0!	#DIV/0!	#DIV/0!	#DIV/0!
ath-miR850	0.253271	0.184156	0.218714	0.0488721	0.517857	0.501094	0.509476	0.0118533	0.137255	0.109589	0.123422	0.0195629
ath-miR851-3p	0	0	0	0	#DIV/0!	0	#DIV/0!	#DIV/0!	#DIV/0!	#DIV/0!	#DIV/0!	#DIV/0!
ath-miR851-5p	0.666667	0	0.333334	0.471405	0.25	0.25	0.25	1.39423e-07	0	0	0	0
ath-miR852	#DIV/0!	#DIV/0!	#DIV/0!	#DIV/0!	0	0	0	0	0	0	0	0
ath-miR853	0	0	0	0	0	0.0714286	0.0357143	0.0505076	0	0	0	0
ath-miR855	#DIV/0!	#DIV/0!	#DIV/0!	#DIV/0!	#DIV/0!	#DIV/0!	#DIV/0!	#DIV/0!	#DIV/0!	#DIV/0!	#DIV/0!	#DIV/0!
ath-miR856	#DIV/0!	#DIV/0!	#DIV/0!	#DIV/0!	#DIV/0!	0	#DIV/0!	#DIV/0!	#DIV/0!	#DIV/0!	#DIV/0!	#DIV/0!
ath-miR857	0.215686	0.147058	0.181372	0.0485271	0.280488	0.29918	0.289834	0.0132175	0.195652	0.275	0.235326	0.0561073
ath-miR858a	0.101523	0.100223	0.100873	0.000919366	0.157718	0.180866	0.169292	0.016368	0.0813397	0.0872765	0.0843081	0.00419798
ath-miR858b	0.24	0.284616	0.262308	0.0315482	0.151376	0.187225	0.169301	0.0253488	0.119318	0.0996679	0.109493	0.0138949
ath-miR859	0.4	0	0.2	0.282843	0.4	0.5	0.45	0.0707108	0.200001	0.5	0.35	0.212132
ath-miR860	0	0.157894	0.0789472	0.111648	0.5	0.636364	0.568182	0.0964238	0	0.333333	0.166666	0.235702
ath-miR861-3p	#DIV/0!	#DIV/0!	#DIV/0!	#DIV/0!	#DIV/0!	#DIV/0!	#DIV/0!	#DIV/0!	#DIV/0!	#DIV/0!	#DIV/0!	#DIV/0!
ath-miR861-5p	#DIV/0!	#DIV/0!	#DIV/0!	#DIV/0!	#DIV/0!	#DIV/0!	#DIV/0!	#DIV/0!	#DIV/0!	#DIV/0!	#DIV/0!	#DIV/0!
ath-miR862-3p	#DIV/0!	#DIV/0!	#DIV/0!	#DIV/0!	#DIV/0!	#DIV/0!	#DIV/0!	#DIV/0!	#DIV/0!	#DIV/0!	#DIV/0!	#DIV/0!
ath-miR862-5p	0.0499999	0.129032	0.0895161	0.0558843	0.153846	0.0862071	0.120027	0.0478279	0.105263	0	0.0526316	0.0744323
ath-miR863-3p	0	0	0	0	0.6	0.333333	0.466667	0.188562	0.25	0	0.125	0.176777
ath-miR863-5p	0.0185185	0	0.00925924	0.0130945	0.111111	0.132743	0.121927	0.0152963	0.0238095	0.0344827	0.0291461	0.0075471
ath-miR864-3p	#DIV/0!	#DIV/0!	#DIV/0!	#DIV/0!	#DIV/0!	#DIV/0!	#DIV/0!	#DIV/0!	#DIV/0!	1	#DIV/0!	#DIV/0!
ath-miR864-5p	0	0.153846	0.0769232	0.108786	0.428572	0.266667	0.347619	0.114484	0.166667	0.2	0.183333	0.0235702
ath-miR865-3p	#DIV/0!	#DIV/0!	#DIV/0!	#DIV/0!	#DIV/0!	#DIV/0!	#DIV/0!	#DIV/0!	#DIV/0!	0	#DIV/0!	#DIV/0!
ath-miR865-5p	0	#DIV/0!	#DIV/0!	#DIV/0!	0	0	0	0	#DIV/0!	0	#DIV/0!	#DIV/0!
ath-miR866-3p	0	0	0	0	#DIV/0!	1	#DIV/0!	#DIV/0!	#DIV/0!	#DIV/0!	#DIV/0!	#DIV/0!
ath-miR866-5p	0	0.333334	0.166667	0.235703	0.2	0.333333	0.266667	0.094281	0.571429	0.5	0.535714	0.0505076
ath-miR868-3p	#DIV/0!	#DIV/0!	#DIV/0!	#DIV/0!	#DIV/0!	#DIV/0!	#DIV/0!	#DIV/0!	#DIV/0!	#DIV/0!	#DIV/0!	#DIV/0!
ath-miR868-5p	0	0	0	0	#DIV/0!	0.5	#DIV/0!	#DIV/0!	0	0.5	0.25	0.353553
ath-miR869.1	#DIV/0!	#DIV/0!	#DIV/0!	#DIV/0!	0	#DIV/0!	#DIV/0!	#DIV/0!	0	#DIV/0!	#DIV/0!	#DIV/0!
ath-miR869.2	0.887001	0.867942	0.877472	0.0134768	0.448819	0.547988	0.498403	0.0701228	0.189655	0.121952	0.155803	0.0478736
ath-miR870-3p	0	0	0	0	0.2	0	0.1	0.141421	#DIV/0!	0	#DIV/0!	#DIV/0!
ath-miR870-5p	1	#DIV/0!	#DIV/0!	#DIV/0!	#DIV/0!	#DIV/0!	#DIV/0!	#DIV/0!	#DIV/0!	#DIV/0!	#DIV/0!	#DIV/0!
miR156ij	0.254545	0.174603	0.214574	0.0565278	0.352941	0.494382	0.423662	0.100014	0.47619	0.363636	0.419913	0.079588
miR159a-c	0.14239	0.126836	0.134613	0.0109987	0.247833	0.243995	0.245914	0.00271451	0.26925	0.253984	0.261617	0.0107948
miR167abd	0.314662	0.312131	0.313397	0.00178955	0.418223	0.523826	0.471024	0.0746721	0.486352	0.486222	0.486287	9.20217e-05
miR169a-c	0.142857	0.333333	0.238095	0.134687	0.0625	0.333333	0.197917	0.191508	0.133334	0.5	0.316667	0.259272
miR172a-d	0	0.0238095	0.0119047	0.0168358	0.0234375	0.0560001	0.0397188	0.0230252	0.0436893	0.0666667	0.055178	0.0162475
miR319a-c	0.0246503	0.0116251	0.0181377	0.00921022	0.0729699	0.0690438	0.0710068	0.00277613	0.0407713	0.0401162	0.0404437	0.000463217
miR395a-f	0.00689893	0.0103572	0.00862808	0.00244538	0.0222785	0.0204557	0.0213671	0.00128894	0.033389	0.0337078	0.0335484	0.000225448
miR396ab	0.179307	0.162178	0.170742	0.0121114	0.137994	0.141081	0.139538	0.00218282	0.114987	0.119742	0.117364	0.00336229
miR398a-c	0.00487223	0.00332311	0.00409767	0.00109539	0.00982803	0.00957206	0.00970004	0.000180995	0.0106911	0.00862028	0.00965567	0.00146426
miR399a-f	0.0091324	0.0113895	0.010261	0.00159603	0.0111111	0.0248691	0.0179901	0.0097284	0.0345912	0.058201	0.0463961	0.0166946

## Sheet: AGO1 IP-Ratio-TA-only
S4 Data. Composition of miRNA forms in AGO1 and AGO10 IP treated with SDN1 and SDN1 catalytic mutant (SDN1-D283A).
	AGO1 IP (Mock)				AGO1 IP (SDN1)				AGO1 IP (SDN1-D283A)
miRNAs	br1	br2	Mean	Stdev	br1	br2	Mean	Stdev	br1	br2	Mean	Stdev
ath-miR156a-3p	0	0	0	0	0	0	0	0	0	#DIV/0!	#DIV/0!	#DIV/0!
ath-miR156a-5p	0.0966456	0.0951259	0.0958857	0.0010746	0.0631978	0.0540567	0.0586272	0.00646375	0.0764067	0.076293	0.0763499	8.04246e-05
ath-miR156b-3p	0.00501253	0.00442758	0.00472005	0.00041362	0.0137181	0.0132707	0.0134944	0.000316314	0.0282486	0.0293282	0.0287884	0.000763391
ath-miR156b-5p	0.0966456	0.0951259	0.0958857	0.0010746	0.0631978	0.0540567	0.0586272	0.00646375	0.0764067	0.076293	0.0763499	8.04246e-05
ath-miR156c-3p	0	0	0	0	#DIV/0!	0	#DIV/0!	#DIV/0!	0	0	0	0
ath-miR156c-5p	0.0966456	0.0951259	0.0958857	0.0010746	0.0631978	0.0540567	0.0586272	0.00646375	0.0764067	0.076293	0.0763499	8.04246e-05
ath-miR156d-3p	#DIV/0!	#DIV/0!	#DIV/0!	#DIV/0!	#DIV/0!	#DIV/0!	#DIV/0!	#DIV/0!	#DIV/0!	#DIV/0!	#DIV/0!	#DIV/0!
ath-miR156d-5p	0.0966456	0.0951259	0.0958857	0.0010746	0.0631978	0.0540567	0.0586272	0.00646375	0.0764067	0.076293	0.0763499	8.04246e-05
ath-miR156e	0.0966456	0.0951259	0.0958857	0.0010746	0.0631978	0.0540567	0.0586272	0.00646375	0.0764067	0.076293	0.0763499	8.04246e-05
ath-miR156f-3p	#DIV/0!	#DIV/0!	#DIV/0!	#DIV/0!	#DIV/0!	#DIV/0!	#DIV/0!	#DIV/0!	#DIV/0!	#DIV/0!	#DIV/0!	#DIV/0!
ath-miR156f-5p	0.0966456	0.0951259	0.0958857	0.0010746	0.0631978	0.0540567	0.0586272	0.00646375	0.0764067	0.076293	0.0763499	8.04246e-05
ath-miR156g	0.0797545	0.0909091	0.0853318	0.00788749	0.0588235	0.0932835	0.0760535	0.0243669	0	0.228571	0.114286	0.161624
ath-miR156h	0.333334	0.285714	0.309524	0.0336718	0	0.333333	0.166667	0.235702	0.4	0.5	0.45	0.0707107
ath-miR156i	0	0	0	0	0	0	0	0	0	0	0	0
ath-miR156j	0	0	0	0	0	0	0	0	0	0	0	0
ath-miR157a-3p	0.142857	0.105263	0.12406	0.0265832	0	0	0	0	0.25	0	0.125	0.176777
ath-miR157a-5p	0.0168806	0.0138249	0.0153528	0.00216073	0.0202872	0.0166465	0.0184668	0.00257432	0.0317713	0.0353403	0.0335558	0.00252373
ath-miR157b-3p	0.142857	0.105263	0.12406	0.0265832	0	0	0	0	0.25	0	0.125	0.176777
ath-miR157b-5p	0.0168806	0.0138249	0.0153528	0.00216073	0.0202872	0.0166465	0.0184668	0.00257432	0.0317713	0.0353403	0.0335558	0.00252373
ath-miR157c-3p	0.151724	0.096774	0.124249	0.0388555	0.0333333	0.114865	0.0740991	0.0576516	0.193548	0.210526	0.202037	0.0120049
ath-miR157c-5p	0.0168806	0.0138249	0.0153528	0.00216073	0.0202872	0.0166465	0.0184668	0.00257432	0.0317713	0.0353403	0.0335558	0.00252373
ath-miR157d	0.0505952	0.0447059	0.0476506	0.00416439	0.0599077	0.0409252	0.0504165	0.0134227	0.0454546	0.0963856	0.0709201	0.0360137
ath-miR158a-3p	0.0502514	0.0473528	0.0488021	0.00204966	0.0204512	0.025104	0.0227776	0.00329003	0.0501826	0.0510674	0.050625	0.000625656
ath-miR158a-5p	0.116162	0.09887	0.107516	0.0122271	0.0701754	0.03125	0.0507127	0.0275244	0.133333	0.130435	0.131884	0.00204942
ath-miR158b	0.0633298	0.0592494	0.0612896	0.00288531	0.0145349	0.0267815	0.0206582	0.00865968	0.0584331	0.0522764	0.0553547	0.00435342
ath-miR159a	0.0114199	0.0110549	0.0112374	0.000258085	0.0151096	0.0144602	0.0147849	0.000459164	0.0201429	0.0194741	0.0198085	0.000472909
ath-miR159b-3p	0.0491926	0.0524689	0.0508307	0.00231664	0.0124362	0.0132093	0.0128228	0.000546647	0.0217583	0.0212471	0.0215027	0.000361478
ath-miR159b-5p	0	0	0	0	0	0	0	0	0	0	0	0
ath-miR159c	0.000841386	0.000806513	0.00082395	2.46595e-05	0.000350815	0.000329647	0.000340231	1.49677e-05	0.000618218	0.00098824	0.000803229	0.000261645
ath-miR160a-3p	#DIV/0!	#DIV/0!	#DIV/0!	#DIV/0!	0	#DIV/0!	#DIV/0!	#DIV/0!	#DIV/0!	#DIV/0!	#DIV/0!	#DIV/0!
ath-miR160a-5p	0	0.00106101	0.000530504	0.000750246	0.0145631	0.00869431	0.0116287	0.00414987	0.0209399	0.0160906	0.0185153	0.00342899
ath-miR160b	0	0.00106101	0.000530504	0.000750246	0.0145631	0.00869431	0.0116287	0.00414987	0.0209399	0.0160906	0.0185153	0.00342899
ath-miR160c-3p	#DIV/0!	0	#DIV/0!	#DIV/0!	0	0	0	0	#DIV/0!	0	#DIV/0!	#DIV/0!
ath-miR160c-5p	0	0.00106101	0.000530504	0.000750246	0.0145631	0.00869431	0.0116287	0.00414987	0.0209399	0.0160906	0.0185153	0.00342899
ath-miR161.1	0.000362818	0.000434391	0.000398605	5.06098e-05	0.0025829	0.00198873	0.00228581	0.000420146	0.00439921	0.00527606	0.00483764	0.000620026
ath-miR161.2	0.328063	0.289694	0.308879	0.0271314	0.205128	0.231075	0.218102	0.0183474	0.230769	0.189944	0.210357	0.0288678
ath-miR162a-3p	0.0149945	0.0211566	0.0180755	0.00435728	0.0280487	0.0277252	0.0278869	0.000228718	0.0612018	0.0657585	0.0634801	0.00322206
ath-miR162a-5p	0	0	0	0	0.00347222	0.00092251	0.00219737	0.00180292	0.00854701	0	0.0042735	0.00604365
ath-miR162b-3p	0.0149945	0.0211566	0.0180755	0.00435728	0.0280487	0.0277252	0.0278869	0.000228718	0.0612018	0.0657585	0.0634801	0.00322206
ath-miR162b-5p	0	0	0	0	0.00347222	0.00092251	0.00219737	0.00180292	0.00854701	0	0.0042735	0.00604365
ath-miR163	0.0289993	0.0343164	0.0316579	0.00375974	0.0157587	0.0154083	0.0155835	0.000247815	0.036252	0.0383635	0.0373077	0.00149304
ath-miR164a	0.00115119	0.0027313	0.00194125	0.00111731	0.0182563	0.0156635	0.0169599	0.00183343	0.0210441	0.016529	0.0187866	0.0031927
ath-miR164b-3p	0	0	0	0	0	0	0	0	0	0	0	0
ath-miR164b-5p	0.00115119	0.0027313	0.00194125	0.00111731	0.0182563	0.0156635	0.0169599	0.00183343	0.0210441	0.016529	0.0187866	0.0031927
ath-miR164c-3p	0	0	0	0	0	0	0	0	0	0	0	0
ath-miR164c-5p	0.00197368	0.00747666	0.00472517	0.00389119	0.00606586	0.00555415	0.00581	0.000361836	0.0151515	0.0125196	0.0138355	0.00186107
ath-miR165a-3p	0.0137758	0.0111387	0.0124573	0.00186469	0.0218474	0.015805	0.0188262	0.00427268	0.0275972	0.0287601	0.0281787	0.000822296
ath-miR165a-5p	0	#DIV/0!	#DIV/0!	#DIV/0!	1	0	0.5	0.707107	#DIV/0!	#DIV/0!	#DIV/0!	#DIV/0!
ath-miR165b	0.0137758	0.0111387	0.0124573	0.00186469	0.0218474	0.015805	0.0188262	0.00427268	0.0275972	0.0287601	0.0281787	0.000822296
ath-miR166a-3p	0.02139	0.0193309	0.0203605	0.00145603	0.0359004	0.0248414	0.0303709	0.0078199	0.048575	0.0507086	0.0496418	0.00150874
ath-miR166a-5p	#DIV/0!	0	#DIV/0!	#DIV/0!	0	0.333333	0.166667	0.235702	#DIV/0!	0	#DIV/0!	#DIV/0!
ath-miR166b-3p	0.02139	0.0193309	0.0203605	0.00145603	0.0359004	0.0248414	0.0303709	0.0078199	0.048575	0.0507086	0.0496418	0.00150874
ath-miR166b-5p	#DIV/0!	0	#DIV/0!	#DIV/0!	0	0.333333	0.166667	0.235702	#DIV/0!	0	#DIV/0!	#DIV/0!
ath-miR166c	0.02139	0.0193309	0.0203605	0.00145603	0.0359004	0.0248414	0.0303709	0.0078199	0.048575	0.0507086	0.0496418	0.00150874
ath-miR166d	0.02139	0.0193309	0.0203605	0.00145603	0.0359004	0.0248414	0.0303709	0.0078199	0.048575	0.0507086	0.0496418	0.00150874
ath-miR166e-3p	0.02139	0.0193309	0.0203605	0.00145603	0.0359004	0.0248414	0.0303709	0.0078199	0.048575	0.0507086	0.0496418	0.00150874
ath-miR166e-5p	#DIV/0!	#DIV/0!	#DIV/0!	#DIV/0!	#DIV/0!	#DIV/0!	#DIV/0!	#DIV/0!	#DIV/0!	#DIV/0!	#DIV/0!	#DIV/0!
ath-miR166f	0.02139	0.0193309	0.0203605	0.00145603	0.0359004	0.0248414	0.0303709	0.0078199	0.048575	0.0507086	0.0496418	0.00150874
ath-miR166g	0.02139	0.0193309	0.0203605	0.00145603	0.0359004	0.0248414	0.0303709	0.0078199	0.048575	0.0507086	0.0496418	0.00150874
ath-miR167a-3p	#DIV/0!	#DIV/0!	#DIV/0!	#DIV/0!	0	0.4	0.2	0.282843	0	0	0	0
ath-miR167a-5p	0.00190115	0.000750588	0.00132587	0.000813567	0.0139081	0.0166179	0.015263	0.00191609	0.0349519	0.0336954	0.0343236	0.000888452
ath-miR167b	0.00190115	0.000750588	0.00132587	0.000813567	0.0139081	0.0166179	0.015263	0.00191609	0.0349519	0.0336954	0.0343236	0.000888452
ath-miR167c-3p	0	0.000300841	0.000150421	0.000212727	0	0	0	0	0.0041841	0	0.00209205	0.00295861
ath-miR167c-5p	0.0566038	0.0597015	0.0581527	0.0021904	0.0125	0.0315458	0.0220229	0.0134674	0.0446428	0.0425532	0.043598	0.00147762
ath-miR167d	0.00196299	0.00265828	0.00231064	0.000491645	0.00382902	0.00307947	0.00345425	0.000530015	0.011086	0.00876707	0.00992654	0.00163975
ath-miR168a-3p	0.0115607	0.0328637	0.0222122	0.0150635	0	0	0	0	0	0	0	0
ath-miR168a-5p	0.0164317	0.0159711	0.0162014	0.00032567	0.0338296	0.0298464	0.031838	0.00281655	0.0466182	0.0534011	0.0500097	0.00479622
ath-miR168b-3p	0.0833333	0	0.0416667	0.0589255	#DIV/0!	0	#DIV/0!	#DIV/0!	0	#DIV/0!	#DIV/0!	#DIV/0!
ath-miR168b-5p	0.0164317	0.0159711	0.0162014	0.00032567	0.0338296	0.0298464	0.031838	0.00281655	0.0466182	0.0534011	0.0500097	0.00479622
ath-miR169a-3p	#DIV/0!	#DIV/0!	#DIV/0!	#DIV/0!	#DIV/0!	#DIV/0!	#DIV/0!	#DIV/0!	#DIV/0!	#DIV/0!	#DIV/0!	#DIV/0!
ath-miR169a-5p	0	0	0	0	0.1	0.0769231	0.0884616	0.0163179	0.0909093	0.111111	0.10101	0.0142848
ath-miR169b-3p	#DIV/0!	#DIV/0!	#DIV/0!	#DIV/0!	#DIV/0!	#DIV/0!	#DIV/0!	#DIV/0!	#DIV/0!	#DIV/0!	#DIV/0!	#DIV/0!
ath-miR169b-5p	0	0	0	0	0	0	0	0	0	0	0	0
ath-miR169c	0	0	0	0	0	0	0	0	0	0	0	0
ath-miR169d	#DIV/0!	0	#DIV/0!	#DIV/0!	#DIV/0!	#DIV/0!	#DIV/0!	#DIV/0!	0	#DIV/0!	#DIV/0!	#DIV/0!
ath-miR169e	#DIV/0!	0	#DIV/0!	#DIV/0!	#DIV/0!	#DIV/0!	#DIV/0!	#DIV/0!	0	#DIV/0!	#DIV/0!	#DIV/0!
ath-miR169f-3p	0	#DIV/0!	#DIV/0!	#DIV/0!	#DIV/0!	#DIV/0!	#DIV/0!	#DIV/0!	0	#DIV/0!	#DIV/0!	#DIV/0!
ath-miR169f-5p	#DIV/0!	0	#DIV/0!	#DIV/0!	#DIV/0!	#DIV/0!	#DIV/0!	#DIV/0!	0	#DIV/0!	#DIV/0!	#DIV/0!
ath-miR169g-3p	#DIV/0!	#DIV/0!	#DIV/0!	#DIV/0!	#DIV/0!	#DIV/0!	#DIV/0!	#DIV/0!	#DIV/0!	#DIV/0!	#DIV/0!	#DIV/0!
ath-miR169g-5p	#DIV/0!	0	#DIV/0!	#DIV/0!	#DIV/0!	#DIV/0!	#DIV/0!	#DIV/0!	0	#DIV/0!	#DIV/0!	#DIV/0!
ath-miR169h	0	0	0	0	0	0	0	0	0	0.285714	0.142857	0.20203
ath-miR169i	0	0	0	0	0	0	0	0	0	0.285714	0.142857	0.20203
ath-miR169j	0	0	0	0	0	0	0	0	0	0.285714	0.142857	0.20203
ath-miR169k	0	0	0	0	0	0	0	0	0	0.285714	0.142857	0.20203
ath-miR169l	0	0	0	0	0	0	0	0	0	0.285714	0.142857	0.20203
ath-miR169m	0	0	0	0	0	0	0	0	0	0.285714	0.142857	0.20203
ath-miR169n	0	0	0	0	0	0	0	0	0	0.285714	0.142857	0.20203
ath-miR170-3p	#DIV/0!	0	#DIV/0!	#DIV/0!	0	0.0799999	0.0399999	0.0565685	0.0250001	0.0238096	0.0244048	0.000841832
ath-miR170-5p	0.0126183	0.01125	0.0119342	0.00096757	0.02058	0.0137336	0.0171568	0.00484112	0.0418008	0.0357143	0.0387576	0.00430378
ath-miR171a-3p	0	0	0	0	0.0089686	0.032967	0.0209678	0.0169694	0.0367348	0.0353536	0.0360442	0.000976676
ath-miR171a-5p	0.0126183	0.01125	0.0119342	0.00096757	0.02058	0.0137336	0.0171568	0.00484112	0.0418008	0.0357143	0.0387576	0.00430378
ath-miR171b-3p	0.0372342	0.0334927	0.0353634	0.00264558	0.111111	0.0957446	0.103428	0.0108657	0.170731	0.231441	0.201086	0.042928
ath-miR171b-5p	0	0	0	0	0	0	0	0	#DIV/0!	#DIV/0!	#DIV/0!	#DIV/0!
ath-miR171c-3p	0.0372342	0.0334927	0.0353634	0.00264558	0.111111	0.0957446	0.103428	0.0108657	0.170731	0.231441	0.201086	0.042928
ath-miR171c-5p	0	0	0	0	0	0	0	0	#DIV/0!	#DIV/0!	#DIV/0!	#DIV/0!
ath-miR172a	0.411766	0.27027	0.341018	0.100053	0.126126	0.107623	0.116875	0.0130834	0.137363	0.132911	0.135137	0.0031476
ath-miR172b-3p	0.411766	0.27027	0.341018	0.100053	0.126126	0.107623	0.116875	0.0130834	0.137363	0.132911	0.135137	0.0031476
ath-miR172b-5p	#DIV/0!	#DIV/0!	#DIV/0!	#DIV/0!	#DIV/0!	#DIV/0!	#DIV/0!	#DIV/0!	#DIV/0!	#DIV/0!	#DIV/0!	#DIV/0!
ath-miR172c	0	0.166667	0.0833333	0.117851	0	0	0	0	0.0909088	0.0294118	0.0601603	0.043485
ath-miR172d-3p	0	0.166667	0.0833333	0.117851	0	0	0	0	0.0909088	0.0294118	0.0601603	0.043485
ath-miR172d-5p	#DIV/0!	#DIV/0!	#DIV/0!	#DIV/0!	#DIV/0!	#DIV/0!	#DIV/0!	#DIV/0!	#DIV/0!	#DIV/0!	#DIV/0!	#DIV/0!
ath-miR172e-3p	#DIV/0!	0	#DIV/0!	#DIV/0!	0.333333	0	0.166667	0.235702	0.125	0	0.0625	0.0883883
ath-miR172e-5p	#DIV/0!	#DIV/0!	#DIV/0!	#DIV/0!	#DIV/0!	#DIV/0!	#DIV/0!	#DIV/0!	#DIV/0!	#DIV/0!	#DIV/0!	#DIV/0!
ath-miR173-3p	0	0	0	0	0	0	0	0	0	0.0666666	0.0333333	0.0471404
ath-miR173-5p	0.030888	0.0143472	0.0226176	0.0116962	0.007874	0.0070933	0.00748365	0.000552044	0.027027	0.0319672	0.0294971	0.00349323
ath-miR1886.1	0	0	0	0	#DIV/0!	0	#DIV/0!	#DIV/0!	0	0	0	0
ath-miR1886.2	0	0.0188679	0.00943394	0.0133416	0.0322581	0.0458715	0.0390648	0.00962617	0.021978	0.0357143	0.0288462	0.00971299
ath-miR1886.3	#DIV/0!	#DIV/0!	#DIV/0!	#DIV/0!	#DIV/0!	#DIV/0!	#DIV/0!	#DIV/0!	#DIV/0!	#DIV/0!	#DIV/0!	#DIV/0!
ath-miR1888a	0.266129	0.201923	0.234026	0.0454004	0.162162	0.0788381	0.1205	0.058919	0.155844	0.131148	0.143496	0.0174631
ath-miR1888b	0.142857	0.076923	0.10989	0.0466221	#DIV/0!	0.125	#DIV/0!	#DIV/0!	0	0	0	0
ath-miR2111a-3p	#DIV/0!	#DIV/0!	#DIV/0!	#DIV/0!	#DIV/0!	#DIV/0!	#DIV/0!	#DIV/0!	0	#DIV/0!	#DIV/0!	#DIV/0!
ath-miR2111a-5p	#DIV/0!	#DIV/0!	#DIV/0!	#DIV/0!	0	0	0	0	0	0	0	0
ath-miR2111b-3p	#DIV/0!	#DIV/0!	#DIV/0!	#DIV/0!	#DIV/0!	0	#DIV/0!	#DIV/0!	0	#DIV/0!	#DIV/0!	#DIV/0!
ath-miR2111b-5p	#DIV/0!	#DIV/0!	#DIV/0!	#DIV/0!	0	0	0	0	0	0	0	0
ath-miR2112-3p	0	0	0	0	0	0	0	0	0	0.142857	0.0714285	0.101015
ath-miR2112-5p	#DIV/0!	#DIV/0!	#DIV/0!	#DIV/0!	#DIV/0!	#DIV/0!	#DIV/0!	#DIV/0!	#DIV/0!	#DIV/0!	#DIV/0!	#DIV/0!
ath-miR2933a	#DIV/0!	#DIV/0!	#DIV/0!	#DIV/0!	#DIV/0!	#DIV/0!	#DIV/0!	#DIV/0!	#DIV/0!	#DIV/0!	#DIV/0!	#DIV/0!
ath-miR2933b	#DIV/0!	#DIV/0!	#DIV/0!	#DIV/0!	#DIV/0!	#DIV/0!	#DIV/0!	#DIV/0!	#DIV/0!	#DIV/0!	#DIV/0!	#DIV/0!
ath-miR2934-3p	#DIV/0!	#DIV/0!	#DIV/0!	#DIV/0!	#DIV/0!	0	#DIV/0!	#DIV/0!	#DIV/0!	#DIV/0!	#DIV/0!	#DIV/0!
ath-miR2934-5p	0	0	0	0	0	0	0	0	0	0	0	0
ath-miR2936	#DIV/0!	#DIV/0!	#DIV/0!	#DIV/0!	1	#DIV/0!	#DIV/0!	#DIV/0!	#DIV/0!	#DIV/0!	#DIV/0!	#DIV/0!
ath-miR2939	#DIV/0!	#DIV/0!	#DIV/0!	#DIV/0!	#DIV/0!	#DIV/0!	#DIV/0!	#DIV/0!	#DIV/0!	#DIV/0!	#DIV/0!	#DIV/0!
ath-miR319a	0.257887	0.297465	0.277676	0.0279856	0.246792	0.236376	0.241584	0.00736528	0.269311	0.264325	0.266818	0.00352567
ath-miR319b	0.257887	0.297465	0.277676	0.0279856	0.246792	0.236376	0.241584	0.00736528	0.269311	0.264325	0.266818	0.00352567
ath-miR319c	0.0185606	0.0221645	0.0203626	0.00254832	0.0180927	0.0163138	0.0172033	0.00125794	0.020062	0.0223033	0.0211826	0.00158484
ath-miR3434-3p	#DIV/0!	#DIV/0!	#DIV/0!	#DIV/0!	#DIV/0!	#DIV/0!	#DIV/0!	#DIV/0!	#DIV/0!	#DIV/0!	#DIV/0!	#DIV/0!
ath-miR3434-5p	#DIV/0!	#DIV/0!	#DIV/0!	#DIV/0!	#DIV/0!	#DIV/0!	#DIV/0!	#DIV/0!	#DIV/0!	#DIV/0!	#DIV/0!	#DIV/0!
ath-miR3440b-3p	0	0	0	0	0	0.0476191	0.0238095	0.0336718	0	0.111111	0.0555556	0.0785674
ath-miR3440b-5p	#DIV/0!	0	#DIV/0!	#DIV/0!	0	0	0	0	0	0	0	0
ath-miR390a-3p	0	0	0	0	0	0	0	0	0	0.142857	0.0714285	0.101015
ath-miR390a-5p	0	0	0	0	0.031579	0.025	0.0282895	0.004652	0.0153846	0	0.00769231	0.0108786
ath-miR390b-3p	0	0	0	0	0	0	0	0	0	0	0	0
ath-miR390b-5p	0	0	0	0	0.031579	0.025	0.0282895	0.004652	0.0153846	0	0.00769231	0.0108786
ath-miR391-3p	#DIV/0!	#DIV/0!	#DIV/0!	#DIV/0!	#DIV/0!	0	#DIV/0!	#DIV/0!	#DIV/0!	#DIV/0!	#DIV/0!	#DIV/0!
ath-miR391-5p	0	0	0	0	0.00854701	0.0111857	0.00986636	0.00186585	0.0253968	0.0122951	0.018846	0.00926435
ath-miR3932a	#DIV/0!	#DIV/0!	#DIV/0!	#DIV/0!	#DIV/0!	#DIV/0!	#DIV/0!	#DIV/0!	#DIV/0!	#DIV/0!	#DIV/0!	#DIV/0!
ath-miR3932b-3p	#DIV/0!	#DIV/0!	#DIV/0!	#DIV/0!	#DIV/0!	#DIV/0!	#DIV/0!	#DIV/0!	#DIV/0!	#DIV/0!	#DIV/0!	#DIV/0!
ath-miR3932b-5p	0.00252336	0.00304096	0.00278216	0.000366001	0.00140122	0.00192654	0.00166388	0.00037146	0.00892856	0.00644123	0.00768489	0.0017588
ath-miR3933	#DIV/0!	#DIV/0!	#DIV/0!	#DIV/0!	#DIV/0!	#DIV/0!	#DIV/0!	#DIV/0!	#DIV/0!	#DIV/0!	#DIV/0!	#DIV/0!
ath-miR393a-3p	0	0	0	0	0	0	0	0	0	0	0	0
ath-miR393a-5p	0	0	0	0	0.0102041	0.0111111	0.0106576	0.000641363	0.0176212	0.0229885	0.0203048	0.00379527
ath-miR393b-3p	0.0128755	0.0386099	0.0257427	0.018197	0.0324675	0.0307263	0.0315969	0.00123124	0.0225563	0.0370371	0.0297967	0.0102395
ath-miR393b-5p	0	0	0	0	0.0102041	0.0111111	0.0106576	0.000641363	0.0176212	0.0229885	0.0203048	0.00379527
ath-miR394a	0.0259741	0.0200573	0.0230157	0.00418384	0.0114025	0.0135939	0.0124982	0.00154956	0.0172288	0.0210889	0.0191588	0.0027295
ath-miR394b-3p	#DIV/0!	#DIV/0!	#DIV/0!	#DIV/0!	#DIV/0!	#DIV/0!	#DIV/0!	#DIV/0!	#DIV/0!	#DIV/0!	#DIV/0!	#DIV/0!
ath-miR394b-5p	0.0259741	0.0200573	0.0230157	0.00418384	0.0114025	0.0135939	0.0124982	0.00154956	0.0172288	0.0210889	0.0191588	0.0027295
ath-miR395a	0.000781861	0.000720332	0.000751096	4.35077e-05	0.00373732	0.00640787	0.0050726	0.00188836	0.0168879	0.0176056	0.0172467	0.000507541
ath-miR395b	0.00804171	0.00870344	0.00837257	0.000467915	0.0142789	0.013507	0.013893	0.000545851	0.0287957	0.00420167	0.0164987	0.0173906
ath-miR395c	0.00804171	0.00870344	0.00837257	0.000467915	0.0142789	0.013507	0.013893	0.000545851	0.0287957	0.00420167	0.0164987	0.0173906
ath-miR395d	0.000781861	0.000720332	0.000751096	4.35077e-05	0.00373732	0.00640787	0.0050726	0.00188836	0.0168879	0.0176056	0.0172467	0.000507541
ath-miR395e	0.000781861	0.000720332	0.000751096	4.35077e-05	0.00373732	0.00640787	0.0050726	0.00188836	0.0168879	0.0176056	0.0172467	0.000507541
ath-miR395f	0.00804171	0.00870344	0.00837257	0.000467915	0.0142789	0.013507	0.013893	0.000545851	0.0287957	0.00420167	0.0164987	0.0173906
ath-miR396a-3p	0.00113679	0.00125235	0.00119457	8.17097e-05	0.0278422	0.0167015	0.0222719	0.00787769	0.0222222	0	0.0111111	0.0157135
ath-miR396a-5p	0.000912851	0.00126525	0.00108905	0.000249181	0.00487685	0.0039458	0.00441132	0.000658354	0.0109449	0.0104216	0.0106833	0.000370009
ath-miR396b-3p	0.00809719	0.00621118	0.00715419	0.00133361	0.0215517	0.0116731	0.0166124	0.00698522	0.0300429	0.0538462	0.0419445	0.0168315
ath-miR396b-5p	0.00483913	0.00453828	0.0046887	0.000212734	0.0084901	0.00780482	0.00814746	0.000484562	0.0180197	0.0182881	0.0181539	0.000189815
ath-miR397a	0	0	0	0	0	0.00722022	0.00361011	0.00510546	0.0350877	0.0306123	0.03285	0.00316457
ath-miR397b	0	0	0	0	0.037037	0.0875002	0.0622686	0.0356828	0.097345	0.112245	0.104795	0.0105358
ath-miR398a-3p	0.000626304	0.000449894	0.000538099	0.000124741	0.000382556	0.000492153	0.000437354	7.74973e-05	0.00228702	0.00252675	0.00240689	0.000169517
ath-miR398a-5p	#DIV/0!	#DIV/0!	#DIV/0!	#DIV/0!	#DIV/0!	#DIV/0!	#DIV/0!	#DIV/0!	#DIV/0!	#DIV/0!	#DIV/0!	#DIV/0!
ath-miR398b-3p	0.000194506	0.000148007	0.000171257	3.28801e-05	0.000803699	0.000468724	0.000636212	0.000236864	0.00145347	0.00178694	0.0016202	0.000235801
ath-miR398b-5p	#DIV/0!	#DIV/0!	#DIV/0!	#DIV/0!	0	0	0	0	0	#DIV/0!	#DIV/0!	#DIV/0!
ath-miR398c-3p	0.000194506	0.000148007	0.000171257	3.28801e-05	0.000803699	0.000468724	0.000636212	0.000236864	0.00145347	0.00178694	0.0016202	0.000235801
ath-miR398c-5p	#DIV/0!	#DIV/0!	#DIV/0!	#DIV/0!	0	0	0	0	0	#DIV/0!	#DIV/0!	#DIV/0!
ath-miR399a	0	0	0	0	0.2	0	0.1	0.141421	0.111111	0	0.0555556	0.0785675
ath-miR399b	0	0.0046083	0.00230415	0.00325856	0.0113636	0.00694445	0.00915405	0.00312483	0.0171233	0.00609756	0.0116104	0.00779635
ath-miR399c-3p	0	0.0046083	0.00230415	0.00325856	0.0113636	0.00694445	0.00915405	0.00312483	0.0171233	0.00609756	0.0116104	0.00779635
ath-miR399c-5p	#DIV/0!	#DIV/0!	#DIV/0!	#DIV/0!	#DIV/0!	#DIV/0!	#DIV/0!	#DIV/0!	#DIV/0!	#DIV/0!	#DIV/0!	#DIV/0!
ath-miR399d	0	0	0	0	#DIV/0!	0.0714286	#DIV/0!	#DIV/0!	0	0.153846	0.076923	0.108786
ath-miR399e	0	0	0	0	#DIV/0!	0	#DIV/0!	#DIV/0!	0.5	0	0.25	0.353553
ath-miR399f	#DIV/0!	0	#DIV/0!	#DIV/0!	0	0	0	0	0.1	0	0.05	0.0707107
ath-miR400	0	0	0	0	0	0.0999999	0.0499999	0.0707106	0.0625001	0.142857	0.102679	0.0568209
ath-miR402	0	0	0	0	0	0	0	0	0	0	0	0
ath-miR403-3p	0.034242	0.028216	0.031229	0.00426102	0.0497755	0.0405285	0.045152	0.00653859	0.0565608	0.0533868	0.0549738	0.00224435
ath-miR403-5p	0.0796178	0.0918918	0.0857548	0.00867901	0.0103093	0.0203327	0.015321	0.00708764	0.0285715	0.0121952	0.0203834	0.0115798
ath-miR404	#DIV/0!	#DIV/0!	#DIV/0!	#DIV/0!	0	0	0	0	0	0	0	0
ath-miR406	#DIV/0!	#DIV/0!	#DIV/0!	#DIV/0!	0	#DIV/0!	#DIV/0!	#DIV/0!	0	#DIV/0!	#DIV/0!	#DIV/0!
ath-miR408-3p	4.7688e-05	3.29449e-05	4.03164e-05	1.0425e-05	0.00240529	0.00127528	0.00184029	0.000799038	0.00615358	0.00682989	0.00649174	0.000478228
ath-miR408-5p	0.0155926	0.0168365	0.0162146	0.000879598	0.0167903	0.0137764	0.0152834	0.00213115	0.0227273	0.0307054	0.0267163	0.00564135
ath-miR419	#DIV/0!	#DIV/0!	#DIV/0!	#DIV/0!	#DIV/0!	#DIV/0!	#DIV/0!	#DIV/0!	0	#DIV/0!	#DIV/0!	#DIV/0!
ath-miR4221	#DIV/0!	0	#DIV/0!	#DIV/0!	0	0	0	0	0	#DIV/0!	#DIV/0!	#DIV/0!
ath-miR4227	#DIV/0!	#DIV/0!	#DIV/0!	#DIV/0!	0	#DIV/0!	#DIV/0!	#DIV/0!	#DIV/0!	0	#DIV/0!	#DIV/0!
ath-miR4228-3p	0	0	0	0	0	0	0	0	0	0	0	0
ath-miR4228-5p	#DIV/0!	#DIV/0!	#DIV/0!	#DIV/0!	0	#DIV/0!	#DIV/0!	#DIV/0!	#DIV/0!	#DIV/0!	#DIV/0!	#DIV/0!
ath-miR4239	#DIV/0!	#DIV/0!	#DIV/0!	#DIV/0!	#DIV/0!	#DIV/0!	#DIV/0!	#DIV/0!	#DIV/0!	#DIV/0!	#DIV/0!	#DIV/0!
ath-miR4243	#DIV/0!	#DIV/0!	#DIV/0!	#DIV/0!	#DIV/0!	1	#DIV/0!	#DIV/0!	0	#DIV/0!	#DIV/0!	#DIV/0!
ath-miR4245	#DIV/0!	#DIV/0!	#DIV/0!	#DIV/0!	0	#DIV/0!	#DIV/0!	#DIV/0!	#DIV/0!	#DIV/0!	#DIV/0!	#DIV/0!
ath-miR447a-3p	0.027897	0.019863	0.02388	0.00568086	0.033195	0.0255828	0.0293889	0.00538268	0.0584415	0.0347826	0.046612	0.0167294
ath-miR447a.2-3p	0.241379	0.174475	0.207927	0.0473087	0.0238095	0.0292506	0.0265301	0.00384743	0.0902021	0.0948121	0.0925071	0.00325974
ath-miR447b	0.027897	0.019863	0.02388	0.00568086	0.033195	0.0255828	0.0293889	0.00538268	0.0584415	0.0347826	0.046612	0.0167294
ath-miR447c-3p	#DIV/0!	#DIV/0!	#DIV/0!	#DIV/0!	#DIV/0!	0	#DIV/0!	#DIV/0!	#DIV/0!	#DIV/0!	#DIV/0!	#DIV/0!
ath-miR447c-5p	#DIV/0!	#DIV/0!	#DIV/0!	#DIV/0!	#DIV/0!	#DIV/0!	#DIV/0!	#DIV/0!	#DIV/0!	#DIV/0!	#DIV/0!	#DIV/0!
ath-miR472-3p	0.0383419	0.0259876	0.0321647	0.00873581	0.032634	0.0226434	0.0276387	0.00706438	0.0428335	0.033079	0.0379562	0.00689747
ath-miR472-5p	0	#DIV/0!	#DIV/0!	#DIV/0!	0	0	0	0	#DIV/0!	0	#DIV/0!	#DIV/0!
ath-miR5012	0.108696	0.0764334	0.0925645	0.0228128	0.00448431	0	0.00224215	0.00317089	0.0168067	0.0277778	0.0222923	0.00775774
ath-miR5013	0	#DIV/0!	#DIV/0!	#DIV/0!	#DIV/0!	0	#DIV/0!	#DIV/0!	#DIV/0!	#DIV/0!	#DIV/0!	#DIV/0!
ath-miR5014a-3p	#DIV/0!	0	#DIV/0!	#DIV/0!	#DIV/0!	#DIV/0!	#DIV/0!	#DIV/0!	#DIV/0!	#DIV/0!	#DIV/0!	#DIV/0!
ath-miR5014a-5p	#DIV/0!	#DIV/0!	#DIV/0!	#DIV/0!	#DIV/0!	#DIV/0!	#DIV/0!	#DIV/0!	#DIV/0!	#DIV/0!	#DIV/0!	#DIV/0!
ath-miR5014b	#DIV/0!	#DIV/0!	#DIV/0!	#DIV/0!	#DIV/0!	#DIV/0!	#DIV/0!	#DIV/0!	#DIV/0!	#DIV/0!	#DIV/0!	#DIV/0!
ath-miR5019	#DIV/0!	#DIV/0!	#DIV/0!	#DIV/0!	#DIV/0!	0	#DIV/0!	#DIV/0!	#DIV/0!	#DIV/0!	#DIV/0!	#DIV/0!
ath-miR5020a	0	#DIV/0!	#DIV/0!	#DIV/0!	#DIV/0!	#DIV/0!	#DIV/0!	#DIV/0!	#DIV/0!	#DIV/0!	#DIV/0!	#DIV/0!
ath-miR5020b	#DIV/0!	#DIV/0!	#DIV/0!	#DIV/0!	#DIV/0!	#DIV/0!	#DIV/0!	#DIV/0!	#DIV/0!	#DIV/0!	#DIV/0!	#DIV/0!
ath-miR5020c	0	0	0	0	#DIV/0!	#DIV/0!	#DIV/0!	#DIV/0!	#DIV/0!	#DIV/0!	#DIV/0!	#DIV/0!
ath-miR5023	#DIV/0!	#DIV/0!	#DIV/0!	#DIV/0!	#DIV/0!	0	#DIV/0!	#DIV/0!	#DIV/0!	#DIV/0!	#DIV/0!	#DIV/0!
ath-miR5024-3p	0	0.00446427	0.00223214	0.00315672	0.025641	0.00740741	0.0165242	0.0128931	0	0	0	0
ath-miR5024-5p	#DIV/0!	#DIV/0!	#DIV/0!	#DIV/0!	#DIV/0!	#DIV/0!	#DIV/0!	#DIV/0!	#DIV/0!	#DIV/0!	#DIV/0!	#DIV/0!
ath-miR5026	0	0.00128205	0.000641026	0.000906547	0.008	0.00455841	0.0062792	0.00243358	0.00757575	0.0119048	0.00974026	0.00306108
ath-miR5027	#DIV/0!	0	#DIV/0!	#DIV/0!	#DIV/0!	#DIV/0!	#DIV/0!	#DIV/0!	0	#DIV/0!	#DIV/0!	#DIV/0!
ath-miR5028	0	0.285715	0.142857	0.202031	0.285714	0	0.142857	0.20203	0	0.2	0.0999998	0.141421
ath-miR5029	#DIV/0!	#DIV/0!	#DIV/0!	#DIV/0!	#DIV/0!	#DIV/0!	#DIV/0!	#DIV/0!	#DIV/0!	#DIV/0!	#DIV/0!	#DIV/0!
ath-miR5595a	0	0	0	0	0	0	0	0	#DIV/0!	0	#DIV/0!	#DIV/0!
ath-miR5629	0	0	0	0	0	0	0	0	0.4	0	0.2	0.282843
ath-miR5631	#DIV/0!	#DIV/0!	#DIV/0!	#DIV/0!	0	0	0	0	#DIV/0!	#DIV/0!	#DIV/0!	#DIV/0!
ath-miR5632-3p	0	0	0	0	#DIV/0!	0	#DIV/0!	#DIV/0!	#DIV/0!	#DIV/0!	#DIV/0!	#DIV/0!
ath-miR5632-5p	0	#DIV/0!	#DIV/0!	#DIV/0!	#DIV/0!	0.2	#DIV/0!	#DIV/0!	0	0	0	0
ath-miR5633	#DIV/0!	#DIV/0!	#DIV/0!	#DIV/0!	#DIV/0!	#DIV/0!	#DIV/0!	#DIV/0!	0	#DIV/0!	#DIV/0!	#DIV/0!
ath-miR5634	#DIV/0!	#DIV/0!	#DIV/0!	#DIV/0!	#DIV/0!	#DIV/0!	#DIV/0!	#DIV/0!	#DIV/0!	#DIV/0!	#DIV/0!	#DIV/0!
ath-miR5635a	#DIV/0!	#DIV/0!	#DIV/0!	#DIV/0!	#DIV/0!	#DIV/0!	#DIV/0!	#DIV/0!	#DIV/0!	#DIV/0!	#DIV/0!	#DIV/0!
ath-miR5635b	#DIV/0!	#DIV/0!	#DIV/0!	#DIV/0!	#DIV/0!	#DIV/0!	#DIV/0!	#DIV/0!	#DIV/0!	#DIV/0!	#DIV/0!	#DIV/0!
ath-miR5635c	#DIV/0!	#DIV/0!	#DIV/0!	#DIV/0!	#DIV/0!	#DIV/0!	#DIV/0!	#DIV/0!	#DIV/0!	#DIV/0!	#DIV/0!	#DIV/0!
ath-miR5635d	#DIV/0!	#DIV/0!	#DIV/0!	#DIV/0!	#DIV/0!	#DIV/0!	#DIV/0!	#DIV/0!	#DIV/0!	#DIV/0!	#DIV/0!	#DIV/0!
ath-miR5636	#DIV/0!	#DIV/0!	#DIV/0!	#DIV/0!	#DIV/0!	#DIV/0!	#DIV/0!	#DIV/0!	#DIV/0!	#DIV/0!	#DIV/0!	#DIV/0!
ath-miR5637	0	0	0	0	0	0	0	0	0	0	0	0
ath-miR5638a	0	#DIV/0!	#DIV/0!	#DIV/0!	#DIV/0!	#DIV/0!	#DIV/0!	#DIV/0!	0	#DIV/0!	#DIV/0!	#DIV/0!
ath-miR5638b	#DIV/0!	#DIV/0!	#DIV/0!	#DIV/0!	0	0	0	0	1	#DIV/0!	#DIV/0!	#DIV/0!
ath-miR5639-3p	#DIV/0!	#DIV/0!	#DIV/0!	#DIV/0!	#DIV/0!	#DIV/0!	#DIV/0!	#DIV/0!	#DIV/0!	#DIV/0!	#DIV/0!	#DIV/0!
ath-miR5639-5p	#DIV/0!	0	#DIV/0!	#DIV/0!	0	0	0	0	0	0	0	0
ath-miR5640	0	0	0	0	0	0	0	0	0	0	0	0
ath-miR5641	0	0	0	0	#DIV/0!	0	#DIV/0!	#DIV/0!	#DIV/0!	0	#DIV/0!	#DIV/0!
ath-miR5642a	0.0365854	0.00591715	0.0212513	0.0216857	0.0141376	0.0125238	0.0133307	0.00114108	0.0415513	0.0337079	0.0376296	0.00554619
ath-miR5642b	0.0365854	0.00591715	0.0212513	0.0216857	0.0141376	0.0125238	0.0133307	0.00114108	0.0415513	0.0337079	0.0376296	0.00554619
ath-miR5643a	#DIV/0!	0	#DIV/0!	#DIV/0!	0	0	0	0	#DIV/0!	#DIV/0!	#DIV/0!	#DIV/0!
ath-miR5643b	#DIV/0!	0	#DIV/0!	#DIV/0!	0	0	0	0	#DIV/0!	#DIV/0!	#DIV/0!	#DIV/0!
ath-miR5644	#DIV/0!	0	#DIV/0!	#DIV/0!	#DIV/0!	#DIV/0!	#DIV/0!	#DIV/0!	#DIV/0!	#DIV/0!	#DIV/0!	#DIV/0!
ath-miR5645a	#DIV/0!	#DIV/0!	#DIV/0!	#DIV/0!	#DIV/0!	#DIV/0!	#DIV/0!	#DIV/0!	#DIV/0!	#DIV/0!	#DIV/0!	#DIV/0!
ath-miR5645b	#DIV/0!	#DIV/0!	#DIV/0!	#DIV/0!	#DIV/0!	#DIV/0!	#DIV/0!	#DIV/0!	#DIV/0!	#DIV/0!	#DIV/0!	#DIV/0!
ath-miR5645c	#DIV/0!	#DIV/0!	#DIV/0!	#DIV/0!	#DIV/0!	0	#DIV/0!	#DIV/0!	#DIV/0!	#DIV/0!	#DIV/0!	#DIV/0!
ath-miR5645d	#DIV/0!	#DIV/0!	#DIV/0!	#DIV/0!	#DIV/0!	#DIV/0!	#DIV/0!	#DIV/0!	#DIV/0!	#DIV/0!	#DIV/0!	#DIV/0!
ath-miR5645e	#DIV/0!	#DIV/0!	#DIV/0!	#DIV/0!	#DIV/0!	#DIV/0!	#DIV/0!	#DIV/0!	#DIV/0!	#DIV/0!	#DIV/0!	#DIV/0!
ath-miR5645f	#DIV/0!	#DIV/0!	#DIV/0!	#DIV/0!	#DIV/0!	#DIV/0!	#DIV/0!	#DIV/0!	#DIV/0!	#DIV/0!	#DIV/0!	#DIV/0!
ath-miR5646	#DIV/0!	#DIV/0!	#DIV/0!	#DIV/0!	#DIV/0!	#DIV/0!	#DIV/0!	#DIV/0!	#DIV/0!	#DIV/0!	#DIV/0!	#DIV/0!
ath-miR5647	0	0	0	0	0	0	0	0	0	#DIV/0!	#DIV/0!	#DIV/0!
ath-miR5648-3p	#DIV/0!	#DIV/0!	#DIV/0!	#DIV/0!	#DIV/0!	#DIV/0!	#DIV/0!	#DIV/0!	#DIV/0!	#DIV/0!	#DIV/0!	#DIV/0!
ath-miR5648-5p	0	0	0	0	0	0	0	0	0	0	0	0
ath-miR5649a	#DIV/0!	#DIV/0!	#DIV/0!	#DIV/0!	#DIV/0!	#DIV/0!	#DIV/0!	#DIV/0!	#DIV/0!	#DIV/0!	#DIV/0!	#DIV/0!
ath-miR5649b	#DIV/0!	#DIV/0!	#DIV/0!	#DIV/0!	#DIV/0!	#DIV/0!	#DIV/0!	#DIV/0!	#DIV/0!	#DIV/0!	#DIV/0!	#DIV/0!
ath-miR5650	0	0	0	0	0	0	0	0	0	0	0	0
ath-miR5651	0.0535714	0.025974	0.0397727	0.0195143	0.076923	0.00826447	0.0425937	0.0485489	0	0.08	0.04	0.0565685
ath-miR5652	0	0	0	0	0	0	0	0	0	0	0	0
ath-miR5653	0	0	0	0	0	0	0	0	0	#DIV/0!	#DIV/0!	#DIV/0!
ath-miR5654-3p	0	0	0	0	0	0.00274537	0.00137268	0.00194127	0.00438597	0	0.00219298	0.00310135
ath-miR5654-5p	#DIV/0!	#DIV/0!	#DIV/0!	#DIV/0!	#DIV/0!	0	#DIV/0!	#DIV/0!	#DIV/0!	#DIV/0!	#DIV/0!	#DIV/0!
ath-miR5655	#DIV/0!	#DIV/0!	#DIV/0!	#DIV/0!	#DIV/0!	#DIV/0!	#DIV/0!	#DIV/0!	#DIV/0!	#DIV/0!	#DIV/0!	#DIV/0!
ath-miR5656	#DIV/0!	#DIV/0!	#DIV/0!	#DIV/0!	#DIV/0!	0	#DIV/0!	#DIV/0!	0	#DIV/0!	#DIV/0!	#DIV/0!
ath-miR5657	0	0	0	0	0.333334	0	0.166667	0.235702	0	0	0	0
ath-miR5658	#DIV/0!	#DIV/0!	#DIV/0!	#DIV/0!	0	#DIV/0!	#DIV/0!	#DIV/0!	#DIV/0!	0	#DIV/0!	#DIV/0!
ath-miR5659	#DIV/0!	#DIV/0!	#DIV/0!	#DIV/0!	#DIV/0!	#DIV/0!	#DIV/0!	#DIV/0!	#DIV/0!	#DIV/0!	#DIV/0!	#DIV/0!
ath-miR5660	#DIV/0!	#DIV/0!	#DIV/0!	#DIV/0!	#DIV/0!	0	#DIV/0!	#DIV/0!	#DIV/0!	#DIV/0!	#DIV/0!	#DIV/0!
ath-miR5661	#DIV/0!	#DIV/0!	#DIV/0!	#DIV/0!	#DIV/0!	#DIV/0!	#DIV/0!	#DIV/0!	#DIV/0!	#DIV/0!	#DIV/0!	#DIV/0!
ath-miR5662	#DIV/0!	#DIV/0!	#DIV/0!	#DIV/0!	#DIV/0!	#DIV/0!	#DIV/0!	#DIV/0!	#DIV/0!	#DIV/0!	#DIV/0!	#DIV/0!
ath-miR5663-3p	#DIV/0!	#DIV/0!	#DIV/0!	#DIV/0!	0	#DIV/0!	#DIV/0!	#DIV/0!	#DIV/0!	#DIV/0!	#DIV/0!	#DIV/0!
ath-miR5663-5p	#DIV/0!	#DIV/0!	#DIV/0!	#DIV/0!	#DIV/0!	#DIV/0!	#DIV/0!	#DIV/0!	0	#DIV/0!	#DIV/0!	#DIV/0!
ath-miR5664	#DIV/0!	#DIV/0!	#DIV/0!	#DIV/0!	#DIV/0!	#DIV/0!	#DIV/0!	#DIV/0!	#DIV/0!	#DIV/0!	#DIV/0!	#DIV/0!
ath-miR5665	0	#DIV/0!	#DIV/0!	#DIV/0!	0	#DIV/0!	#DIV/0!	#DIV/0!	#DIV/0!	#DIV/0!	#DIV/0!	#DIV/0!
ath-miR5666	#DIV/0!	#DIV/0!	#DIV/0!	#DIV/0!	#DIV/0!	#DIV/0!	#DIV/0!	#DIV/0!	#DIV/0!	#DIV/0!	#DIV/0!	#DIV/0!
ath-miR5995b	0	0	0	0	0	0	0	0	#DIV/0!	0	#DIV/0!	#DIV/0!
ath-miR5996	0.00373832	0.00252207	0.00313019	0.00086002	0.0117647	0.0100841	0.0109244	0.00118839	0.0199005	0.0254238	0.0226621	0.00390552
ath-miR5997	0	#DIV/0!	#DIV/0!	#DIV/0!	0	0	0	0	#DIV/0!	0	#DIV/0!	#DIV/0!
ath-miR5998a	#DIV/0!	#DIV/0!	#DIV/0!	#DIV/0!	#DIV/0!	#DIV/0!	#DIV/0!	#DIV/0!	#DIV/0!	#DIV/0!	#DIV/0!	#DIV/0!
ath-miR5998b	#DIV/0!	#DIV/0!	#DIV/0!	#DIV/0!	#DIV/0!	#DIV/0!	#DIV/0!	#DIV/0!	#DIV/0!	#DIV/0!	#DIV/0!	#DIV/0!
ath-miR5999	0	#DIV/0!	#DIV/0!	#DIV/0!	#DIV/0!	1	#DIV/0!	#DIV/0!	#DIV/0!	#DIV/0!	#DIV/0!	#DIV/0!
ath-miR771	0	0	0	0	0	0	0	0	0	0.666667	0.333333	0.471405
ath-miR773a	0.0666666	0.117949	0.0923077	0.036262	0.0686813	0.0720269	0.0703541	0.00236567	0.096276	0.0943397	0.0953078	0.00136918
ath-miR773b-3p	0	#DIV/0!	#DIV/0!	#DIV/0!	0	0	0	0	0.5	#DIV/0!	#DIV/0!	#DIV/0!
ath-miR774a	#DIV/0!	#DIV/0!	#DIV/0!	#DIV/0!	#DIV/0!	#DIV/0!	#DIV/0!	#DIV/0!	#DIV/0!	#DIV/0!	#DIV/0!	#DIV/0!
ath-miR775	0.0228758	0.0186335	0.0207547	0.00299974	0.00828938	0.0126253	0.0104573	0.00306597	0.0357141	0.049116	0.0424151	0.00947661
ath-miR776	#DIV/0!	#DIV/0!	#DIV/0!	#DIV/0!	#DIV/0!	#DIV/0!	#DIV/0!	#DIV/0!	#DIV/0!	#DIV/0!	#DIV/0!	#DIV/0!
ath-miR777	#DIV/0!	#DIV/0!	#DIV/0!	#DIV/0!	0	0	0	0	0.027027	0	0.0135135	0.019111
ath-miR778	#DIV/0!	#DIV/0!	#DIV/0!	#DIV/0!	#DIV/0!	#DIV/0!	#DIV/0!	#DIV/0!	#DIV/0!	#DIV/0!	#DIV/0!	#DIV/0!
ath-miR779.1	0	0	0	0	0	0.0689655	0.0344827	0.048766	0.0909091	0.076923	0.0839161	0.00988964
ath-miR779.2	0.0909091	0	0.0454546	0.0642825	0.0208333	0.0116279	0.0162306	0.00650922	0.0249999	0.025	0.025	4.95736e-08
ath-miR780.1	0	0	0	0	0	0	0	0	0	0	0	0
ath-miR780.2	0	0	0	0	0	0	0	0	0.333333	0	0.166667	0.235702
ath-miR781a	0.0107527	0	0.00537635	0.00760331	0.00588235	0.0040404	0.00496138	0.00130246	0.0135135	0	0.00675673	0.00955546
ath-miR781b	0.0107527	0	0.00537635	0.00760331	0.00588235	0.0040404	0.00496138	0.00130246	0.0135135	0	0.00675673	0.00955546
ath-miR782	#DIV/0!	#DIV/0!	#DIV/0!	#DIV/0!	#DIV/0!	#DIV/0!	#DIV/0!	#DIV/0!	#DIV/0!	#DIV/0!	#DIV/0!	#DIV/0!
ath-miR8121	#DIV/0!	#DIV/0!	#DIV/0!	#DIV/0!	#DIV/0!	#DIV/0!	#DIV/0!	#DIV/0!	#DIV/0!	#DIV/0!	#DIV/0!	#DIV/0!
ath-miR8165	#DIV/0!	#DIV/0!	#DIV/0!	#DIV/0!	#DIV/0!	#DIV/0!	#DIV/0!	#DIV/0!	#DIV/0!	#DIV/0!	#DIV/0!	#DIV/0!
ath-miR8166	#DIV/0!	#DIV/0!	#DIV/0!	#DIV/0!	0	#DIV/0!	#DIV/0!	#DIV/0!	#DIV/0!	#DIV/0!	#DIV/0!	#DIV/0!
ath-miR8167a	#DIV/0!	#DIV/0!	#DIV/0!	#DIV/0!	#DIV/0!	#DIV/0!	#DIV/0!	#DIV/0!	#DIV/0!	#DIV/0!	#DIV/0!	#DIV/0!
ath-miR8167b	#DIV/0!	#DIV/0!	#DIV/0!	#DIV/0!	#DIV/0!	#DIV/0!	#DIV/0!	#DIV/0!	#DIV/0!	#DIV/0!	#DIV/0!	#DIV/0!
ath-miR8167c	#DIV/0!	#DIV/0!	#DIV/0!	#DIV/0!	#DIV/0!	#DIV/0!	#DIV/0!	#DIV/0!	#DIV/0!	#DIV/0!	#DIV/0!	#DIV/0!
ath-miR8167d	#DIV/0!	#DIV/0!	#DIV/0!	#DIV/0!	#DIV/0!	#DIV/0!	#DIV/0!	#DIV/0!	#DIV/0!	#DIV/0!	#DIV/0!	#DIV/0!
ath-miR8167e	#DIV/0!	#DIV/0!	#DIV/0!	#DIV/0!	#DIV/0!	#DIV/0!	#DIV/0!	#DIV/0!	#DIV/0!	#DIV/0!	#DIV/0!	#DIV/0!
ath-miR8167f	#DIV/0!	#DIV/0!	#DIV/0!	#DIV/0!	#DIV/0!	#DIV/0!	#DIV/0!	#DIV/0!	#DIV/0!	#DIV/0!	#DIV/0!	#DIV/0!
ath-miR8168	#DIV/0!	#DIV/0!	#DIV/0!	#DIV/0!	#DIV/0!	0	#DIV/0!	#DIV/0!	#DIV/0!	#DIV/0!	#DIV/0!	#DIV/0!
ath-miR8169	#DIV/0!	#DIV/0!	#DIV/0!	#DIV/0!	#DIV/0!	#DIV/0!	#DIV/0!	#DIV/0!	0	#DIV/0!	#DIV/0!	#DIV/0!
ath-miR8170-3p	0	0	0	0	#DIV/0!	0.5	#DIV/0!	#DIV/0!	0	#DIV/0!	#DIV/0!	#DIV/0!
ath-miR8170-5p	#DIV/0!	#DIV/0!	#DIV/0!	#DIV/0!	#DIV/0!	#DIV/0!	#DIV/0!	#DIV/0!	#DIV/0!	#DIV/0!	#DIV/0!	#DIV/0!
ath-miR8171	#DIV/0!	#DIV/0!	#DIV/0!	#DIV/0!	0	#DIV/0!	#DIV/0!	#DIV/0!	#DIV/0!	#DIV/0!	#DIV/0!	#DIV/0!
ath-miR8172	#DIV/0!	#DIV/0!	#DIV/0!	#DIV/0!	#DIV/0!	#DIV/0!	#DIV/0!	#DIV/0!	#DIV/0!	#DIV/0!	#DIV/0!	#DIV/0!
ath-miR8173	#DIV/0!	#DIV/0!	#DIV/0!	#DIV/0!	#DIV/0!	#DIV/0!	#DIV/0!	#DIV/0!	#DIV/0!	#DIV/0!	#DIV/0!	#DIV/0!
ath-miR8174	#DIV/0!	#DIV/0!	#DIV/0!	#DIV/0!	#DIV/0!	#DIV/0!	#DIV/0!	#DIV/0!	#DIV/0!	#DIV/0!	#DIV/0!	#DIV/0!
ath-miR8175	#DIV/0!	#DIV/0!	#DIV/0!	#DIV/0!	#DIV/0!	#DIV/0!	#DIV/0!	#DIV/0!	#DIV/0!	#DIV/0!	#DIV/0!	#DIV/0!
ath-miR8177	#DIV/0!	#DIV/0!	#DIV/0!	#DIV/0!	#DIV/0!	#DIV/0!	#DIV/0!	#DIV/0!	#DIV/0!	#DIV/0!	#DIV/0!	#DIV/0!
ath-miR8178	#DIV/0!	#DIV/0!	#DIV/0!	#DIV/0!	#DIV/0!	#DIV/0!	#DIV/0!	#DIV/0!	#DIV/0!	#DIV/0!	#DIV/0!	#DIV/0!
ath-miR8179	#DIV/0!	0	#DIV/0!	#DIV/0!	0	0	0	0	0	0	0	0
ath-miR8180	0	#DIV/0!	#DIV/0!	#DIV/0!	0	0	0	0	#DIV/0!	#DIV/0!	#DIV/0!	#DIV/0!
ath-miR8181	#DIV/0!	#DIV/0!	#DIV/0!	#DIV/0!	#DIV/0!	#DIV/0!	#DIV/0!	#DIV/0!	#DIV/0!	#DIV/0!	#DIV/0!	#DIV/0!
ath-miR8182	0	0	0	0	0	0	0	0	0	0	0	0
ath-miR8183	0	0	0	0	0	0	0	0	0.0909092	0	0.0454546	0.0642825
ath-miR8184	0	0	0	0	0	0	0	0	#DIV/0!	0	#DIV/0!	#DIV/0!
ath-miR822-3p	0	0.12	0.0599999	0.0848527	0	0.123077	0.0615386	0.0870287	0.0943394	0.051282	0.0728107	0.0304462
ath-miR822-5p	0.0471699	0.00746266	0.0273163	0.0280773	0.0134771	0.0300471	0.0217621	0.0117168	0.0393701	0.043299	0.0413345	0.0027782
ath-miR823	0	0	0	0	0	0.00700934	0.00350467	0.00495635	0.0416667	0	0.0208334	0.0294628
ath-miR824-3p	0	0	0	0	0	0	0	0	0	0.333334	0.166667	0.235702
ath-miR824-5p	0.0123457	0.0373135	0.0248296	0.0176549	0.0526316	0.0232558	0.0379437	0.0207718	0.0684932	0.0806451	0.0745692	0.00859268
ath-miR825	0.188525	0.226277	0.207401	0.0266952	0.0238095	0.0265252	0.0251673	0.00192025	0.134078	0.11811	0.126094	0.0112911
ath-miR826a	#DIV/0!	0	#DIV/0!	#DIV/0!	#DIV/0!	#DIV/0!	#DIV/0!	#DIV/0!	0	0	0	0
ath-miR826b	#DIV/0!	#DIV/0!	#DIV/0!	#DIV/0!	#DIV/0!	#DIV/0!	#DIV/0!	#DIV/0!	#DIV/0!	#DIV/0!	#DIV/0!	#DIV/0!
ath-miR827	0.076923	0	0.0384615	0.0543928	0.25	0.0454546	0.147727	0.144635	0.15	0.153846	0.151923	0.00271989
ath-miR828	0	0	0	0	0	0.0909091	0.0454546	0.0642825	0	0.249999	0.125	0.176776
ath-miR829-3p.1	#DIV/0!	#DIV/0!	#DIV/0!	#DIV/0!	#DIV/0!	#DIV/0!	#DIV/0!	#DIV/0!	0	#DIV/0!	#DIV/0!	#DIV/0!
ath-miR829-3p.2	0	0	0	0	0	0	0	0	0.125	0.333333	0.229167	0.147314
ath-miR829-5p	0	0	0	0	0	0	0	0	0	0	0	0
ath-miR830-3p	#DIV/0!	0	#DIV/0!	#DIV/0!	#DIV/0!	0	#DIV/0!	#DIV/0!	#DIV/0!	0	#DIV/0!	#DIV/0!
ath-miR830-5p	0	0	0	0	0	0	0	0	#DIV/0!	0	#DIV/0!	#DIV/0!
ath-miR831-3p	0.00162602	0.00126903	0.00144752	0.000252425	0	0	0	0	0	0	0	0
ath-miR831-5p	#DIV/0!	#DIV/0!	#DIV/0!	#DIV/0!	#DIV/0!	#DIV/0!	#DIV/0!	#DIV/0!	#DIV/0!	#DIV/0!	#DIV/0!	#DIV/0!
ath-miR832-3p	#DIV/0!	#DIV/0!	#DIV/0!	#DIV/0!	#DIV/0!	#DIV/0!	#DIV/0!	#DIV/0!	#DIV/0!	#DIV/0!	#DIV/0!	#DIV/0!
ath-miR832-5p	#DIV/0!	#DIV/0!	#DIV/0!	#DIV/0!	#DIV/0!	#DIV/0!	#DIV/0!	#DIV/0!	#DIV/0!	#DIV/0!	#DIV/0!	#DIV/0!
ath-miR833a-3p	#DIV/0!	0	#DIV/0!	#DIV/0!	0	0	0	0	#DIV/0!	#DIV/0!	#DIV/0!	#DIV/0!
ath-miR833a-5p	0	0	0	0	0	0.0120482	0.0060241	0.00851936	0	0	0	0
ath-miR833b	0.333334	0.562499	0.447916	0.162045	0	0.444445	0.222222	0.31427	0.363637	0	0.181818	0.25713
ath-miR834	#DIV/0!	0	#DIV/0!	#DIV/0!	0	0	0	0	#DIV/0!	#DIV/0!	#DIV/0!	#DIV/0!
ath-miR835-3p	0	1	0.5	0.707107	#DIV/0!	0	#DIV/0!	#DIV/0!	#DIV/0!	#DIV/0!	#DIV/0!	#DIV/0!
ath-miR835-5p	0	#DIV/0!	#DIV/0!	#DIV/0!	#DIV/0!	0.25	#DIV/0!	#DIV/0!	0.5	0	0.25	0.353553
ath-miR836	#DIV/0!	#DIV/0!	#DIV/0!	#DIV/0!	0	0	0	0	#DIV/0!	#DIV/0!	#DIV/0!	#DIV/0!
ath-miR837-3p	#DIV/0!	0	#DIV/0!	#DIV/0!	0	0	0	0	#DIV/0!	#DIV/0!	#DIV/0!	#DIV/0!
ath-miR837-5p	0	0	0	0	0	0	0	0	#DIV/0!	0	#DIV/0!	#DIV/0!
ath-miR838	0	0	0	0	0	0.00384616	0.00192308	0.00271964	0	0.0298508	0.0149254	0.0211077
ath-miR839-5p	0.0909091	0	0.0454546	0.0642825	0.0204082	0.0306123	0.0255102	0.00721541	0.0740741	0.0465117	0.0602929	0.0194895
ath-miR840-3p	0.0421688	0.0813954	0.0617821	0.0277374	0.0285714	0.0531178	0.0408446	0.0173569	0.0746269	0.040404	0.0575155	0.0241993
ath-miR840-5p	0	0	0	0	0	0	0	0	0	0	0	0
ath-miR841a-3p	0.02	0	0.00999999	0.0141421	0.0294118	0.00800001	0.0187059	0.0151404	0	0	0	0
ath-miR841a-5p	0.166667	0.210526	0.188597	0.0310133	0	0.0105263	0.00526316	0.00744323	0.097561	0.0322581	0.0649095	0.0461762
ath-miR841b-3p	0	0	0	0	0	0.0140845	0.00704227	0.00995927	0	0	0	0
ath-miR841b-5p	0.142857	0.142857	0.142857	4.74899e-08	0	0	0	0	0	0	0	0
ath-miR842	0	0	0	0	0	0.051282	0.025641	0.0362618	0.111111	0	0.0555556	0.0785674
ath-miR843	0	0.000299669	0.000149835	0.000211898	0.00867052	0.00765111	0.00816081	0.000720835	0.022388	0.0487805	0.0355842	0.0186623
ath-miR844-3p	0.25	0.5	0.375	0.176777	0.125	0.0555556	0.0902778	0.0491046	0.0454546	0	0.0227273	0.0321412
ath-miR844-5p	#DIV/0!	#DIV/0!	#DIV/0!	#DIV/0!	#DIV/0!	0	#DIV/0!	#DIV/0!	0	#DIV/0!	#DIV/0!	#DIV/0!
ath-miR845a	0.000506072	0.000402901	0.000454487	7.29532e-05	0	0.0014111	0.00070555	0.000997799	0.00325732	0.00487805	0.00406769	0.00114603
ath-miR845b	0	0	0	0	0	0	0	0	0	0	0	0
ath-miR846-3p	0.201586	0.188197	0.194892	0.00946752	0.0255755	0.0413038	0.0334396	0.0111216	0.0321769	0.0331141	0.0326455	0.000662665
ath-miR846-5p	0.142857	0.110553	0.126705	0.0228428	0.045045	0.0358306	0.0404378	0.00651557	0.133334	0.118421	0.125877	0.0105447
ath-miR847	0.0175439	0	0.00877193	0.0124054	0	0.0121951	0.00609756	0.00862325	0.106383	0	0.0531915	0.0752241
ath-miR848	0	0	0	0	0.0119048	0.0208334	0.0163691	0.00631347	0	0.0344828	0.0172414	0.024383
ath-miR849	#DIV/0!	#DIV/0!	#DIV/0!	#DIV/0!	#DIV/0!	#DIV/0!	#DIV/0!	#DIV/0!	#DIV/0!	#DIV/0!	#DIV/0!	#DIV/0!
ath-miR850	0.17321	0.197843	0.185527	0.0174185	0.0625	0.0503282	0.0564141	0.00860678	0.245098	0.369864	0.307481	0.0882226
ath-miR851-3p	0	0	0	0	#DIV/0!	0	#DIV/0!	#DIV/0!	#DIV/0!	#DIV/0!	#DIV/0!	#DIV/0!
ath-miR851-5p	0	0	0	0	0	0	0	0	0	0	0	0
ath-miR852	#DIV/0!	#DIV/0!	#DIV/0!	#DIV/0!	0	0	0	0	0	0	0	0
ath-miR853	0	0.2	0.1	0.141421	0.5	0.142857	0.321428	0.252538	0.0909091	0.333334	0.212122	0.17142
ath-miR855	#DIV/0!	#DIV/0!	#DIV/0!	#DIV/0!	#DIV/0!	#DIV/0!	#DIV/0!	#DIV/0!	#DIV/0!	#DIV/0!	#DIV/0!	#DIV/0!
ath-miR856	#DIV/0!	#DIV/0!	#DIV/0!	#DIV/0!	#DIV/0!	0	#DIV/0!	#DIV/0!	#DIV/0!	#DIV/0!	#DIV/0!	#DIV/0!
ath-miR857	0.0588236	0	0.0294118	0.0415945	0.0365854	0.0409837	0.0387845	0.00311006	0.0434783	0.0499999	0.0467391	0.00461148
ath-miR858a	0.269035	0.198218	0.233626	0.0500755	0.0738255	0.0670392	0.0704324	0.00479865	0.124402	0.112513	0.118458	0.00840671
ath-miR858b	0.0933335	0.0692307	0.0812821	0.0170433	0.0137615	0.0352423	0.0245019	0.0151892	0.0198864	0.0332225	0.0265545	0.00943007
ath-miR859	0	0	0	0	0	0.03125	0.015625	0.0220971	0	0	0	0
ath-miR860	0.4	0	0.2	0.282843	0	0.0909091	0.0454546	0.0642825	0	0	0	0
ath-miR861-3p	#DIV/0!	#DIV/0!	#DIV/0!	#DIV/0!	#DIV/0!	#DIV/0!	#DIV/0!	#DIV/0!	#DIV/0!	#DIV/0!	#DIV/0!	#DIV/0!
ath-miR861-5p	#DIV/0!	#DIV/0!	#DIV/0!	#DIV/0!	#DIV/0!	#DIV/0!	#DIV/0!	#DIV/0!	#DIV/0!	#DIV/0!	#DIV/0!	#DIV/0!
ath-miR862-3p	#DIV/0!	#DIV/0!	#DIV/0!	#DIV/0!	#DIV/0!	#DIV/0!	#DIV/0!	#DIV/0!	#DIV/0!	#DIV/0!	#DIV/0!	#DIV/0!
ath-miR862-5p	0.0499999	0	0.025	0.0353553	0	0	0	0	0	0	0	0
ath-miR863-3p	0.142857	0	0.0714283	0.101015	0	0	0	0	0	0	0	0
ath-miR863-5p	0.314815	0.381295	0.348055	0.0470088	0.111111	0.079646	0.0953786	0.0222492	0.0476191	0.0689655	0.0582923	0.0150942
ath-miR864-3p	#DIV/0!	#DIV/0!	#DIV/0!	#DIV/0!	#DIV/0!	#DIV/0!	#DIV/0!	#DIV/0!	#DIV/0!	0	#DIV/0!	#DIV/0!
ath-miR864-5p	1	0.692307	0.846154	0.217572	0.142857	0.2	0.171429	0.040406	0.333333	0.4	0.366667	0.0471405
ath-miR865-3p	#DIV/0!	#DIV/0!	#DIV/0!	#DIV/0!	#DIV/0!	#DIV/0!	#DIV/0!	#DIV/0!	#DIV/0!	0	#DIV/0!	#DIV/0!
ath-miR865-5p	0	#DIV/0!	#DIV/0!	#DIV/0!	0	0	0	0	#DIV/0!	0	#DIV/0!	#DIV/0!
ath-miR866-3p	0	0	0	0	#DIV/0!	0	#DIV/0!	#DIV/0!	#DIV/0!	#DIV/0!	#DIV/0!	#DIV/0!
ath-miR866-5p	0	0	0	0	0	0	0	0	0	0	0	0
ath-miR868-3p	#DIV/0!	#DIV/0!	#DIV/0!	#DIV/0!	#DIV/0!	#DIV/0!	#DIV/0!	#DIV/0!	#DIV/0!	#DIV/0!	#DIV/0!	#DIV/0!
ath-miR868-5p	1	1	1	0	#DIV/0!	0	#DIV/0!	#DIV/0!	0.333333	0	0.166667	0.235702
ath-miR869.1	#DIV/0!	#DIV/0!	#DIV/0!	#DIV/0!	0	#DIV/0!	#DIV/0!	#DIV/0!	1	#DIV/0!	#DIV/0!	#DIV/0!
ath-miR869.2	0.0035559	0.00617093	0.00486342	0.00184911	0.00787401	0.0108359	0.00935496	0.00209438	0.0344828	0.0243903	0.0294365	0.00713647
ath-miR870-3p	0	0	0	0	0	0	0	0	#DIV/0!	0	#DIV/0!	#DIV/0!
ath-miR870-5p	0	#DIV/0!	#DIV/0!	#DIV/0!	#DIV/0!	#DIV/0!	#DIV/0!	#DIV/0!	#DIV/0!	#DIV/0!	#DIV/0!	#DIV/0!
miR156ij	0	0	0	0	0	0	0	0	0	0	0	0
miR159a-c	0.033296	0.0343557	0.0338259	0.000749339	0.016459	0.0166606	0.0165598	0.000142574	0.0249677	0.0238562	0.024412	0.00078595
miR167abd	0.00248698	0.00173997	0.00211347	0.000528217	0.0146725	0.0171822	0.0159274	0.00177467	0.0377647	0.0351175	0.0364411	0.00187188
miR169a-c	0	0	0	0	0.0625	0.0555556	0.0590278	0.00491046	0.0666668	0.1	0.0833334	0.0235701
miR172a-d	0.368422	0.261904	0.315163	0.0753194	0.109375	0.096	0.102687	0.00945748	0.135922	0.122222	0.129072	0.00968749
miR319a-c	0.0779591	0.0777587	0.0778589	0.000141697	0.102648	0.0983647	0.100506	0.00302858	0.15183	0.15041	0.15112	0.00100443
miR395a-f	0.00575738	0.00639401	0.00607569	0.000450169	0.0093671	0.0100441	0.00970559	0.000478696	0.0208681	0.0137328	0.0173005	0.00504542
miR396ab	0.00463445	0.00445719	0.00454582	0.000125345	0.00880033	0.00803784	0.00841908	0.000539158	0.0183566	0.0184073	0.018382	3.57866e-05
miR398a-c	0.00022593	0.000169871	0.000197901	3.96392e-05	0.000771772	0.00047495	0.000623361	0.000209885	0.00155453	0.00188315	0.00171884	0.00023237
miR399a-f	0	0.00455581	0.00227791	0.00322145	0.0148148	0.00785341	0.0113341	0.00492245	0.0283019	0.015873	0.0220874	0.00878854

## Sheet: AGO1 IP-Ratio-TR+TA
S4 Data. Composition of miRNA forms in AGO1 and AGO10 IP treated with SDN1 and SDN1 catalytic mutant (SDN1-D283A).
	AGO1 IP (Mock)				AGO1 IP (SDN1)				AGO1 IP (SDN1-D283A)
miRNAs	br1	br2	Mean	Stdev	br1	br2	Mean	Stdev	br1	br2	Mean	Stdev
ath-miR156a-3p	0.5	0	0.25	0.353553	0	0	0	0	0	#DIV/0!	#DIV/0!	#DIV/0!
ath-miR156a-5p	0.120248	0.129241	0.124745	0.00635947	0.132991	0.113273	0.123132	0.0139425	0.143732	0.142871	0.143301	0.000608566
ath-miR156b-3p	0.0992577	0.112316	0.105787	0.00923373	0.140019	0.109432	0.124726	0.021628	0.161331	0.169348	0.165339	0.00566855
ath-miR156b-5p	0.120248	0.129241	0.124745	0.00635947	0.132991	0.113273	0.123132	0.0139425	0.143732	0.142871	0.143301	0.000608566
ath-miR156c-3p	0	0	0	0	#DIV/0!	0.25	#DIV/0!	#DIV/0!	0	0	0	0
ath-miR156c-5p	0.120248	0.129241	0.124745	0.00635947	0.132991	0.113273	0.123132	0.0139425	0.143732	0.142871	0.143301	0.000608566
ath-miR156d-3p	#DIV/0!	#DIV/0!	#DIV/0!	#DIV/0!	#DIV/0!	#DIV/0!	#DIV/0!	#DIV/0!	#DIV/0!	#DIV/0!	#DIV/0!	#DIV/0!
ath-miR156d-5p	0.120248	0.129241	0.124745	0.00635947	0.132991	0.113273	0.123132	0.0139425	0.143732	0.142871	0.143301	0.000608566
ath-miR156e	0.120248	0.129241	0.124745	0.00635947	0.132991	0.113273	0.123132	0.0139425	0.143732	0.142871	0.143301	0.000608566
ath-miR156f-3p	#DIV/0!	#DIV/0!	#DIV/0!	#DIV/0!	#DIV/0!	#DIV/0!	#DIV/0!	#DIV/0!	#DIV/0!	#DIV/0!	#DIV/0!	#DIV/0!
ath-miR156f-5p	0.120248	0.129241	0.124745	0.00635947	0.132991	0.113273	0.123132	0.0139425	0.143732	0.142871	0.143301	0.000608566
ath-miR156g	0.159509	0.134199	0.146854	0.0178969	0.191176	0.0895522	0.140364	0.0718591	0.210526	0.0857145	0.14812	0.0882554
ath-miR156h	0.166666	0.285714	0.22619	0.0841796	0.5	0.166667	0.333333	0.235702	0.2	0	0.1	0.141421
ath-miR156i	0.333334	0.47619	0.404762	0.101015	0.25	0.227273	0.238637	0.01607	0.285714	0.333333	0.309524	0.0336718
ath-miR156j	0.208333	0.301887	0.25511	0.0661527	0.466667	0.207793	0.33723	0.183052	0.285714	0.272728	0.279221	0.00918291
ath-miR157a-3p	0.214286	0.157894	0.18609	0.0398748	0	0.0416667	0.0208334	0.0294628	0.25	0	0.125	0.176777
ath-miR157a-5p	0.355548	0.35819	0.356869	0.00186851	0.321161	0.269472	0.295316	0.0365502	0.322213	0.319045	0.320629	0.00224067
ath-miR157b-3p	0.214286	0.157894	0.18609	0.0398748	0	0.0416667	0.0208334	0.0294628	0.25	0	0.125	0.176777
ath-miR157b-5p	0.355548	0.35819	0.356869	0.00186851	0.321161	0.269472	0.295316	0.0365502	0.322213	0.319045	0.320629	0.00224067
ath-miR157c-3p	0.213793	0.322581	0.268187	0.0769246	0.166667	0.236487	0.201577	0.0493702	0.354838	0.263158	0.308998	0.0648279
ath-miR157c-5p	0.355548	0.35819	0.356869	0.00186851	0.321161	0.269472	0.295316	0.0365502	0.322213	0.319045	0.320629	0.00224067
ath-miR157d	0.523809	0.531764	0.527787	0.00562496	0.525346	0.41637	0.470858	0.0770573	0.527273	0.451807	0.48954	0.0533625
ath-miR158a-3p	0.381841	0.342401	0.362121	0.0278881	0.22451	0.22211	0.22331	0.00169707	0.389008	0.391924	0.390466	0.00206186
ath-miR158a-5p	0.108586	0.0903954	0.0994905	0.0128623	0.0350877	0.0758929	0.0554903	0.0288537	0.0666667	0.173913	0.12029	0.0758345
ath-miR158b	0.405517	0.333772	0.369645	0.0507312	0.1875	0.185557	0.186528	0.00137366	0.32271	0.328836	0.325773	0.00433215
ath-miR159a	0.0862189	0.0714646	0.0788418	0.0104329	0.074728	0.0600311	0.0673795	0.0103923	0.0805955	0.0880112	0.0843034	0.0052437
ath-miR159b-3p	0.127239	0.110995	0.119117	0.0114861	0.0982391	0.0883393	0.0932892	0.00700019	0.125701	0.136151	0.130926	0.00738922
ath-miR159b-5p	0.0625	0	0.03125	0.0441941	0.166667	0.0833333	0.125	0.0589256	0	0.142857	0.0714286	0.101015
ath-miR159c	0.322072	0.294396	0.308234	0.0195701	0.250231	0.202403	0.226317	0.0338195	0.308604	0.34305	0.325827	0.0243568
ath-miR160a-3p	#DIV/0!	#DIV/0!	#DIV/0!	#DIV/0!	0	#DIV/0!	#DIV/0!	#DIV/0!	#DIV/0!	#DIV/0!	#DIV/0!	#DIV/0!
ath-miR160a-5p	0.441589	0.348011	0.3948	0.0661691	0.143474	0.122352	0.132913	0.014935	0.148907	0.158522	0.153714	0.00679918
ath-miR160b	0.441589	0.348011	0.3948	0.0661691	0.143474	0.122352	0.132913	0.014935	0.148907	0.158522	0.153714	0.00679918
ath-miR160c-3p	#DIV/0!	0	#DIV/0!	#DIV/0!	0	0	0	0	#DIV/0!	0	#DIV/0!	#DIV/0!
ath-miR160c-5p	0.441589	0.348011	0.3948	0.0661691	0.143474	0.122352	0.132913	0.014935	0.148907	0.158522	0.153714	0.00679918
ath-miR161.1	0.126112	0.0983768	0.112244	0.0196115	0.13448	0.103891	0.119186	0.0216293	0.166782	0.190429	0.178605	0.0167212
ath-miR161.2	0.434783	0.451253	0.443018	0.0116465	0.269231	0.209164	0.239197	0.042474	0.430769	0.407821	0.419295	0.0162266
ath-miR162a-3p	0.12543	0.164696	0.145063	0.0277653	0.157769	0.135075	0.146422	0.0160471	0.181256	0.189415	0.185336	0.00576916
ath-miR162a-5p	0.050633	0.0607902	0.0557116	0.0071822	0.0624999	0.0535055	0.0580027	0.00636003	0.0854701	0.0566039	0.071037	0.0204115
ath-miR162b-3p	0.12543	0.164696	0.145063	0.0277653	0.157769	0.135075	0.146422	0.0160471	0.181256	0.189415	0.185336	0.00576916
ath-miR162b-5p	0.050633	0.0607902	0.0557116	0.0071822	0.0624999	0.0535055	0.0580027	0.00636003	0.0854701	0.0566039	0.071037	0.0204115
ath-miR163	0.353846	0.331663	0.342755	0.0156856	0.16112	0.165849	0.163484	0.00334444	0.176322	0.168736	0.172529	0.00536401
ath-miR164a	0.114735	0.109252	0.111994	0.00387703	0.0983607	0.0843591	0.0913599	0.00990063	0.0983408	0.111295	0.104818	0.00916001
ath-miR164b-3p	0	0	0	0	0.0833333	0.0731707	0.078252	0.00718606	0.0909091	0.064516	0.0777125	0.0186627
ath-miR164b-5p	0.114735	0.109252	0.111994	0.00387703	0.0983607	0.0843591	0.0913599	0.00990063	0.0983408	0.111295	0.104818	0.00916001
ath-miR164c-3p	0	0.090909	0.0454545	0.0642824	0	0	0	0	0.2	0	0.1	0.141421
ath-miR164c-5p	0.17171	0.180685	0.176198	0.00634637	0.210572	0.165362	0.187967	0.031968	0.217949	0.261346	0.239648	0.0306866
ath-miR165a-3p	0.23088	0.243603	0.237242	0.00899661	0.231152	0.197326	0.214239	0.0239189	0.268512	0.271566	0.270039	0.00215923
ath-miR165a-5p	0.166666	#DIV/0!	#DIV/0!	#DIV/0!	0	0	0	0	#DIV/0!	#DIV/0!	#DIV/0!	#DIV/0!
ath-miR165b	0.23088	0.243603	0.237242	0.00899661	0.231152	0.197326	0.214239	0.0239189	0.268512	0.271566	0.270039	0.00215923
ath-miR166a-3p	0.187238	0.191804	0.189521	0.003229	0.155858	0.133076	0.144467	0.0161092	0.191936	0.191624	0.19178	0.000220464
ath-miR166a-5p	#DIV/0!	0.5	#DIV/0!	#DIV/0!	0	0	0	0	#DIV/0!	0	#DIV/0!	#DIV/0!
ath-miR166b-3p	0.187238	0.191804	0.189521	0.003229	0.155858	0.133076	0.144467	0.0161092	0.191936	0.191624	0.19178	0.000220464
ath-miR166b-5p	#DIV/0!	0.5	#DIV/0!	#DIV/0!	0	0	0	0	#DIV/0!	0	#DIV/0!	#DIV/0!
ath-miR166c	0.187238	0.191804	0.189521	0.003229	0.155858	0.133076	0.144467	0.0161092	0.191936	0.191624	0.19178	0.000220464
ath-miR166d	0.187238	0.191804	0.189521	0.003229	0.155858	0.133076	0.144467	0.0161092	0.191936	0.191624	0.19178	0.000220464
ath-miR166e-3p	0.187238	0.191804	0.189521	0.003229	0.155858	0.133076	0.144467	0.0161092	0.191936	0.191624	0.19178	0.000220464
ath-miR166e-5p	#DIV/0!	#DIV/0!	#DIV/0!	#DIV/0!	#DIV/0!	#DIV/0!	#DIV/0!	#DIV/0!	#DIV/0!	#DIV/0!	#DIV/0!	#DIV/0!
ath-miR166f	0.187238	0.191804	0.189521	0.003229	0.155858	0.133076	0.144467	0.0161092	0.191936	0.191624	0.19178	0.000220464
ath-miR166g	0.187238	0.191804	0.189521	0.003229	0.155858	0.133076	0.144467	0.0161092	0.191936	0.191624	0.19178	0.000220464
ath-miR167a-3p	#DIV/0!	#DIV/0!	#DIV/0!	#DIV/0!	0	0	0	0	0	0	0	0
ath-miR167a-5p	0.0846009	0.0761311	0.080366	0.00598904	0.0725985	0.0705159	0.0715572	0.00147265	0.104765	0.108739	0.106752	0.00280944
ath-miR167b	0.0846009	0.0761311	0.080366	0.00598904	0.0725985	0.0705159	0.0715572	0.00147265	0.104765	0.108739	0.106752	0.00280944
ath-miR167c-3p	0.109661	0.12515	0.117406	0.0109523	0.116323	0.102419	0.109371	0.00983113	0.16318	0.112	0.13759	0.0361899
ath-miR167c-5p	0.566038	0.373134	0.469586	0.136404	0.3	0.340694	0.320347	0.0287749	0.330357	0.297873	0.314115	0.0229699
ath-miR167d	0.183398	0.172547	0.177973	0.00767321	0.128233	0.101842	0.115038	0.0186611	0.13707	0.143319	0.140194	0.00441861
ath-miR168a-3p	0.0635838	0.103286	0.0834351	0.0280739	0	0.025	0.0125	0.0176777	0.0666667	0.142857	0.104762	0.0538747
ath-miR168a-5p	0.134028	0.114687	0.124358	0.0136764	0.151857	0.139579	0.145718	0.00868205	0.174246	0.171647	0.172946	0.00183765
ath-miR168b-3p	0	0	0	0	#DIV/0!	0	#DIV/0!	#DIV/0!	0.666667	#DIV/0!	#DIV/0!	#DIV/0!
ath-miR168b-5p	0.134028	0.114687	0.124358	0.0136764	0.151857	0.139579	0.145718	0.00868205	0.174246	0.171647	0.172946	0.00183765
ath-miR169a-3p	#DIV/0!	#DIV/0!	#DIV/0!	#DIV/0!	#DIV/0!	#DIV/0!	#DIV/0!	#DIV/0!	#DIV/0!	#DIV/0!	#DIV/0!	#DIV/0!
ath-miR169a-5p	0.75	0.5	0.625	0.176777	0.6	0.307692	0.453846	0.206693	0.272727	0.111111	0.191919	0.11428
ath-miR169b-3p	#DIV/0!	#DIV/0!	#DIV/0!	#DIV/0!	#DIV/0!	#DIV/0!	#DIV/0!	#DIV/0!	#DIV/0!	#DIV/0!	#DIV/0!	#DIV/0!
ath-miR169b-5p	0.75	0.5	0.625	0.176777	0.857143	0.454545	0.655844	0.284679	0.666667	0.166666	0.416667	0.353554
ath-miR169c	0.75	0.5	0.625	0.176777	0.857143	0.454545	0.655844	0.284679	0.666667	0.166666	0.416667	0.353554
ath-miR169d	#DIV/0!	1	#DIV/0!	#DIV/0!	#DIV/0!	#DIV/0!	#DIV/0!	#DIV/0!	0	#DIV/0!	#DIV/0!	#DIV/0!
ath-miR169e	#DIV/0!	1	#DIV/0!	#DIV/0!	#DIV/0!	#DIV/0!	#DIV/0!	#DIV/0!	0	#DIV/0!	#DIV/0!	#DIV/0!
ath-miR169f-3p	0	#DIV/0!	#DIV/0!	#DIV/0!	#DIV/0!	#DIV/0!	#DIV/0!	#DIV/0!	0	#DIV/0!	#DIV/0!	#DIV/0!
ath-miR169f-5p	#DIV/0!	1	#DIV/0!	#DIV/0!	#DIV/0!	#DIV/0!	#DIV/0!	#DIV/0!	0	#DIV/0!	#DIV/0!	#DIV/0!
ath-miR169g-3p	#DIV/0!	#DIV/0!	#DIV/0!	#DIV/0!	#DIV/0!	#DIV/0!	#DIV/0!	#DIV/0!	#DIV/0!	#DIV/0!	#DIV/0!	#DIV/0!
ath-miR169g-5p	#DIV/0!	1	#DIV/0!	#DIV/0!	#DIV/0!	#DIV/0!	#DIV/0!	#DIV/0!	0	#DIV/0!	#DIV/0!	#DIV/0!
ath-miR169h	0.800001	0.5	0.65	0.212132	1	0.625	0.8125	0.265165	0.545455	0.428572	0.487014	0.0826488
ath-miR169i	0.800001	0.5	0.65	0.212132	1	0.625	0.8125	0.265165	0.545455	0.428572	0.487014	0.0826488
ath-miR169j	0.800001	0.5	0.65	0.212132	1	0.625	0.8125	0.265165	0.545455	0.428572	0.487014	0.0826488
ath-miR169k	0.800001	0.5	0.65	0.212132	1	0.625	0.8125	0.265165	0.545455	0.428572	0.487014	0.0826488
ath-miR169l	0.800001	0.5	0.65	0.212132	1	0.625	0.8125	0.265165	0.545455	0.428572	0.487014	0.0826488
ath-miR169m	0.800001	0.5	0.65	0.212132	1	0.625	0.8125	0.265165	0.545455	0.428572	0.487014	0.0826488
ath-miR169n	0.800001	0.5	0.65	0.212132	1	0.625	0.8125	0.265165	0.545455	0.428572	0.487014	0.0826488
ath-miR170-3p	#DIV/0!	0	#DIV/0!	#DIV/0!	0.25	0.16	0.205	0.0636395	0.1	0.0714289	0.0857146	0.0202031
ath-miR170-5p	0.123028	0.06875	0.0958892	0.0383806	0.0729654	0.0558927	0.0644291	0.0120722	0.0857451	0.107143	0.096444	0.0151306
ath-miR171a-3p	0.111111	0.18421	0.147661	0.0516889	0.089686	0.0926217	0.0911538	0.00207581	0.118367	0.116162	0.117265	0.00155956
ath-miR171a-5p	0.123028	0.06875	0.0958892	0.0383806	0.0729654	0.0558927	0.0644291	0.0120722	0.0857451	0.107143	0.096444	0.0151306
ath-miR171b-3p	0.19149	0.186603	0.189046	0.00345535	0.125	0.152482	0.138741	0.0194331	0.329268	0.28821	0.308739	0.0290327
ath-miR171b-5p	0	0	0	0	0	0	0	0	#DIV/0!	#DIV/0!	#DIV/0!	#DIV/0!
ath-miR171c-3p	0.19149	0.186603	0.189046	0.00345535	0.125	0.152482	0.138741	0.0194331	0.329268	0.28821	0.308739	0.0290327
ath-miR171c-5p	0	0	0	0	0	0.166667	0.0833334	0.117851	#DIV/0!	#DIV/0!	#DIV/0!	#DIV/0!
ath-miR172a	0.117647	0.135135	0.126391	0.0123659	0.135135	0.103139	0.119137	0.0226246	0.142857	0.158228	0.150542	0.0108692
ath-miR172b-3p	0.117647	0.135135	0.126391	0.0123659	0.135135	0.103139	0.119137	0.0226246	0.142857	0.158228	0.150542	0.0108692
ath-miR172b-5p	#DIV/0!	#DIV/0!	#DIV/0!	#DIV/0!	#DIV/0!	#DIV/0!	#DIV/0!	#DIV/0!	#DIV/0!	#DIV/0!	#DIV/0!	#DIV/0!
ath-miR172c	1	0.5	0.75	0.353553	0.65	0.487804	0.568902	0.114689	0.575758	0.588235	0.581997	0.00882288
ath-miR172d-3p	1	0.5	0.75	0.353553	0.65	0.487804	0.568902	0.114689	0.575758	0.588235	0.581997	0.00882288
ath-miR172d-5p	#DIV/0!	#DIV/0!	#DIV/0!	#DIV/0!	#DIV/0!	#DIV/0!	#DIV/0!	#DIV/0!	#DIV/0!	#DIV/0!	#DIV/0!	#DIV/0!
ath-miR172e-3p	#DIV/0!	0	#DIV/0!	#DIV/0!	0	0.25	0.125	0.176777	0.125	0	0.0625	0.0883883
ath-miR172e-5p	#DIV/0!	#DIV/0!	#DIV/0!	#DIV/0!	#DIV/0!	#DIV/0!	#DIV/0!	#DIV/0!	#DIV/0!	#DIV/0!	#DIV/0!	#DIV/0!
ath-miR173-3p	0.253732	0.268292	0.261012	0.0102956	0.35	0.278689	0.314345	0.0504242	0.25	0.266667	0.258333	0.011785
ath-miR173-5p	0.23166	0.166428	0.199044	0.0461263	0.0697413	0.0545875	0.0621644	0.0107153	0.09128	0.090164	0.090722	0.000789106
ath-miR1886.1	0.2	0	0.0999999	0.141421	#DIV/0!	0	#DIV/0!	#DIV/0!	0	0	0	0
ath-miR1886.2	0.24	0.0754717	0.157736	0.116339	0.16129	0.0366972	0.0989938	0.0881007	0.0879122	0.0892859	0.088599	0.000971369
ath-miR1886.3	#DIV/0!	#DIV/0!	#DIV/0!	#DIV/0!	#DIV/0!	#DIV/0!	#DIV/0!	#DIV/0!	#DIV/0!	#DIV/0!	#DIV/0!	#DIV/0!
ath-miR1888a	0.0725805	0.105769	0.0891749	0.023468	0.0405405	0.145228	0.0928844	0.0740255	0.116883	0.0983607	0.107622	0.0130972
ath-miR1888b	0	0.538461	0.269231	0.380749	#DIV/0!	0.125	#DIV/0!	#DIV/0!	0.25	0	0.125	0.176777
ath-miR2111a-3p	#DIV/0!	#DIV/0!	#DIV/0!	#DIV/0!	#DIV/0!	#DIV/0!	#DIV/0!	#DIV/0!	0	#DIV/0!	#DIV/0!	#DIV/0!
ath-miR2111a-5p	#DIV/0!	#DIV/0!	#DIV/0!	#DIV/0!	0	0	0	0	0.5	0	0.25	0.353553
ath-miR2111b-3p	#DIV/0!	#DIV/0!	#DIV/0!	#DIV/0!	#DIV/0!	0	#DIV/0!	#DIV/0!	0	#DIV/0!	#DIV/0!	#DIV/0!
ath-miR2111b-5p	#DIV/0!	#DIV/0!	#DIV/0!	#DIV/0!	0	0	0	0	0.5	0	0.25	0.353553
ath-miR2112-3p	1	0	0.5	0.707107	1	0.333333	0.666667	0.471405	0	0.285714	0.142857	0.20203
ath-miR2112-5p	#DIV/0!	#DIV/0!	#DIV/0!	#DIV/0!	#DIV/0!	#DIV/0!	#DIV/0!	#DIV/0!	#DIV/0!	#DIV/0!	#DIV/0!	#DIV/0!
ath-miR2933a	#DIV/0!	#DIV/0!	#DIV/0!	#DIV/0!	#DIV/0!	#DIV/0!	#DIV/0!	#DIV/0!	#DIV/0!	#DIV/0!	#DIV/0!	#DIV/0!
ath-miR2933b	#DIV/0!	#DIV/0!	#DIV/0!	#DIV/0!	#DIV/0!	#DIV/0!	#DIV/0!	#DIV/0!	#DIV/0!	#DIV/0!	#DIV/0!	#DIV/0!
ath-miR2934-3p	#DIV/0!	#DIV/0!	#DIV/0!	#DIV/0!	#DIV/0!	0	#DIV/0!	#DIV/0!	#DIV/0!	#DIV/0!	#DIV/0!	#DIV/0!
ath-miR2934-5p	0	0.5	0.25	0.353553	0	0	0	0	0	0	0	0
ath-miR2936	#DIV/0!	#DIV/0!	#DIV/0!	#DIV/0!	0	#DIV/0!	#DIV/0!	#DIV/0!	#DIV/0!	#DIV/0!	#DIV/0!	#DIV/0!
ath-miR2939	#DIV/0!	#DIV/0!	#DIV/0!	#DIV/0!	#DIV/0!	#DIV/0!	#DIV/0!	#DIV/0!	#DIV/0!	#DIV/0!	#DIV/0!	#DIV/0!
ath-miR319a	0.392008	0.380982	0.386495	0.00779671	0.251441	0.265882	0.258662	0.0102113	0.226961	0.242936	0.234949	0.0112957
ath-miR319b	0.392008	0.380982	0.386495	0.00779671	0.251441	0.265882	0.258662	0.0102113	0.226961	0.242936	0.234949	0.0112957
ath-miR319c	0.957802	0.966212	0.962007	0.00594657	0.873251	0.890738	0.881994	0.0123651	0.88762	0.886124	0.886872	0.00105761
ath-miR3434-3p	#DIV/0!	#DIV/0!	#DIV/0!	#DIV/0!	#DIV/0!	#DIV/0!	#DIV/0!	#DIV/0!	#DIV/0!	#DIV/0!	#DIV/0!	#DIV/0!
ath-miR3434-5p	#DIV/0!	#DIV/0!	#DIV/0!	#DIV/0!	#DIV/0!	#DIV/0!	#DIV/0!	#DIV/0!	#DIV/0!	#DIV/0!	#DIV/0!	#DIV/0!
ath-miR3440b-3p	0.222222	0.0645162	0.143369	0.111515	0.214286	0.0714286	0.142857	0.101015	0.4	0.222222	0.311111	0.125708
ath-miR3440b-5p	#DIV/0!	0	#DIV/0!	#DIV/0!	0	0	0	0	0.166667	0	0.0833335	0.117851
ath-miR390a-3p	0.0681819	0.0467289	0.0574554	0.0151695	0.1	0.0451128	0.0725565	0.0388111	0.142857	0.142857	0.142857	3.15732e-07
ath-miR390a-5p	0.111111	0.107143	0.109127	0.00280609	0.2	0.1	0.15	0.0707105	0.223077	0.2	0.211538	0.0163175
ath-miR390b-3p	0.5	0.624999	0.5625	0.0883879	0.375	0.0999999	0.2375	0.194454	0.333333	0	0.166667	0.235702
ath-miR390b-5p	0.111111	0.107143	0.109127	0.00280609	0.2	0.1	0.15	0.0707105	0.223077	0.2	0.211538	0.0163175
ath-miR391-3p	#DIV/0!	#DIV/0!	#DIV/0!	#DIV/0!	#DIV/0!	0	#DIV/0!	#DIV/0!	#DIV/0!	#DIV/0!	#DIV/0!	#DIV/0!
ath-miR391-5p	0.233334	0.139786	0.18656	0.0661485	0.0598291	0.0872485	0.0735388	0.0193884	0.0920633	0.139344	0.115703	0.0334321
ath-miR3932a	#DIV/0!	#DIV/0!	#DIV/0!	#DIV/0!	#DIV/0!	#DIV/0!	#DIV/0!	#DIV/0!	#DIV/0!	#DIV/0!	#DIV/0!	#DIV/0!
ath-miR3932b-3p	#DIV/0!	#DIV/0!	#DIV/0!	#DIV/0!	#DIV/0!	#DIV/0!	#DIV/0!	#DIV/0!	#DIV/0!	#DIV/0!	#DIV/0!	#DIV/0!
ath-miR3932b-5p	0.104392	0.117552	0.110972	0.0093054	0.118169	0.0883639	0.103267	0.0210756	0.160714	0.193237	0.176976	0.0229971
ath-miR3933	#DIV/0!	#DIV/0!	#DIV/0!	#DIV/0!	#DIV/0!	#DIV/0!	#DIV/0!	#DIV/0!	#DIV/0!	#DIV/0!	#DIV/0!	#DIV/0!
ath-miR393a-3p	0	0.142857	0.0714286	0.101015	0	0.166667	0.0833333	0.117851	0	0	0	0
ath-miR393a-5p	0.180887	0.216535	0.198711	0.0252071	0.204081	0.207408	0.205745	0.00235209	0.167401	0.206896	0.187148	0.0279277
ath-miR393b-3p	0.0772533	0.0656371	0.0714452	0.00821388	0.155844	0.0642458	0.110045	0.0647698	0.150376	0.172839	0.161608	0.0158841
ath-miR393b-5p	0.180887	0.216535	0.198711	0.0252071	0.204081	0.207408	0.205745	0.00235209	0.167401	0.206896	0.187148	0.0279277
ath-miR394a	0.199134	0.203438	0.201286	0.00304308	0.161346	0.129567	0.145457	0.0224707	0.196847	0.1898	0.193324	0.00498308
ath-miR394b-3p	#DIV/0!	#DIV/0!	#DIV/0!	#DIV/0!	#DIV/0!	#DIV/0!	#DIV/0!	#DIV/0!	#DIV/0!	#DIV/0!	#DIV/0!	#DIV/0!
ath-miR394b-5p	0.199134	0.203438	0.201286	0.00304308	0.161346	0.129567	0.145457	0.0224707	0.196847	0.1898	0.193324	0.00498308
ath-miR395a	0.0856916	0.0941833	0.0899375	0.00600456	0.104645	0.0698708	0.0872579	0.0245891	0.088058	0.109155	0.0986065	0.0149178
ath-miR395b	0.0841845	0.094101	0.0891428	0.00701203	0.129938	0.088519	0.109229	0.0292879	0.167539	0.163865	0.165702	0.00259781
ath-miR395c	0.0841845	0.094101	0.0891428	0.00701203	0.129938	0.088519	0.109229	0.0292879	0.167539	0.163865	0.165702	0.00259781
ath-miR395d	0.0856916	0.0941833	0.0899375	0.00600456	0.104645	0.0698708	0.0872579	0.0245891	0.088058	0.109155	0.0986065	0.0149178
ath-miR395e	0.0856916	0.0941833	0.0899375	0.00600456	0.104645	0.0698708	0.0872579	0.0245891	0.088058	0.109155	0.0986065	0.0149178
ath-miR395f	0.0841845	0.094101	0.0891428	0.00701203	0.129938	0.088519	0.109229	0.0292879	0.167539	0.163865	0.165702	0.00259781
ath-miR396a-3p	0.0413035	0.0350659	0.0381847	0.00441066	0.0881671	0.0626306	0.0753988	0.018057	0.0857145	0.113636	0.0996755	0.0197438
ath-miR396a-5p	0.283359	0.317963	0.300661	0.024469	0.345761	0.309984	0.327873	0.0252984	0.410009	0.408432	0.40922	0.00111453
ath-miR396b-3p	0.0526316	0.0559007	0.0542661	0.00231159	0.0732758	0.070039	0.0716574	0.00228879	0.085837	0.076923	0.08138	0.00630312
ath-miR396b-5p	0.11418	0.116428	0.115304	0.00158924	0.107525	0.0916515	0.0995882	0.0112241	0.146506	0.156427	0.151467	0.00701499
ath-miR397a	0.770833	0.826087	0.79846	0.0390708	0.4	0.472924	0.436462	0.0515651	0.605263	0.561224	0.583243	0.03114
ath-miR397b	0.416666	0.347826	0.382246	0.0486773	0.296296	0.1625	0.229398	0.094608	0.132743	0.204081	0.168412	0.0504438
ath-miR398a-3p	0.853932	0.88239	0.868161	0.0201234	0.793548	0.784328	0.788938	0.0065194	0.80546	0.823424	0.814442	0.0127027
ath-miR398a-5p	#DIV/0!	#DIV/0!	#DIV/0!	#DIV/0!	#DIV/0!	#DIV/0!	#DIV/0!	#DIV/0!	#DIV/0!	#DIV/0!	#DIV/0!	#DIV/0!
ath-miR398b-3p	0.0644711	0.0669362	0.0657036	0.00174312	0.0820167	0.0622751	0.0721459	0.0139594	0.0903249	0.0994911	0.094908	0.00648146
ath-miR398b-5p	#DIV/0!	#DIV/0!	#DIV/0!	#DIV/0!	0	0	0	0	0	#DIV/0!	#DIV/0!	#DIV/0!
ath-miR398c-3p	0.0644711	0.0669362	0.0657036	0.00174312	0.0820167	0.0622751	0.0721459	0.0139594	0.0903249	0.0994911	0.094908	0.00648146
ath-miR398c-5p	#DIV/0!	#DIV/0!	#DIV/0!	#DIV/0!	0	0	0	0	0	#DIV/0!	#DIV/0!	#DIV/0!
ath-miR399a	0	0.333333	0.166667	0.235702	0	0.12	0.06	0.0848528	0.222223	0.285714	0.253968	0.0448954
ath-miR399b	0.056338	0.103687	0.0800123	0.0334806	0.121212	0.0874999	0.104356	0.0238381	0.171233	0.140244	0.155738	0.0219123
ath-miR399c-3p	0.056338	0.103687	0.0800123	0.0334806	0.121212	0.0874999	0.104356	0.0238381	0.171233	0.140244	0.155738	0.0219123
ath-miR399c-5p	#DIV/0!	#DIV/0!	#DIV/0!	#DIV/0!	#DIV/0!	#DIV/0!	#DIV/0!	#DIV/0!	#DIV/0!	#DIV/0!	#DIV/0!	#DIV/0!
ath-miR399d	0	0.5	0.25	0.353553	#DIV/0!	0.214286	#DIV/0!	#DIV/0!	0.428571	0.23077	0.32967	0.139867
ath-miR399e	0	1	0.5	0.707107	#DIV/0!	0.5	#DIV/0!	#DIV/0!	0.5	1	0.75	0.353553
ath-miR399f	#DIV/0!	0.5	#DIV/0!	#DIV/0!	0	0.142857	0.0714286	0.101015	0.2	0.142857	0.171428	0.0404062
ath-miR400	1	0.571429	0.785714	0.303046	0	0.0999999	0.0499999	0.0707106	0.187499	0.214286	0.200893	0.0189411
ath-miR402	0.891304	0.918699	0.905002	0.0193712	0.704545	0.8	0.752273	0.0674965	0.916667	0.954545	0.935606	0.0267845
ath-miR403-3p	0.385628	0.407887	0.396757	0.0157392	0.329314	0.283253	0.306283	0.0325702	0.391972	0.430542	0.411257	0.0272726
ath-miR403-5p	0.0828026	0.0756756	0.0792391	0.0050395	0.048969	0.042514	0.0457415	0.0045644	0.0642861	0.0650408	0.0646634	0.000533684
ath-miR404	#DIV/0!	#DIV/0!	#DIV/0!	#DIV/0!	1	1	1	0	1	1	1	0
ath-miR406	#DIV/0!	#DIV/0!	#DIV/0!	#DIV/0!	1	#DIV/0!	#DIV/0!	#DIV/0!	1	#DIV/0!	#DIV/0!	#DIV/0!
ath-miR408-3p	0.109619	0.125476	0.117547	0.0112131	0.137102	0.104089	0.120595	0.0233436	0.155952	0.164562	0.160257	0.00608857
ath-miR408-5p	0.0608901	0.0581895	0.0595398	0.00190964	0.0796564	0.0635648	0.0716106	0.0113785	0.0961538	0.107054	0.101604	0.00770762
ath-miR419	#DIV/0!	#DIV/0!	#DIV/0!	#DIV/0!	#DIV/0!	#DIV/0!	#DIV/0!	#DIV/0!	1	#DIV/0!	#DIV/0!	#DIV/0!
ath-miR4221	#DIV/0!	0.4	#DIV/0!	#DIV/0!	0.25	0	0.125	0.176777	0	#DIV/0!	#DIV/0!	#DIV/0!
ath-miR4227	#DIV/0!	#DIV/0!	#DIV/0!	#DIV/0!	1	#DIV/0!	#DIV/0!	#DIV/0!	#DIV/0!	1	#DIV/0!	#DIV/0!
ath-miR4228-3p	0.117647	0.217392	0.167519	0.0705301	0	0.230769	0.115385	0.163178	0.25	0	0.125	0.176777
ath-miR4228-5p	#DIV/0!	#DIV/0!	#DIV/0!	#DIV/0!	1	#DIV/0!	#DIV/0!	#DIV/0!	#DIV/0!	#DIV/0!	#DIV/0!	#DIV/0!
ath-miR4239	#DIV/0!	#DIV/0!	#DIV/0!	#DIV/0!	#DIV/0!	#DIV/0!	#DIV/0!	#DIV/0!	#DIV/0!	#DIV/0!	#DIV/0!	#DIV/0!
ath-miR4243	#DIV/0!	#DIV/0!	#DIV/0!	#DIV/0!	#DIV/0!	0	#DIV/0!	#DIV/0!	1	#DIV/0!	#DIV/0!	#DIV/0!
ath-miR4245	#DIV/0!	#DIV/0!	#DIV/0!	#DIV/0!	0	#DIV/0!	#DIV/0!	#DIV/0!	#DIV/0!	#DIV/0!	#DIV/0!	#DIV/0!
ath-miR447a-3p	0.181331	0.202055	0.191693	0.0146545	0.261411	0.183626	0.222519	0.0550021	0.272727	0.330434	0.30158	0.0408056
ath-miR447a.2-3p	0.0879311	0.0662357	0.0770834	0.015341	0.0782314	0.0758684	0.0770499	0.00167086	0.0870919	0.0876567	0.0873743	0.000399383
ath-miR447b	0.181331	0.202055	0.191693	0.0146545	0.261411	0.183626	0.222519	0.0550021	0.272727	0.330434	0.30158	0.0408056
ath-miR447c-3p	#DIV/0!	#DIV/0!	#DIV/0!	#DIV/0!	#DIV/0!	1	#DIV/0!	#DIV/0!	#DIV/0!	#DIV/0!	#DIV/0!	#DIV/0!
ath-miR447c-5p	#DIV/0!	#DIV/0!	#DIV/0!	#DIV/0!	#DIV/0!	#DIV/0!	#DIV/0!	#DIV/0!	#DIV/0!	#DIV/0!	#DIV/0!	#DIV/0!
ath-miR472-3p	0.12228	0.118503	0.120392	0.00267027	0.118881	0.104792	0.111837	0.0099625	0.169687	0.145038	0.157363	0.0174295
ath-miR472-5p	0	#DIV/0!	#DIV/0!	#DIV/0!	0	0	0	0	#DIV/0!	1	#DIV/0!	#DIV/0!
ath-miR5012	0.402174	0.375795	0.388985	0.0186524	0.0762332	0.12669	0.101461	0.0356781	0.184874	0.240741	0.212808	0.0395038
ath-miR5013	0	#DIV/0!	#DIV/0!	#DIV/0!	#DIV/0!	0	#DIV/0!	#DIV/0!	#DIV/0!	#DIV/0!	#DIV/0!	#DIV/0!
ath-miR5014a-3p	#DIV/0!	0	#DIV/0!	#DIV/0!	#DIV/0!	#DIV/0!	#DIV/0!	#DIV/0!	#DIV/0!	#DIV/0!	#DIV/0!	#DIV/0!
ath-miR5014a-5p	#DIV/0!	#DIV/0!	#DIV/0!	#DIV/0!	#DIV/0!	#DIV/0!	#DIV/0!	#DIV/0!	#DIV/0!	#DIV/0!	#DIV/0!	#DIV/0!
ath-miR5014b	#DIV/0!	#DIV/0!	#DIV/0!	#DIV/0!	#DIV/0!	#DIV/0!	#DIV/0!	#DIV/0!	#DIV/0!	#DIV/0!	#DIV/0!	#DIV/0!
ath-miR5019	#DIV/0!	#DIV/0!	#DIV/0!	#DIV/0!	#DIV/0!	0	#DIV/0!	#DIV/0!	#DIV/0!	#DIV/0!	#DIV/0!	#DIV/0!
ath-miR5020a	0	#DIV/0!	#DIV/0!	#DIV/0!	#DIV/0!	#DIV/0!	#DIV/0!	#DIV/0!	#DIV/0!	#DIV/0!	#DIV/0!	#DIV/0!
ath-miR5020b	#DIV/0!	#DIV/0!	#DIV/0!	#DIV/0!	#DIV/0!	#DIV/0!	#DIV/0!	#DIV/0!	#DIV/0!	#DIV/0!	#DIV/0!	#DIV/0!
ath-miR5020c	0	1	0.5	0.707107	#DIV/0!	#DIV/0!	#DIV/0!	#DIV/0!	#DIV/0!	#DIV/0!	#DIV/0!	#DIV/0!
ath-miR5023	#DIV/0!	#DIV/0!	#DIV/0!	#DIV/0!	#DIV/0!	0	#DIV/0!	#DIV/0!	#DIV/0!	#DIV/0!	#DIV/0!	#DIV/0!
ath-miR5024-3p	0.117647	0.120536	0.119091	0.00204241	0.179487	0.118519	0.149003	0.0431113	0	0.142857	0.0714285	0.101015
ath-miR5024-5p	#DIV/0!	#DIV/0!	#DIV/0!	#DIV/0!	#DIV/0!	#DIV/0!	#DIV/0!	#DIV/0!	#DIV/0!	#DIV/0!	#DIV/0!	#DIV/0!
ath-miR5026	0.148488	0.110897	0.129692	0.0265805	0.1488	0.133333	0.141067	0.0109366	0.195076	0.202381	0.198728	0.00516553
ath-miR5027	#DIV/0!	1	#DIV/0!	#DIV/0!	#DIV/0!	#DIV/0!	#DIV/0!	#DIV/0!	0	#DIV/0!	#DIV/0!	#DIV/0!
ath-miR5028	0.5	0.142857	0.321428	0.252538	0	0.166666	0.0833332	0.117851	0	0	0	0
ath-miR5029	#DIV/0!	#DIV/0!	#DIV/0!	#DIV/0!	#DIV/0!	#DIV/0!	#DIV/0!	#DIV/0!	#DIV/0!	#DIV/0!	#DIV/0!	#DIV/0!
ath-miR5595a	0	0	0	0	0	0.333334	0.166667	0.235703	#DIV/0!	0	#DIV/0!	#DIV/0!
ath-miR5629	0.25	0	0.125	0.176776	0.5	0.333333	0.416667	0.117851	0.4	1	0.7	0.424264
ath-miR5631	#DIV/0!	#DIV/0!	#DIV/0!	#DIV/0!	1	0	0.5	0.707107	#DIV/0!	#DIV/0!	#DIV/0!	#DIV/0!
ath-miR5632-3p	0	0	0	0	#DIV/0!	0	#DIV/0!	#DIV/0!	#DIV/0!	#DIV/0!	#DIV/0!	#DIV/0!
ath-miR5632-5p	0	#DIV/0!	#DIV/0!	#DIV/0!	#DIV/0!	0	#DIV/0!	#DIV/0!	0	1	0.5	0.707107
ath-miR5633	#DIV/0!	#DIV/0!	#DIV/0!	#DIV/0!	#DIV/0!	#DIV/0!	#DIV/0!	#DIV/0!	0	#DIV/0!	#DIV/0!	#DIV/0!
ath-miR5634	#DIV/0!	#DIV/0!	#DIV/0!	#DIV/0!	#DIV/0!	#DIV/0!	#DIV/0!	#DIV/0!	#DIV/0!	#DIV/0!	#DIV/0!	#DIV/0!
ath-miR5635a	#DIV/0!	#DIV/0!	#DIV/0!	#DIV/0!	#DIV/0!	#DIV/0!	#DIV/0!	#DIV/0!	#DIV/0!	#DIV/0!	#DIV/0!	#DIV/0!
ath-miR5635b	#DIV/0!	#DIV/0!	#DIV/0!	#DIV/0!	#DIV/0!	#DIV/0!	#DIV/0!	#DIV/0!	#DIV/0!	#DIV/0!	#DIV/0!	#DIV/0!
ath-miR5635c	#DIV/0!	#DIV/0!	#DIV/0!	#DIV/0!	#DIV/0!	#DIV/0!	#DIV/0!	#DIV/0!	#DIV/0!	#DIV/0!	#DIV/0!	#DIV/0!
ath-miR5635d	#DIV/0!	#DIV/0!	#DIV/0!	#DIV/0!	#DIV/0!	#DIV/0!	#DIV/0!	#DIV/0!	#DIV/0!	#DIV/0!	#DIV/0!	#DIV/0!
ath-miR5636	#DIV/0!	#DIV/0!	#DIV/0!	#DIV/0!	#DIV/0!	#DIV/0!	#DIV/0!	#DIV/0!	#DIV/0!	#DIV/0!	#DIV/0!	#DIV/0!
ath-miR5637	0	0.125	0.0624999	0.0883882	0	0	0	0	0.1	0	0.0500001	0.0707108
ath-miR5638a	0	#DIV/0!	#DIV/0!	#DIV/0!	#DIV/0!	#DIV/0!	#DIV/0!	#DIV/0!	0	#DIV/0!	#DIV/0!	#DIV/0!
ath-miR5638b	#DIV/0!	#DIV/0!	#DIV/0!	#DIV/0!	0.5	0.142857	0.321429	0.252538	0	#DIV/0!	#DIV/0!	#DIV/0!
ath-miR5639-3p	#DIV/0!	#DIV/0!	#DIV/0!	#DIV/0!	#DIV/0!	#DIV/0!	#DIV/0!	#DIV/0!	#DIV/0!	#DIV/0!	#DIV/0!	#DIV/0!
ath-miR5639-5p	#DIV/0!	0	#DIV/0!	#DIV/0!	0	0.5	0.25	0.353553	0	0	0	0
ath-miR5640	0.258064	0.434783	0.346423	0.124959	0.166667	0.28	0.223333	0.0801389	0	0	0	0
ath-miR5641	0	0	0	0	#DIV/0!	0.666666	#DIV/0!	#DIV/0!	#DIV/0!	0	#DIV/0!	#DIV/0!
ath-miR5642a	0.902439	0.869823	0.886131	0.023063	0.902922	0.92758	0.915251	0.0174357	0.869806	0.898877	0.884341	0.0205561
ath-miR5642b	0.902439	0.869823	0.886131	0.023063	0.902922	0.92758	0.915251	0.0174357	0.869806	0.898877	0.884341	0.0205561
ath-miR5643a	#DIV/0!	0	#DIV/0!	#DIV/0!	0	0.25	0.125	0.176777	#DIV/0!	#DIV/0!	#DIV/0!	#DIV/0!
ath-miR5643b	#DIV/0!	0	#DIV/0!	#DIV/0!	0	0.25	0.125	0.176777	#DIV/0!	#DIV/0!	#DIV/0!	#DIV/0!
ath-miR5644	#DIV/0!	0	#DIV/0!	#DIV/0!	#DIV/0!	#DIV/0!	#DIV/0!	#DIV/0!	#DIV/0!	#DIV/0!	#DIV/0!	#DIV/0!
ath-miR5645a	#DIV/0!	#DIV/0!	#DIV/0!	#DIV/0!	#DIV/0!	#DIV/0!	#DIV/0!	#DIV/0!	#DIV/0!	#DIV/0!	#DIV/0!	#DIV/0!
ath-miR5645b	#DIV/0!	#DIV/0!	#DIV/0!	#DIV/0!	#DIV/0!	#DIV/0!	#DIV/0!	#DIV/0!	#DIV/0!	#DIV/0!	#DIV/0!	#DIV/0!
ath-miR5645c	#DIV/0!	#DIV/0!	#DIV/0!	#DIV/0!	#DIV/0!	1	#DIV/0!	#DIV/0!	#DIV/0!	#DIV/0!	#DIV/0!	#DIV/0!
ath-miR5645d	#DIV/0!	#DIV/0!	#DIV/0!	#DIV/0!	#DIV/0!	#DIV/0!	#DIV/0!	#DIV/0!	#DIV/0!	#DIV/0!	#DIV/0!	#DIV/0!
ath-miR5645e	#DIV/0!	#DIV/0!	#DIV/0!	#DIV/0!	#DIV/0!	#DIV/0!	#DIV/0!	#DIV/0!	#DIV/0!	#DIV/0!	#DIV/0!	#DIV/0!
ath-miR5645f	#DIV/0!	#DIV/0!	#DIV/0!	#DIV/0!	#DIV/0!	#DIV/0!	#DIV/0!	#DIV/0!	#DIV/0!	#DIV/0!	#DIV/0!	#DIV/0!
ath-miR5646	#DIV/0!	#DIV/0!	#DIV/0!	#DIV/0!	#DIV/0!	#DIV/0!	#DIV/0!	#DIV/0!	#DIV/0!	#DIV/0!	#DIV/0!	#DIV/0!
ath-miR5647	0	1	0.5	0.707107	0	0.25	0.125	0.176777	1	#DIV/0!	#DIV/0!	#DIV/0!
ath-miR5648-3p	#DIV/0!	#DIV/0!	#DIV/0!	#DIV/0!	#DIV/0!	#DIV/0!	#DIV/0!	#DIV/0!	#DIV/0!	#DIV/0!	#DIV/0!	#DIV/0!
ath-miR5648-5p	0	0.307693	0.153846	0.217572	0.384615	0.28125	0.332933	0.0730904	0.153846	0.142857	0.148352	0.00777051
ath-miR5649a	#DIV/0!	#DIV/0!	#DIV/0!	#DIV/0!	#DIV/0!	#DIV/0!	#DIV/0!	#DIV/0!	#DIV/0!	#DIV/0!	#DIV/0!	#DIV/0!
ath-miR5649b	#DIV/0!	#DIV/0!	#DIV/0!	#DIV/0!	#DIV/0!	#DIV/0!	#DIV/0!	#DIV/0!	#DIV/0!	#DIV/0!	#DIV/0!	#DIV/0!
ath-miR5650	0.0373135	0.0576922	0.0475028	0.0144099	0.047619	0.0233918	0.0355054	0.0171312	0.108109	0.0434782	0.0757934	0.0457005
ath-miR5651	0.0892859	0.103896	0.0965909	0.0103308	0	0.0578513	0.0289257	0.040907	0.0937494	0.04	0.0668747	0.0380066
ath-miR5652	0.0833333	0	0.0416667	0.0589256	0.3125	0.137931	0.225216	0.123439	0	0	0	0
ath-miR5653	0.166667	0.0454544	0.106061	0.0857102	0.25	0	0.125	0.176777	0	#DIV/0!	#DIV/0!	#DIV/0!
ath-miR5654-3p	0.060423	0.0573066	0.0588648	0.0022036	0.066129	0.0432395	0.0546843	0.0161854	0.0394737	0.0391062	0.0392899	0.000259849
ath-miR5654-5p	#DIV/0!	#DIV/0!	#DIV/0!	#DIV/0!	#DIV/0!	0	#DIV/0!	#DIV/0!	#DIV/0!	#DIV/0!	#DIV/0!	#DIV/0!
ath-miR5655	#DIV/0!	#DIV/0!	#DIV/0!	#DIV/0!	#DIV/0!	#DIV/0!	#DIV/0!	#DIV/0!	#DIV/0!	#DIV/0!	#DIV/0!	#DIV/0!
ath-miR5656	#DIV/0!	#DIV/0!	#DIV/0!	#DIV/0!	#DIV/0!	0	#DIV/0!	#DIV/0!	0	#DIV/0!	#DIV/0!	#DIV/0!
ath-miR5657	1	1	1	0	0.666666	0.727273	0.69697	0.0428553	1	0.666667	0.833333	0.235702
ath-miR5658	#DIV/0!	#DIV/0!	#DIV/0!	#DIV/0!	0	#DIV/0!	#DIV/0!	#DIV/0!	#DIV/0!	0	#DIV/0!	#DIV/0!
ath-miR5659	#DIV/0!	#DIV/0!	#DIV/0!	#DIV/0!	#DIV/0!	#DIV/0!	#DIV/0!	#DIV/0!	#DIV/0!	#DIV/0!	#DIV/0!	#DIV/0!
ath-miR5660	#DIV/0!	#DIV/0!	#DIV/0!	#DIV/0!	#DIV/0!	1	#DIV/0!	#DIV/0!	#DIV/0!	#DIV/0!	#DIV/0!	#DIV/0!
ath-miR5661	#DIV/0!	#DIV/0!	#DIV/0!	#DIV/0!	#DIV/0!	#DIV/0!	#DIV/0!	#DIV/0!	#DIV/0!	#DIV/0!	#DIV/0!	#DIV/0!
ath-miR5662	#DIV/0!	#DIV/0!	#DIV/0!	#DIV/0!	#DIV/0!	#DIV/0!	#DIV/0!	#DIV/0!	#DIV/0!	#DIV/0!	#DIV/0!	#DIV/0!
ath-miR5663-3p	#DIV/0!	#DIV/0!	#DIV/0!	#DIV/0!	0	#DIV/0!	#DIV/0!	#DIV/0!	#DIV/0!	#DIV/0!	#DIV/0!	#DIV/0!
ath-miR5663-5p	#DIV/0!	#DIV/0!	#DIV/0!	#DIV/0!	#DIV/0!	#DIV/0!	#DIV/0!	#DIV/0!	0	#DIV/0!	#DIV/0!	#DIV/0!
ath-miR5664	#DIV/0!	#DIV/0!	#DIV/0!	#DIV/0!	#DIV/0!	#DIV/0!	#DIV/0!	#DIV/0!	#DIV/0!	#DIV/0!	#DIV/0!	#DIV/0!
ath-miR5665	1	#DIV/0!	#DIV/0!	#DIV/0!	1	#DIV/0!	#DIV/0!	#DIV/0!	#DIV/0!	#DIV/0!	#DIV/0!	#DIV/0!
ath-miR5666	#DIV/0!	#DIV/0!	#DIV/0!	#DIV/0!	#DIV/0!	#DIV/0!	#DIV/0!	#DIV/0!	#DIV/0!	#DIV/0!	#DIV/0!	#DIV/0!
ath-miR5995b	0	0	0	0	0	0.333334	0.166667	0.235703	#DIV/0!	0	#DIV/0!	#DIV/0!
ath-miR5996	0.114019	0.0844895	0.0992542	0.0208804	0.0647059	0.0487396	0.0567227	0.0112899	0.0845772	0.127119	0.105848	0.0300813
ath-miR5997	0	#DIV/0!	#DIV/0!	#DIV/0!	0	0	0	0	#DIV/0!	0	#DIV/0!	#DIV/0!
ath-miR5998a	#DIV/0!	#DIV/0!	#DIV/0!	#DIV/0!	#DIV/0!	#DIV/0!	#DIV/0!	#DIV/0!	#DIV/0!	#DIV/0!	#DIV/0!	#DIV/0!
ath-miR5998b	#DIV/0!	#DIV/0!	#DIV/0!	#DIV/0!	#DIV/0!	#DIV/0!	#DIV/0!	#DIV/0!	#DIV/0!	#DIV/0!	#DIV/0!	#DIV/0!
ath-miR5999	0	#DIV/0!	#DIV/0!	#DIV/0!	#DIV/0!	0	#DIV/0!	#DIV/0!	#DIV/0!	#DIV/0!	#DIV/0!	#DIV/0!
ath-miR771	0.333333	0.333334	0.333333	5.27309e-07	0	0	0	0	0.200001	0	0.1	0.141422
ath-miR773a	0.893333	0.846154	0.869744	0.033361	0.85989	0.871859	0.865875	0.00846336	0.891008	0.882353	0.886681	0.0061203
ath-miR773b-3p	1	#DIV/0!	#DIV/0!	#DIV/0!	1	1	1	0	0.5	#DIV/0!	#DIV/0!	#DIV/0!
ath-miR774a	#DIV/0!	#DIV/0!	#DIV/0!	#DIV/0!	#DIV/0!	#DIV/0!	#DIV/0!	#DIV/0!	#DIV/0!	#DIV/0!	#DIV/0!	#DIV/0!
ath-miR775	0.764052	0.795549	0.779801	0.0222714	0.244913	0.30375	0.274332	0.0416038	0.43544	0.385068	0.410254	0.0356189
ath-miR776	#DIV/0!	#DIV/0!	#DIV/0!	#DIV/0!	#DIV/0!	#DIV/0!	#DIV/0!	#DIV/0!	#DIV/0!	#DIV/0!	#DIV/0!	#DIV/0!
ath-miR777	#DIV/0!	#DIV/0!	#DIV/0!	#DIV/0!	0	0.1	0.05	0.0707107	0.162162	0.204546	0.183354	0.0299697
ath-miR778	#DIV/0!	#DIV/0!	#DIV/0!	#DIV/0!	#DIV/0!	#DIV/0!	#DIV/0!	#DIV/0!	#DIV/0!	#DIV/0!	#DIV/0!	#DIV/0!
ath-miR779.1	1	1	1	0	0.6	0.793103	0.696552	0.136544	0.909091	0.846154	0.877622	0.0445031
ath-miR779.2	0.136364	0.205882	0.171123	0.0491569	0.0833333	0.0755815	0.0794574	0.00548139	0.191667	0.175	0.183333	0.0117852
ath-miR780.1	0.235295	0.181818	0.208556	0.0378136	0	0.214286	0.107143	0.151523	0.5	0	0.25	0.353553
ath-miR780.2	0	1	0.5	0.707107	0.5	0.25	0.375	0.176777	0	0	0	0
ath-miR781a	0.430107	0.431421	0.430764	0.000929432	0.194118	0.187879	0.190998	0.0044116	0.171171	0.18792	0.179545	0.0118434
ath-miR781b	0.430107	0.431421	0.430764	0.000929432	0.194118	0.187879	0.190998	0.0044116	0.171171	0.18792	0.179545	0.0118434
ath-miR782	#DIV/0!	#DIV/0!	#DIV/0!	#DIV/0!	#DIV/0!	#DIV/0!	#DIV/0!	#DIV/0!	#DIV/0!	#DIV/0!	#DIV/0!	#DIV/0!
ath-miR8121	#DIV/0!	#DIV/0!	#DIV/0!	#DIV/0!	#DIV/0!	#DIV/0!	#DIV/0!	#DIV/0!	#DIV/0!	#DIV/0!	#DIV/0!	#DIV/0!
ath-miR8165	#DIV/0!	#DIV/0!	#DIV/0!	#DIV/0!	#DIV/0!	#DIV/0!	#DIV/0!	#DIV/0!	#DIV/0!	#DIV/0!	#DIV/0!	#DIV/0!
ath-miR8166	#DIV/0!	#DIV/0!	#DIV/0!	#DIV/0!	0	#DIV/0!	#DIV/0!	#DIV/0!	#DIV/0!	#DIV/0!	#DIV/0!	#DIV/0!
ath-miR8167a	#DIV/0!	#DIV/0!	#DIV/0!	#DIV/0!	#DIV/0!	#DIV/0!	#DIV/0!	#DIV/0!	#DIV/0!	#DIV/0!	#DIV/0!	#DIV/0!
ath-miR8167b	#DIV/0!	#DIV/0!	#DIV/0!	#DIV/0!	#DIV/0!	#DIV/0!	#DIV/0!	#DIV/0!	#DIV/0!	#DIV/0!	#DIV/0!	#DIV/0!
ath-miR8167c	#DIV/0!	#DIV/0!	#DIV/0!	#DIV/0!	#DIV/0!	#DIV/0!	#DIV/0!	#DIV/0!	#DIV/0!	#DIV/0!	#DIV/0!	#DIV/0!
ath-miR8167d	#DIV/0!	#DIV/0!	#DIV/0!	#DIV/0!	#DIV/0!	#DIV/0!	#DIV/0!	#DIV/0!	#DIV/0!	#DIV/0!	#DIV/0!	#DIV/0!
ath-miR8167e	#DIV/0!	#DIV/0!	#DIV/0!	#DIV/0!	#DIV/0!	#DIV/0!	#DIV/0!	#DIV/0!	#DIV/0!	#DIV/0!	#DIV/0!	#DIV/0!
ath-miR8167f	#DIV/0!	#DIV/0!	#DIV/0!	#DIV/0!	#DIV/0!	#DIV/0!	#DIV/0!	#DIV/0!	#DIV/0!	#DIV/0!	#DIV/0!	#DIV/0!
ath-miR8168	#DIV/0!	#DIV/0!	#DIV/0!	#DIV/0!	#DIV/0!	1	#DIV/0!	#DIV/0!	#DIV/0!	#DIV/0!	#DIV/0!	#DIV/0!
ath-miR8169	#DIV/0!	#DIV/0!	#DIV/0!	#DIV/0!	#DIV/0!	#DIV/0!	#DIV/0!	#DIV/0!	0	#DIV/0!	#DIV/0!	#DIV/0!
ath-miR8170-3p	0.75	1	0.875	0.176777	#DIV/0!	0	#DIV/0!	#DIV/0!	0	#DIV/0!	#DIV/0!	#DIV/0!
ath-miR8170-5p	#DIV/0!	#DIV/0!	#DIV/0!	#DIV/0!	#DIV/0!	#DIV/0!	#DIV/0!	#DIV/0!	#DIV/0!	#DIV/0!	#DIV/0!	#DIV/0!
ath-miR8171	#DIV/0!	#DIV/0!	#DIV/0!	#DIV/0!	1	#DIV/0!	#DIV/0!	#DIV/0!	#DIV/0!	#DIV/0!	#DIV/0!	#DIV/0!
ath-miR8172	#DIV/0!	#DIV/0!	#DIV/0!	#DIV/0!	#DIV/0!	#DIV/0!	#DIV/0!	#DIV/0!	#DIV/0!	#DIV/0!	#DIV/0!	#DIV/0!
ath-miR8173	#DIV/0!	#DIV/0!	#DIV/0!	#DIV/0!	#DIV/0!	#DIV/0!	#DIV/0!	#DIV/0!	#DIV/0!	#DIV/0!	#DIV/0!	#DIV/0!
ath-miR8174	#DIV/0!	#DIV/0!	#DIV/0!	#DIV/0!	#DIV/0!	#DIV/0!	#DIV/0!	#DIV/0!	#DIV/0!	#DIV/0!	#DIV/0!	#DIV/0!
ath-miR8175	#DIV/0!	#DIV/0!	#DIV/0!	#DIV/0!	#DIV/0!	#DIV/0!	#DIV/0!	#DIV/0!	#DIV/0!	#DIV/0!	#DIV/0!	#DIV/0!
ath-miR8177	#DIV/0!	#DIV/0!	#DIV/0!	#DIV/0!	#DIV/0!	#DIV/0!	#DIV/0!	#DIV/0!	#DIV/0!	#DIV/0!	#DIV/0!	#DIV/0!
ath-miR8178	#DIV/0!	#DIV/0!	#DIV/0!	#DIV/0!	#DIV/0!	#DIV/0!	#DIV/0!	#DIV/0!	#DIV/0!	#DIV/0!	#DIV/0!	#DIV/0!
ath-miR8179	#DIV/0!	0	#DIV/0!	#DIV/0!	0	0	0	0	0.333333	0.5	0.416667	0.117851
ath-miR8180	0	#DIV/0!	#DIV/0!	#DIV/0!	1	0	0.5	0.707107	#DIV/0!	#DIV/0!	#DIV/0!	#DIV/0!
ath-miR8181	#DIV/0!	#DIV/0!	#DIV/0!	#DIV/0!	#DIV/0!	#DIV/0!	#DIV/0!	#DIV/0!	#DIV/0!	#DIV/0!	#DIV/0!	#DIV/0!
ath-miR8182	0	0.222223	0.111111	0.157135	0	0.0799999	0.0399999	0.0565685	0.111111	0	0.0555556	0.0785674
ath-miR8183	0.113208	0.0697675	0.0914876	0.0307169	0	0.125	0.0625	0.0883883	0.181818	0.25	0.215909	0.0482115
ath-miR8184	0.222222	0.333334	0.277778	0.0785681	0	0	0	0	#DIV/0!	0	#DIV/0!	#DIV/0!
ath-miR822-3p	0.588236	0.480001	0.534118	0.0765336	0.263158	0.307693	0.285425	0.0314906	0.226415	0.333333	0.279874	0.0756025
ath-miR822-5p	0.160377	0.208955	0.184666	0.0343496	0.115903	0.0826291	0.099266	0.0235282	0.12441	0.191753	0.158081	0.0476187
ath-miR823	0.0444445	0.102041	0.0732426	0.0407266	0.048	0.0700934	0.0590467	0.0156224	0.0833335	0.0789474	0.0811404	0.00310143
ath-miR824-3p	0.5	0	0.25	0.353553	0.2	0.25	0.225	0.0353555	0.4	0	0.2	0.282843
ath-miR824-5p	0.160494	0.126866	0.14368	0.0237785	0.192982	0.124031	0.158507	0.048756	0.116438	0.129032	0.122735	0.00890514
ath-miR825	0.0573771	0.0613139	0.0593455	0.00278374	0.047619	0.040672	0.0441455	0.00491225	0.0633144	0.0577427	0.0605286	0.00393982
ath-miR826a	#DIV/0!	0	#DIV/0!	#DIV/0!	#DIV/0!	#DIV/0!	#DIV/0!	#DIV/0!	0	0	0	0
ath-miR826b	#DIV/0!	#DIV/0!	#DIV/0!	#DIV/0!	#DIV/0!	#DIV/0!	#DIV/0!	#DIV/0!	#DIV/0!	#DIV/0!	#DIV/0!	#DIV/0!
ath-miR827	0.307693	0.210526	0.25911	0.0687076	0.25	0.136364	0.193182	0.080353	0.15	0.461538	0.305769	0.220291
ath-miR828	0	0	0	0	0	0.181818	0.090909	0.128565	0.599999	0	0.299999	0.424263
ath-miR829-3p.1	#DIV/0!	#DIV/0!	#DIV/0!	#DIV/0!	#DIV/0!	#DIV/0!	#DIV/0!	#DIV/0!	0	#DIV/0!	#DIV/0!	#DIV/0!
ath-miR829-3p.2	0.25	0	0.125	0.176777	0.5	0	0.25	0.353553	0	0	0	0
ath-miR829-5p	0	0.4	0.2	0.282843	0	0	0	0	0	0	0	0
ath-miR830-3p	#DIV/0!	0	#DIV/0!	#DIV/0!	#DIV/0!	0	#DIV/0!	#DIV/0!	#DIV/0!	0.333333	#DIV/0!	#DIV/0!
ath-miR830-5p	0	0	0	0	0	0.333334	0.166667	0.235703	#DIV/0!	0.5	#DIV/0!	#DIV/0!
ath-miR831-3p	0.0487805	0.0723353	0.0605579	0.0166558	0.031746	0.0301508	0.0309484	0.00112799	0	0	0	0
ath-miR831-5p	#DIV/0!	#DIV/0!	#DIV/0!	#DIV/0!	#DIV/0!	#DIV/0!	#DIV/0!	#DIV/0!	#DIV/0!	#DIV/0!	#DIV/0!	#DIV/0!
ath-miR832-3p	#DIV/0!	#DIV/0!	#DIV/0!	#DIV/0!	#DIV/0!	#DIV/0!	#DIV/0!	#DIV/0!	#DIV/0!	#DIV/0!	#DIV/0!	#DIV/0!
ath-miR832-5p	#DIV/0!	#DIV/0!	#DIV/0!	#DIV/0!	#DIV/0!	#DIV/0!	#DIV/0!	#DIV/0!	#DIV/0!	#DIV/0!	#DIV/0!	#DIV/0!
ath-miR833a-3p	#DIV/0!	0	#DIV/0!	#DIV/0!	0	0	0	0	#DIV/0!	#DIV/0!	#DIV/0!	#DIV/0!
ath-miR833a-5p	0.173469	0.11413	0.1438	0.0419588	0.047619	0.108434	0.0780265	0.0430026	0.103448	0.375	0.239224	0.192016
ath-miR833b	0.166666	0.125	0.145833	0.0294625	0.25	0.111111	0.180555	0.0982094	0.181818	0.5	0.340909	0.224988
ath-miR834	#DIV/0!	0	#DIV/0!	#DIV/0!	0	0	0	0	#DIV/0!	#DIV/0!	#DIV/0!	#DIV/0!
ath-miR835-3p	0	0	0	0	#DIV/0!	0	#DIV/0!	#DIV/0!	#DIV/0!	#DIV/0!	#DIV/0!	#DIV/0!
ath-miR835-5p	0	#DIV/0!	#DIV/0!	#DIV/0!	#DIV/0!	0	#DIV/0!	#DIV/0!	0	0	0	0
ath-miR836	#DIV/0!	#DIV/0!	#DIV/0!	#DIV/0!	1	0	0.5	0.707107	#DIV/0!	#DIV/0!	#DIV/0!	#DIV/0!
ath-miR837-3p	#DIV/0!	0	#DIV/0!	#DIV/0!	0	0.4	0.2	0.282843	#DIV/0!	#DIV/0!	#DIV/0!	#DIV/0!
ath-miR837-5p	1	0	0.5	0.707107	0	0	0	0	#DIV/0!	0	#DIV/0!	#DIV/0!
ath-miR838	0.029703	0.0235294	0.0266162	0.00436542	0.032967	0.0307693	0.0318681	0.00155406	0.0449438	0.0597015	0.0523227	0.0104353
ath-miR839-5p	0.0909091	0.125	0.107955	0.0241059	0.142857	0.137755	0.140306	0.00360766	0.111111	0.186047	0.148579	0.0529876
ath-miR840-3p	0.596386	0.686047	0.641216	0.0633999	0.733333	0.579677	0.656505	0.108652	0.589553	0.717172	0.653362	0.0902401
ath-miR840-5p	0.666667	0.5	0.583334	0.117851	0	0.375	0.1875	0.265165	0	0	0	0
ath-miR841a-3p	0.28	0.180556	0.230278	0.0703178	0.117647	0.0560001	0.0868236	0.0435911	0.111111	0.4	0.255556	0.204275
ath-miR841a-5p	0.111111	0.210526	0.160819	0.0702971	0	0.0421053	0.0210526	0.0297729	0.097561	0.161291	0.129426	0.0450636
ath-miR841b-3p	0.0660379	0.070707	0.0683725	0.00330152	0.16	0.0422536	0.101127	0.0832594	0.125	0	0.0625001	0.0883885
ath-miR841b-5p	0.285715	0.142857	0.214286	0.101016	0	0.0833334	0.0416667	0.0589256	0	0	0	0
ath-miR842	0.199999	0.538462	0.36923	0.239329	0.333333	0.461538	0.397436	0.0906547	0.222222	0.636364	0.429293	0.292842
ath-miR843	0.0733464	0.0434522	0.0583993	0.0211384	0.0433525	0.0451415	0.044247	0.00126497	0.0970148	0.109756	0.103386	0.00900954
ath-miR844-3p	0.25	0	0.125	0.176777	0	0.0555556	0.0277778	0.0392837	0.409091	0.230769	0.31993	0.126092
ath-miR844-5p	#DIV/0!	#DIV/0!	#DIV/0!	#DIV/0!	#DIV/0!	0	#DIV/0!	#DIV/0!	0	#DIV/0!	#DIV/0!	#DIV/0!
ath-miR845a	0.0485831	0.0537872	0.0511851	0.00367986	0.0538574	0.0418627	0.04786	0.00848152	0.0651464	0.0731708	0.0691586	0.00567411
ath-miR845b	0	0.072464	0.036232	0.0512398	0	0	0	0	0.5	0	0.25	0.353553
ath-miR846-3p	0.064772	0.0708135	0.0677927	0.00427196	0.0741688	0.0605506	0.0673597	0.00962948	0.0804423	0.089948	0.0851952	0.00672156
ath-miR846-5p	0.225564	0.256281	0.240922	0.0217203	0.0810811	0.0749185	0.0779998	0.0043576	0.088889	0.0789473	0.0839182	0.00702984
ath-miR847	0.0175439	0.0465117	0.0320278	0.0204834	0.111111	0.121951	0.116531	0.00766505	0.0425533	0.111111	0.0768321	0.0484775
ath-miR848	0.25	0.105263	0.177631	0.102344	0.047619	0.0833334	0.0654762	0.0252539	0.098039	0.206897	0.152468	0.0769739
ath-miR849	#DIV/0!	#DIV/0!	#DIV/0!	#DIV/0!	#DIV/0!	#DIV/0!	#DIV/0!	#DIV/0!	#DIV/0!	#DIV/0!	#DIV/0!	#DIV/0!
ath-miR850	0.431871	0.554956	0.493414	0.0870342	0.3125	0.339169	0.325834	0.0188575	0.529411	0.424656	0.477034	0.0740728
ath-miR851-3p	0	0	0	0	#DIV/0!	0	#DIV/0!	#DIV/0!	#DIV/0!	#DIV/0!	#DIV/0!	#DIV/0!
ath-miR851-5p	0	1	0.5	0.707107	0.75	0.5	0.625	0.176777	0.5	1	0.75	0.353553
ath-miR852	#DIV/0!	#DIV/0!	#DIV/0!	#DIV/0!	0	0.125	0.0625	0.0883883	0	0	0	0
ath-miR853	0.666667	0.5	0.583334	0.117851	0.5	0.571429	0.535714	0.0505078	0.727273	0.444444	0.585858	0.19999
ath-miR855	#DIV/0!	#DIV/0!	#DIV/0!	#DIV/0!	#DIV/0!	#DIV/0!	#DIV/0!	#DIV/0!	#DIV/0!	#DIV/0!	#DIV/0!	#DIV/0!
ath-miR856	#DIV/0!	#DIV/0!	#DIV/0!	#DIV/0!	#DIV/0!	1	#DIV/0!	#DIV/0!	#DIV/0!	#DIV/0!	#DIV/0!	#DIV/0!
ath-miR857	0.254902	0.220589	0.237745	0.0242633	0.256097	0.172131	0.214114	0.0593734	0.23913	0.0499999	0.144565	0.133735
ath-miR858a	0.294416	0.280624	0.28752	0.00975251	0.243288	0.236732	0.24001	0.0046363	0.276714	0.271293	0.274004	0.00383281
ath-miR858b	0.12	0.107693	0.113846	0.00870246	0.114679	0.085903	0.100291	0.0203477	0.116477	0.112956	0.114717	0.00248977
ath-miR859	0.4	0.5	0.45	0.0707106	0.4	0.0624999	0.23125	0.238649	0.200001	0	0.1	0.141422
ath-miR860	0.2	0.210526	0.205263	0.0074433	0	0	0	0	0.5	0.166666	0.333333	0.235702
ath-miR861-3p	#DIV/0!	#DIV/0!	#DIV/0!	#DIV/0!	#DIV/0!	#DIV/0!	#DIV/0!	#DIV/0!	#DIV/0!	#DIV/0!	#DIV/0!	#DIV/0!
ath-miR861-5p	#DIV/0!	#DIV/0!	#DIV/0!	#DIV/0!	#DIV/0!	#DIV/0!	#DIV/0!	#DIV/0!	#DIV/0!	#DIV/0!	#DIV/0!	#DIV/0!
ath-miR862-3p	#DIV/0!	#DIV/0!	#DIV/0!	#DIV/0!	#DIV/0!	#DIV/0!	#DIV/0!	#DIV/0!	#DIV/0!	#DIV/0!	#DIV/0!	#DIV/0!
ath-miR862-5p	0.300001	0.0967741	0.198387	0.143703	0.0769231	0.0862071	0.0815651	0.00656478	0.157894	0.0833333	0.120614	0.0527225
ath-miR863-3p	0	0	0	0	0	0.111111	0.0555556	0.0785674	0	0	0	0
ath-miR863-5p	0.537037	0.503597	0.520317	0.0236458	0.177778	0.247787	0.212783	0.0495042	0.166666	0.310345	0.238506	0.101596
ath-miR864-3p	#DIV/0!	#DIV/0!	#DIV/0!	#DIV/0!	#DIV/0!	#DIV/0!	#DIV/0!	#DIV/0!	#DIV/0!	0	#DIV/0!	#DIV/0!
ath-miR864-5p	0	0.153846	0.0769232	0.108786	0.285714	0.333333	0.309524	0.033672	0.333333	0.2	0.266667	0.0942809
ath-miR865-3p	#DIV/0!	#DIV/0!	#DIV/0!	#DIV/0!	#DIV/0!	#DIV/0!	#DIV/0!	#DIV/0!	#DIV/0!	1	#DIV/0!	#DIV/0!
ath-miR865-5p	0	#DIV/0!	#DIV/0!	#DIV/0!	0	0	0	0	#DIV/0!	0	#DIV/0!	#DIV/0!
ath-miR866-3p	0.5	0	0.25	0.353553	#DIV/0!	0	#DIV/0!	#DIV/0!	#DIV/0!	#DIV/0!	#DIV/0!	#DIV/0!
ath-miR866-5p	1	0.666666	0.833333	0.235703	0.8	0.533333	0.666667	0.188562	0.285714	0.5	0.392857	0.151523
ath-miR868-3p	#DIV/0!	#DIV/0!	#DIV/0!	#DIV/0!	#DIV/0!	#DIV/0!	#DIV/0!	#DIV/0!	#DIV/0!	#DIV/0!	#DIV/0!	#DIV/0!
ath-miR868-5p	0	0	0	0	#DIV/0!	0	#DIV/0!	#DIV/0!	0	0	0	0
ath-miR869.1	#DIV/0!	#DIV/0!	#DIV/0!	#DIV/0!	0	#DIV/0!	#DIV/0!	#DIV/0!	0	#DIV/0!	#DIV/0!	#DIV/0!
ath-miR869.2	0.0426709	0.0410366	0.0418538	0.00115559	0.0708661	0.0448915	0.0578788	0.0183668	0.0862067	0.0487806	0.0674936	0.0264643
ath-miR870-3p	0	0	0	0	0	0	0	0	#DIV/0!	0	#DIV/0!	#DIV/0!
ath-miR870-5p	0	#DIV/0!	#DIV/0!	#DIV/0!	#DIV/0!	#DIV/0!	#DIV/0!	#DIV/0!	#DIV/0!	#DIV/0!	#DIV/0!	#DIV/0!
miR156ij	0.309091	0.412698	0.360895	0.0732615	0.529412	0.179775	0.354594	0.24723	0.285715	0.272728	0.279221	0.00918304
miR159a-c	0.142507	0.120421	0.131464	0.0156171	0.131855	0.112146	0.122	0.0139363	0.15507	0.167034	0.161052	0.00846039
miR167abd	0.151232	0.137651	0.144441	0.00960305	0.129934	0.125712	0.127823	0.0029853	0.174289	0.181614	0.177952	0.00517918
miR169a-c	0.857143	0.666667	0.761905	0.134687	0.75	0.5	0.625	0.176777	0.466667	0.2	0.333333	0.188562
miR172a-d	0.210526	0.190476	0.200501	0.0141776	0.21875	0.172	0.195375	0.0330571	0.218446	0.25	0.234223	0.022312
miR319a-c	0.823119	0.851249	0.837184	0.0198911	0.686679	0.696681	0.69168	0.00707244	0.548131	0.55665	0.55239	0.00602359
miR395a-f	0.0848718	0.0944832	0.0896775	0.0067963	0.118734	0.0796791	0.0992067	0.0276162	0.114357	0.126092	0.120225	0.00829787
miR396ab	0.18086	0.185623	0.183241	0.00336733	0.179156	0.153696	0.166426	0.0180025	0.227974	0.241493	0.234734	0.00955909
miR398a-c	0.120504	0.12489	0.122697	0.00310128	0.15011	0.116472	0.133291	0.0237852	0.164663	0.179419	0.172041	0.010434
miR399a-f	0.0547945	0.109339	0.082067	0.0385691	0.118519	0.091623	0.105071	0.019018	0.179245	0.153439	0.166342	0.0182475

## Sheet: AGO10 IP-RPM
S4 Data. Composition of miRNA forms in AGO1 and AGO10 IP treated with SDN1 and SDN1 catalytic mutant (SDN1-D283A).
	AGO10 IP (Mock)										AGO10 IP (SDN1)										AGO10 IP (SDN1-D283A)
RPM	br1					br2					br1					br2					br1					br2
miRNAs	FL	TA-Only	TR-Only	TR-TA	TOTAL	FL	TA-Only	TR-Only	TR-TA	TOTAL	FL	TA-Only	TR-Only	TR-TA	TOTAL	FL	TA-Only	TR-Only	TR-TA	TOTAL	FL	TA-Only	TR-Only	TR-TA	TOTAL	FL	TA-Only	TR-Only	TR-TA	TOTAL
ath-miR156a-3p	1.52096	0	0.760482	0.253494	2.53494	2.12569	0	0	0.30367	2.42936	0	0	0	0	0	0.0950775	0	0	0	0.0950775	0.039747	0	0	0	0.039747	0.0393863	0	0	0	0.0393863
ath-miR156a-5p	1413.48	162.236	1017.78	357.173	2950.67	1606.42	164.589	781.344	446.699	2999.05	8.62617	1.64308	9.72156	4.51847	24.5093	8.84221	0.76062	8.36682	2.9474	20.917	10.1355	1.70912	7.43268	3.37849	22.6558	15.9908	1.69361	9.05885	4.37188	31.1151
ath-miR156b-3p	212.681	2.02795	137.901	51.4593	404.069	270.874	3.0367	221.983	70.7552	566.649	1.78	0	0.547693	0.273847	2.60154	1.23601	0	0.950775	0.475388	2.66217	1.3514	0.039747	0.834686	0.357723	2.58356	1.10282	0.0393863	0.74834	0.512022	2.40257
ath-miR156b-5p	1413.48	162.236	1017.78	357.173	2950.67	1606.42	164.589	781.344	446.699	2999.05	8.62617	1.64308	9.72156	4.51847	24.5093	8.84221	0.76062	8.36682	2.9474	20.917	10.1355	1.70912	7.43268	3.37849	22.6558	15.9908	1.69361	9.05885	4.37188	31.1151
ath-miR156c-3p	1.77446	0	1.26747	0	3.04193	0.911011	0	1.51835	0	2.42936	0.136923	0	0	0	0.136923	0	0	0	0	0	0.039747	0	0	0	0.039747	0	0	0	0	0
ath-miR156c-5p	1413.48	162.236	1017.78	357.173	2950.67	1606.42	164.589	781.344	446.699	2999.05	8.62617	1.64308	9.72156	4.51847	24.5093	8.84221	0.76062	8.36682	2.9474	20.917	10.1355	1.70912	7.43268	3.37849	22.6558	15.9908	1.69361	9.05885	4.37188	31.1151
ath-miR156d-3p	0	0	0.253494	0	0.253494	0	0	0.607341	0.30367	0.911011	0	0	0	0	0	0	0	0	0	0	0	0	0	0	0	0	0	0	0	0
ath-miR156d-5p	1413.48	162.236	1017.78	357.173	2950.67	1606.42	164.589	781.344	446.699	2999.05	8.62617	1.64308	9.72156	4.51847	24.5093	8.84221	0.76062	8.36682	2.9474	20.917	10.1355	1.70912	7.43268	3.37849	22.6558	15.9908	1.69361	9.05885	4.37188	31.1151
ath-miR156e	1413.48	162.236	1017.78	357.173	2950.67	1606.42	164.589	781.344	446.699	2999.05	8.62617	1.64308	9.72156	4.51847	24.5093	8.84221	0.76062	8.36682	2.9474	20.917	10.1355	1.70912	7.43268	3.37849	22.6558	15.9908	1.69361	9.05885	4.37188	31.1151
ath-miR156f-3p	0	0	0	0	0	0.30367	0	0	0	0.30367	0	0	0	0	0	0	0	0	0	0	0	0	0	0	0	0	0	0	0	0
ath-miR156f-5p	1413.48	162.236	1017.78	357.173	2950.67	1606.42	164.589	781.344	446.699	2999.05	8.62617	1.64308	9.72156	4.51847	24.5093	8.84221	0.76062	8.36682	2.9474	20.917	10.1355	1.70912	7.43268	3.37849	22.6558	15.9908	1.69361	9.05885	4.37188	31.1151
ath-miR156g	3.54892	1.01398	3.80241	1.26747	9.63278	3.94772	0.911011	0.911011	2.12569	7.89543	0	0	0	0	0	0	0	0	0	0	0.039747	0	0	0	0.039747	0.0393863	0.0393863	0.0393863	0.0393863	0.157545
ath-miR156h	0	0	0	0	0	0	0	0	0	0	0	0	0	0	0	0	0	0	0	0	0	0	0	0	0	0	0	0	0	0
ath-miR156i	0	0	1.01398	0.506988	1.52097	0	0	1.21468	0.911011	2.12569	0	0	0	0	0	0	0	0	0	0	0	0	0.039747	0	0.039747	0	0	0	0	0
ath-miR156j	1.52096	0	1.01398	1.01398	3.54892	0.30367	0	1.21468	0.911011	2.42936	0	0	0	0	0	0	0	0	0	0	0	0	0.039747	0	0.039747	0	0	0	0	0
ath-miR157a-3p	4.3094	0	1.77446	1.01398	7.09784	6.07341	0.30367	1.82202	0.607341	8.80644	0	0	0.136923	0	0.136923	0	0	0	0	0	0	0	0.039747	0	0.039747	0.118159	0	0.0393863	0	0.157545
[truncated: 383 more rows]

## Sheet: AGO10 IP-Abundance
S4 Data. Composition of miRNA forms in AGO1 and AGO10 IP treated with SDN1 and SDN1 catalytic mutant (SDN1-D283A).
[truncated: 401 more rows]

[truncated: 6 more sheets: AGO10 IP-Ratio-All, AGO10 IP-Ratio-FL, AGO10 IP-TR, AGO10 IP-Ratio-TA-only, AGO10-IP-SDN-Ratio-TR-only, AGO10 IP-Ratio-TR+TA]
