# Supplementary material for: ARGONAUTE10 promotes the degradation of miR165/6 through the SDN1 and SDN2 exonucleases in Arabidopsis
Source: PLoS Biol. 2017 Feb 23;15(2):e2001272. doi: 10.1371/journal.pbio.2001272 (PMC5322904; doi:10.1371/journal.pbio.2001272)
Supplement: S7 Data — (XLSX) [file pbio.2001272.s015.xlsx]

## Sheet: Full-length
S7 Data. Composition of miRNA forms in Col, AGO10 OE S1 and AGO10 OE 4mAGO1
Proportions of full-length, truncated-only, truncated-and-tailed, and tailed-only reads in total reads are shown in separate sheet as indicated.
Full-length reads/ total reads
miRNAs	Col	AGO10 OE S1	AGO10 OE 4mAGO1
ath-miR156a-f	0.482	0.572	0.373
ath-miR156g	0	0.333	0
ath-miR156h		0.667	0.25
ath-miR157a-c	0.573	0.529	0.444
ath-miR157d	0.364	0.348	0.271
ath-miR158a	0.428	0.451	0.278
ath-miR158b	0.277	0.354	0.291
ath-miR159a	0.894	0.908	0.874
ath-miR159b	0.591	0.69	0.715
ath-miR159c	0.002	0.005	0.003
ath-miR160a-c	0.667	0.636	0.255
ath-miR161.1	0.792	0.851	0.796
ath-miR161.2	0.158	0.146	0.107
ath-miR162a,b	0.787	0.819	0.784
ath-miR163	0.381	0.401	0.382
ath-miR164a,b	0.923	1	0.902
ath-miR164c	0	0	0.333
ath-miR165a,b	0.856	0.73	0.667
ath-miR166a-g	0.893	0.616	0.564
ath-miR167a,b	0.681	0.863	0.733
ath-miR167c	0.2	0.333	0.333
ath-miR167d	0.92	0.885	0.87
ath-miR168a,b	0.723	0.744	0.804
ath-miR169a	0.728	0.605	0.61
ath-miR169b,c	0.056	0.069	0.03
ath-miR169d-g
ath-miR169h-n	0.478	0.5	0.543
ath-miR170	1	1	0.917
ath-miR171a	0.921	0.931	0.785
ath-miR171b,c	0.3	0.211	0.28
ath-miR172a,b	0.8	1	1
ath-miR172c,d	1		1
ath-miR172e		1
ath-miR173	0.655	0.583	0.368
ath-miR319a,b	0.7	0.681	0.623
ath-miR319c	0.459	0.362	0.392
ath-miR390a,b	0.984	0.966	0.986
ath-miR391	1	0.75	0.6
ath-miR393a,b	0.486	0.4	0.227
ath-miR394a,b	0.92	0.853	0.793
ath-miR395a,d,e	0.714		0.933
ath-miR395b,c,f	0.909	1	0.902
ath-miR396a	0.954	0.93	0.852
ath-miR396b	0.755	0.793	0.746
ath-miR397a	0.813	0.571	0.583
ath-miR397b	0.922	0.911	0.934
ath-miR398a	0	0	0
ath-miR398b,c	0.969	0.983	0.953
ath-miR399a	1	1	0.959
ath-miR399b,c	0.982	0.96	0.935
ath-miR399d	1		0.375
ath-miR399e	0		0
ath-miR399f	0.75		0.714
ath-miR400	0.947	0.875	0.532
ath-miR402	0	0	0
ath-miR403	0.642	0.699	0.575
ath-miR408	0.98	0.942	0.958
ath-miR447a,b	0.333	0	0
ath-miR447a.2	0.853	0.781	0.58
ath-miR447c-5p			1
ath-miR472	1	1	0.929
ath-miR771		1
ath-miR773	0	0	0
ath-miR774	1
ath-miR775	0.216	0.32	0.208
ath-miR777	1	1	0.75
ath-miR779.1			0
ath-miR779.2	0.99	1	0.984
ath-miR780.1			0
ath-miR780.2	0	0.5	0
ath-miR781	0.722	0.864	0.667
ath-miR783			0.5
ath-miR822	0.618	0.587	0.578
ath-miR823	1	1	0.9
ath-miR824	0.9	0.793	0.829
ath-miR825	0.333	0.353	0.172
ath-miR827	0.4	1	0.864
ath-miR828	1		0.667
ath-miR829.1	0.002	0.003	0.004
ath-miR829.2	0.8	1	0.778
ath-miR830		1	1
ath-miR833-5p		0.75	0.5
ath-miR837-5p		1
ath-miR838	1		0.833
ath-miR839	1	0.667	1
ath-miR840	0	0.214	0.186
ath-miR841	0.5	0.75	0.545
ath-miR842	1	1	0.833
ath-miR843	0.75	1	0.818
ath-miR844	0.5	0	0
ath-miR845a	0	0.25	0.348
ath-miR845b			0
ath-miR846	0.948	0.887	0.887
ath-miR847		1
ath-miR848		0.5	1
ath-miR849	0		1
ath-miR850	0	0.455	0.208
ath-miR851-5p		1
ath-miR852		1	0.75
ath-miR853			0.5
ath-miR857	1		0.571
ath-miR858	0.553	0.391	0.319
ath-miR859	1	1	0.4
ath-miR860	1	0.833	0.8
ath-miR861-3p	1	0.909	0.917
ath-miR862-5p	1	1
ath-miR863-3p		1	0.5
ath-miR863-5p	1		1
ath-miR864-3p			0.5
ath-miR864-5p			0
ath-miR866-3p		0	0.5
ath-miR866-5p	0		0
ath-miR867		1
ath-miR869.1		0
ath-miR869.2	1	1	1
ath-miR1886.2	0.977	0.98	0.826
ath-miR1886.3		0.667
ath-miR1888	0	0.286	0.095
ath-miR2111a,b	1		0.963
ath-miR2112-3p		1	0.5
ath-miR2112-5p	0.5	1	0.5
ath-miR2933a	0	0	0
ath-miR2933b	0	0	0
ath-miR2934-5p		1
ath-miR3434	0	1	1
ath-miR3440b-3p	1
ath-miR4228			0
ath-miR5012	1	0.9	0.905
ath-miR5020b		0	0
ath-miR5026	0.839	0.875	0.913
ath-miR5028		1	0.667

## Sheet: Truncated-only
S7 Data. Composition of miRNA forms in Col, AGO10 OE S1 and AGO10 OE 4mAGO1
Proportions of full-length, truncated-only, truncated-and-tailed, and tailed-only reads in total reads are shown in separate sheet as indicated.
	Truncated-reads/ total reads
miRNA	Col	AGO10 OE S1	AGO10 OE 4mAGO1
ath-miR156a-f	0.007	0.006	0.006
ath-miR156g	0	0	0
ath-miR156h		0	0
ath-miR157a-c	0.014	0.009	0.011
ath-miR157d	0.247	0.077	0.052
ath-miR158a	0.088	0.084	0.133
ath-miR158b	0.076	0.031	0.069
ath-miR159a	0.094	0.075	0.087
ath-miR159b	0.343	0.232	0.19
ath-miR159c	0.883	0.814	0.773
ath-miR160a-c	0.111	0.182	0.196
ath-miR161.1	0.064	0.062	0.087
ath-miR161.2	0.677	0.652	0.505
ath-miR162a,b	0.104	0.11	0.112
ath-miR163	0.497	0.419	0.286
ath-miR164a,b	0	0	0
ath-miR164c	0	0	0
ath-miR165a,b	0.025	0.111	0.137
ath-miR166a-g	0.038	0.287	0.315
ath-miR167a,b	0.16	0.094	0.148
ath-miR167c	0	0.333	0.083
ath-miR167d	0.039	0.083	0.076
ath-miR168a,b	0.047	0.03	0.019
ath-miR169a	0.158	0.209	0.131
ath-miR169b,c	0.5	0.31	0.313
ath-miR169d-g
ath-miR169h-n	0.5	0.5	0.37
ath-miR170	0	0	0
ath-miR171a	0.026	0	0.031
ath-miR171b,c	0.133	0.053	0.04
ath-miR172a,b	0	0	0
ath-miR172c,d	0		0
ath-miR172e		0
ath-miR173	0	0.028	0.046
ath-miR319a,b	0.073	0.068	0.075
ath-miR319c	0.189	0.206	0.121
ath-miR390a,b	0.008	0.003	0
ath-miR391	0	0.25	0.2
ath-miR393a,b	0.2	0.26	0.308
ath-miR394a,b	0.04	0.053	0.078
ath-miR395a,d,e	0.286		0
ath-miR395b,c,f	0.091	0	0.073
ath-miR396a	0.026	0.037	0.055
ath-miR396b	0.179	0.149	0.167
ath-miR397a	0	0	0.083
ath-miR397b	0.035	0.044	0.023
ath-miR398a	0.25	0.5	0.421
ath-miR398b,c	0.007	0.009	0.016
ath-miR399a	0	0	0.015
ath-miR399b,c	0.018	0	0.024
ath-miR399d	0		0.25
ath-miR399e	0		0.25
ath-miR399f	0.25		0.095
ath-miR400	0	0.031	0
ath-miR402	0	0.125	0.156
ath-miR403	0.15	0.14	0.252
ath-miR408	0.005	0.027	0.009
ath-miR447a,b	0.333	0.2	0.111
ath-miR447a.2	0.029	0	0.008
ath-miR447c-5p			0
ath-miR472	0	0	0
ath-miR771		0
ath-miR773	0.059	0.063	0.044
ath-miR774	0
ath-miR775	0.039	0.027	0.062
ath-miR777	0	0	0.25
ath-miR779.1			0
ath-miR779.2	0	0	0
ath-miR780.1			0
ath-miR780.2	0	0	0
ath-miR781	0.222	0.136	0.133
ath-miR783			0
ath-miR822	0.059	0.065	0.056
ath-miR823	0	0	0
ath-miR824	0.05	0.103	0.029
ath-miR825	0	0	0
ath-miR827	0.4	0	0.04
ath-miR828	0		0.333
ath-miR829.1	0.996	0.994	0.994
ath-miR829.2	0	0	0.111
ath-miR830		0	0
ath-miR833-5p		0.25	0.5
ath-miR837-5p		0
ath-miR838	0		0
ath-miR839	0	0	0
ath-miR840	0	0.286	0.302
ath-miR841	0	0	0
ath-miR842	0	0	0
ath-miR843	0.25	0	0.091
ath-miR844	0	0	0
ath-miR845a	0.333	0	0.043
ath-miR845b			0
ath-miR846	0.009	0.023	0.017
ath-miR847		0
ath-miR848		0.5	0
ath-miR849	0		0
ath-miR850	0	0	0.042
ath-miR851-5p		0
ath-miR852		0	0.25
ath-miR853			0
ath-miR857	0		0
ath-miR858	0.368	0.391	0.277
ath-miR859	0	0	0
ath-miR860	0	0.167	0.2
ath-miR861-3p	0	0	0
ath-miR862-5p	0	0
ath-miR863-3p		0	0
ath-miR863-5p	0		0
ath-miR864-3p			0.5
ath-miR864-5p			0
ath-miR866-3p		0.5	0
ath-miR866-5p	0		0
ath-miR867		0
ath-miR869.1		1
ath-miR869.2	0	0	0
ath-miR1886.2	0	0	0.014
ath-miR1886.3		0
ath-miR1888	0.667	0.286	0.27
ath-miR2111a,b	0		0.037
ath-miR2112-3p		0	0.5
ath-miR2112-5p	0	0	0
ath-miR2933a	0	1	0
ath-miR2933b	0	1	0
ath-miR2934-5p		0
ath-miR3434	0	0	0
ath-miR3440b-3p	0
ath-miR4228			0
ath-miR5012	0	0	0
ath-miR5020b		0	0
ath-miR5026	0.065	0.045	0
ath-miR5028		0	0

## Sheet: Truncated-and-tailed
S7 Data. Composition of miRNA forms in Col, AGO10 OE S1 and AGO10 OE 4mAGO1
Proportions of full-length, truncated-only, truncated-and-tailed, and tailed-only reads in total reads are shown in separate sheet as indicated.
	Truncated-and-tailed reads/ total read
miRNA	Col	AGO10 OE S1	AGO10 OE 4mAGO1
ath-miR156a-f	0.013	0.017	0.027
ath-miR156g	0	0	0
ath-miR156h		0	0
ath-miR157a-c	0.026	0.022	0.071
ath-miR157d	0	0	0.01
ath-miR158a	0.266	0.273	0.366
ath-miR158b	0.151	0.126	0.166
ath-miR159a	0.007	0.01	0.015
ath-miR159b	0.024	0.029	0.034
ath-miR159c	0.113	0.177	0.22
ath-miR160a-c	0.167	0.182	0.51
ath-miR161.1	0.05	0.039	0.054
ath-miR161.2	0.09	0.113	0.164
ath-miR162a,b	0.068	0.047	0.079
ath-miR163	0.069	0.121	0.254
ath-miR164a,b	0.077	0	0.049
ath-miR164c	1	0	0.667
ath-miR165a,b	0.08	0.111	0.128
ath-miR166a-g	0.038	0.079	0.101
ath-miR167a,b	0.139	0.036	0.101
ath-miR167c	0.2	0	0.333
ath-miR167d	0.036	0.032	0.055
ath-miR168a,b	0.005	0.035	0.03
ath-miR169a	0.07	0.186	0.225
ath-miR169b,c	0.222	0.276	0.535
ath-miR169d-g
ath-miR169h-n	0	0	0.022
ath-miR170	0	0	0.083
ath-miR171a	0.026	0.069	0.062
ath-miR171b,c	0.067	0.395	0.48
ath-miR172a,b	0	0	0
ath-miR172c,d	0		0
ath-miR172e		0
ath-miR173	0.138	0.083	0.241
ath-miR319a,b	0.021	0.022	0.028
ath-miR319c	0.133	0.191	0.267
ath-miR390a,b	0	0.018	0.005
ath-miR391	0	0	0.2
ath-miR393a,b	0.286	0.34	0.433
ath-miR394a,b	0.04	0.04	0.052
ath-miR395a,d,e	0		0.067
ath-miR395b,c,f	0	0	0
ath-miR396a	0.007	0.012	0.018
ath-miR396b	0.047	0.05	0.055
ath-miR397a	0.063	0	0.083
ath-miR397b	0.019	0.022	0.012
ath-miR398a	0.75	0.375	0.579
ath-miR398b,c	0.022	0.006	0.022
ath-miR399a	0	0	0.026
ath-miR399b,c	0	0	0.024
ath-miR399d	0		0.375
ath-miR399e	1		0.75
ath-miR399f	0		0.143
ath-miR400	0	0	0.011
ath-miR402	1	0.875	0.802
ath-miR403	0.037	0.035	0.046
ath-miR408	0.01	0.004	0.004
ath-miR447a,b	0.333	0.6	0.778
ath-miR447a.2	0	0.063	0.012
ath-miR447c-5p			0
ath-miR472	0	0	0
ath-miR771		0
ath-miR773	0.118	0.063	0.111
ath-miR774	0
ath-miR775	0.392	0.32	0.331
ath-miR777	0	0	0
ath-miR779.1			0
ath-miR779.2	0.01	0	0.005
ath-miR780.1			0
ath-miR780.2	0	0	0
ath-miR781	0	0	0.156
ath-miR783			0
ath-miR822	0.029	0.043	0.044
ath-miR823	0	0	0
ath-miR824	0	0.103	0.057
ath-miR825	0.167	0	0.021
ath-miR827	0	0	0.008
ath-miR828	0		0
ath-miR829.1	0.001	0.001	0.001
ath-miR829.2	0.2	0	0.111
ath-miR830		0	0
ath-miR833-5p		0	0
ath-miR837-5p		0
ath-miR838	0		0.167
ath-miR839	0	0.333	0
ath-miR840	0.667	0.429	0.326
ath-miR841	0	0	0
ath-miR842	0	0	0
ath-miR843	0	0	0
ath-miR844	0	0	0
ath-miR845a	0.333	0.5	0.348
ath-miR845b			0.5
ath-miR846	0.017	0.033	0.02
ath-miR847		0
ath-miR848		0	0
ath-miR849	0		0
ath-miR850	0.333	0.182	0.146
ath-miR851-5p		0
ath-miR852		0	0
ath-miR853			0.5
ath-miR857	0		0
ath-miR858	0	0.043	0.128
ath-miR859	0	0	0.2
ath-miR860	0	0	0
ath-miR861-3p	0	0	0
ath-miR862-5p	0	0
ath-miR863-3p		0	0
ath-miR863-5p	0		0
ath-miR864-3p			0
ath-miR864-5p			0.667
ath-miR866-3p		0	0
ath-miR866-5p	0		0
ath-miR867		0
ath-miR869.1		0
ath-miR869.2	0	0	0
ath-miR1886.2	0	0	0.036
ath-miR1886.3		0.333
ath-miR1888	0.333	0.286	0.397
ath-miR2111a,b	0		0
ath-miR2112-3p		0	0
ath-miR2112-5p	0	0	0
ath-miR2933a	0	0	0
ath-miR2933b	0	0	0
ath-miR2934-5p		0
ath-miR3434	0	0	0
ath-miR3440b-3p	0
ath-miR4228			0
ath-miR5012	0	0	0
ath-miR5020b		0	1
ath-miR5026	0.032	0.045	0.008
ath-miR5028		0	0

## Sheet: Tailed-only
S7 Data. Composition of miRNA forms in Col, AGO10 OE S1 and AGO10 OE 4mAGO1
Proportions of full-length, truncated-only, truncated-and-tailed, and tailed-only reads in total reads are shown in separate sheet as indicated.
	Tailed-only reads/ total reads
miRNA	Col	AGO10 OE S1	AGO10 OE 4mAGO1
ath-miR156a-f	0.497	0.404	0.593
ath-miR156g	1	0.667	1
ath-miR156h		0.333	0.75
ath-miR157a-c	0.386	0.439	0.474
ath-miR157d	0.39	0.574	0.667
ath-miR158a	0.217	0.192	0.223
ath-miR158b	0.496	0.486	0.474
ath-miR159a	0.004	0.007	0.023
ath-miR159b	0.042	0.049	0.06
ath-miR159c	0.002	0.003	0.002
ath-miR160a-c	0.056	0	0.039
ath-miR161.1	0.091	0.046	0.063
ath-miR161.2	0.075	0.088	0.223
ath-miR162a,b	0.041	0.025	0.024
ath-miR163	0.042	0.045	0.053
ath-miR164a,b	0	0	0.049
ath-miR164c	0	1	0
ath-miR165a,b	0.02	0.037	0.056
ath-miR166a-g	0.025	0.015	0.017
ath-miR167a,b	0.021	0.007	0.018
ath-miR167c	0.6	0.333	0.25
ath-miR167d	0.005	0	0
ath-miR168a,b	0.215	0.187	0.145
ath-miR169a	0.044	0	0.03
ath-miR169b,c	0.222	0.345	0.111
ath-miR169d-g
ath-miR169h-n	0.022	0	0.065
ath-miR170	0	0	0
ath-miR171a	0.026	0	0.108
ath-miR171b,c	0.467	0.289	0.2
ath-miR172a,b	0.2	0	0
ath-miR172c,d	0		0
ath-miR172e		0
ath-miR173	0.207	0.306	0.345
ath-miR319a,b	0.205	0.229	0.274
ath-miR319c	0.215	0.241	0.22
ath-miR390a,b	0.008	0.012	0.01
ath-miR391	0	0	0
ath-miR393a,b	0.029	0	0.032
ath-miR394a,b	0	0.053	0.078
ath-miR395a,d,e	0		0
ath-miR395b,c,f	0	0	0.024
ath-miR396a	0.013	0.02	0.075
ath-miR396b	0.019	0.009	0.032
ath-miR397a	0.125	0.429	0.25
ath-miR397b	0.023	0.022	0.032
ath-miR398a	0	0.125	0
ath-miR398b,c	0.002	0.002	0.009
ath-miR399a	0	0	0
ath-miR399b,c	0	0.04	0.016
ath-miR399d	0		0
ath-miR399e	0		0
ath-miR399f	0		0.048
ath-miR400	0.053	0.094	0.457
ath-miR402	0	0	0.042
ath-miR403	0.171	0.125	0.127
ath-miR408	0.005	0.027	0.03
ath-miR447a,b	0	0.2	0.111
ath-miR447a.2	0.118	0.156	0.4
ath-miR447c-5p			0
ath-miR472	0	0	0.071
ath-miR771		0
ath-miR773	0.824	0.875	0.822
ath-miR774	0
ath-miR775	0.353	0.307	0.4
ath-miR777	0	0	0
ath-miR779.1			1
ath-miR779.2	0	0	0.01
ath-miR780.1			1
ath-miR780.2	1	0.5	1
ath-miR781	0.056	0	0.044
ath-miR783			0.5
ath-miR822	0.294	0.304	0.322
ath-miR823	0	0	0.1
ath-miR824	0.05	0	0.086
ath-miR825	0.5	0.618	0.804
ath-miR827	0.2	0	0.088
ath-miR828	0		0
ath-miR829.1	0.001	0.001	0.001
ath-miR829.2	0	0	0
ath-miR830		0	0
ath-miR833-5p		0	0
ath-miR837-5p		0
ath-miR838	0		0
ath-miR839	0	0	0
ath-miR840	0.333	0.071	0.186
ath-miR841	0.5	0.25	0.455
ath-miR842	0	0	0.167
ath-miR843	0	0	0.091
ath-miR844	0.5	1	1
ath-miR845a	0.333	0.25	0.261
ath-miR845b			0.5
ath-miR846	0.026	0.056	0.075
ath-miR847		0
ath-miR848		0	0
ath-miR849	1		0
ath-miR850	0.667	0.364	0.604
ath-miR851-5p		0
ath-miR852		0	0
ath-miR853			0
ath-miR857	0		0.429
ath-miR858	0.079	0.174	0.277
ath-miR859	0	0	0.4
ath-miR860	0	0	0
ath-miR861-3p	0	0.091	0.083
ath-miR862-5p	0	0
ath-miR863-3p		0	0.5
ath-miR863-5p	0		0
ath-miR864-3p			0
ath-miR864-5p			0.333
ath-miR866-3p		0.5	0.5
ath-miR866-5p	1		1
ath-miR867		0
ath-miR869.1		0
ath-miR869.2	0	0	0
ath-miR1886.2	0.023	0.02	0.123
ath-miR1886.3		0
ath-miR1888	0	0.143	0.238
ath-miR2111a,b	0		0
ath-miR2112-3p		0	0
ath-miR2112-5p	0.5	0	0.5
ath-miR2933a	1	0	1
ath-miR2933b	1	0	1
ath-miR2934-5p		0
ath-miR3434	1	0	0
ath-miR3440b-3p	0
ath-miR4228			1
ath-miR5012	0	0.1	0.095
ath-miR5020b		1	0
ath-miR5026	0.065	0.036	0.071
ath-miR5028		0	0.333

## Sheet: Raw reads
S7 Data. Composition of miRNA forms in Col, AGO10 OE S1 and AGO10 OE 4mAGO1
Proportions of full-length, truncated-only, truncated-and-tailed, and tailed-only reads in total reads are shown in separate sheet as indicated.
	Total Reads (Raw)
miRNA	Col	AGO10 OE S1	AGO10 OE 4mAGO1
ath-miR156a-f	2237	3776	8014
ath-miR156g	2	3	5
ath-miR156h	0	3	4
ath-miR157a-c	3195	10604	14693
ath-miR157d	77	155	96
ath-miR158a	40578	66957	243316
ath-miR158b	119	294	1057
ath-miR159a	39187	29516	42015
ath-miR159b	10787	9603	19301
ath-miR159c	2227	1485	2723
ath-miR160a-c	18	22	51
ath-miR161.1	342	583	1077
ath-miR161.2	1570	2055	4507
ath-miR162a,b	442	937	4935
ath-miR163	755	1407	1197
ath-miR164a,b	26	36	41
ath-miR164c	2	1	3
ath-miR165a,b	1260	1661	2445
ath-miR166a-g	5253	7761	13486
ath-miR167a,b	144	277	386
ath-miR167c	5	6	12
ath-miR167d	616	312	767
ath-miR168a,b	191	657	2397
ath-miR169a	114	43	236
ath-miR169b,c	36	29	99
ath-miR169d-g	0	0	0
ath-miR169h-n	46	18	46
ath-miR170	4	4	12
ath-miR171a	38	29	65
ath-miR171b,c	30	38	50
ath-miR172a,b	5	6	5
ath-miR172c,d	2	0	1
ath-miR172e	0	1	0
ath-miR173	29	36	87
ath-miR319a,b	2225	3321	5900
ath-miR319c	233	257	446
ath-miR390a,b	128	328	623
ath-miR391	1	4	5
ath-miR393a,b	35	50	691
ath-miR394a,b	50	75	116
ath-miR395a,d,e	7	0	15
ath-miR395b,c,f	11	3	41
ath-miR396a	3236	4162	7407
ath-miR396b	469	1049	2420
ath-miR397a	16	7	48
ath-miR397b	257	45	347
ath-miR398a	12	8	57
ath-miR398b,c	414	467	1498
ath-miR399a	20	6	196
ath-miR399b,c	56	25	124
ath-miR399d	1	0	8
ath-miR399e	2	0	4
ath-miR399f	4	0	21
ath-miR400	19	32	94
ath-miR402	6	16	96
ath-miR403	1557	3048	5146
ath-miR408	196	224	779
ath-miR447a,b	3	5	9
ath-miR447a.2	68	96	255
ath-miR447c-5p	0	0	1
ath-miR472	5	10	14
ath-miR771	0	1	0
ath-miR773	17	16	45
ath-miR774	1	0	0
ath-miR775	51	75	130
ath-miR777	3	4	4
ath-miR779.1	0	0	4
ath-miR779.2	99	101	193
ath-miR780.1	0	0	1
ath-miR780.2	1	8	1
ath-miR781	18	22	45
ath-miR783	0	0	2
ath-miR822	34	46	90
ath-miR823	7	9	10
ath-miR824	20	29	35
ath-miR825	18	34	291
ath-miR827	5	3	125
ath-miR828	1	0	3
ath-miR829.1	1704	2692	3359
ath-miR829.2	5	4	9
ath-miR830	0	2	1
ath-miR833-5p	0	4	2
ath-miR837-5p	0	1	0
ath-miR838	2	0	6
ath-miR839	6	3	7
ath-miR840	3	14	43
ath-miR841	4	4	11
ath-miR842	1	6	6
ath-miR843	4	5	11
ath-miR844	2	2	3
ath-miR845a	3	4	23
ath-miR845b	0	0	2
ath-miR846	232	301	345
ath-miR847	0	1	0
ath-miR848	0	2	2
ath-miR849	1	0	1
ath-miR850	3	11	48
ath-miR851-5p	0	1	0
ath-miR852	0	5	8
ath-miR853	0	0	4
ath-miR857	4	0	7
ath-miR858	38	23	47
ath-miR859	1	3	5
ath-miR860	13	6	10
ath-miR861-3p	13	11	12
ath-miR862-5p	1	1	0
ath-miR863-3p	0	1	2
ath-miR863-5p	2	0	3
ath-miR864-3p	0	0	2
ath-miR864-5p	0	0	3
ath-miR866-3p	0	2	4
ath-miR866-5p	3	0	2
ath-miR867	0	1	0
ath-miR869.1	0	1	0
ath-miR869.2	4	5	5
ath-miR1886.2	44	50	138
ath-miR1886.3	0	3	0
ath-miR1888	3	7	63
ath-miR2111a,b	1	0	27
ath-miR2112-3p	0	1	2
ath-miR2112-5p	2	1	2
ath-miR2933a	1	1	1
ath-miR2933b	1	1	1
ath-miR2934-5p	0	1	0
ath-miR3434	1	3	1
ath-miR3440b-3p	1	0	0
ath-miR4228	0	0	1
ath-miR5012	1	10	21
ath-miR5020b	0	1	1
ath-miR5026	31	112	127
ath-miR5028	0	1	3
